# Supplementary material
Source: PubMed Central journal article supplement (PMC4954603)
Supplement: NIHMS69217-supplement-Suppl_Files.pdf [file NIHMS69217-supplement-Suppl_Files.pdf]

## Supporting online material

### Materials and Methods

**Materials and reagents.** All reagents were obtained from Sigma-Aldrich (St Louis, USA) unless stated otherwise.

**Mouse husbandry and longevity study.** Generation and genotyping of S6K1 mutant mice are described elsewhere (S1). Male and female *S6K1<sup>-/-</sup>* and wild-type (WT) controls were generated from heterozygous breeding pairs and maintained on a C57BL/6 background after 10 backcrosses. Mice were housed in groups of three to eight same-sex littermates under specific pathogen-free conditions within individually ventilated cages (Techniplast UK Ltd, UK), as previously described (S2, S3), with *ad libitum* access to water and chow (2018 Teklad Global, Harlan Teklad, UK). Individuals were monitored daily and weighed monthly, but otherwise left undisturbed until they died. Survival was assessed from 52 female (29 *S6K1<sup>-/-</sup>*, 23 WT) and 45 male (19 *S6K1<sup>-/-</sup>*, 26 WT) mice, with all animals dead by the time of this report. Kaplan-Meier survival curves were constructed using known birth and death dates, with differences between groups evaluated using the log-rank test. Separate cohorts of *S6K1<sup>-/-</sup>* and WT female mice, derived from the same breeding pairs used to generate mice for the longevity study, but not included in the longevity study, were killed at 600 days of age for hormonal, metabolic and gene expression analyses. If death appeared imminent mice were weighed, euthanized and examined for macroscopic pathological changes using previously described protocols (S2, S3) with this date considered date of death. 10% of animals in the longevity study were euthanized, with the remainder dying spontaneously. Maximum (and minimum) lifespan was calculated from the oldest (youngest) 10% of individuals per group. Age at death was assessed using Cox regression analysis with date of birth, parental identity, sex and genotype included as independent variables (S3, S4). All procedures followed the 1986 UK Home Office Animals Procedures Act and in accordance with local ethical committee guidelines.

**Metabolic studies.** Fed/fasting blood glucose, glucose tolerance, fasting plasma insulin, fasting plasma leptin, fat mass and food intake were determined as previously described (S2). Insulin resistance was estimated using the updated homeostatic model assessment (HOMA2) model. Resting metabolic rate was measured by open-flow respirometry (Flow Max 210, Columbus Instruments, USA) and core body temperature determined using a rectal probe (Digitron Instrumentation Ltd, UK).

**Pituitary hormone and plasma IGF1 assays.** Pituitary glands were dissected and homogenised in 1ml of phosphate-buffered saline. Growth hormone, prolactin, luteinising hormone and thyroid stimulating hormone were measured as previously described (S2) using specific reagents provided by Dr A. L. Parlow and the National Institute of Diabetes and Digestive and Kidney Diseases, National Institute of Health, Bethesda, USA. Plasma IGF1 was measured by radioimmunoassay as described previously (S2).

**Measurement of T cell surface marker expression.** Naïve/memory CD4 and CD8 T cell subsets in venous blood were determined using flow cytometry as previously described (S2).

**Behavioural analysis.** General activity and exploratory drive were assayed in an open field arena. Female mice, at 600 days of age, were placed into the center of a chamber (45 × 45 × 30 cm) and allowed to explore for a period of 10 min. Activity was tracked using an automated computer system program (HVS Image 2100, Hampton, UK). Rotarod (Accelerating Model, Ugo Basile, Italy) was used to measure fore- and hind-limb motor coordination and balance. Mice were trained at 600 days of age, receiving two trials per day for two consecutive days. The rod accelerated from 5 to 40 rpm over 300 s and the latency to fall was recorded. Mice remaining on the apparatus after 300 s were removed and their time scored as 300 s.

**Generation, normalisation and analysis of microarray data.** Liver, skeletal muscle (gastrocnemius) and white adipose tissue mRNA was extracted from four 600 day old female *S6K1*<sup>-/-</sup> and four female WT littermates following standard protocols. Transcript changes were measured using mouse whole-genome oligonucleotide microarrays (Mouse Genome 430 2.0 Array, Affymetrix UK, UK). All protocols were undertaken at the Wolfson Institute for Biomedical Research Microarray Centre, University College London, UK. Raw image files were converted to probe-level data files (.cel files). Microarray data analysis followed the methods described previously (S2) except that both quantiles and loess values were used for normalisation, with Catmap outputs post-processed to retrieve two-sided p-values (S5). Microarray data is deposited at Array Express.

**AMPK kinase assays in isolated hepatocytes.** Hepatocytes were isolated by collagenase perfusion of liver from WT and *S6K1*<sup>-/-</sup> mice as previously described (S6). Cells were treated with 0.5mM AICAR (aminoimidazole carboxamide ribonucleotide) for 30 min before rapid lysis of the cells into 50mM HEPES pH7.4, 50mM NaF, 5mM sodium pyrophosphate, 1mM EDTA, 1mM DTT, 10% glycerol and 1% TritonX-100. AMPK complexes were immunoprecipitated from cell lysates using an antibody described previously (S7) which recognizes both  $\beta$ 1 and  $\beta$ 2 complexes and AMPK activity was determined by incorporation of <sup>32</sup>-P into the SAMS peptide (S8). Activity is described as nmoles of <sup>32</sup>-P incorporated into the SAMS peptide per mg of total cell protein used for immunoprecipitation.

**C. elegans experiments.** *aak-2(ok524)* animals (CGC) were outcrossed three times to N2 (WT Bristol strain) and subsequently mated with *rsk-1(ok1255)* to give double mutants. Diagnostic PCR primers are available on request. Prior to all experiments, animals were maintained at 20°C for at least two generations in the presence of food. Lifespan experiments were carried out using plates seeded with HT115 bacteria transformed with pL4440. Bacteria were allowed to grow for 2 days before 40 µg/ml fluorodeoxyuridine was added and late L4 animals were transferred. Worms were scored as dead or alive from day 1 of adulthood at 20°C. For protein samples adult worms were placed on RNAi plates, as previously described (S9), and their progeny harvested after 3-4

days. Western blotting of AMPK P172 (Cell Signalling) or  $\beta$ -Actin (Sigma) was as previously described (*S10*) using 50  $\mu$ g total protein. Worm length was measured using the Leica RXA2 and OpenLab software (Improvision, UK), and for this, the brood size and developmental assays worms were synchronized by a 1 hour timed egg lay.

**Statistical analyses.** Analyses were performed in Minitab (Version 15, Minitab Ltd, UK), SPSS (Version 17, SPSS Inc, USA) or JMP (Version 5.1, JMP, USA) software using unpaired t tests, one-way analysis of variance, log rank, general linear modelling and Cox regression analysis where appropriate. All non-significant interaction effects ( $p > 0.05$ ) were removed in order to obtain best-fitted models. Data were examined for normality using the F-test. Analysis of microarray data was performed in R (<http://CRAN.R-project.org/doc/FAQ/R-FAQ.html>). Results are mean  $\pm$  s.e.m. except where indicated.  $p < 0.05$  was regarded as statistically significant.

Fig. S1

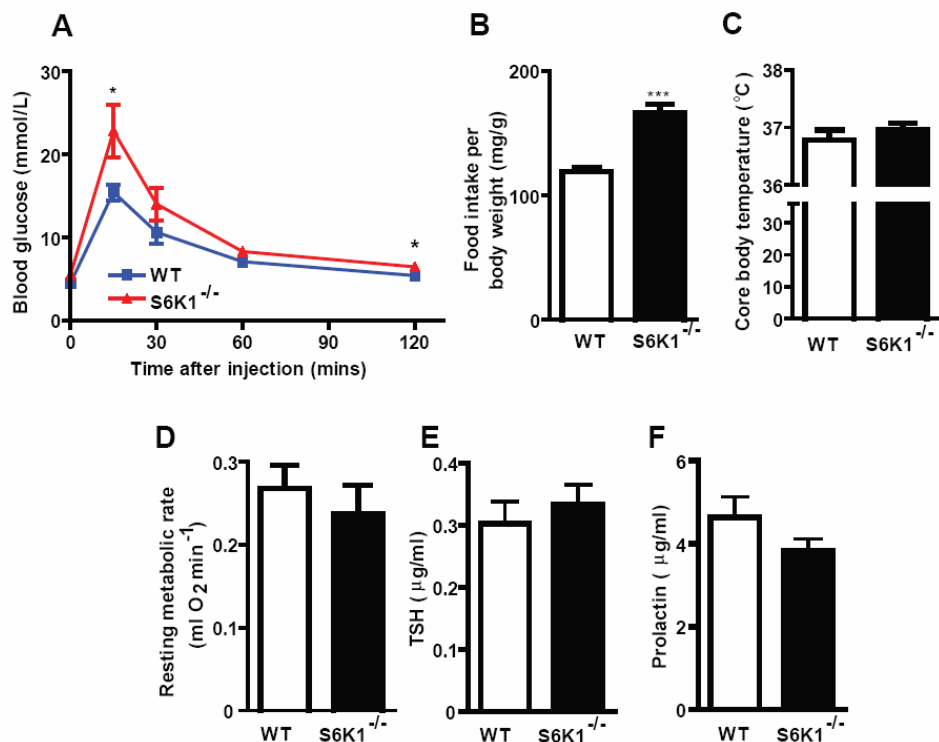

Fig. S1. Deletion of *S6K1*<sup>-/-</sup> impairs glucose tolerance in young female mice, increases mass-specific food intake in 600 day old female mice but does not alter body temperature, metabolic rate or pituitary hormone status. (A) *S6K1*<sup>-/-</sup> mice at 8 weeks of age have impaired glucose tolerance. (B) *S6K1*<sup>-/-</sup> mice have higher food intake, expressed per gram. (C) Rectal core body temperature and (D) resting metabolic rate do not differ between *S6K1*<sup>-/-</sup> and WT control mice. No differences in (E) pituitary TSH or (F) pituitary prolactin concentrations were observed between genotypes. Asterisk indicate statistical difference compared to control mice using two-tailed t-tests, where\* p<0.05 and \*\*\* p<0.001. n=8 for each genotype.

Fig. S2

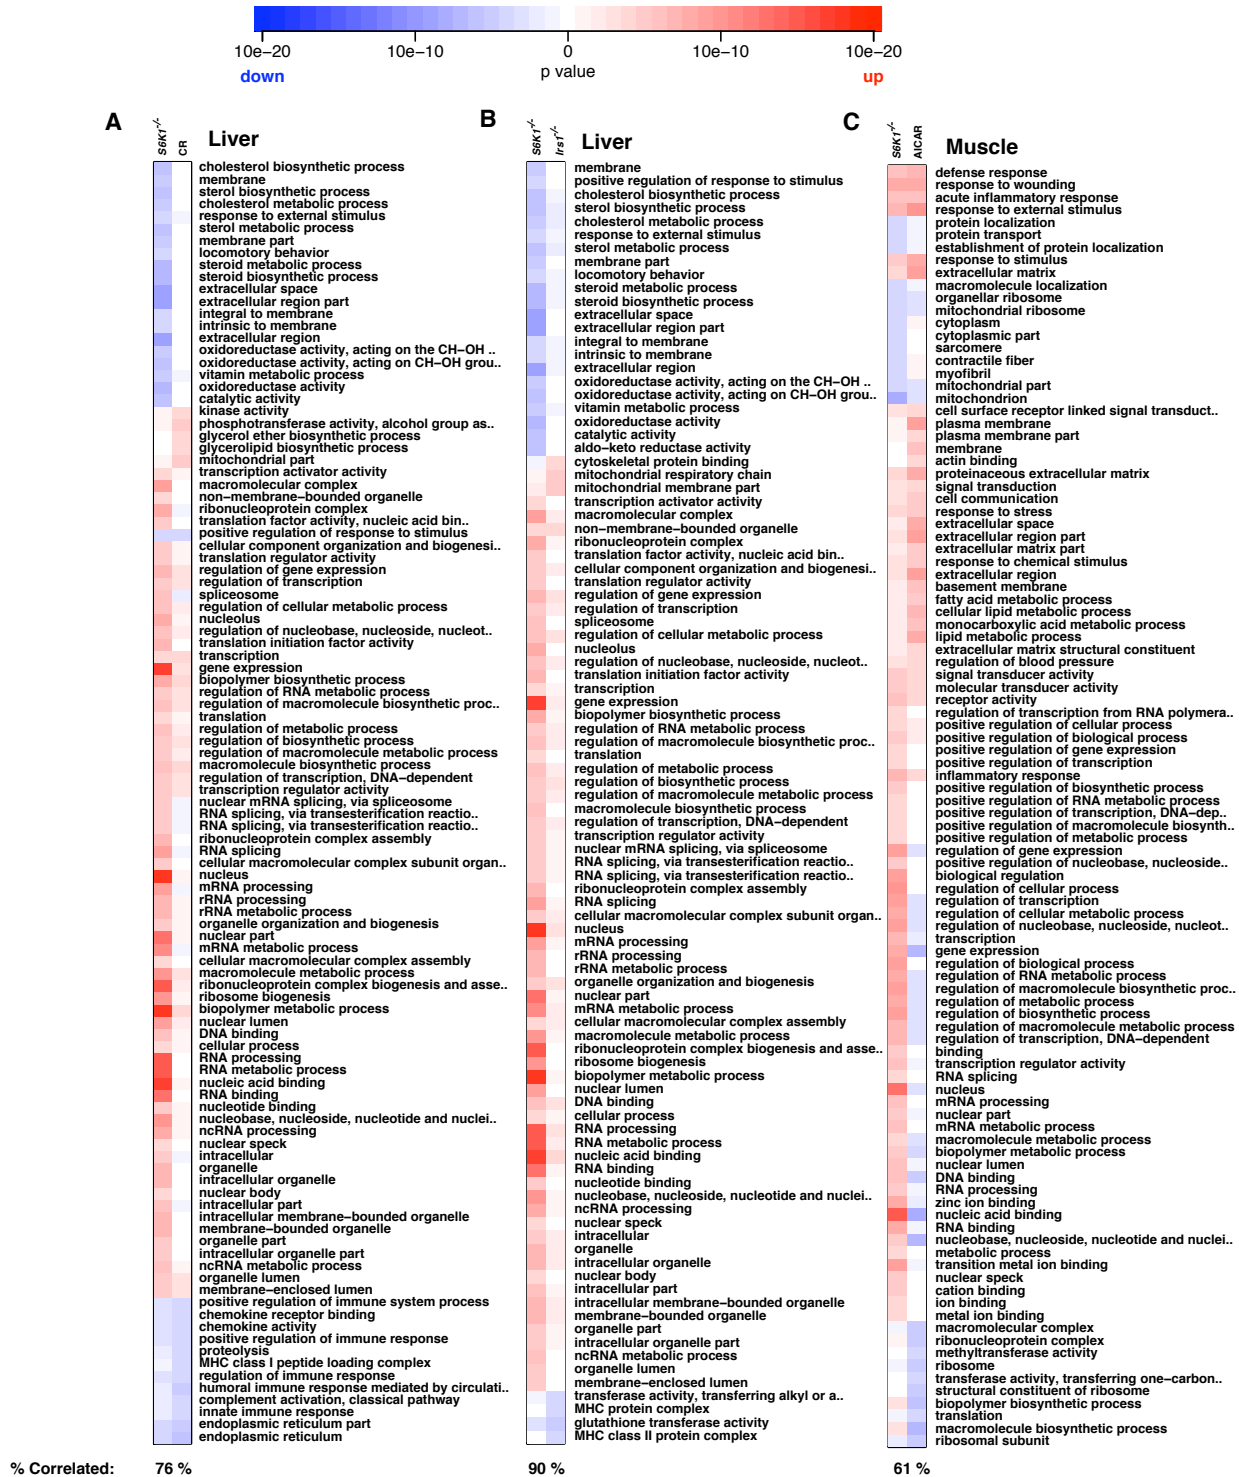

Fig. S2. Overlap in gene expression patterns and associated GO category annotation in long-lived *S6K1<sup>-/-</sup>* mice compared to other longevity assurance processes. Enrichment analysis of functional categories comparing gene expression in (A) liver from long-lived *S6K1<sup>-/-</sup>* mice and long-term CR (B) liver from long-lived *S6K1<sup>-/-</sup>* and *Irs1<sup>-/-</sup>* mice, and (C) skeletal muscle from long-lived *S6K1<sup>-/-</sup>* and mice treated with AICAR. Columns show significantly over-represented GO categories for the up-regulated (red) and down-regulated (blue) genes in either experiment ( $p < 0.0001$ ).

Table S1

| Covariate                  | B      | SE    | Wald  | df | Sig.  | Exp(B) | <u>95.0% CI</u><br>Low to High |
|----------------------------|--------|-------|-------|----|-------|--------|--------------------------------|
| DOB                        | -0.026 | 0.059 | 0.191 | 1  | 0.662 | 0.975  | 0.869 to 1.094                 |
| PID                        | -0.024 | 0.026 | 0.890 | 1  | 0.346 | 0.976  | 0.927 to 1.027                 |
| SEX                        |        |       |       |    |       |        |                                |
| Female                     | -0.332 | 0.218 | 2.317 | 1  | 0.128 | 0.718  | 0.468 to 1.100                 |
| Male                       | -      | -     | -     | -  | -     | -      | -                              |
| GENE                       |        |       |       |    |       |        |                                |
| <i>S6K1</i> <sup>-/-</sup> | 0.498  | 0.249 | 3.985 | 1  | 0.046 | 1.645  | 1.009 to 2.681                 |
| WT                         | -      | -     | -     | -  | -     | -      | -                              |

Table S1: Cox regression analysis of *S6K1*<sup>-/-</sup> and WT mice.

Age at death was analysed in pooled male and female systemic *S6K1*<sup>-/-</sup> and wild type (WT) mice using Cox regression analysis. The independent variables- date of birth (DOB), parental ID (PID), sex and genotype (GENE) - were replaced with a set of indicator variables to denote the presence or absence of category membership. B is the un-standardised regression coefficient and its standard error (SE), its Wald test statistic value (Wald), the degrees of freedom (df), and the significance (Sig.). Exp(B) for the covariate of interest is the predicted change in the hazard ratio for a unit increase in the predictor and the 95% confidence interval (CI) for Exp(B). Sample size = 48 for *S6K1*<sup>-/-</sup> and 49 for WT mice.

**Table S2a.** Genes upregulated in liver of *S6K*<sup>-/-</sup> mice compared to wild type mice.

| Probe <sup>1</sup> | t <sup>2</sup> | p-value  | q-value  | Mean <sup>3</sup> | FC <sup>4</sup> | Symbol        |
|--------------------|----------------|----------|----------|-------------------|-----------------|---------------|
| 1425644_at         | 17.51          | 1.26E-17 | 7.55E-14 | 7.43              | 4.41            | Lepr          |
| 1457263_at         | 15.1           | 7.70E-16 | 3.08E-12 | 10.57             | 3.12            | Serpina3k     |
| 1456156_at         | 14.71          | 1.57E-15 | 3.77E-12 | 8.33              | 3.9             | Lepr          |
| 1423867_at         | 13.95          | 6.61E-15 | 1.32E-11 | 8.33              | 3.92            | Serpina3k     |
| 1429399_at         | 13.28          | 2.48E-14 | 3.89E-11 | 11.51             | 1.9             | Rnf125        |
| 1435092_at         | 13.03          | 4.07E-14 | 5.42E-11 | 9.61              | 2.99            | Arl4a         |
| 1417980_a_at       | 12.57          | 1.04E-13 | 1.25E-10 | 12.88             | 1.93            | Insig2        |
| 1425875_a_at       | 12.32          | 1.75E-13 | 1.91E-10 | 4.94              | 3.41            | Lepr          |
| 1417409_at         | 11.87          | 4.62E-13 | 4.62E-10 | 9.2               | 3.49            | Jun           |
| 1417981_at         | 11.64          | 7.58E-13 | 6.81E-10 | 12.6              | 2.03            | Insig2        |
| 1455869_at         | 11.23          | 1.88E-12 | 1.50E-09 | 11.74             | 1.85            | Camk2b        |
| 1448694_at         | 11.17          | 2.15E-12 | 1.61E-09 | 7.65              | 2.97            | Jun           |
| 1435084_at         | 10.91          | 3.84E-12 | 2.56E-09 | 12.51             | 1.6             | C730049014Rik |
| 1450440_at         | 10.75          | 5.57E-12 | 3.34E-09 | 9.97              | 1.72            | Gfra1         |
| 1416332_at         | 10.64          | 7.16E-12 | 3.80E-09 | 8.62              | 2.28            | Cirbp         |
| 1418490_at         | 10.63          | 7.28E-12 | 3.80E-09 | 6.42              | 3.22            | Sdsl          |
| 1431429_a_at       | 10.63          | 7.28E-12 | 3.80E-09 | 10.6              | 2.1             | Arl4a         |
| 1425099_a_at       | 10.47          | 1.05E-11 | 5.25E-09 | 6.96              | 2.64            | Arntl         |
| 1453023_at         | 10.35          | 1.40E-11 | 6.73E-09 | 9.61              | 3.27            | 1110004012Rik |
| 1457117_at         | 10.3           | 1.57E-11 | 7.25E-09 | 6.75              | 3.58            | Nfe2l2        |
| 1417982_at         | 10.11          | 2.46E-11 | 1.04E-08 | 12.5              | 1.79            | Insig2        |
| 1421973_at         | 9.99           | 3.28E-11 | 1.23E-08 | 8.51              | 2.02            | Gfra1         |
| 1450970_at         | 9.85           | 4.61E-11 | 1.67E-08 | 12.75             | 1.53            | Got1          |
| 1436994_a_at       | 9.82           | 4.95E-11 | 1.74E-08 | 12.18             | 1.64            | Hist1h1c      |
| 1431213_a_at       | 9.8            | 5.16E-11 | 1.77E-08 | 10.71             | 1.89            | LOC67527      |
| 1434817_s_at       | 9.71           | 6.46E-11 | 2.10E-08 | 8.52              | 1.93            | 4930535B03Rik |
| 1440506_at         | 9.71           | 6.47E-11 | 2.10E-08 | 10.42             | 2.22            | Slc7a2        |
| 1440921_at         | 9.69           | 6.79E-11 | 2.14E-08 | 10.72             | 1.59            | Nlrp12        |
| 1417273_at         | 9.54           | 9.78E-11 | 2.86E-08 | 10.1              | 3.22            | Pdk4          |
| 1423523_at         | 9.48           | 1.14E-10 | 3.26E-08 | 13.01             | 1.3             | Aass          |
| 1417761_at         | 9.33           | 1.63E-10 | 4.43E-08 | 12.64             | 2.32            | Apoa4         |
| 1452260_at         | 9.22           | 2.15E-10 | 5.61E-08 | 7.14              | 5.13            | Cidec         |
| 1443109_at         | 9.2            | 2.28E-10 | 5.81E-08 | 6.25              | 2.77            | 5830417C01Rik |
| 1439015_at         | 9.11           | 2.85E-10 | 7.10E-08 | 10.43             | 1.45            | Gfra1         |
| 1437313_x_at       | 9.1            | 2.90E-10 | 7.10E-08 | 8.8               | 1.75            | Hmgb2         |
| 1419349_a_at       | 9.05           | 3.30E-10 | 7.53E-08 | 7.26              | 2.74            | Cyp2d9        |
| 1429050_at         | 9.05           | 3.33E-10 | 7.53E-08 | 9.78              | 1.94            | Chic2         |
| 1428143_a_at       | 9.01           | 3.65E-10 | 8.11E-08 | 9.18              | 1.81            | Pnpla2        |
| 1424744_at         | 8.94           | 4.37E-10 | 9.35E-08 | 11.64             | 1.44            | Sds           |
| 1448350_at         | 8.86           | 5.27E-10 | 1.07E-07 | 12.64             | 1.29            | Asl           |
| 1420965_a_at       | 8.75           | 7.00E-10 | 1.38E-07 | 9.09              | 2.34            | Enc1          |
| 1424573_at         | 8.72           | 7.65E-10 | 1.46E-07 | 12.02             | 1.32            | Tmed5         |
| 1418595_at         | 8.68           | 8.46E-10 | 1.54E-07 | 6.49              | 3.51            | S3-12         |
| 1448568_a_at       | 8.67           | 8.67E-10 | 1.55E-07 | 9.78              | 1.78            | Slc20a1       |
| 1421037_at         | 8.57           | 1.12E-09 | 1.90E-07 | 4.48              | 2.16            | Npas2         |
| 1422648_at         | 8.55           | 1.16E-09 | 1.90E-07 | 10.68             | 1.71            | Slc7a2        |
| 1436504_x_at       | 8.54           | 1.22E-09 | 1.92E-07 | 12.98             | 2               | Apoa4         |
| 1435779_at         | 8.51           | 1.32E-09 | 2.00E-07 | 6.71              | 2.73            | Cep110        |
| 1416101_a_at       | 8.41           | 1.70E-09 | 2.48E-07 | 11.45             | 1.46            | Hist1h1c      |
| 1434458_at         | 8.36           | 1.90E-09 | 2.71E-07 | 5.22              | 2.88            | Fst           |
| 1420961_a_at       | 8.25           | 2.53E-09 | 3.31E-07 | 4.7               | 1.95            | Ivns1abp      |

| Probe <sup>1</sup> | t <sup>2</sup> | p-value  | q-value  | Mean <sup>3</sup> | FC <sup>4</sup> | Symbol        |
|--------------------|----------------|----------|----------|-------------------|-----------------|---------------|
| 1427537_at         | 8.24           | 2.63E-09 | 3.39E-07 | 7.14              | 2.47            | Eppk1         |
| 1442277_at         | 8.22           | 2.80E-09 | 3.57E-07 | 6.55              | 1.91            | Chka          |
| 1440569_at         | 8.02           | 4.70E-09 | 5.48E-07 | 7.14              | 1.84            | Slc16a10      |
| 1426008_a_at       | 8              | 4.89E-09 | 5.63E-07 | 9.57              | 1.77            | Slc7a2        |
| 1416593_at         | 7.98           | 5.18E-09 | 5.83E-07 | 10.06             | 1.35            | Glrx          |
| 1416250_at         | 7.95           | 5.71E-09 | 6.25E-07 | 6.77              | 3.67            | Btg2          |
| 1453851_a_at       | 7.94           | 5.73E-09 | 6.25E-07 | 9.4               | 3.35            | Gadd45g       |
| 1454018_at         | 7.91           | 6.31E-09 | 6.64E-07 | 6.22              | 2.03            | Tlk2          |
| 1446148_x_at       | 7.91           | 6.31E-09 | 6.64E-07 | 6.4               | 2.07            | NA            |
| 1428468_at         | 7.89           | 6.63E-09 | 6.91E-07 | 8.3               | 1.53            | 3110043O21Rik |
| 1418712_at         | 7.88           | 6.80E-09 | 6.97E-07 | 5.83              | 1.92            | Cdc42ep5      |
| 1453817_at         | 7.86           | 7.15E-09 | 7.12E-07 | 9.21              | 1.52            | Abca6         |
| 1452534_a_at       | 7.83           | 7.74E-09 | 7.61E-07 | 7.43              | 1.91            | Hmgb2         |
| 1430319_at         | 7.68           | 1.15E-08 | 1.07E-06 | 8.28              | 2               | 4833411C07Rik |
| 1439163_at         | 7.67           | 1.20E-08 | 1.11E-06 | 6.58              | 2.82            | Zbtb16        |
| 1424937_at         | 7.59           | 1.46E-08 | 1.34E-06 | 11.11             | 1.94            | 2310076L09Rik |
| 1439399_a_at       | 7.57           | 1.56E-08 | 1.41E-06 | 10.01             | 1.04            | Snhg1         |
| 1456955_at         | 7.56           | 1.61E-08 | 1.44E-06 | 4.4               | 1.93            | NA            |
| 1424638_at         | 7.55           | 1.67E-08 | 1.48E-06 | 8.15              | 3.65            | Cdkn1a        |
| 1438075_at         | 7.5            | 1.87E-08 | 1.62E-06 | 6.38              | 2.34            | Fem1c         |
| 1428223_at         | 7.5            | 1.90E-08 | 1.62E-06 | 11.23             | 1.77            | Mfsd2         |
| 1448286_at         | 7.48           | 2.00E-08 | 1.68E-06 | 11.82             | 1.11            | Hsd17b10      |
| 1456395_at         | 7.44           | 2.20E-08 | 1.83E-06 | 6.98              | 2.11            | Ppargc1a      |
| 1427747_a_at       | 7.43           | 2.27E-08 | 1.87E-06 | 10.76             | 2.76            | Lcn2          |
| 1422768_at         | 7.42           | 2.35E-08 | 1.90E-06 | 9.03              | 1.36            | Syncrip       |
| 1423447_at         | 7.41           | 2.38E-08 | 1.92E-06 | 11.91             | 1.13            | Clpx          |
| 1443621_at         | 7.41           | 2.42E-08 | 1.92E-06 | 4.4               | 2.92            | Xaf1          |
| 1448456_at         | 7.39           | 2.52E-08 | 1.99E-06 | 6.95              | 1.67            | Cln8          |
| 1450505_a_at       | 7.39           | 2.56E-08 | 2.00E-06 | 8.88              | 1.83            | 1810015C04Rik |
| 1456502_at         | 7.38           | 2.64E-08 | 2.03E-06 | 5.79              | 2.36            | Dyrk2         |
| 1438391_x_at       | 7.37           | 2.66E-08 | 2.03E-06 | 11.52             | 1.24            | Hsd17b10      |
| 1436871_at         | 7.37           | 2.68E-08 | 2.04E-06 | 6.81              | 2.02            | Sfrs7         |
| 1435243_at         | 7.36           | 2.74E-08 | 2.06E-06 | 6.99              | 1.82            | Zfp746        |
| 1418780_at         | 7.35           | 2.80E-08 | 2.09E-06 | 11.05             | 1.39            | Cyp39a1       |
| 1424735_at         | 7.35           | 2.82E-08 | 2.09E-06 | 9.78              | 1.48            | Slc25a25      |
| 1418249_at         | 7.35           | 2.82E-08 | 2.09E-06 | 8.19              | 1.47            | Crcp          |
| 1425652_s_at       | 7.31           | 3.14E-08 | 2.29E-06 | 8.6               | 1.27            | Rbpms         |
| 1450522_a_at       | 7.31           | 3.16E-08 | 2.30E-06 | 9.98              | 1.15            | H1f0          |
| 1439451_x_at       | 7.3            | 3.22E-08 | 2.33E-06 | 7.5               | 1.47            | Gpr172b       |
| 1460336_at         | 7.3            | 3.26E-08 | 2.34E-06 | 7.16              | 1.93            | Ppargc1a      |
| 1442745_x_at       | 7.29           | 3.32E-08 | 2.37E-06 | 7.99              | 1.96            | NA            |
| 1458152_at         | 7.29           | 3.34E-08 | 2.37E-06 | 5.31              | 2.25            | Etfdh         |
| 1438385_s_at       | 7.28           | 3.41E-08 | 2.41E-06 | 13.01             | 1.01            | Gpt2          |
| 1442126_at         | 7.25           | 3.69E-08 | 2.57E-06 | 5.68              | 1.96            | 5830417C01Rik |
| 1428923_at         | 7.24           | 3.85E-08 | 2.67E-06 | 5.25              | 2.83            | Ppp1r3g       |
| 1422660_at         | 7.23           | 3.94E-08 | 2.70E-06 | 11.27             | 1.53            | NA            |
| 1426599_a_at       | 7.22           | 4.01E-08 | 2.73E-06 | 7.83              | 1.48            | Slc2a1        |
| 1439342_at         | 7.15           | 4.85E-08 | 3.21E-06 | 8.73              | 1.72            | Clpx          |
| 1418932_at         | 7.15           | 4.94E-08 | 3.25E-06 | 8.67              | 1.82            | Nfil3         |
| 1438313_at         | 7.13           | 5.23E-08 | 3.36E-06 | 8.34              | 1.74            | NA            |
| 1439029_at         | 7.11           | 5.41E-08 | 3.45E-06 | 9.9               | 1.16            | Gpt2          |
| 1424211_at         | 7.11           | 5.54E-08 | 3.48E-06 | 8.4               | 1.19            | Slc25a33      |
| 1449525_at         | 7.04           | 6.64E-08 | 4.02E-06 | 12.32             | 1.43            | Fmo3          |



| Probe <sup>1</sup> | t <sup>2</sup> | p-value  | q-value  | Mean <sup>3</sup> | FC <sup>4</sup> | Symbol        |
|--------------------|----------------|----------|----------|-------------------|-----------------|---------------|
| 1434542_at         | 7.04           | 6.65E-08 | 4.02E-06 | 9.7               | 1.32            | Gpt2          |
| 1428749_at         | 7              | 7.33E-08 | 4.38E-06 | 9.73              | 1.15            | Dmxi2         |
| 1449117_at         | 6.99           | 7.51E-08 | 4.41E-06 | 10.12             | 1.09            | Jund          |
| 1444036_at         | 6.98           | 7.87E-08 | 4.51E-06 | 7.03              | 1.77            | Ppp2r5a       |
| 1452418_at         | 6.98           | 7.89E-08 | 4.51E-06 | 9.67              | 1.61            | 1200016E24Rik |
| 1422570_at         | 6.97           | 7.96E-08 | 4.51E-06 | 6.99              | 1.65            | Yy1           |
| 1446147_at         | 6.97           | 7.97E-08 | 4.51E-06 | 7.49              | 1.95            | NA            |
| 1438345_at         | 6.97           | 8.09E-08 | 4.53E-06 | 6.65              | 2.33            | NA            |
| 1441915_s_at       | 6.95           | 8.42E-08 | 4.69E-06 | 12.48             | 1.53            | 2310076L09Rik |
| 1415997_at         | 6.95           | 8.52E-08 | 4.71E-06 | 9.48              | 2.09            | Txnip         |
| 1430295_at         | 6.93           | 8.96E-08 | 4.93E-06 | 6.87              | 1.48            | Gna13         |
| 1453238_s_at       | 6.92           | 9.20E-08 | 5.01E-06 | 12.94             | 0.91            | 1200016E24Rik |
| 1424942_a_at       | 6.9            | 9.73E-08 | 5.28E-06 | 6.25              | 2.59            | Myc           |
| 1455773_at         | 6.88           | 1.03E-07 | 5.48E-06 | 8.06              | 2.09            | NA            |
| 1437161_x_at       | 6.84           | 1.16E-07 | 6.03E-06 | 8.82              | 1.26            | Rbpms         |
| 1455007_s_at       | 6.82           | 1.23E-07 | 6.35E-06 | 12.19             | 1.11            | Gpt2          |
| 1444746_at         | 6.81           | 1.25E-07 | 6.37E-06 | 5.2               | 1.93            | Ptbp2         |
| 1424544_at         | 6.81           | 1.25E-07 | 6.37E-06 | 8.34              | 1.54            | Nrbp2         |
| 1433674_a_at       | 6.81           | 1.27E-07 | 6.38E-06 | 8.63              | 1.16            | Snord22       |
| 1434773_a_at       | 6.8            | 1.30E-07 | 6.51E-06 | 9.52              | 1.31            | Slc2a1        |
| 1425921_a_at       | 6.79           | 1.31E-07 | 6.53E-06 | 10.11             | 1.5             | 1810055G02Rik |
| 1420376_a_at       | 6.79           | 1.33E-07 | 6.61E-06 | 12.36             | 1.02            | H3f3b         |
| 1449039_a_at       | 6.77           | 1.41E-07 | 6.93E-06 | 9.81              | 1.07            | Hnrpd1        |
| 1426792_s_at       | 6.74           | 1.53E-07 | 7.41E-06 | 5.13              | 1.83            | Rusc2         |
| 1457915_at         | 6.73           | 1.55E-07 | 7.49E-06 | 8                 | 1.62            | 4833442J19Rik |
| 1437775_at         | 6.72           | 1.62E-07 | 7.79E-06 | 4.61              | 1.66            | Dlst          |
| 1429359_s_at       | 6.69           | 1.75E-07 | 8.26E-06 | 8.58              | 1.2             | Rbpms         |
| 1431789_s_at       | 6.68           | 1.79E-07 | 8.40E-06 | 9.55              | 1.54            | Tmed5         |
| 1440833_at         | 6.66           | 1.88E-07 | 8.71E-06 | 6.16              | 1.68            | Cdc215        |
| 1451154_a_at       | 6.66           | 1.89E-07 | 8.71E-06 | 9.01              | 1.12            | Cugbp2        |
| 1452519_a_at       | 6.65           | 1.93E-07 | 8.82E-06 | 10                | 1.75            | Zfp36         |
| 1428167_a_at       | 6.65           | 1.94E-07 | 8.82E-06 | 7.73              | 1.35            | Mpz11         |
| 1418444_a_at       | 6.64           | 2.01E-07 | 8.94E-06 | 10.76             | 1.18            | Gde1          |
| 1450061_at         | 6.64           | 2.03E-07 | 9.01E-06 | 6.59              | 2.44            | Enc1          |
| 1455725_a_at       | 6.63           | 2.06E-07 | 9.11E-06 | 12.49             | 1.05            | H3f3b         |
| 1426791_at         | 6.63           | 2.07E-07 | 9.14E-06 | 4.43              | 1.79            | Rusc2         |
| 1456875_at         | 6.62           | 2.11E-07 | 9.26E-06 | 6.48              | 1.68            | 1810013L24Rik |
| 1424574_at         | 6.61           | 2.16E-07 | 9.40E-06 | 12.26             | 1.18            | Tmed5         |
| 1417969_at         | 6.61           | 2.18E-07 | 9.42E-06 | 8.13              | 1.77            | Fbxo31        |
| 1427425_at         | 6.6            | 2.22E-07 | 9.55E-06 | 8.41              | 2.06            | 9130208E07Rik |
| 1449773_s_at       | 6.6            | 2.27E-07 | 9.67E-06 | 5.6               | 2.26            | Gadd45b       |
| 1430798_x_at       | 6.59           | 2.33E-07 | 9.92E-06 | 9.06              | 1.16            | Mrpl15        |
| 1433733_a_at       | 6.58           | 2.35E-07 | 9.94E-06 | 7.93              | 1.69            | Cry1          |
| 1444018_at         | 6.58           | 2.39E-07 | 9.99E-06 | 7.45              | 1.85            | B930098A02Rik |
| 1416592_at         | 6.57           | 2.45E-07 | 1.02E-05 | 10.49             | 1.03            | Glrx          |
| 1437553_at         | 6.57           | 2.46E-07 | 1.02E-05 | 8.03              | 1.32            | Brcc3         |
| 1442409_at         | 6.56           | 2.55E-07 | 1.05E-05 | 5.47              | 2.2             | D9Wsu90e      |
| 1421604_a_at       | 6.54           | 2.69E-07 | 1.10E-05 | 8.13              | 1.68            | Klf3          |
| 1418949_at         | 6.52           | 2.78E-07 | 1.13E-05 | 6.88              | 1.83            | Gdf15         |
| 1460172_at         | 6.51           | 2.91E-07 | 1.16E-05 | 10.2              | 0.97            | 5730403B10Rik |
| 1429639_at         | 6.51           | 2.93E-07 | 1.16E-05 | 8.31              | 1.77            | Prei4         |
| 1426452_a_at       | 6.5            | 2.97E-07 | 1.17E-05 | 10                | 1.55            | Rab30         |
| 1460290_at         | 6.49           | 3.07E-07 | 1.21E-05 | 8.69              | 1.32            | Lpin2         |

| Probe <sup>1</sup> | t <sup>2</sup> | p-value  | q-value  | Mean <sup>3</sup> | FC <sup>4</sup> | Symbol        |
|--------------------|----------------|----------|----------|-------------------|-----------------|---------------|
| 1456212_x_at       | 6.48           | 3.13E-07 | 1.22E-05 | 8.9               | 1.46            | Socs3         |
| 1444763_at         | 6.48           | 3.13E-07 | 1.22E-05 | 6.45              | 1.54            | Ptprk         |
| 1448193_at         | 6.47           | 3.25E-07 | 1.26E-05 | 9.02              | 1.2             | 5730403B10Rik |
| 1439617_s_at       | 6.46           | 3.33E-07 | 1.28E-05 | 12.78             | 0.85            | Pck1          |
| 1453384_at         | 6.44           | 3.49E-07 | 1.33E-05 | 4.69              | 1.44            | Dennd1b       |
| 1416067_at         | 6.44           | 3.53E-07 | 1.34E-05 | 9.22              | 1.84            | Ifrd1         |
| 1422513_at         | 6.43           | 3.67E-07 | 1.38E-05 | 5.21              | 1.7             | Ccnf          |
| 1454712_at         | 6.42           | 3.71E-07 | 1.40E-05 | 9.19              | 1.82            | Mcart1        |
| 1437565_a_at       | 6.42           | 3.75E-07 | 1.40E-05 | 8.99              | 0.97            | Gnl2          |
| 1416738_at         | 6.4            | 3.91E-07 | 1.45E-05 | 10.24             | 1.13            | Brap          |
| 1427540_at         | 6.4            | 3.98E-07 | 1.47E-05 | 5.56              | 1.91            | Zwint         |
| 1428010_at         | 6.33           | 4.80E-07 | 1.73E-05 | 4.53              | 1.42            | Timm9         |
| 1453287_at         | 6.32           | 4.94E-07 | 1.77E-05 | 7.81              | 1.43            | 5730557B15Rik |
| 1421709_a_at       | 6.31           | 5.03E-07 | 1.78E-05 | 9.41              | 1.25            | Fmo5          |
| 1456225_x_at       | 6.31           | 5.10E-07 | 1.80E-05 | 4.84              | 1.48            | Trib3         |
| 1433789_at         | 6.31           | 5.12E-07 | 1.81E-05 | 6.38              | 3.04            | Snhg3         |
| 1438404_at         | 6.31           | 5.17E-07 | 1.82E-05 | 7.24              | 1.54            | Rnf144a       |
| 1424683_at         | 6.3            | 5.21E-07 | 1.83E-05 | 12.67             | 1.14            | 1810015C04Rik |
| 1447644_at         | 6.3            | 5.23E-07 | 1.83E-05 | 3.26              | 1.23            | Wnt5b         |
| 1454654_at         | 6.29           | 5.39E-07 | 1.87E-05 | 8.66              | 1.16            | Dirc2         |
| 1453789_at         | 6.28           | 5.49E-07 | 1.90E-05 | 3.8               | 1.51            | 4933440N22Rik |
| 1427997_at         | 6.28           | 5.55E-07 | 1.92E-05 | 10.44             | 1.06            | 1110007M04Rik |
| 1434099_at         | 6.27           | 5.74E-07 | 1.98E-05 | 7.63              | 1.5             | Ppargc1a      |
| 1438398_at         | 6.25           | 6.01E-07 | 2.04E-05 | 7.24              | 1.53            | Rbm39         |
| 1442744_at         | 6.25           | 6.08E-07 | 2.05E-05 | 7.83              | 1.96            | NA            |
| 1437626_at         | 6.24           | 6.25E-07 | 2.08E-05 | 10.71             | 1.2             | Zfp36l2       |
| 1455958_s_at       | 6.22           | 6.54E-07 | 2.17E-05 | 9.43              | 1.19            | Pptc7         |
| 1427104_at         | 6.22           | 6.56E-07 | 2.17E-05 | 6.6               | 1.68            | Zfp612        |
| 1437751_at         | 6.21           | 6.69E-07 | 2.19E-05 | 6.18              | 1.71            | Ppargc1a      |
| 1417815_a_at       | 6.2            | 6.93E-07 | 2.26E-05 | 12.53             | 0.8             | Serinc3       |
| 1455899_x_at       | 6.2            | 6.95E-07 | 2.26E-05 | 9.29              | 1.46            | Socs3         |
| 1426356_at         | 6.19           | 7.09E-07 | 2.30E-05 | 7.56              | 1.39            | 6330578E17Rik |
| 1448448_a_at       | 6.18           | 7.35E-07 | 2.36E-05 | 10.04             | 1.09            | Chkb          |
| 1451401_a_at       | 6.16           | 7.77E-07 | 2.46E-05 | 8.94              | 1.12            | 0610009K11Rik |
| 1427033_at         | 6.15           | 7.95E-07 | 2.51E-05 | 9.1               | 1.25            | Dnmbp         |
| 1437419_at         | 6.14           | 8.14E-07 | 2.56E-05 | 7.75              | 1.37            | Bmp2k         |
| 1457724_at         | 6.14           | 8.30E-07 | 2.60E-05 | 6.7               | 1.67            | Ctsl          |
| 1431742_at         | 6.12           | 8.74E-07 | 2.71E-05 | 5.48              | 2.08            | 1810053B23Rik |
| 1452290_at         | 6.12           | 8.85E-07 | 2.74E-05 | 9.5               | 1               | Tmem106b      |
| 1423866_at         | 6.11           | 8.94E-07 | 2.74E-05 | 15.02             | 0.44            | Serpina3k     |
| 1419492_s_at       | 6.1            | 9.16E-07 | 2.80E-05 | 5.98              | 2.12            | Defb1         |
| 1429144_at         | 6.1            | 9.34E-07 | 2.84E-05 | 10.95             | 1.53            | Prei4         |
| 1416255_at         | 6.09           | 9.48E-07 | 2.87E-05 | 4.53              | 1.4             | Gja4          |
| 1427932_s_at       | 6.09           | 9.54E-07 | 2.88E-05 | 13.04             | 0.88            | 1200016E24Rik |
| 1418572_x_at       | 6.08           | 9.66E-07 | 2.91E-05 | 5.87              | 1.94            | Tnfrsf12a     |
| 1445042_at         | 6.06           | 1.03E-06 | 3.07E-05 | 5.2               | 4.07            | Aass          |
| 1422484_at         | 6.06           | 1.04E-06 | 3.07E-05 | 11.95             | 0.85            | Cyca          |
| 1418505_at         | 6.05           | 1.05E-06 | 3.10E-05 | 11.52             | 0.84            | Nudt4         |
| 1429165_at         | 6.05           | 1.07E-06 | 3.11E-05 | 6.21              | 1.4             | 3110001I22Rik |
| 1429251_at         | 6.04           | 1.08E-06 | 3.13E-05 | 7.71              | 1.33            | Prdm2         |
| 1455350_at         | 6.04           | 1.08E-06 | 3.13E-05 | 7.29              | 1.61            | Tmem62        |
| 1415996_at         | 6.04           | 1.09E-06 | 3.13E-05 | 11.41             | 1.53            | Txnip         |
| 1436181_at         | 6.04           | 1.10E-06 | 3.15E-05 | 6.65              | 1.48            | Ddef2         |

| Probe <sup>1</sup> | t <sup>2</sup> | p-value  | q-value  | Mean <sup>3</sup> | FC <sup>4</sup> | Symbol        |
|--------------------|----------------|----------|----------|-------------------|-----------------|---------------|
| 1438815_at         | 6.02           | 1.16E-06 | 3.30E-05 | 4.46              | 1.31            | Hist2h2aa2    |
| 1428224_at         | 6.01           | 1.18E-06 | 3.35E-05 | 7.68              | 1.11            | Hnrpd1        |
| 1434100_x_at       | 6              | 1.21E-06 | 3.41E-05 | 7.7               | 1.38            | Ppargc1a      |
| 1416442_at         | 6              | 1.23E-06 | 3.46E-05 | 8.23              | 1.18            | Ier2          |
| 1423386_at         | 6              | 1.24E-06 | 3.46E-05 | 9.19              | 1.03            | Psmc9         |
| 1428512_at         | 5.99           | 1.25E-06 | 3.50E-05 | 8.07              | 2.17            | Bhlhb9        |
| 1455892_x_at       | 5.98           | 1.31E-06 | 3.64E-05 | 11.47             | 1.29            | EG622147      |
| 1421679_a_at       | 5.97           | 1.32E-06 | 3.68E-05 | 4.42              | 3.39            | Cdkn1a        |
| 1435902_at         | 5.96           | 1.38E-06 | 3.83E-05 | 8.11              | 1.32            | Nudt18        |
| 1423622_a_at       | 5.93           | 1.50E-06 | 4.05E-05 | 9.46              | 1.13            | Ccn11         |
| 1435188_at         | 5.92           | 1.56E-06 | 4.20E-05 | 5.02              | 3.16            | Gm129         |
| 1427472_a_at       | 5.91           | 1.59E-06 | 4.29E-05 | 8.46              | 2.76            | C8b           |
| 1422264_s_at       | 5.89           | 1.67E-06 | 4.47E-05 | 9.69              | 1.29            | Klf9          |
| 1436753_at         | 5.89           | 1.68E-06 | 4.48E-05 | 8.1               | 1.23            | Adck5         |
| 1434239_at         | 5.88           | 1.73E-06 | 4.59E-05 | 4.76              | 1.63            | Rrp12         |
| 1456767_at         | 5.88           | 1.73E-06 | 4.59E-05 | 5.18              | 1.5             | Lrfn3         |
| 1459937_at         | 5.88           | 1.74E-06 | 4.60E-05 | 5.46              | 1.74            | Ass1          |
| 1435137_s_at       | 5.87           | 1.76E-06 | 4.65E-05 | 12.45             | 0.78            | 1200016E24Rik |
| 1442025_a_at       | 5.87           | 1.77E-06 | 4.65E-05 | 6.31              | 2.55            | NA            |
| 1418918_at         | 5.87           | 1.78E-06 | 4.67E-05 | 13.78             | 1.87            | Igfbp1        |
| 1448272_at         | 5.86           | 1.82E-06 | 4.76E-05 | 5.92              | 3.18            | Btg2          |
| 1459860_x_at       | 5.86           | 1.83E-06 | 4.78E-05 | 10.2              | 1.23            | Trim2         |
| 1447856_x_at       | 5.85           | 1.88E-06 | 4.89E-05 | 7.04              | 1.3             | Slc25a25      |
| 1425411_at         | 5.84           | 1.95E-06 | 5.02E-05 | 3.6               | 1.51            | Arl4a         |
| 1453675_at         | 5.81           | 2.10E-06 | 5.33E-05 | 5.34              | 1.83            | Slc16a10      |
| 1428909_at         | 5.79           | 2.22E-06 | 5.57E-05 | 13.35             | 0.76            | A130040M12Rik |
| 1458658_at         | 5.77           | 2.39E-06 | 5.92E-05 | 5.53              | 1.52            | NA            |
| 1439912_at         | 5.76           | 2.42E-06 | 5.96E-05 | 4.82              | 1.64            | 9430098F02Rik |
| 1428562_at         | 5.75           | 2.47E-06 | 6.06E-05 | 10.23             | 0.92            | 2210403K04Rik |
| 1441779_at         | 5.75           | 2.49E-06 | 6.11E-05 | 7.02              | 1.47            | 9530006C21Rik |
| 1442406_at         | 5.72           | 2.69E-06 | 6.54E-05 | 7.44              | 2.06            | 9230104K21Rik |
| 1453410_at         | 5.72           | 2.70E-06 | 6.54E-05 | 5.34              | 4.29            | Angptl4       |
| 1421011_at         | 5.72           | 2.74E-06 | 6.60E-05 | 7.9               | 1.41            | Hsd17b11      |
| 1434496_at         | 5.72           | 2.76E-06 | 6.61E-05 | 7.21              | 2.45            | Plk3          |
| 1457601_at         | 5.71           | 2.84E-06 | 6.78E-05 | 9.38              | 0.9             | NA            |
| 1440965_at         | 5.7            | 2.88E-06 | 6.86E-05 | 7.98              | 1.17            | Pigl          |
| 1418571_at         | 5.68           | 3.07E-06 | 7.27E-05 | 4.94              | 1.83            | Tnfrsf12a     |
| 1438739_at         | 5.68           | 3.10E-06 | 7.31E-05 | 8.2               | 1.19            | Cnbp          |
| 1436763_a_at       | 5.67           | 3.10E-06 | 7.31E-05 | 8.72              | 1.44            | Klf9          |
| 1444320_at         | 5.67           | 3.11E-06 | 7.31E-05 | 5.44              | 1.61            | Ddhd2         |
| 1437953_at         | 5.66           | 3.23E-06 | 7.56E-05 | 5.9               | 2.19            | Prei4         |
| 1440463_at         | 5.65           | 3.30E-06 | 7.70E-05 | 3.48              | 0.96            | Ngly1         |
| 1426065_a_at       | 5.65           | 3.33E-06 | 7.75E-05 | 6.58              | 1.36            | Trib3         |
| 1440536_at         | 5.65           | 3.34E-06 | 7.77E-05 | 4.29              | 1.52            | Slc22a5       |
| 1440055_at         | 5.64           | 3.43E-06 | 7.95E-05 | 4.93              | 1.89            | AI848100      |
| 1435339_at         | 5.64           | 3.43E-06 | 7.95E-05 | 6.28              | 1.32            | Kctd15        |
| 1440533_at         | 5.63           | 3.55E-06 | 8.18E-05 | 5.75              | 1.46            | Bfar          |
| 1438824_at         | 5.62           | 3.65E-06 | 8.37E-05 | 5.26              | 2.59            | Slc20a1       |
| 1421274_at         | 5.61           | 3.69E-06 | 8.42E-05 | 4.26              | 1.25            | Socs4         |
| 1449007_at         | 5.61           | 3.74E-06 | 8.49E-05 | 7.63              | 1.52            | Btg3          |
| 1442018_at         | 5.61           | 3.75E-06 | 8.49E-05 | 3.79              | 1.4             | AI426953      |
| 1437071_at         | 5.6            | 3.87E-06 | 8.67E-05 | 5.33              | 1.39            | Eif1ay        |
| 1456769_at         | 5.6            | 3.87E-06 | 8.67E-05 | 7.17              | 1.4             | Dusp3         |

| Probe <sup>1</sup> | t <sup>2</sup> | p-value  | q-value  | Mean <sup>3</sup> | FC <sup>4</sup> | Symbol        |
|--------------------|----------------|----------|----------|-------------------|-----------------|---------------|
| 1430019_a_at       | 5.59           | 3.92E-06 | 8.75E-05 | 9.84              | 0.77            | Hnrnpa1       |
| 1455197_at         | 5.59           | 3.93E-06 | 8.76E-05 | 5.48              | 1.36            | Rnd1          |
| 1455173_at         | 5.59           | 3.98E-06 | 8.85E-05 | 8.98              | 0.96            | Gspt1         |
| 1444226_at         | 5.59           | 4.00E-06 | 8.87E-05 | 3.99              | 1.75            | Foxo3a        |
| 1429273_at         | 5.58           | 4.06E-06 | 8.95E-05 | 5.39              | 2.52            | Bmper         |
| 1419491_at         | 5.57           | 4.19E-06 | 9.22E-05 | 8.16              | 2.51            | Defb1         |
| 1435753_a_at       | 5.57           | 4.24E-06 | 9.30E-05 | 8.31              | 1.18            | Nucks1        |
| 1451392_at         | 5.57           | 4.24E-06 | 9.30E-05 | 6.6               | 1.45            | Rbed1         |
| 1453591_at         | 5.56           | 4.31E-06 | 9.41E-05 | 3.97              | 1.28            | 5730437N04Rik |
| 1435031_at         | 5.56           | 4.37E-06 | 9.47E-05 | 10.43             | 1.18            | Tmem120a      |
| 1436549_a_at       | 5.55           | 4.38E-06 | 9.47E-05 | 8.76              | 0.99            | Hnrnpa1       |
| 1421376_at         | 5.55           | 4.38E-06 | 9.47E-05 | 3.48              | 1.06            | Traf6         |
| 1450332_s_at       | 5.55           | 4.39E-06 | 9.47E-05 | 11.69             | 0.89            | Fmo5          |
| 1459746_at         | 5.55           | 4.49E-06 | 9.66E-05 | 3.66              | 1.53            | R3hdm1        |
| 1421884_at         | 5.54           | 4.52E-06 | 9.71E-05 | 5.29              | 1.47            | Sos1          |
| 1424759_at         | 5.54           | 4.56E-06 | 9.77E-05 | 8.55              | 0.99            | Arrdc4        |
| 1424092_at         | 5.54           | 4.61E-06 | 9.86E-05 | 8.17              | 1.21            | Epb4.1        |
| 1453582_at         | 5.53           | 4.67E-06 | 9.95E-05 | 5.57              | 1.46            | Chka          |
| 1424716_at         | 5.53           | 4.71E-06 | 0.0001   | 12.43             | 1.44            | Retsat        |
| 1450776_at         | 5.52           | 4.79E-06 | 0.0001   | 8.86              | 1.18            | Agpat6        |
| 1440104_at         | 5.52           | 4.84E-06 | 0.0001   | 5.79              | 1.73            | Ranbp2        |
| 1424724_a_at       | 5.5            | 5.11E-06 | 0.00011  | 6.04              | 1.53            | D16Ert472e    |
| 1446316_at         | 5.49           | 5.32E-06 | 0.00011  | 8.41              | 1.88            | Lpin2         |
| 1435594_at         | 5.47           | 5.51E-06 | 0.00011  | 7.89              | 1.37            | Arl6ip2       |
| 1419093_at         | 5.47           | 5.60E-06 | 0.00012  | 14.29             | 0.67            | Tdo2          |
| 1419061_at         | 5.47           | 5.65E-06 | 0.00012  | 7.24              | 1.09            | Rhod          |
| 1423660_at         | 5.46           | 5.66E-06 | 0.00012  | 7.26              | 1.14            | Ctdsp2        |
| 1422780_at         | 5.46           | 5.67E-06 | 0.00012  | 9.54              | 0.97            | Pxmp4         |
| 1439036_a_at       | 5.46           | 5.73E-06 | 0.00012  | 10.9              | 0.89            | Atp1b1        |
| 1438408_at         | 5.45           | 5.83E-06 | 0.00012  | 7.25              | 1.34            | Ankrd56       |
| 1435007_s_at       | 5.45           | 5.90E-06 | 0.00012  | 13.69             | 0.78            | AI132487      |
| 1418323_at         | 5.45           | 5.92E-06 | 0.00012  | 4.36              | 1.74            | Fem1b         |
| 1436898_at         | 5.45           | 5.94E-06 | 0.00012  | 9.47              | 0.98            | Sfpq          |
| 1452837_at         | 5.45           | 5.94E-06 | 0.00012  | 9.85              | 1               | Lpin2         |
| 1448551_a_at       | 5.44           | 6.08E-06 | 0.00012  | 8.28              | 1.37            | Trim2         |
| 1433634_at         | 5.44           | 6.16E-06 | 0.00012  | 10.42             | 1.78            | Irf2bp2       |
| 1417028_a_at       | 5.44           | 6.16E-06 | 0.00012  | 8.73              | 1.36            | Trim2         |
| 1455770_at         | 5.43           | 6.26E-06 | 0.00013  | 12.51             | 0.95            | NA            |
| 1452426_x_at       | 5.43           | 6.34E-06 | 0.00013  | 10.3              | 1.37            | Zfp236        |
| 1449065_at         | 5.42           | 6.41E-06 | 0.00013  | 12.19             | 1.25            | Acot1         |
| 1420119_s_at       | 5.42           | 6.47E-06 | 0.00013  | 5.13              | 1.51            | AU020177      |
| 1428660_s_at       | 5.41           | 6.66E-06 | 0.00013  | 7.55              | 1.94            | Tor3a         |
| 1441328_at         | 5.39           | 6.96E-06 | 0.00014  | 4.11              | 1.65            | NA            |
| 1455133_s_at       | 5.39           | 6.98E-06 | 0.00014  | 9.35              | 0.91            | AI848100      |
| 1419181_at         | 5.39           | 7.08E-06 | 0.00014  | 8.02              | 0.98            | Zfp326        |
| 1436952_at         | 5.39           | 7.10E-06 | 0.00014  | 4.7               | 1.47            | Klf9          |
| 1453303_at         | 5.38           | 7.16E-06 | 0.00014  | 9.41              | 0.97            | Cpt1a         |
| 1433633_at         | 5.38           | 7.26E-06 | 0.00014  | 7.87              | 2.27            | Irf2bp2       |
| 1436462_at         | 5.37           | 7.33E-06 | 0.00014  | 5.94              | 1.4             | LOC626832     |
| 1448256_at         | 5.37           | 7.39E-06 | 0.00014  | 4.66              | 1.43            | Gosr1         |
| 1436507_at         | 5.37           | 7.49E-06 | 0.00014  | 7.69              | 1.43            | Irak2         |
| 1436531_at         | 5.37           | 7.52E-06 | 0.00014  | 8.3               | 1.19            | Metap2        |
| 1442528_at         | 5.36           | 7.58E-06 | 0.00014  | 4.46              | 1.21            | Xpo4          |

| Probe <sup>1</sup> | t <sup>2</sup> | p-value  | q-value | Mean <sup>3</sup> | FC <sup>4</sup> | Symbol        |
|--------------------|----------------|----------|---------|-------------------|-----------------|---------------|
| 1433757_a_at       | 5.36           | 7.60E-06 | 0.00014 | 8.37              | 0.98            | Nisch         |
| 1419583_at         | 5.36           | 7.68E-06 | 0.00014 | 10.26             | 1.04            | Cbx4          |
| 1416933_at         | 5.35           | 7.90E-06 | 0.00015 | 11.96             | 0.83            | Por           |
| 1416665_at         | 5.34           | 8.04E-06 | 0.00015 | 9.72              | 0.84            | Coq7          |
| 1422786_at         | 5.33           | 8.29E-06 | 0.00015 | 7.32              | 1.17            | Slc30a1       |
| 1440373_at         | 5.33           | 8.37E-06 | 0.00016 | 5.08              | 1.4             | Elavl1        |
| 1456727_a_at       | 5.33           | 8.38E-06 | 0.00016 | 8.49              | 0.92            | Csnk1d        |
| 1441354_at         | 5.32           | 8.63E-06 | 0.00016 | 3.96              | 1.12            | AU018740      |
| 1460672_at         | 5.31           | 8.81E-06 | 0.00016 | 6.52              | 1.44            | 2410002F23Rik |
| 1436544_at         | 5.31           | 8.88E-06 | 0.00016 | 4.4               | 1.72            | Atp10d        |
| 1455457_at         | 5.3            | 8.96E-06 | 0.00016 | 11.02             | 1.66            | Cyp2c54       |
| 1431630_a_at       | 5.3            | 9.19E-06 | 0.00017 | 6.03              | 1.48            | Klf3          |
| 1455912_x_at       | 5.29           | 9.40E-06 | 0.00017 | 7.19              | 1.2             | Unc45a        |
| 1425774_at         | 5.28           | 9.56E-06 | 0.00017 | 4.34              | 1.57            | 1500001A10Rik |
| 1444518_at         | 5.28           | 9.75E-06 | 0.00018 | 6.2               | 1.76            | Acox1         |
| 1415899_at         | 5.27           | 9.79E-06 | 0.00018 | 6.19              | 1.46            | Junb          |
| 1429337_at         | 5.27           | 9.88E-06 | 0.00018 | 6.62              | 1.34            | Tmem87b       |
| 1428273_at         | 5.27           | 1.00E-05 | 0.00018 | 7.82              | 1.06            | Abhd13        |
| 1438089_a_at       | 5.27           | 1.00E-05 | 0.00018 | 9.08              | 1               | Bclaf1        |
| 1448654_at         | 5.26           | 1.01E-05 | 0.00018 | 9.93              | 0.85            | Mtch2         |
| 1436695_x_at       | 5.25           | 1.04E-05 | 0.00018 | 7.91              | 1.1             | Rbed1         |
| 1460573_at         | 5.25           | 1.04E-05 | 0.00018 | 8.68              | 1.05            | AI848100      |
| 1427200_at         | 5.25           | 1.05E-05 | 0.00018 | 9.46              | 0.77            | Zranb1        |
| 1460241_a_at       | 5.25           | 1.06E-05 | 0.00019 | 10.91             | 1.2             | St3gal5       |
| 1450069_a_at       | 5.24           | 1.08E-05 | 0.00019 | 9.16              | 0.9             | Cugbp2        |
| 1425933_a_at       | 5.24           | 1.09E-05 | 0.00019 | 7.71              | 1.3             | Nt5c2         |
| 1450971_at         | 5.24           | 1.09E-05 | 0.00019 | 7.39              | 1.72            | Gadd45b       |
| 1444952_a_at       | 5.24           | 1.09E-05 | 0.00019 | 10.26             | 0.85            | Nucks1        |
| 1450014_at         | 5.23           | 1.10E-05 | 0.00019 | 5.64              | 1.24            | Cldn1         |
| 1422483_a_at       | 5.23           | 1.10E-05 | 0.00019 | 12.81             | 0.74            | Cycc          |
| 1438979_s_at       | 5.23           | 1.10E-05 | 0.00019 | 6.38              | 1.64            | 1700029I15Rik |
| 1456390_at         | 5.23           | 1.12E-05 | 0.00019 | 9.59              | 0.89            | Ppp2ca        |
| 1435870_at         | 5.23           | 1.12E-05 | 0.00019 | 8.3               | 1.09            | Sycp3         |
| 1427271_at         | 5.22           | 1.13E-05 | 0.00019 | 8.4               | 1.04            | Zbtb44        |
| 1421935_at         | 5.22           | 1.14E-05 | 0.00019 | 4.09              | 1.22            | Rps20         |
| 1424828_a_at       | 5.22           | 1.14E-05 | 0.00019 | 12.39             | 0.76            | Fh1           |
| 1425624_at         | 5.21           | 1.16E-05 | 0.0002  | 3.8               | 1.3             | Epm2aip1      |
| 1421031_a_at       | 5.21           | 1.17E-05 | 0.0002  | 5.75              | 2.4             | 2310016C08Rik |
| 1436934_s_at       | 5.21           | 1.18E-05 | 0.0002  | 11.25             | 0.82            | Aco2          |
| 1436555_at         | 5.2            | 1.20E-05 | 0.0002  | 12.16             | 0.81            | Slc7a2        |
| 1451621_at         | 5.19           | 1.25E-05 | 0.00021 | 7.94              | 1.02            | 5830417C01Rik |
| 1448700_at         | 5.17           | 1.31E-05 | 0.00022 | 12.04             | 1.29            | G0s2          |
| 1455936_a_at       | 5.17           | 1.32E-05 | 0.00022 | 8.46              | 1.09            | Rbpms         |
| 1431166_at         | 5.17           | 1.33E-05 | 0.00022 | 6.2               | 1.4             | Chd1          |
| 1449945_at         | 5.16           | 1.35E-05 | 0.00022 | 5.99              | 1.45            | Ppargc1b      |
| 1438250_s_at       | 5.16           | 1.36E-05 | 0.00022 | 11.23             | 0.76            | LOC545600     |
| 1429900_at         | 5.16           | 1.36E-05 | 0.00022 | 8.07              | 1.48            | 5330406M23Rik |
| 1443969_at         | 5.16           | 1.37E-05 | 0.00022 | 4.62              | 1.2             | Irs2          |
| 1446068_at         | 5.15           | 1.39E-05 | 0.00023 | 9.29              | 0.82            | Adk           |
| 1444418_at         | 5.15           | 1.41E-05 | 0.00023 | 4.32              | 1.22            | Itpr2         |
| 1419068_at         | 5.15           | 1.41E-05 | 0.00023 | 8.85              | 1.02            | Rabgef1       |
| 1428844_a_at       | 5.14           | 1.43E-05 | 0.00023 | 8.59              | 0.88            | Bclaf1        |
| 1425020_at         | 5.13           | 1.48E-05 | 0.00024 | 10.74             | 0.84            | Ubx4d         |

| Probe <sup>1</sup> | t <sup>2</sup> | p-value  | q-value | Mean <sup>3</sup> | FC <sup>4</sup> | Symbol        |
|--------------------|----------------|----------|---------|-------------------|-----------------|---------------|
| 1452858_at         | 5.13           | 1.50E-05 | 0.00024 | 4.81              | 1.33            | Elavl1        |
| 1446110_at         | 5.13           | 1.50E-05 | 0.00024 | 4.26              | 1.54            | D3Erttd711e   |
| 1438131_at         | 5.12           | 1.54E-05 | 0.00025 | 5.17              | 1.3             | Fbxw2         |
| 1435483_x_at       | 5.11           | 1.55E-05 | 0.00025 | 7.58              | 1.15            | Slc25a32      |
| 1455438_at         | 5.11           | 1.56E-05 | 0.00025 | 9.62              | 1.03            | Pxmp4         |
| 1459959_at         | 5.11           | 1.57E-05 | 0.00025 | 5.15              | 1.9             | Gldc          |
| 1448382_at         | 5.1            | 1.61E-05 | 0.00025 | 14.27             | 1.05            | Ehhadh        |
| 1451371_at         | 5.1            | 1.62E-05 | 0.00025 | 10.02             | 0.89            | Mrap          |
| 1418148_at         | 5.1            | 1.62E-05 | 0.00025 | 5.05              | 1.22            | Abhd1         |
| 1420722_at         | 5.09           | 1.66E-05 | 0.00026 | 5.64              | 1.74            | Elov13        |
| 1432007_s_at       | 5.09           | 1.67E-05 | 0.00026 | 6.4               | 1.65            | Ap2a2         |
| 1429473_at         | 5.08           | 1.69E-05 | 0.00026 | 8.53              | 0.82            | 1200003I07Rik |
| 1417835_at         | 5.08           | 1.70E-05 | 0.00026 | 12.92             | 1.2             | Mug1          |
| 1435171_at         | 5.08           | 1.72E-05 | 0.00027 | 6.12              | 1.37            | LOC100040353  |
| 1418250_at         | 5.07           | 1.77E-05 | 0.00027 | 8.63              | 1.4             | Arl4d         |
| 1434087_at         | 5.06           | 1.80E-05 | 0.00028 | 6.56              | 1.34            | Mthfr         |
| 1438922_x_at       | 5.06           | 1.82E-05 | 0.00028 | 11.11             | 0.7             | Slc25a5       |
| 1431086_s_at       | 5.06           | 1.83E-05 | 0.00028 | 8.32              | 0.87            | Pcmt1         |
| 1452836_at         | 5.05           | 1.84E-05 | 0.00028 | 11.08             | 0.88            | Lpin2         |
| 1449089_at         | 5.05           | 1.85E-05 | 0.00028 | 8.97              | 0.85            | Nrip1         |
| 1421365_at         | 5.05           | 1.88E-05 | 0.00028 | 3.86              | 1.5             | Fst           |
| 1456080_a_at       | 5.04           | 1.89E-05 | 0.00029 | 10.31             | 0.92            | Serinc3       |
| 1428942_at         | 5.04           | 1.89E-05 | 0.00029 | 12.78             | 1.21            | Mt2           |
| 1429671_at         | 5.04           | 1.90E-05 | 0.00029 | 3.67              | 1.09            | 2410018M08Rik |
| 1438156_x_at       | 5.04           | 1.90E-05 | 0.00029 | 10.73             | 0.78            | Cpt1a         |
| 1450703_at         | 5.04           | 1.90E-05 | 0.00029 | 7.53              | 1.04            | Slc7a2        |
| 1447109_at         | 5.04           | 1.94E-05 | 0.00029 | 5.88              | 1.32            | Elavl1        |
| 1418889_a_at       | 5.03           | 1.96E-05 | 0.00029 | 5.91              | 1.2             | Csnk1d        |
| 1428682_at         | 5.03           | 1.96E-05 | 0.00029 | 4.91              | 1.19            | Zc3h6         |
| 1455634_at         | 5.03           | 1.96E-05 | 0.00029 | 7.55              | 1.06            | NA            |
| 1422656_at         | 5.02           | 2.01E-05 | 0.0003  | 5.7               | 1.31            | Ras12-9       |
| 1448678_at         | 5.02           | 2.02E-05 | 0.0003  | 5.43              | 1.34            | 3110048E14Rik |
| 1439316_at         | 5.02           | 2.06E-05 | 0.0003  | 5.91              | 1.16            | Rbm39         |
| 1454703_x_at       | 5.01           | 2.07E-05 | 0.0003  | 5.5               | 1.22            | Snhg1         |
| 1441943_x_at       | 5.01           | 2.09E-05 | 0.00031 | 7.57              | 1.04            | Ciapi1        |
| 1437381_x_at       | 5.01           | 2.10E-05 | 0.00031 | 7.76              | 1.04            | Gpr172b       |
| 1434642_at         | 4.99           | 2.18E-05 | 0.00032 | 12.14             | 0.83            | Hsd17b11      |
| 1437658_a_at       | 4.99           | 2.19E-05 | 0.00032 | 5.93              | 1.24            | Snord22       |
| 1456341_a_at       | 4.98           | 2.28E-05 | 0.00033 | 12.96             | 0.9             | Klf9          |
| 1446001_at         | 4.98           | 2.28E-05 | 0.00033 | 5.12              | 1.61            | Reps1         |
| 1426146_a_at       | 4.98           | 2.30E-05 | 0.00034 | 9.68              | 0.95            | Chpt1         |
| 1434487_at         | 4.97           | 2.35E-05 | 0.00034 | 8.21              | 0.94            | Mef2d         |
| 1446269_at         | 4.97           | 2.36E-05 | 0.00034 | 4.11              | 1.23            | Hbp1          |
| 1429486_at         | 4.97           | 2.37E-05 | 0.00034 | 4.81              | 1.14            | Pfkfb2        |
| 1442465_s_at       | 4.96           | 2.38E-05 | 0.00034 | 8.7               | 0.9             | Strbp         |
| 1443167_at         | 4.96           | 2.39E-05 | 0.00035 | 4.3               | 1.88            | Rnf12         |
| 1444281_at         | 4.96           | 2.40E-05 | 0.00035 | 3.67              | 0.96            | Camk2d        |
| 1442258_at         | 4.96           | 2.41E-05 | 0.00035 | 6.63              | 2.29            | NA            |
| 1442424_at         | 4.96           | 2.42E-05 | 0.00035 | 6.17              | 1.27            | Ctdspl2       |
| 1433675_at         | 4.96           | 2.43E-05 | 0.00035 | 8.1               | 0.9             | Snord22       |
| 1427029_at         | 4.95           | 2.46E-05 | 0.00035 | 2.64              | 0.69            | Htra3         |
| 1438675_at         | 4.95           | 2.46E-05 | 0.00035 | 6.67              | 1.17            | Sfrs8         |
| 1435020_at         | 4.95           | 2.47E-05 | 0.00035 | 9.22              | 0.8             | Sdccag1       |

| Probe <sup>1</sup> | t <sup>2</sup> | p-value  | q-value | Mean <sup>3</sup> | FC <sup>4</sup> | Symbol        |
|--------------------|----------------|----------|---------|-------------------|-----------------|---------------|
| 1428653_x_at       | 4.95           | 2.50E-05 | 0.00035 | 3.68              | 1.4             | Elavl1        |
| 1432181_s_at       | 4.95           | 2.50E-05 | 0.00035 | 10.9              | 0.75            | Sco2          |
| 1427820_at         | 4.95           | 2.50E-05 | 0.00035 | 7.23              | 1.42            | NA            |
| 1451566_at         | 4.94           | 2.52E-05 | 0.00036 | 5.6               | 1.39            | Zfp810        |
| 1417559_at         | 4.94           | 2.52E-05 | 0.00036 | 10.54             | 0.9             | Sfxn1         |
| 1432646_a_at       | 4.94           | 2.54E-05 | 0.00036 | 5.73              | 1.75            | 2900097C17Rik |
| 1456091_at         | 4.94           | 2.56E-05 | 0.00036 | 5.54              | 1.39            | Sec22c        |
| 1437924_at         | 4.93           | 2.60E-05 | 0.00037 | 6.46              | 1.24            | Son           |
| 1428529_at         | 4.93           | 2.63E-05 | 0.00037 | 6.79              | 1.38            | 2810026P18Rik |
| 1425185_at         | 4.91           | 2.74E-05 | 0.00038 | 8.94              | 0.85            | 5830417C01Rik |
| 1452214_at         | 4.91           | 2.76E-05 | 0.00038 | 10.27             | 0.78            | Skil          |
| 1417820_at         | 4.91           | 2.78E-05 | 0.00039 | 8.55              | 1.07            | Tor1b         |
| 1449363_at         | 4.91           | 2.79E-05 | 0.00039 | 5.68              | 2.17            | Atf3          |
| 1455357_x_at       | 4.91           | 2.80E-05 | 0.00039 | 12.29             | 0.64            | LOC100043869  |
| 1421848_at         | 4.91           | 2.80E-05 | 0.00039 | 8.72              | 1.4             | Slc22a5       |
| 1436931_at         | 4.9            | 2.84E-05 | 0.00039 | 8.9               | 0.88            | Rfx4          |
| 1415779_s_at       | 4.9            | 2.85E-05 | 0.00039 | 12.64             | 0.84            | Actg1         |
| 1423257_at         | 4.9            | 2.86E-05 | 0.00039 | 14.24             | 0.79            | Cyp4a14       |
| 1436200_at         | 4.9            | 2.88E-05 | 0.00039 | 5.66              | 1.35            | Lonrf3        |
| 1419365_at         | 4.9            | 2.88E-05 | 0.00039 | 11.47             | 1.06            | Pex11a        |
| 1438055_at         | 4.9            | 2.90E-05 | 0.00039 | 8.4               | 1.74            | Rarres1       |
| 1443500_at         | 4.89           | 2.92E-05 | 0.0004  | 6.96              | 1.13            | Mllt10        |
| 1460249_at         | 4.89           | 2.92E-05 | 0.0004  | 8                 | 1.2             | Ln timer      |
| 1419874_x_at       | 4.89           | 2.98E-05 | 0.0004  | 5.11              | 1.7             | Zbtb16        |
| 1420981_a_at       | 4.88           | 3.01E-05 | 0.0004  | 6.63              | 1.36            | Lmo4          |
| 1435333_at         | 4.88           | 3.01E-05 | 0.0004  | 9.34              | 0.85            | 1110007M04Rik |
| 1436023_at         | 4.88           | 3.06E-05 | 0.00041 | 7.82              | 1.04            | Bclaf1        |
| 1451310_a_at       | 4.88           | 3.06E-05 | 0.00041 | 13.38             | 0.6             | Ctsl          |
| 1451285_at         | 4.86           | 3.17E-05 | 0.00042 | 10.57             | 0.68            | Fus           |
| 1417560_at         | 4.86           | 3.17E-05 | 0.00042 | 10.6              | 0.87            | Sfxn1         |
| 1441189_at         | 4.86           | 3.19E-05 | 0.00042 | 2.84              | 1.18            | NA            |
| 1424951_at         | 4.86           | 3.20E-05 | 0.00043 | 9.42              | 1               | Baiap211      |
| 1424138_at         | 4.86           | 3.22E-05 | 0.00043 | 5.33              | 1.28            | Rhbdf1        |
| 1441765_at         | 4.86           | 3.24E-05 | 0.00043 | 10.53             | 0.75            | NA            |
| 1420405_at         | 4.85           | 3.28E-05 | 0.00043 | 11.63             | 0.83            | Slco1a4       |
| 1433758_at         | 4.85           | 3.31E-05 | 0.00044 | 6.86              | 1.1             | Nisch         |
| 1434202_a_at       | 4.85           | 3.34E-05 | 0.00044 | 3.09              | 1.18            | BC055107      |
| 1415771_at         | 4.84           | 3.44E-05 | 0.00045 | 11.49             | 0.66            | Ncl           |
| 1440267_at         | 4.84           | 3.44E-05 | 0.00045 | 5.87              | 1.48            | Pex1          |
| 1437979_at         | 4.83           | 3.47E-05 | 0.00045 | 3.89              | 1.05            | Zcchc2        |
| 1447924_at         | 4.83           | 3.49E-05 | 0.00046 | 6.12              | 1.32            | Nucks1        |
| 1430377_at         | 4.83           | 3.52E-05 | 0.00046 | 4.98              | 1.18            | 1300015D01Rik |
| 1428168_at         | 4.82           | 3.56E-05 | 0.00046 | 4.77              | 1.29            | Mpzi1         |
| 1423799_at         | 4.82           | 3.60E-05 | 0.00047 | 12.25             | 0.7             | Eif1          |
| 1417027_at         | 4.82           | 3.63E-05 | 0.00047 | 9.34              | 1.11            | Trim2         |
| 1426018_a_at       | 4.81           | 3.65E-05 | 0.00047 | 3.74              | 0.99            | Sox6          |
| 1423531_a_at       | 4.8            | 3.76E-05 | 0.00048 | 9.19              | 0.93            | Hnrnpa1       |
| 1423192_at         | 4.8            | 3.77E-05 | 0.00048 | 7.03              | 1.21            | Pspc1         |
| 1451313_a_at       | 4.8            | 3.80E-05 | 0.00048 | 10.17             | 0.74            | 1110067D22Rik |
| 1451002_at         | 4.8            | 3.81E-05 | 0.00049 | 11.38             | 0.78            | Aco2          |
| 1448830_at         | 4.8            | 3.82E-05 | 0.00049 | 10.5              | 1.37            | Dusp1         |
| 1456706_at         | 4.8            | 3.82E-05 | 0.00049 | 4.92              | 1.39            | 4833441D16Rik |
| 1449198_a_at       | 4.8            | 3.83E-05 | 0.00049 | 10.03             | 1.16            | St3gal5       |

| Probe <sup>1</sup> | t <sup>2</sup> | p-value  | q-value | Mean <sup>3</sup> | FC <sup>4</sup> | Symbol        |
|--------------------|----------------|----------|---------|-------------------|-----------------|---------------|
| 1422621_at         | 4.79           | 3.88E-05 | 0.00049 | 9.48              | 0.73            | Ranbp2        |
| 1431244_s_at       | 4.79           | 3.91E-05 | 0.00049 | 4.03              | 1.03            | Dnmbp         |
| 1447550_at         | 4.79           | 3.97E-05 | 0.0005  | 4.24              | 1.17            | EG666892      |
| 1416505_at         | 4.78           | 4.00E-05 | 0.0005  | 6.72              | 2.63            | Nr4a1         |
| 1460606_at         | 4.78           | 4.00E-05 | 0.0005  | 13.39             | 0.73            | Hsd17b13      |
| 1421151_a_at       | 4.78           | 4.00E-05 | 0.0005  | 6.65              | 1.27            | Epha2         |
| 1424456_at         | 4.78           | 4.01E-05 | 0.0005  | 7.48              | 1               | Pvrl2         |
| 1424528_at         | 4.78           | 4.03E-05 | 0.0005  | 4.67              | 1.62            | Cgref1        |
| 1439804_at         | 4.78           | 4.03E-05 | 0.0005  | 3.38              | 0.9             | 2310015A10Rik |
| 1431011_at         | 4.77           | 4.09E-05 | 0.0005  | 7.12              | 1.23            | Dlst          |
| 1429814_at         | 4.77           | 4.13E-05 | 0.00051 | 5.11              | 1.43            | Pank1         |
| 1428288_at         | 4.76           | 4.22E-05 | 0.00052 | 12.28             | 0.84            | 2310051E17Rik |
| 1437937_at         | 4.76           | 4.23E-05 | 0.00052 | 5.95              | 1.16            | Ccbp2         |
| 1427347_s_at       | 4.76           | 4.26E-05 | 0.00052 | 12.55             | 0.67            | Tubb2a        |
| 1424312_at         | 4.75           | 4.39E-05 | 0.00053 | 6.88              | 1.22            | Adipor1       |
| 1435640_x_at       | 4.75           | 4.42E-05 | 0.00054 | 10.68             | 0.67            | A130040M12Rik |
| 1430145_at         | 4.75           | 4.45E-05 | 0.00054 | 6.01              | 1.1             | Lrrc28        |
| 1422560_at         | 4.74           | 4.46E-05 | 0.00054 | 9.07              | 0.78            | Rsc1a1        |
| 1460417_at         | 4.74           | 4.47E-05 | 0.00054 | 4.97              | 1.24            | AB041803      |
| 1449337_at         | 4.74           | 4.54E-05 | 0.00055 | 12.2              | 0.86            | Tdo2          |
| 1457438_at         | 4.74           | 4.57E-05 | 0.00055 | 3.74              | 1.23            | NA            |
| 1427539_a_at       | 4.73           | 4.62E-05 | 0.00055 | 9.17              | 0.95            | Zwint         |
| 1422997_s_at       | 4.72           | 4.72E-05 | 0.00056 | 12.01             | 1.34            | Acot2         |
| 1427357_at         | 4.72           | 4.73E-05 | 0.00056 | 8.11              | 1.02            | Cda           |
| 1422615_at         | 4.72           | 4.85E-05 | 0.00058 | 4.97              | 1.29            | Map4k4        |
| 1452653_at         | 4.71           | 4.86E-05 | 0.00058 | 10.46             | 0.82            | Slc25a22      |
| 1419523_at         | 4.71           | 4.95E-05 | 0.00059 | 11.79             | 0.74            | Cyp3a13       |
| 1428440_at         | 4.71           | 4.97E-05 | 0.00059 | 8.8               | 0.88            | Slc25a12      |
| 1439200_x_at       | 4.7            | 5.03E-05 | 0.00059 | 8                 | 1.12            | Erdr1         |
| 1444333_at         | 4.7            | 5.04E-05 | 0.00059 | 4.11              | 1.07            | NA            |
| 1427798_x_at       | 4.7            | 5.11E-05 | 0.0006  | 4.37              | 1.16            | NA            |
| 1440302_at         | 4.7            | 5.12E-05 | 0.0006  | 5.94              | 1.3             | Slc25a3       |
| 1438360_x_at       | 4.7            | 5.14E-05 | 0.0006  | 11.98             | 0.63            | Slc25a5       |
| 1444531_at         | 4.69           | 5.21E-05 | 0.00061 | 8.83              | 0.76            | Sod2          |
| 1431214_at         | 4.68           | 5.31E-05 | 0.00062 | 6.93              | 2.01            | LOC67527      |
| 1441150_x_at       | 4.68           | 5.34E-05 | 0.00062 | 7.51              | 1.02            | NA            |
| 1451286_s_at       | 4.68           | 5.41E-05 | 0.00063 | 9.36              | 0.76            | Fus           |
| 1444695_at         | 4.67           | 5.47E-05 | 0.00063 | 3.59              | 0.86            | NA            |
| 1458308_at         | 4.67           | 5.49E-05 | 0.00063 | 3.64              | 1.03            | Sbno2         |
| 1418328_at         | 4.67           | 5.53E-05 | 0.00064 | 4.43              | 1.59            | Cpt1b         |
| 1423080_at         | 4.67           | 5.55E-05 | 0.00064 | 10.42             | 0.71            | Tomm20        |
| 1418335_a_at       | 4.67           | 5.57E-05 | 0.00064 | 7.8               | 0.97            | RP23-143A14.5 |
| 1423147_at         | 4.67           | 5.57E-05 | 0.00064 | 14.4              | 0.47            | Mat1a         |
| 1435534_a_at       | 4.66           | 5.62E-05 | 0.00064 | 11.13             | 0.62            | LOC100043869  |
| 1455305_x_at       | 4.66           | 5.63E-05 | 0.00064 | 9.21              | 0.72            | Hnrnpa1       |
| 1460011_at         | 4.66           | 5.66E-05 | 0.00065 | 4.77              | 2.13            | Cyp26b1       |
| 1460607_at         | 4.65           | 5.78E-05 | 0.00066 | 7.74              | 1.07            | Igsf11        |
| 1424457_at         | 4.65           | 5.78E-05 | 0.00066 | 5.12              | 1.25            | Apbb3         |
| 1453149_at         | 4.65           | 5.78E-05 | 0.00066 | 8.39              | 0.8             | Slc25a32      |
| 1419549_at         | 4.64           | 6.03E-05 | 0.00068 | 14.17             | 0.46            | Arg1          |
| 1436506_a_at       | 4.64           | 6.05E-05 | 0.00068 | 10.42             | 0.68            | Snhg6         |
| 1430686_at         | 4.64           | 6.06E-05 | 0.00068 | 4.14              | 1.24            | 4833418N02Rik |
| 1422470_at         | 4.64           | 6.07E-05 | 0.00068 | 12.89             | 0.72            | Snip3         |



| Probe <sup>1</sup> | t <sup>2</sup> | p-value  | q-value | Mean <sup>3</sup> | FC <sup>4</sup> | Symbol        |
|--------------------|----------------|----------|---------|-------------------|-----------------|---------------|
| 1434660_at         | 4.64           | 6.09E-05 | 0.00068 | 5.04              | 1.29            | Alkbh1        |
| 1442102_at         | 4.63           | 6.11E-05 | 0.00068 | 3.99              | 1.19            | Polr3h        |
| 1416239_at         | 4.63           | 6.12E-05 | 0.00068 | 13.77             | 0.54            | Ass1          |
| 1448802_at         | 4.63           | 6.15E-05 | 0.00069 | 7.13              | 0.93            | Nufip1        |
| 1419518_at         | 4.63           | 6.24E-05 | 0.00069 | 4.11              | 1.04            | Tuba8         |
| 1429778_at         | 4.63           | 6.24E-05 | 0.00069 | 8.69              | 0.85            | Optn          |
| 1424943_at         | 4.62           | 6.27E-05 | 0.0007  | 8.41              | 1.15            | Cyp4a31       |
| 1441274_at         | 4.62           | 6.36E-05 | 0.0007  | 4.52              | 1.11            | 4121402D02Rik |
| 1447923_at         | 4.62           | 6.37E-05 | 0.0007  | 9.42              | 0.7             | 1810026B05Rik |
| 1430978_at         | 4.62           | 6.45E-05 | 0.00071 | 5.24              | 1.15            | Rps25         |
| 1439169_at         | 4.61           | 6.54E-05 | 0.00072 | 4.99              | 1.38            | Eif4enif1     |
| 1435458_at         | 4.61           | 6.55E-05 | 0.00072 | 6.76              | 1.1             | Pim1          |
| 1438307_at         | 4.6            | 6.66E-05 | 0.00073 | 3.89              | 1.25            | Hmgb2         |
| 1426600_at         | 4.6            | 6.66E-05 | 0.00073 | 5.79              | 1.13            | Slc2a1        |
| 1423079_a_at       | 4.59           | 6.89E-05 | 0.00074 | 13.17             | 0.59            | Tomm20        |
| 1427352_at         | 4.59           | 6.96E-05 | 0.00075 | 3.24              | 0.84            | Krt79         |
| 1419766_at         | 4.59           | 6.97E-05 | 0.00075 | 4.46              | 1.2             | Snf1lk        |
| 1455550_x_at       | 4.58           | 7.09E-05 | 0.00076 | 13.53             | 0.55            | Serinc3       |
| 1419067_a_at       | 4.58           | 7.15E-05 | 0.00076 | 7.58              | 0.97            | Rabgef1       |
| 1449322_at         | 4.58           | 7.20E-05 | 0.00077 | 12.33             | 0.64            | Ptp4a1        |
| 1420592_a_at       | 4.57           | 7.26E-05 | 0.00077 | 9.16              | 0.79            | Anp32e        |
| 1417290_at         | 4.57           | 7.40E-05 | 0.00078 | 13.42             | 0.68            | Lrg1          |
| 1452170_at         | 4.57           | 7.42E-05 | 0.00078 | 6.04              | 1.15            | 2010209O12Rik |
| 1416739_a_at       | 4.56           | 7.50E-05 | 0.00079 | 7.11              | 1.32            | Brp           |
| 1436001_at         | 4.56           | 7.51E-05 | 0.00079 | 5.01              | 1.22            | 2310028O11Rik |
| 1428544_at         | 4.56           | 7.54E-05 | 0.00079 | 9.54              | 0.74            | 0610007L01Rik |
| 1426515_a_at       | 4.56           | 7.59E-05 | 0.00079 | 9.99              | 0.72            | Tor1a         |
| 1455434_a_at       | 4.55           | 7.66E-05 | 0.0008  | 8.81              | 0.84            | Ktn1          |
| 1435198_at         | 4.55           | 7.67E-05 | 0.0008  | 7.12              | 0.88            | LOC545228     |
| 1459897_a_at       | 4.55           | 7.70E-05 | 0.0008  | 4.68              | 1.21            | Sbsn          |
| 1449107_at         | 4.55           | 7.72E-05 | 0.0008  | 10.36             | 0.67            | Nudt4         |
| 1435432_at         | 4.55           | 7.77E-05 | 0.00081 | 5.22              | 1.03            | Centg2        |
| 1434350_at         | 4.55           | 7.78E-05 | 0.00081 | 5.88              | 1.71            | Axud1         |
| 1454793_x_at       | 4.55           | 7.79E-05 | 0.00081 | 11.55             | 0.64            | Ddx5          |
| 1442414_at         | 4.54           | 7.96E-05 | 0.00082 | 4.44              | 0.96            | Rnf103        |
| 1440225_at         | 4.54           | 7.97E-05 | 0.00082 | 7.52              | 1.13            | Gpr116        |
| 1451065_a_at       | 4.54           | 8.05E-05 | 0.00083 | 9.97              | 0.67            | Ddx39         |
| 1443807_x_at       | 4.54           | 8.08E-05 | 0.00083 | 4.16              | 1.16            | Ccnf          |
| 1439539_at         | 4.54           | 8.10E-05 | 0.00083 | 6.51              | 1.17            | Tram2         |
| 1455345_at         | 4.53           | 8.16E-05 | 0.00083 | 6.25              | 1.29            | Phf15         |
| 1454159_a_at       | 4.53           | 8.19E-05 | 0.00083 | 12.94             | 0.64            | Igfbp2        |
| 1440123_at         | 4.53           | 8.25E-05 | 0.00084 | 4.13              | 1.42            | NA            |
| 1451069_at         | 4.53           | 8.26E-05 | 0.00084 | 9.42              | 1.72            | Pim3          |
| 1441976_at         | 4.53           | 8.28E-05 | 0.00084 | 6                 | 1.34            | 5430434G16Rik |
| 1424715_at         | 4.52           | 8.39E-05 | 0.00085 | 13.28             | 0.91            | Retsat        |
| 1416911_a_at       | 4.52           | 8.54E-05 | 0.00086 | 9.62              | 0.66            | 6330407G11Rik |
| 1442014_at         | 4.51           | 8.58E-05 | 0.00086 | 5.9               | 1.92            | Ifrd1         |
| 1459615_at         | 4.51           | 8.68E-05 | 0.00087 | 4.52              | 1.06            | B130052P14Rik |
| 1453332_at         | 4.51           | 8.72E-05 | 0.00087 | 7.51              | 1.16            | 2410002O22Rik |
| 1423470_at         | 4.5            | 8.87E-05 | 0.00088 | 8.76              | 0.76            | Ptbp2         |
| 1426118_a_at       | 4.5            | 8.89E-05 | 0.00089 | 8.79              | 0.78            | Tomm40        |
| 1452610_at         | 4.5            | 8.90E-05 | 0.00089 | 4.98              | 1.18            | Zkscan14      |
| 1457264_at         | 4.5            | 9.07E-05 | 0.0009  | 7.72              | 1.11            | Phf20l1       |

| Probe <sup>1</sup> | t <sup>2</sup> | p-value  | q-value | Mean <sup>3</sup> | FC <sup>4</sup> | Symbol        |
|--------------------|----------------|----------|---------|-------------------|-----------------|---------------|
| 1429477_at         | 4.49           | 9.33E-05 | 0.00092 | 4.54              | 0.99            | Ncaph2        |
| 1435881_at         | 4.48           | 9.38E-05 | 0.00093 | 7.49              | 0.98            | Map3k12       |
| 1415930_a_at       | 4.48           | 9.49E-05 | 0.00094 | 11.88             | 0.63            | Map1lc3b      |
| 1428289_at         | 4.48           | 9.55E-05 | 0.00094 | 11.53             | 0.89            | 2310051E17Rik |
| 1429092_at         | 4.47           | 9.65E-05 | 0.00095 | 9.27              | 0.73            | Vkorc111      |
| 1451263_a_at       | 4.47           | 9.68E-05 | 0.00095 | 7.73              | 1.22            | Fabp4         |
| 1425518_at         | 4.47           | 9.84E-05 | 0.00096 | 10.76             | 0.68            | Rapgef4       |
| 1441233_at         | 4.46           | 9.98E-05 | 0.00098 | 7.59              | 0.95            | Srp54a        |
| 1419103_a_at       | 4.46           | 9.99E-05 | 0.00098 | 10.79             | 0.87            | Abhd6         |
| 1424676_s_at       | 4.46           | 0.0001   | 0.00098 | 9.79              | 0.76            | Sec14I4       |
| 1453054_at         | 4.46           | 0.0001   | 0.00098 | 5.26              | 1.07            | Scamp1        |
| 1454665_at         | 4.46           | 0.0001   | 0.00098 | 5.62              | 1.88            | Irf2bp2       |
| 1445574_at         | 4.45           | 0.0001   | 0.00099 | 7.24              | 1.26            | NA            |
| 1423895_a_at       | 4.45           | 0.0001   | 0.001   | 7.44              | 1               | Cugbp2        |
| 1448848_at         | 4.45           | 0.0001   | 0.001   | 9.53              | 0.82            | Tor1b         |
| 1440443_at         | 4.44           | 0.00011  | 0.00101 | 7.08              | 1.79            | E030016H06Rik |
| 1441793_at         | 4.44           | 0.00011  | 0.00102 | 8.16              | 0.79            | Rnf39         |
| 1443116_at         | 4.44           | 0.00011  | 0.00102 | 4.47              | 1.33            | Psme4         |
| 1446074_at         | 4.44           | 0.00011  | 0.00103 | 9.84              | 0.69            | Mosc1         |
| 1437162_at         | 4.43           | 0.00011  | 0.00103 | 8.86              | 0.74            | Caprin1       |
| 1423233_at         | 4.43           | 0.00011  | 0.00104 | 9.04              | 1.91            | Cebpd         |
| 1439643_at         | 4.43           | 0.00011  | 0.00104 | 5.98              | 1.25            | Acvr2a        |
| 1429055_at         | 4.43           | 0.00011  | 0.00104 | 10.12             | 0.74            | 4930506M07Rik |
| 1437274_at         | 4.43           | 0.00011  | 0.00104 | 6.63              | 0.96            | Copa          |
| 1423611_at         | 4.43           | 0.00011  | 0.00104 | 6.93              | 1.14            | Alpl          |
| 1421058_at         | 4.43           | 0.00011  | 0.00104 | 4.37              | 1.17            | Adh7          |
| 1429223_a_at       | 4.42           | 0.00011  | 0.00105 | 8.97              | 0.77            | Hfe2          |
| 1459992_x_at       | 4.42           | 0.00011  | 0.00106 | 8.46              | 0.77            | Cln8          |
| 1433519_at         | 4.42           | 0.00011  | 0.00107 | 11.95             | 0.64            | Nucks1        |
| 1417029_a_at       | 4.42           | 0.00011  | 0.00107 | 4.54              | 1.17            | Trim2         |
| 1427250_at         | 4.41           | 0.00011  | 0.00108 | 11.64             | 0.68            | Atp2a2        |
| 1436120_at         | 4.41           | 0.00012  | 0.00108 | 6.81              | 1.53            | Setdb2        |
| 1450395_at         | 4.41           | 0.00012  | 0.00109 | 10.52             | 1.03            | Slc22a5       |
| 1459196_at         | 4.41           | 0.00012  | 0.00109 | 4.56              | 1.11            | NA            |
| 1426942_at         | 4.4            | 0.00012  | 0.00112 | 7.44              | 0.95            | Aim1          |
| 1449733_s_at       | 4.39           | 0.00012  | 0.00113 | 6.41              | 1.12            | Siah1a        |
| 1457027_at         | 4.39           | 0.00012  | 0.00114 | 9.54              | 0.69            | Dhtkd1        |
| 1436314_at         | 4.39           | 0.00012  | 0.00114 | 7.9               | 1.02            | Scyl2         |
| 1453470_a_at       | 4.39           | 0.00012  | 0.00115 | 4.13              | 0.95            | Gna13         |
| 1448271_a_at       | 4.38           | 0.00013  | 0.00117 | 5.84              | 1.15            | Ddx21         |
| 1424481_s_at       | 4.38           | 0.00013  | 0.00117 | 3.55              | 0.87            | Armcx5        |
| 1456159_at         | 4.38           | 0.00013  | 0.00117 | 6.89              | 1.23            | Setd5         |
| 1444195_at         | 4.37           | 0.00013  | 0.00119 | 4.99              | 1.42            | Rmnd5a        |
| 1443905_at         | 4.37           | 0.00013  | 0.0012  | 3.73              | 0.76            | Sfrs8         |
| 1432517_a_at       | 4.37           | 0.00013  | 0.00121 | 12.23             | 0.79            | Nnmt          |
| 1425030_at         | 4.36           | 0.00013  | 0.00121 | 7.07              | 0.93            | Zfp622        |
| 1426664_x_at       | 4.36           | 0.00013  | 0.00122 | 8.98              | 0.83            | Slc45a3       |
| 1428012_at         | 4.36           | 0.00013  | 0.00122 | 10.48             | 1.29            | C8a           |
| 1441200_at         | 4.36           | 0.00013  | 0.00123 | 4.86              | 1.31            | Klf3          |
| 1423439_at         | 4.35           | 0.00014  | 0.00124 | 14.13             | 0.46            | Pck1          |
| 1437270_a_at       | 4.35           | 0.00014  | 0.00124 | 4.71              | 1.09            | Clcf1         |
| 1431197_at         | 4.35           | 0.00014  | 0.00125 | 8.79              | 0.86            | Arl6ip2       |
| 1437094_x_at       | 4.34           | 0.00014  | 0.00126 | 3.33              | 1.03            | Dnaic1        |

| Probe <sup>1</sup> | t <sup>2</sup> | p-value | q-value | Mean <sup>3</sup> | FC <sup>4</sup> | Symbol        |
|--------------------|----------------|---------|---------|-------------------|-----------------|---------------|
| 1417212_at         | 4.34           | 0.00014 | 0.00128 | 9.37              | 0.76            | 9530058B02Rik |
| 1454870_x_at       | 4.34           | 0.00014 | 0.00129 | 7.52              | 1.16            | Gpr172b       |
| 1438658_a_at       | 4.33           | 0.00015 | 0.00131 | 5.55              | 1.33            | Edg3          |
| 1425059_at         | 4.33           | 0.00015 | 0.00131 | 5.25              | 1.22            | Prmt6         |
| 1448270_at         | 4.33           | 0.00015 | 0.00131 | 8.27              | 0.87            | Ddx21         |
| 1435446_a_at       | 4.33           | 0.00015 | 0.00131 | 11.95             | 0.73            | Chpt1         |
| 1440038_at         | 4.33           | 0.00015 | 0.00131 | 5.3               | 1.11            | B430007K19Rik |
| 1422778_at         | 4.33           | 0.00015 | 0.00132 | 10.5              | 0.6             | Taf9          |
| 1423702_at         | 4.32           | 0.00015 | 0.00132 | 10.95             | 0.6             | H1f0          |
| 1437093_at         | 4.32           | 0.00015 | 0.00133 | 4.03              | 1.02            | Dnaic1        |
| 1456735_x_at       | 4.32           | 0.00015 | 0.00134 | 9.68              | 0.76            | Acpl2         |
| 1455540_at         | 4.32           | 0.00015 | 0.00134 | 14.24             | 0.43            | Cps1          |
| 1438359_at         | 4.32           | 0.00015 | 0.00135 | 10.7              | 0.61            | 2010003K15Rik |
| 1451543_at         | 4.31           | 0.00015 | 0.00136 | 6.89              | 1.12            | Fbxo21        |
| 1455430_at         | 4.31           | 0.00015 | 0.00136 | 8.11              | 0.94            | Prr8          |
| 1417499_at         | 4.31           | 0.00015 | 0.00136 | 10.08             | 0.68            | Timm10        |
| 1455371_at         | 4.31           | 0.00015 | 0.00137 | 3.72              | 0.91            | Rfxank        |
| 1416923_a_at       | 4.31           | 0.00016 | 0.00138 | 10.85             | 0.72            | Bnip3l        |
| 1430271_x_at       | 4.3            | 0.00016 | 0.00139 | 8.1               | 0.73            | Josd3         |
| 1418447_at         | 4.3            | 0.00016 | 0.00139 | 9.42              | 0.69            | Golga5        |
| 1451539_at         | 4.3            | 0.00016 | 0.0014  | 8.81              | 0.9             | Baiap2l1      |
| 1449442_at         | 4.3            | 0.00016 | 0.0014  | 11.11             | 1.02            | Pex11a        |
| 1456844_at         | 4.3            | 0.00016 | 0.00141 | 3.89              | 0.93            | Camk2d        |
| 1451612_at         | 4.29           | 0.00016 | 0.00142 | 7.73              | 2.62            | Mt1           |
| 1444218_at         | 4.29           | 0.00016 | 0.00143 | 4.62              | 1.05            | D19Ert737e    |
| 1416794_at         | 4.29           | 0.00016 | 0.00143 | 10.19             | 0.72            | Arl6ip2       |
| 1424932_at         | 4.29           | 0.00016 | 0.00143 | 9.48              | 1.44            | Egfr          |
| 1426291_at         | 4.29           | 0.00016 | 0.00143 | 3.72              | 0.91            | Dimt1         |
| 1426607_at         | 4.28           | 0.00017 | 0.00145 | 8.87              | 0.72            | EG633640      |
| 1448133_at         | 4.28           | 0.00017 | 0.00145 | 8.9               | 0.68            | Nmd3          |
| 1448854_s_at       | 4.28           | 0.00017 | 0.00146 | 13.48             | 1.01            | Mug1          |
| 1418300_a_at       | 4.28           | 0.00017 | 0.00148 | 10.84             | 0.63            | Mknk2         |
| 1439515_at         | 4.27           | 0.00017 | 0.00149 | 7.48              | 0.88            | Setd5         |
| 1442499_at         | 4.27           | 0.00017 | 0.00149 | 5.2               | 1.07            | Cdv3          |
| 1445543_at         | 4.27           | 0.00017 | 0.00149 | 3.49              | 0.89            | Zmym5         |
| 1430077_at         | 4.27           | 0.00017 | 0.00149 | 6.33              | 1.22            | Sfrs11        |
| 1431800_at         | 4.27           | 0.00017 | 0.0015  | 4.74              | 1.23            | 1300010F03Rik |
| 1456071_a_at       | 4.26           | 0.00017 | 0.00151 | 14.1              | 0.46            | Cyca          |
| 1437238_x_at       | 4.26           | 0.00017 | 0.00151 | 9.53              | 0.61            | Nmd3          |
| 1428068_at         | 4.26           | 0.00017 | 0.00151 | 9.98              | 0.63            | Samm50        |
| 1440854_at         | 4.26           | 0.00017 | 0.00151 | 5.31              | 1.01            | 2810403A07Rik |
| 1443649_at         | 4.26           | 0.00018 | 0.00151 | 5.52              | 0.99            | Huwe1         |
| 1428809_at         | 4.26           | 0.00018 | 0.00152 | 5.38              | 1.08            | 1810010H24Rik |
| 1426625_at         | 4.26           | 0.00018 | 0.00152 | 8.21              | 1               | Zfp623        |
| 1452061_s_at       | 4.26           | 0.00018 | 0.00152 | 9.21              | 0.68            | Strbp         |
| 1423431_a_at       | 4.26           | 0.00018 | 0.00152 | 9.18              | 0.68            | Mybbp1a       |
| 1443835_x_at       | 4.26           | 0.00018 | 0.00153 | 5.86              | 0.98            | 1110014K08Rik |
| 1430161_at         | 4.25           | 0.00018 | 0.00154 | 2.94              | 0.67            | Dlst          |
| 1441718_at         | 4.25           | 0.00018 | 0.00154 | 3.04              | 0.79            | Ubr5          |
| 1424677_at         | 4.25           | 0.00018 | 0.00155 | 6.11              | 1.02            | Cyp2j9        |
| 1441023_at         | 4.25           | 0.00018 | 0.00157 | 4.41              | 1.07            | Eif2s2        |
| 1430370_at         | 4.24           | 0.00018 | 0.00158 | 5.49              | 1.45            | Eprs          |
| 1426950_at         | 4.24           | 0.00019 | 0.00159 | 8.65              | 0.73            | Parp16        |

| Probe <sup>1</sup>     | t <sup>2</sup> | p-value | q-value | Mean <sup>3</sup> | FC <sup>4</sup> | Symbol        |
|------------------------|----------------|---------|---------|-------------------|-----------------|---------------|
| 1429822_at             | 4.24           | 0.00019 | 0.0016  | 8.59              | 1.01            | 4633401B06Rik |
| 1433668_at             | 4.24           | 0.00019 | 0.0016  | 11.41             | 0.6             | Pnrc1         |
| 1424853_s_at           | 4.23           | 0.00019 | 0.00161 | 14.86             | 0.38            | Cyp4a10       |
| 1460196_at             | 4.23           | 0.00019 | 0.00161 | 10.76             | 0.83            | Cbr1          |
| 1434802_s_at           | 4.23           | 0.00019 | 0.00163 | 4.33              | 2               | Ntf3          |
| 1428738_a_at           | 4.22           | 0.0002  | 0.00164 | 10.01             | 0.68            | D14Ert449e    |
| 1460725_at             | 4.22           | 0.0002  | 0.00164 | 8.96              | 0.69            | Xpa           |
| 1453081_at             | 4.22           | 0.0002  | 0.00164 | 5.42              | 1.07            | 2410022M11Rik |
| 1430969_at             | 4.22           | 0.0002  | 0.00164 | 5.32              | 0.96            | Mtch2         |
| 1456865_x_at           | 4.22           | 0.0002  | 0.00164 | 10.53             | 0.69            | Rrs1          |
| 1438992_x_at           | 4.22           | 0.0002  | 0.00164 | 9.68              | 0.73            | Atf4          |
| 1455656_at             | 4.22           | 0.0002  | 0.00165 | 4.99              | 1.21            | Btla          |
| 1426395_s_at           | 4.21           | 0.0002  | 0.00169 | 9.48              | 0.61            | Eif3j         |
| 1442671_at             | 4.21           | 0.0002  | 0.00171 | 2.95              | 0.72            | Ube2k         |
| 1421681_at             | 4.21           | 0.00021 | 0.00171 | 6.03              | 1.59            | Nrg4          |
| 1420093_s_at           | 4.2            | 0.00021 | 0.00172 | 9.51              | 0.68            | Hnrpd1        |
| 1416576_at             | 4.2            | 0.00021 | 0.00173 | 4.57              | 1.19            | Socs3         |
| 1431334_a_at           | 4.19           | 0.00021 | 0.00176 | 6.19              | 1.11            | 4933433P14Rik |
| 1424201_a_at           | 4.19           | 0.00021 | 0.00176 | 6.97              | 0.93            | Seh1l         |
| 1427533_at             | 4.19           | 0.00021 | 0.00177 | 4.16              | 1.01            | Als2cl        |
| 1453356_at             | 4.19           | 0.00021 | 0.00178 | 4.97              | 1.17            | 5730453I16Rik |
| 1441266_at             | 4.19           | 0.00022 | 0.00179 | 5.84              | 1.19            | Strn3         |
| 1422509_at             | 4.19           | 0.00022 | 0.00179 | 10.89             | 0.62            | U2af1         |
| (-)PyrCarbMur/L09192_M | 4.17           | 0.00022 | 0.00183 | 9.5               | 0.7             | Pcx           |
| 1439348_at             | 4.17           | 0.00023 | 0.00184 | 5.31              | 1.03            | S100a10       |
| 1456256_at             | 4.17           | 0.00023 | 0.00187 | 8.97              | 0.79            | Eif5          |
| 1440671_at             | 4.16           | 0.00023 | 0.00188 | 4.55              | 1.26            | A130012E19Rik |
| 1456386_at             | 4.16           | 0.00023 | 0.00188 | 9.38              | 0.83            | Rbm39         |
| 1440272_at             | 4.16           | 0.00023 | 0.00189 | 7.36              | 0.93            | Eif2s1        |
| 1456986_at             | 4.16           | 0.00023 | 0.0019  | 2.93              | 0.76            | Zbtb16        |
| 1417819_at             | 4.16           | 0.00024 | 0.00191 | 7.86              | 1.01            | Tor1b         |
| 1456698_s_at           | 4.16           | 0.00024 | 0.00191 | 9.61              | 0.66            | Hnrpd1        |
| 1458536_at             | 4.16           | 0.00024 | 0.00191 | 3.35              | 0.75            | Ccni          |
| 1454935_at             | 4.16           | 0.00024 | 0.00191 | 8.9               | 0.79            | D930001I22Rik |
| 1423430_at             | 4.15           | 0.00024 | 0.00193 | 7.44              | 1.01            | Mybbp1a       |
| 1426850_a_at           | 4.15           | 0.00024 | 0.00194 | 4.18              | 1.06            | Map2k6        |
| 1429784_at             | 4.15           | 0.00024 | 0.00194 | 6.81              | 1.04            | Mapk1ip1l     |
| 1453006_at             | 4.15           | 0.00024 | 0.00194 | 3.35              | 0.8             | Fgfbp3        |
| 1424610_at             | 4.15           | 0.00024 | 0.00194 | 7.86              | 0.95            | Trub2         |
| 1415773_at             | 4.14           | 0.00025 | 0.00197 | 10.62             | 0.63            | Ncl           |
| 1452363_a_at           | 4.14           | 0.00025 | 0.00198 | 8.31              | 0.79            | Atp2a2        |
| 1428357_at             | 4.14           | 0.00025 | 0.00199 | 8.07              | 0.85            | 2610019F03Rik |
| 1458962_at             | 4.13           | 0.00026 | 0.00203 | 6.76              | 0.84            | Rnf103        |
| 1416998_at             | 4.13           | 0.00026 | 0.00204 | 9.37              | 0.72            | Rrs1          |
| 1419395_at             | 4.12           | 0.00026 | 0.00205 | 10.83             | 0.62            | Acot12        |
| 1450624_at             | 4.12           | 0.00026 | 0.00205 | 15.09             | 0.3             | Bhmt          |
| 1455935_at             | 4.12           | 0.00026 | 0.00206 | 4.6               | 1.07            | 2410131K14Rik |
| 1424074_at             | 4.12           | 0.00026 | 0.00207 | 5.36              | 1               | Btf3l4        |
| 1440158_x_at           | 4.12           | 0.00026 | 0.00208 | 3.24              | 0.95            | Chchd7        |
| 1429593_at             | 4.11           | 0.00027 | 0.00209 | 7.99              | 1.3             | Slc38a2       |
| 1456363_at             | 4.11           | 0.00027 | 0.00211 | 4.29              | 1.07            | St7l          |
| 1442350_at             | 4.11           | 0.00027 | 0.00212 | 3.88              | 1.46            | NA            |
| 1451644_a_at           | 4.11           | 0.00027 | 0.00212 | 7.58              | 1.23            | H2-gs10       |

| Probe <sup>1</sup> | t <sup>2</sup> | p-value | q-value | Mean <sup>3</sup> | FC <sup>4</sup> | Symbol        |
|--------------------|----------------|---------|---------|-------------------|-----------------|---------------|
| 1448990_a_at       | 4.11           | 0.00027 | 0.00212 | 9.69              | 0.59            | Myo1b         |
| 1417201_at         | 4.1            | 0.00027 | 0.00214 | 5.74              | 1.07            | Nt5c2         |
| 1428888_at         | 4.1            | 0.00027 | 0.00214 | 3.73              | 0.87            | Tmem33        |
| 1434882_at         | 4.1            | 0.00027 | 0.00214 | 9.64              | 0.62            | Mtdh          |
| 1454288_at         | 4.1            | 0.00028 | 0.00215 | 4.96              | 1.05            | 5830468K08Rik |
| 1436202_at         | 4.1            | 0.00028 | 0.00216 | 7.55              | 1.6             | NA            |
| 1418659_at         | 4.1            | 0.00028 | 0.00216 | 9.13              | 0.62            | Clock         |
| 1423796_at         | 4.09           | 0.00028 | 0.00218 | 7.66              | 0.78            | Sfpq          |
| 1424611_x_at       | 4.09           | 0.00028 | 0.00221 | 8.22              | 0.78            | Trub2         |
| 1433632_at         | 4.09           | 0.00029 | 0.00221 | 7.66              | 1.64            | Irf2bp2       |
| 1417042_at         | 4.09           | 0.00029 | 0.00222 | 11.24             | 0.8             | Slc37a4       |
| 1441973_at         | 4.08           | 0.00029 | 0.00225 | 6.46              | 0.9             | Zfp295        |
| 1439314_at         | 4.08           | 0.0003  | 0.00228 | 5.77              | 0.95            | Clock         |
| 1420930_s_at       | 4.07           | 0.0003  | 0.00229 | 4.96              | 1.02            | Ctnna1        |
| 1416846_a_at       | 4.07           | 0.0003  | 0.00229 | 8.57              | 0.86            | Pdzrn3        |
| 1434866_x_at       | 4.07           | 0.0003  | 0.00229 | 11.64             | 0.66            | Cpt1a         |
| 1444783_at         | 4.07           | 0.0003  | 0.00229 | 3.32              | 0.71            | Abi2          |
| 1438259_at         | 4.07           | 0.0003  | 0.00229 | 6.85              | 0.99            | NA            |
| 1440417_at         | 4.07           | 0.0003  | 0.0023  | 5.13              | 1.24            | D19Ert409e    |
| 1418488_s_at       | 4.07           | 0.0003  | 0.0023  | 8.35              | 1.01            | Ripk4         |
| 1418645_at         | 4.07           | 0.0003  | 0.0023  | 11.41             | 0.75            | Hal           |
| 1439630_x_at       | 4.07           | 0.0003  | 0.0023  | 4.01              | 0.96            | Sbsn          |
| 1418734_at         | 4.06           | 0.00031 | 0.00234 | 3.41              | 0.84            | H2-Q1         |
| 1456011_x_at       | 4.06           | 0.00031 | 0.00235 | 10.25             | 0.6             | Acaa1a        |
| 1423862_at         | 4.06           | 0.00031 | 0.00235 | 5.8               | 1.15            | Plekhf2       |
| 1450417_a_at       | 4.05           | 0.00031 | 0.00239 | 6.12              | 1.03            | Rps20         |
| 1455901_at         | 4.05           | 0.00032 | 0.0024  | 10.68             | 0.57            | Chpt1         |
| 1439537_at         | 4.05           | 0.00032 | 0.00241 | 6.56              | 0.97            | NA            |
| 1424251_a_at       | 4.05           | 0.00032 | 0.00242 | 11.77             | 0.61            | Hnrpd1        |
| 1451587_a_at       | 4.05           | 0.00032 | 0.00242 | 8.72              | 0.7             | Tipr1         |
| 1440263_at         | 4.04           | 0.00032 | 0.00243 | 3.55              | 0.73            | Nrp           |
| 1445534_at         | 4.04           | 0.00033 | 0.00247 | 6.72              | 1.12            | Flnb          |
| 1425305_at         | 4.03           | 0.00033 | 0.00249 | 4.06              | 0.87            | Zfp295        |
| 1428389_s_at       | 4.03           | 0.00034 | 0.00253 | 8.2               | 0.74            | Wdr43         |
| 1455013_at         | 4.02           | 0.00034 | 0.00255 | 7.86              | 0.82            | Arih2         |
| 1417116_at         | 4.02           | 0.00034 | 0.00255 | 4.45              | 0.89            | Slc6a8        |
| 1428106_at         | 4.02           | 0.00034 | 0.00256 | 10.5              | 0.55            | 1300001I01Rik |
| 1437302_at         | 4.02           | 0.00035 | 0.00257 | 5.49              | 1.67            | Adrb2         |
| 1426663_s_at       | 4.02           | 0.00035 | 0.00257 | 8.94              | 0.79            | Slc45a3       |
| 1435222_at         | 4.02           | 0.00035 | 0.00258 | 7.07              | 0.88            | Foxp1         |
| 1438178_x_at       | 4.01           | 0.00035 | 0.00261 | 10.94             | 0.61            | Atad3a        |
| 1448950_at         | 4.01           | 0.00035 | 0.00262 | 6.81              | 1.57            | Il1r1         |
| 1416930_at         | 4.01           | 0.00035 | 0.00262 | 4.81              | 1.4             | Ly6d          |
| 1440134_at         | 4.01           | 0.00035 | 0.00262 | 8.75              | 0.81            | Cyp4a31       |
| 1428478_at         | 4.01           | 0.00036 | 0.00263 | 3.95              | 0.8             | Reep4         |
| 1424790_at         | 4.01           | 0.00036 | 0.00265 | 8.04              | 0.75            | Slc25a42      |
| 1433779_at         | 4.01           | 0.00036 | 0.00265 | 4.44              | 0.87            | Casc4         |
| 1438371_x_at       | 4              | 0.00036 | 0.00267 | 12.5              | 0.48            | Ddx5          |
| 1417130_s_at       | 4              | 0.00036 | 0.00267 | 11.55             | 0.68            | Angptl4       |
| 1460035_at         | 4              | 0.00036 | 0.00267 | 5.36              | 1               | Phb2          |
| 1456651_a_at       | 4              | 0.00036 | 0.00267 | 6.99              | 0.89            | Tpr           |
| 1448455_at         | 4              | 0.00036 | 0.00268 | 6.93              | 0.97            | Cln8          |
| 1435985_at         | 4              | 0.00037 | 0.0027  | 7.83              | 0.74            | Farp2         |

| Probe <sup>1</sup>     | t <sup>2</sup> | p-value | q-value | Mean <sup>3</sup> | FC <sup>4</sup> | Symbol        |
|------------------------|----------------|---------|---------|-------------------|-----------------|---------------|
| 1423130_a_at           | 4              | 0.00037 | 0.0027  | 11.73             | 0.6             | Sfrs5         |
| 1442793_s_at           | 3.99           | 0.00037 | 0.00273 | 8.86              | 0.72            | Tbrg4         |
| 1454078_a_at           | 3.99           | 0.00037 | 0.00274 | 3.46              | 0.89            | Gal3st1       |
| 1416793_at             | 3.99           | 0.00038 | 0.00274 | 11.86             | 0.57            | Arl6ip2       |
| 1459601_at             | 3.99           | 0.00038 | 0.00274 | 4.45              | 1.36            | Snf1lk        |
| 1447025_at             | 3.99           | 0.00038 | 0.00276 | 3.17              | 0.93            | Ube2e2        |
| 1433759_at             | 3.98           | 0.00038 | 0.00278 | 8.65              | 0.8             | Dpy19l1       |
| 1436108_at             | 3.97           | 0.00039 | 0.00284 | 4.99              | 1               | Txndc9        |
| 1423654_a_at           | 3.97           | 0.00039 | 0.00284 | 9.72              | 0.58            | Rnf4          |
| 1416060_at             | 3.97           | 0.00039 | 0.00285 | 10.73             | 0.55            | Tbc1d15       |
| 1436323_at             | 3.97           | 0.00039 | 0.00285 | 6.55              | 0.92            | 2810001A02Rik |
| 1456541_x_at           | 3.97           | 0.0004  | 0.00285 | 10.65             | 0.57            | Atad3a        |
| 1433819_s_at           | 3.97           | 0.0004  | 0.00285 | 9.76              | 0.61            | Agpat3        |
| 1451077_at             | 3.97           | 0.0004  | 0.00287 | 9.3               | 0.68            | Rpl5          |
| 1433816_at             | 3.96           | 0.0004  | 0.0029  | 10.49             | 0.83            | Mcart1        |
| 1448034_at             | 3.96           | 0.00041 | 0.0029  | 9.03              | 0.68            | AI842396      |
| 1456886_at             | 3.96           | 0.00041 | 0.00291 | 7.37              | 0.91            | Brp44l        |
| 1458518_at             | 3.96           | 0.00041 | 0.00293 | 5.01              | 1.07            | Cpeb2         |
| 1429717_at             | 3.96           | 0.00041 | 0.00294 | 3.21              | 0.76            | Ipo11         |
| 1429038_at             | 3.96           | 0.00041 | 0.00295 | 7.72              | 0.83            | Dda1          |
| 1439934_at             | 3.96           | 0.00041 | 0.00295 | 8.9               | 0.77            | Slc30a10      |
| 1434939_at             | 3.95           | 0.00042 | 0.00296 | 5.86              | 1.05            | Foxf1a        |
| 1423710_at             | 3.95           | 0.00042 | 0.00299 | 10.83             | 0.64            | Dlst          |
| 1436740_at             | 3.95           | 0.00042 | 0.003   | 8.31              | 0.74            | 6820431F20Rik |
| 1424731_at             | 3.94           | 0.00043 | 0.00301 | 3.96              | 0.94            | Nle1          |
| 1456506_at             | 3.94           | 0.00043 | 0.00302 | 5.62              | 0.97            | Prpf38b       |
| 1420832_at             | 3.94           | 0.00043 | 0.00303 | 10.26             | 0.58            | Qsox1         |
| 1450777_at             | 3.94           | 0.00043 | 0.00303 | 8.69              | 0.7             | Xrn2          |
| 1423661_s_at           | 3.94           | 0.00043 | 0.00303 | 5.95              | 0.97            | Ctdsp2        |
| 1427225_at             | 3.94           | 0.00043 | 0.00303 | 5.86              | 0.93            | Epn2          |
| 1429436_at             | 3.94           | 0.00043 | 0.00303 | 8.45              | 0.63            | Prpf40a       |
| 1439722_at             | 3.93           | 0.00044 | 0.00307 | 6.81              | 0.89            | NA            |
| 1447951_at             | 3.93           | 0.00044 | 0.00307 | 5.28              | 1.64            | 5730403B10Rik |
| 1430369_at             | 3.93           | 0.00044 | 0.00309 | 3.66              | 0.85            | Epb4.1        |
| 1417188_s_at           | 3.93           | 0.00045 | 0.00312 | 6.5               | 0.85            | Ube2k         |
| 1448970_at             | 3.92           | 0.00046 | 0.00318 | 10.27             | 0.58            | Slc25a46      |
| 1457851_at             | 3.92           | 0.00046 | 0.00318 | 6.51              | 1.42            | D10Erttd276e  |
| 1416996_at             | 3.92           | 0.00046 | 0.00319 | 7.89              | 1.04            | Tbc1d8        |
| 1428542_at             | 3.91           | 0.00046 | 0.0032  | 9.34              | 0.67            | Eif1ad        |
| 1441081_a_at           | 3.91           | 0.00046 | 0.0032  | 7.7               | 0.8             | 1110038B12Rik |
| 1437110_at             | 3.91           | 0.00046 | 0.0032  | 9.28              | 0.98            | 2810474O19Rik |
| 1417279_at             | 3.91           | 0.00047 | 0.00321 | 7.47              | 0.94            | Itp1          |
| 1447891_at             | 3.91           | 0.00047 | 0.00321 | 4.55              | 1.47            | Tacc2         |
| 1441688_at             | 3.91           | 0.00047 | 0.00322 | 3.83              | 1.38            | 6430537I21Rik |
| 1426464_at             | 3.91           | 0.00047 | 0.00323 | 5.46              | 1.31            | Nr1d1         |
| 1435003_at             | 3.9            | 0.00048 | 0.00326 | 9.25              | 0.68            | Pi4ka         |
| 1422996_at             | 3.9            | 0.00048 | 0.00326 | 6.82              | 1.49            | Acot2         |
| 1442311_at             | 3.9            | 0.00048 | 0.00326 | 6.83              | 0.94            | Zfr           |
| 1442047_at             | 3.9            | 0.00048 | 0.0033  | 3.68              | 0.83            | Rreb1         |
| 1427171_at             | 3.9            | 0.00048 | 0.0033  | 7.46              | 0.87            | Rlf           |
| 1419292_at             | 3.9            | 0.00048 | 0.0033  | 3.77              | 0.98            | Htra3         |
| (-Pyr)CarbMur/L09192_M | 3.9            | 0.00049 | 0.00331 | 6.92              | 0.91            | Pcx           |
| 1439249_at             | 3.9            | 0.00049 | 0.00332 | 6.07              | 0.93            | Wac           |

| Probe <sup>1</sup> | t <sup>2</sup> | p-value | q-value | Mean <sup>3</sup> | FC <sup>4</sup> | Symbol        |
|--------------------|----------------|---------|---------|-------------------|-----------------|---------------|
| 1451680_at         | 3.89           | 0.00049 | 0.00333 | 6.44              | 1.1             | Srxn1         |
| 1419130_at         | 3.89           | 0.00049 | 0.00333 | 4.92              | 0.99            | Adat2         |
| 1421005_at         | 3.89           | 0.00049 | 0.00334 | 4.95              | 0.93            | Cep110        |
| 1451979_at         | 3.89           | 0.00049 | 0.00335 | 9.62              | 0.63            | Kras          |
| 1445241_at         | 3.89           | 0.0005  | 0.00336 | 3.43              | 0.74            | Rab11fip4     |
| 1439173_at         | 3.89           | 0.0005  | 0.00336 | 5.46              | 1.2             | Hook1         |
| 1434553_at         | 3.89           | 0.0005  | 0.00338 | 12.89             | 0.54            | Tmem56        |
| 1426609_at         | 3.89           | 0.0005  | 0.00339 | 7.46              | 0.86            | Dis3          |
| 1444349_at         | 3.89           | 0.0005  | 0.00339 | 4.71              | 0.99            | Arid2         |
| 1444875_at         | 3.88           | 0.0005  | 0.00339 | 4.09              | 0.85            | Ppp2ca        |
| 1416485_at         | 3.88           | 0.0005  | 0.0034  | 12.26             | 0.52            | Timm23        |
| 1426327_s_at       | 3.88           | 0.00051 | 0.00341 | 8.61              | 0.66            | Zfp91         |
| 1434384_at         | 3.88           | 0.00051 | 0.00341 | 8.12              | 0.72            | Nrip1         |
| 1422767_at         | 3.88           | 0.00051 | 0.00341 | 7.42              | 0.75            | Bysl          |
| 1443546_at         | 3.88           | 0.00051 | 0.00342 | 4.7               | 1.09            | Hdlbp         |
| 1429556_at         | 3.88           | 0.00052 | 0.00346 | 5.54              | 1.08            | 2610024B07Rik |
| 1459971_at         | 3.87           | 0.00052 | 0.00346 | 4.49              | 1.25            | Kcnt2         |
| 1455616_at         | 3.87           | 0.00052 | 0.00349 | 3.8               | 0.75            | AI586002      |
| 1451770_s_at       | 3.87           | 0.00053 | 0.0035  | 10.65             | 0.58            | Dhx9          |
| 1421907_at         | 3.87           | 0.00053 | 0.0035  | 8.07              | 0.7             | Med1          |
| 1442445_at         | 3.87           | 0.00053 | 0.0035  | 3.46              | 0.86            | 2610027H17Rik |
| 1429863_at         | 3.87           | 0.00053 | 0.00353 | 5.37              | 1.05            | Lonrf3        |
| 1426343_at         | 3.86           | 0.00054 | 0.00356 | 9.53              | 0.54            | Stt3b         |
| 1429216_at         | 3.86           | 0.00054 | 0.00357 | 7.77              | 0.81            | Paqr3         |
| 1453512_at         | 3.86           | 0.00054 | 0.00358 | 4.54              | 1.13            | 5830407P18Rik |
| 1441947_x_at       | 3.86           | 0.00054 | 0.00359 | 8.64              | 0.75            | BC033915      |
| 1460316_at         | 3.85           | 0.00055 | 0.00361 | 9.01              | 0.63            | Acsl1         |
| 1416216_at         | 3.85           | 0.00055 | 0.00361 | 8.02              | 0.74            | Reps1         |
| 1424776_a_at       | 3.85           | 0.00055 | 0.00362 | 7.68              | 0.93            | Slc25a28      |
| 1422031_a_at       | 3.85           | 0.00055 | 0.00363 | 10.21             | 0.55            | Zfand6        |
| 1460203_at         | 3.85           | 0.00055 | 0.00364 | 8.28              | 0.82            | Itrp1         |
| 1435034_at         | 3.85           | 0.00055 | 0.00364 | 4.45              | 1.04            | Rpap2         |
| 1448953_at         | 3.85           | 0.00056 | 0.00366 | 3.57              | 1.05            | Blm           |
| 1448937_at         | 3.84           | 0.00056 | 0.00369 | 8.51              | 0.6             | Slc35b3       |
| 1459242_at         | 3.84           | 0.00057 | 0.00372 | 3.8               | 1.14            | Elov15        |
| 1437711_x_at       | 3.84           | 0.00057 | 0.00372 | 12.1              | 0.52            | Odc1          |
| 1416605_at         | 3.84           | 0.00057 | 0.00372 | 9.12              | 0.69            | Nola2         |
| 1444472_at         | 3.83           | 0.00058 | 0.00377 | 4.06              | 0.91            | Snf1lk2       |
| 1440822_x_at       | 3.83           | 0.00059 | 0.00382 | 8.86              | 0.64            | Reps1         |
| 1456130_at         | 3.82           | 0.00059 | 0.00385 | 3.27              | 0.67            | LOC553091     |
| 1420072_s_at       | 3.82           | 0.00059 | 0.00385 | 3.78              | 1.03            | NA            |
| 1438593_at         | 3.82           | 0.0006  | 0.00386 | 3.5               | 0.85            | NA            |
| 1452500_at         | 3.82           | 0.0006  | 0.00388 | 3.7               | 0.7             | Tmlhe         |
| 1448274_at         | 3.82           | 0.0006  | 0.00389 | 10.24             | 0.55            | C1qbp         |
| 1424607_a_at       | 3.82           | 0.00061 | 0.0039  | 10.95             | 0.66            | LOC545174     |
| 1450031_at         | 3.82           | 0.00061 | 0.00391 | 10.1              | 0.58            | Aff4          |
| 1417601_at         | 3.81           | 0.00061 | 0.00392 | 6.57              | 1.16            | Rgs1          |
| 1418714_at         | 3.81           | 0.00061 | 0.00392 | 3.02              | 0.79            | Dusp8         |
| 1456668_at         | 3.81           | 0.00061 | 0.00393 | 3.51              | 0.69            | Zcchc11       |
| 1431220_at         | 3.81           | 0.00062 | 0.00396 | 4.5               | 0.99            | LOC100040353  |
| 1445235_at         | 3.81           | 0.00062 | 0.004   | 5.27              | 0.99            | Ythdf3        |
| 1430020_x_at       | 3.8            | 0.00063 | 0.00401 | 8.77              | 0.6             | Hnrnpa1       |
| 1456991_at         | 3.8            | 0.00063 | 0.00405 | 4.98              | 1.04            | Cobll1        |

| Probe <sup>1</sup> | t <sup>2</sup> | p-value | q-value | Mean <sup>3</sup> | FC <sup>4</sup> | Symbol        |
|--------------------|----------------|---------|---------|-------------------|-----------------|---------------|
| 1423372_at         | 3.8            | 0.00063 | 0.00405 | 8.31              | 0.82            | Pole4         |
| 1460711_at         | 3.8            | 0.00063 | 0.00405 | 8.2               | 0.67            | Dnajc21       |
| 1459274_at         | 3.8            | 0.00064 | 0.00406 | 4.66              | 0.89            | Gpr135        |
| 1430151_at         | 3.8            | 0.00064 | 0.00409 | 3.29              | 0.83            | Nisch         |
| 1416425_at         | 3.79           | 0.00064 | 0.0041  | 10.45             | 0.59            | Pex19         |
| 1439478_at         | 3.79           | 0.00065 | 0.00411 | 10.17             | 1.05            | Acot2         |
| 1448140_at         | 3.79           | 0.00065 | 0.00411 | 5.6               | 0.88            | Ciapin1       |
| 1435278_at         | 3.79           | 0.00065 | 0.00411 | 5.6               | 0.87            | 1810036N14Rik |
| 1425559_a_at       | 3.79           | 0.00065 | 0.00411 | 10.45             | 0.61            | Acs3          |
| 1443255_s_at       | 3.79           | 0.00066 | 0.00414 | 3.42              | 0.86            | Cdgap         |
| 1434089_at         | 3.79           | 0.00066 | 0.00416 | 6.03              | 1.14            | Synpo         |
| 1420033_s_at       | 3.78           | 0.00066 | 0.00417 | 10.95             | 0.58            | Ppp2r2d       |
| 1428025_s_at       | 3.78           | 0.00066 | 0.00417 | 6.66              | 0.84            | Pitpnc1       |
| 1435947_at         | 3.78           | 0.00066 | 0.00417 | 7.05              | 0.97            | 2810455D13Rik |
| 1440179_x_at       | 3.78           | 0.00067 | 0.00419 | 9.71              | 0.58            | Rnf217        |
| 1443166_at         | 3.78           | 0.00067 | 0.00423 | 4.14              | 1.02            | BC021395      |
| 1451794_at         | 3.78           | 0.00067 | 0.00423 | 3.58              | 1               | Tmcc3         |
| 1429914_at         | 3.78           | 0.00068 | 0.00423 | 3.97              | 0.89            | Epc1          |
| 1416290_a_at       | 3.78           | 0.00068 | 0.00424 | 11.98             | 0.49            | Psmc4         |
| 1456574_at         | 3.77           | 0.00069 | 0.00429 | 8.23              | 0.69            | NA            |
| 1447520_at         | 3.77           | 0.00069 | 0.0043  | 5.66              | 0.9             | Lbp           |
| 1419100_at         | 3.77           | 0.00069 | 0.0043  | 11.72             | 0.7             | Serpina3n     |
| 1420609_at         | 3.77           | 0.00069 | 0.00432 | 10.62             | 0.51            | Mar-07        |
| 1433453_a_at       | 3.76           | 0.0007  | 0.00434 | 9.39              | 0.7             | Abtb2         |
| 1419805_s_at       | 3.76           | 0.0007  | 0.00435 | 6.7               | 0.81            | Ggps1         |
| 1456932_at         | 3.76           | 0.0007  | 0.00435 | 2.84              | 0.56            | EG330503      |
| 1459689_at         | 3.76           | 0.0007  | 0.00435 | 3.75              | 1.42            | Gpd2          |
| 1455497_at         | 3.76           | 0.00071 | 0.0044  | 3.53              | 0.65            | Leng9         |
| 1454488_at         | 3.75           | 0.00072 | 0.00444 | 2.77              | 0.5             | 4930534I15Rik |
| 1435771_at         | 3.75           | 0.00072 | 0.00447 | 5.77              | 0.92            | Plcb4         |
| 1425632_a_at       | 3.75           | 0.00073 | 0.00448 | 7.23              | 0.89            | Pqlc2         |
| 1419857_at         | 3.75           | 0.00073 | 0.00449 | 7.73              | 1.25            | NA            |
| 1439477_at         | 3.75           | 0.00074 | 0.00452 | 6.26              | 0.89            | 5430406J06Rik |
| 1426326_at         | 3.75           | 0.00074 | 0.00452 | 8.99              | 0.68            | Zfp91         |
| 1452648_at         | 3.74           | 0.00074 | 0.00456 | 10.51             | 0.52            | Tbrg1         |
| 1443125_at         | 3.74           | 0.00074 | 0.00456 | 5.9               | 0.92            | Trip12        |
| 1444089_at         | 3.74           | 0.00075 | 0.00457 | 3.81              | 1.02            | Spnb2         |
| 1433284_at         | 3.74           | 0.00075 | 0.00458 | 2.54              | 0.79            | 4921522E08Rik |
| 1415957_a_at       | 3.74           | 0.00076 | 0.00461 | 8.21              | 0.69            | Rrp1          |
| 1451408_at         | 3.73           | 0.00076 | 0.00462 | 5.71              | 1.01            | Trub2         |
| 1447156_at         | 3.73           | 0.00076 | 0.00463 | 4.44              | 0.92            | Chm           |
| 1445571_at         | 3.73           | 0.00076 | 0.00465 | 3.87              | 0.8             | Tbk1          |
| 1417348_at         | 3.73           | 0.00077 | 0.00465 | 10.98             | 0.53            | 2310039H08Rik |
| 1451557_at         | 3.73           | 0.00077 | 0.0047  | 13.07             | 0.89            | Tat           |
| 1418874_a_at       | 3.73           | 0.00078 | 0.00471 | 11.46             | 0.56            | Psmc4         |
| 1457279_at         | 3.73           | 0.00078 | 0.00471 | 4.86              | 0.86            | NA            |
| 1416383_a_at       | 3.73           | 0.00078 | 0.00471 | 11.6              | 0.61            | Pcx           |
| 1416005_at         | 3.72           | 0.00078 | 0.00474 | 11.07             | 0.47            | Psmc1         |
| 1417797_a_at       | 3.72           | 0.00079 | 0.00475 | 7.74              | 0.82            | 1810019J16Rik |
| 1427087_at         | 3.72           | 0.00079 | 0.00477 | 7.82              | 0.69            | Luc7l2        |
| 1451256_at         | 3.72           | 0.0008  | 0.0048  | 3.62              | 0.72            | Gpr172b       |
| 1437660_at         | 3.72           | 0.0008  | 0.00481 | 6.27              | 0.95            | Nktr          |
| 1437100_x_at       | 3.72           | 0.0008  | 0.00481 | 11.1              | 1.35            | Pim3          |



| Probe <sup>1</sup>     | t <sup>2</sup> | p-value | q-value | Mean <sup>3</sup> | FC <sup>4</sup> | Symbol        |
|------------------------|----------------|---------|---------|-------------------|-----------------|---------------|
| 1416563_at             | 3.71           | 0.0008  | 0.00483 | 4.37              | 0.99            | Ctps          |
| 1448135_at             | 3.71           | 0.00081 | 0.00484 | 9.8               | 0.61            | Atf4          |
| 1452074_at             | 3.71           | 0.00081 | 0.00486 | 6.45              | 0.85            | Tmem135       |
| 1455102_at             | 3.71           | 0.00081 | 0.00487 | 8.84              | 0.6             | Larp4         |
| 1430147_a_at           | 3.71           | 0.00081 | 0.00487 | 7.37              | 0.86            | Josd3         |
| 1434138_at             | 3.71           | 0.00081 | 0.00487 | 6.92              | 0.99            | Prune         |
| 1456518_at             | 3.71           | 0.00081 | 0.00487 | 3.96              | 0.79            | 4930422I07Rik |
| 1418260_at             | 3.71           | 0.00082 | 0.00488 | 3.42              | 0.73            | Hunk          |
| 1422461_at             | 3.71           | 0.00082 | 0.00489 | 9.07              | 0.63            | Atad3a        |
| 1416922_a_at           | 3.71           | 0.00082 | 0.00491 | 10.5              | 0.63            | Bnip3l        |
| 1432511_s_at           | 3.7            | 0.00083 | 0.00495 | 4.96              | 0.93            | Cep27         |
| 1449029_at             | 3.7            | 0.00084 | 0.005   | 5.43              | 0.85            | Mknk2         |
| 1441006_at             | 3.7            | 0.00084 | 0.005   | 3.82              | 0.69            | LOC100043081  |
| 1460109_at             | 3.7            | 0.00084 | 0.005   | 3.27              | 0.67            | Tcf25         |
| 1446357_at             | 3.69           | 0.00085 | 0.00504 | 5.04              | 0.93            | BC020402      |
| 1452154_at             | 3.69           | 0.00085 | 0.00504 | 8.5               | 0.6             | Iars          |
| 1436208_at             | 3.69           | 0.00085 | 0.00504 | 4.33              | 0.88            | Asb1          |
| 1428373_at             | 3.69           | 0.00085 | 0.00506 | 6.1               | 1.23            | Ihpk2         |
| 1441796_at             | 3.69           | 0.00086 | 0.00507 | 5.87              | 0.94            | 2010309E21Rik |
| 1437288_at             | 3.69           | 0.00086 | 0.00508 | 10.63             | 0.49            | Impad1        |
| 1441501_at             | 3.69           | 0.00087 | 0.0051  | 6.32              | 0.94            | Serbp1        |
| 1428306_at             | 3.69           | 0.00087 | 0.0051  | 8.1               | 2.53            | Ddit4         |
| 1439045_x_at           | 3.68           | 0.00087 | 0.00512 | 3.76              | 0.74            | Tc2n          |
| 1421704_a_at           | 3.68           | 0.00087 | 0.00514 | 5.2               | 0.93            | Pik3c2g       |
| 1437102_at             | 3.68           | 0.00087 | 0.00514 | 7.82              | 0.73            | Ythdf1        |
| 1447898_s_at           | 3.68           | 0.00088 | 0.00514 | 10.59             | 0.5             | Sfrs6         |
| 1437343_x_at           | 3.68           | 0.00088 | 0.00514 | 9.26              | 0.66            | Atad3a        |
| 1423684_at             | 3.68           | 0.00088 | 0.00515 | 11.81             | 0.52            | Hnrpk         |
| 1456715_at             | 3.68           | 0.00088 | 0.00515 | 3.79              | 1.02            | Mycbp2        |
| 1437045_at             | 3.68           | 0.00088 | 0.00515 | 6.49              | 0.83            | Mapk8         |
| 1433769_at             | 3.68           | 0.00088 | 0.00515 | 7.81              | 0.78            | Als2cl        |
| 1434548_at             | 3.68           | 0.00088 | 0.00516 | 9.54              | 0.7             | Serinc3       |
| X-PyruCarbMur/L09192_3 | 3.68           | 0.00089 | 0.00517 | 11.25             | 0.61            | Pcx           |
| 1417511_at             | 3.68           | 0.00089 | 0.00518 | 7.65              | 0.72            | Lyar          |
| 1439215_at             | 3.68           | 0.00089 | 0.00518 | 3.89              | 0.87            | Atp2c1        |
| 1416144_a_at           | 3.68           | 0.00089 | 0.0052  | 11.58             | 0.56            | Dhx15         |
| 1429168_at             | 3.68           | 0.00089 | 0.0052  | 4.28              | 0.85            | Zbtb46        |
| 1430802_at             | 3.68           | 0.00089 | 0.0052  | 5.5               | 0.87            | H2-Q8         |
| 1426579_at             | 3.68           | 0.00089 | 0.0052  | 7.36              | 0.75            | Gnl2          |
| 1434524_at             | 3.67           | 0.00089 | 0.0052  | 7.76              | 0.76            | Eif2b3        |
| 1450788_at             | 3.67           | 0.00089 | 0.0052  | 10.85             | 1.48            | Saa1          |
| 1438948_x_at           | 3.67           | 0.0009  | 0.00523 | 9.85              | 0.56            | Tspo          |
| 1435632_at             | 3.67           | 0.0009  | 0.00523 | 7.1               | 0.77            | Nufip2        |
| 1421153_at             | 3.67           | 0.00091 | 0.00525 | 4.21              | 0.96            | Loxl4         |
| 1431252_a_at           | 3.67           | 0.00091 | 0.00525 | 6.97              | 0.83            | Zfp655        |
| 1444908_at             | 3.67           | 0.00091 | 0.00527 | 4.79              | 0.97            | Habp4         |
| 1422557_s_at           | 3.66           | 0.00093 | 0.00535 | 13.19             | 0.75            | Mt1           |
| 1434272_at             | 3.65           | 0.00095 | 0.00546 | 10.61             | 0.65            | Cpeb2         |
| 1430525_at             | 3.65           | 0.00096 | 0.00548 | 3.85              | 1.08            | 2310001K24Rik |
| 1452929_at             | 3.65           | 0.00096 | 0.00549 | 8.32              | 0.63            | Clip1         |
| 1425859_a_at           | 3.65           | 0.00096 | 0.00549 | 11.18             | 0.55            | Psmc4         |
| 1446129_at             | 3.65           | 0.00096 | 0.00549 | 3.32              | 0.64            | Rab5a         |
| 1443471_at             | 3.65           | 0.00096 | 0.00551 | 7.51              | 1.28            | Zbtb20        |

| Probe <sup>1</sup> | t <sup>2</sup> | p-value | q-value | Mean <sup>3</sup> | FC <sup>4</sup> | Symbol        |
|--------------------|----------------|---------|---------|-------------------|-----------------|---------------|
| 1435679_at         | 3.64           | 0.00098 | 0.0056  | 9.39              | 0.6             | Otpn          |
| 1426737_at         | 3.64           | 0.00099 | 0.00561 | 6.87              | 0.87            | Gspt1         |
| 1418901_at         | 3.63           | 0.001   | 0.00567 | 11.3              | 1.18            | Cebpb         |
| 1454646_at         | 3.63           | 0.001   | 0.0057  | 9.06              | 0.62            | Tcp11l2       |
| 1438168_x_at       | 3.63           | 0.001   | 0.0057  | 9.96              | 0.54            | Ddx39         |
| 1417880_at         | 3.63           | 0.00101 | 0.00573 | 12.74             | 0.61            | G6pc          |
| 1419636_at         | 3.62           | 0.00102 | 0.00578 | 8.3               | 0.72            | 4833420G17Rik |
| 1425097_a_at       | 3.62           | 0.00102 | 0.00578 | 4.44              | 0.84            | Zfp106        |
| 1435221_at         | 3.62           | 0.00103 | 0.0058  | 5.46              | 0.9             | NA            |
| 1438403_s_at       | 3.62           | 0.00103 | 0.0058  | 12.41             | 0.5             | Malat1        |
| 1423643_at         | 3.62           | 0.00103 | 0.0058  | 8.58              | 0.66            | Ddx39         |
| 1424344_s_at       | 3.62           | 0.00104 | 0.00582 | 8.62              | 0.73            | Eif1a         |
| 1421874_a_at       | 3.62           | 0.00104 | 0.00583 | 8.55              | 0.65            | Mrps23        |
| 1419994_s_at       | 3.62           | 0.00104 | 0.00585 | 8.51              | 0.67            | D10Ert641e    |
| 1429264_at         | 3.62           | 0.00104 | 0.00585 | 8.34              | 0.6             | C030044B11Rik |
| 1434282_at         | 3.61           | 0.00105 | 0.00589 | 8.06              | 0.77            | Ibtk          |
| 1458676_at         | 3.61           | 0.00106 | 0.00593 | 3.87              | 0.9             | Nktr          |
| 1450986_at         | 3.61           | 0.00107 | 0.00599 | 8.35              | 0.67            | Nol5          |
| 1433717_at         | 3.61           | 0.00108 | 0.00599 | 10.64             | 0.53            | D19Wsu162e    |
| 1418822_a_at       | 3.61           | 0.00108 | 0.00599 | 11.05             | 0.46            | Arf6          |
| 1425529_s_at       | 3.61           | 0.00108 | 0.006   | 9.93              | 0.56            | D19Wsu162e    |
| 1453976_at         | 3.6            | 0.00108 | 0.00602 | 3.57              | 0.69            | 4432414F05Rik |
| 1429810_at         | 3.6            | 0.00109 | 0.00603 | 4.16              | 0.8             | 4921505C17Rik |
| 1459350_at         | 3.6            | 0.00109 | 0.00605 | 3.05              | 0.6             | Socs6         |
| 1455683_a_at       | 3.6            | 0.00109 | 0.00605 | 5.87              | 0.95            | Tbc1d8        |
| 1416860_s_at       | 3.6            | 0.0011  | 0.00607 | 9.21              | 0.57            | Ing1          |
| 1420630_at         | 3.6            | 0.0011  | 0.00611 | 7.47              | 0.76            | 8430419L09Rik |
| 1416983_s_at       | 3.6            | 0.0011  | 0.00611 | 9.21              | 0.91            | Foxo1         |
| 1455437_at         | 3.6            | 0.0011  | 0.00611 | 9.63              | 0.55            | 9030204A07Rik |
| 1443046_at         | 3.6            | 0.00111 | 0.00612 | 5.6               | 1.35            | Abcd3         |
| 1436796_at         | 3.59           | 0.00111 | 0.00615 | 4.74              | 0.9             | Matr3         |
| 1417351_a_at       | 3.59           | 0.00112 | 0.00616 | 9.79              | 0.55            | Snrpa1        |
| 1438725_at         | 3.59           | 0.00113 | 0.00622 | 5.56              | 0.83            | Med13         |
| 1452125_at         | 3.59           | 0.00113 | 0.00622 | 8.29              | 0.64            | Thrap3        |
| 1430043_at         | 3.59           | 0.00113 | 0.00623 | 3.35              | 0.88            | Ttc19         |
| 1457949_at         | 3.59           | 0.00114 | 0.00624 | 4.94              | 0.93            | NA            |
| 1449457_at         | 3.59           | 0.00114 | 0.00625 | 10.85             | 0.55            | Acot12        |
| 1429767_at         | 3.58           | 0.00114 | 0.00626 | 6.13              | 0.87            | 2810013P06Rik |
| 1422472_at         | 3.58           | 0.00115 | 0.00629 | 6.44              | 0.87            | Pex13         |
| 1426246_at         | 3.58           | 0.00115 | 0.00631 | 9.24              | 0.69            | Pros1         |
| 1456514_at         | 3.58           | 0.00116 | 0.00632 | 3.81              | 0.73            | NA            |
| 1416939_at         | 3.58           | 0.00116 | 0.00632 | 12.23             | 0.52            | Ppa1          |
| 1456718_at         | 3.58           | 0.00116 | 0.00633 | 9.23              | 0.62            | Tmem56        |
| 1430769_s_at       | 3.58           | 0.00116 | 0.00633 | 7.89              | 0.75            | 2900009I07Rik |
| 1458709_a_at       | 3.58           | 0.00116 | 0.00634 | 3.07              | 0.65            | Atxn7l1       |
| 1428011_a_at       | 3.58           | 0.00117 | 0.00636 | 11.06             | 0.46            | Erbp2ip       |
| 1432850_at         | 3.57           | 0.00117 | 0.00637 | 5.27              | 0.93            | 5430434G16Rik |
| 1421968_a_at       | 3.57           | 0.00118 | 0.00639 | 8.44              | 0.62            | Nipa2         |
| 1433567_at         | 3.57           | 0.00119 | 0.00643 | 10.02             | 0.57            | Gmps          |
| 1436791_at         | 3.57           | 0.00119 | 0.00644 | 3.42              | 0.65            | Wnt5a         |
| 1432562_at         | 3.57           | 0.00119 | 0.00645 | 3.88              | 0.83            | 1110006G14Rik |
| 1429336_at         | 3.57           | 0.00119 | 0.00645 | 7.88              | 0.81            | Tmem87b       |
| 1422033_a_at       | 3.57           | 0.00119 | 0.00647 | 3.86              | 0.81            | Zfp91         |

| Probe <sup>1</sup>     | t <sup>2</sup> | p-value | q-value | Mean <sup>3</sup> | FC <sup>4</sup> | Symbol        |
|------------------------|----------------|---------|---------|-------------------|-----------------|---------------|
| 1427941_at             | 3.57           | 0.0012  | 0.00648 | 6.38              | 0.81            | Dicer1        |
| 1438761_a_at           | 3.57           | 0.0012  | 0.00648 | 10.37             | 0.57            | EG666231      |
| 1444503_at             | 3.56           | 0.00121 | 0.00653 | 4.59              | 0.94            | Gbas          |
| 1448334_a_at           | 3.56           | 0.00122 | 0.00655 | 12.44             | 0.43            | Ccni          |
| 1448364_at             | 3.56           | 0.00122 | 0.00656 | 5.42              | 0.78            | Ccng2         |
| 1437106_at             | 3.56           | 0.00122 | 0.00657 | 7.05              | 0.72            | Jarid1a       |
| 1437797_at             | 3.56           | 0.00122 | 0.00657 | 6.25              | 0.94            | Atp2a2        |
| 1458469_at             | 3.56           | 0.00122 | 0.00658 | 6.87              | 0.92            | Cblb          |
| 1421622_a_at           | 3.56           | 0.00123 | 0.0066  | 9.48              | 0.58            | Rapgef4       |
| 1442124_at             | 3.56           | 0.00123 | 0.0066  | 8.97              | 0.6             | NA            |
| 1424359_at             | 3.55           | 0.00125 | 0.00667 | 10.09             | 0.6             | Oplah         |
| 1430476_at             | 3.55           | 0.00125 | 0.00667 | 4.76              | 1.12            | Srp54b        |
| 1426444_at             | 3.55           | 0.00125 | 0.00668 | 3.69              | 0.8             | Rhbdd2        |
| 1420479_a_at           | 3.55           | 0.00126 | 0.00671 | 9.48              | 0.52            | Nap1l1        |
| 1452844_at             | 3.55           | 0.00127 | 0.00676 | 5.1               | 0.79            | Pou6f1        |
| 1440658_at             | 3.54           | 0.00127 | 0.00679 | 5.16              | 1.1             | Ammeacr1l     |
| 1428299_at             | 3.54           | 0.00128 | 0.00681 | 7.29              | 0.79            | Dyrk1a        |
| 1456251_x_at           | 3.54           | 0.00129 | 0.00683 | 9.01              | 0.61            | Tspo          |
| 1418244_at             | 3.54           | 0.00129 | 0.00683 | 9.47              | 0.54            | Nat5          |
| 1421917_at             | 3.54           | 0.00129 | 0.00684 | 8.6               | 0.69            | Pdgfra        |
| 1426813_at             | 3.53           | 0.00131 | 0.00692 | 9.01              | 0.6             | Ltv1          |
| 1451199_at             | 3.53           | 0.00132 | 0.00695 | 7.19              | 0.84            | Qtrtd1        |
| 1417126_a_at           | 3.53           | 0.00132 | 0.00697 | 11.76             | 0.51            | Rpl22l1       |
| 1424318_at             | 3.53           | 0.00133 | 0.00702 | 9.18              | 0.56            | 1110067D22Rik |
| 1452626_a_at           | 3.53           | 0.00133 | 0.00702 | 8.69              | 0.65            | 1810014F10Rik |
| 1423696_a_at           | 3.53           | 0.00134 | 0.00703 | 12.42             | 0.39            | Psm6          |
| 1439097_at             | 3.53           | 0.00134 | 0.00703 | 4.06              | 0.93            | D10Wsu52e     |
| 1417125_at             | 3.52           | 0.00134 | 0.00704 | 14.08             | 0.37            | Ahcy          |
| 1438459_x_at           | 3.52           | 0.00135 | 0.00705 | 8.68              | 0.58            | Sfpq          |
| 1437357_at             | 3.52           | 0.00135 | 0.00709 | 7.41              | 0.67            | Ythdc2        |
| 1423666_s_at           | 3.52           | 0.00136 | 0.0071  | 8.58              | 0.6             | Rpl5          |
| 1420889_at             | 3.52           | 0.00136 | 0.0071  | 6.63              | 0.85            | Hccs          |
| 1442109_at             | 3.51           | 0.00138 | 0.00718 | 7.17              | 0.84            | NA            |
| 1452628_at             | 3.51           | 0.00138 | 0.00721 | 7.35              | 0.78            | Bag5          |
| 1419075_s_at           | 3.51           | 0.00139 | 0.00721 | 11.11             | 1.41            | Saa2          |
| X-PyruCarbMur/L09192_! | 3.51           | 0.00139 | 0.00721 | 6.34              | 0.84            | Pcx           |
| 1438420_at             | 3.51           | 0.0014  | 0.00728 | 10.04             | 0.57            | Rbm39         |
| 1454418_at             | 3.51           | 0.00141 | 0.00731 | 2.9               | 0.57            | 5330421C15Rik |
| 1440925_at             | 3.51           | 0.00141 | 0.00731 | 3.55              | 0.67            | NA            |
| 1429351_at             | 3.5            | 0.00142 | 0.00735 | 9.04              | 0.59            | Klhl24        |
| 1416849_at             | 3.5            | 0.00144 | 0.00743 | 12.24             | 0.45            | Cisd1         |
| 1457712_at             | 3.5            | 0.00144 | 0.00744 | 5.47              | 0.97            | AW549269      |
| 1449369_at             | 3.5            | 0.00144 | 0.00745 | 5.87              | 0.82            | Tmprss2       |
| 1436322_a_at           | 3.5            | 0.00144 | 0.00745 | 8.15              | 0.66            | 2810001A02Rik |
| 1437513_a_at           | 3.5            | 0.00145 | 0.00746 | 9.19              | 0.72            | Serinc1       |
| 1439094_at             | 3.5            | 0.00145 | 0.00746 | 6.73              | 0.81            | Cltc          |
| 1430038_at             | 3.5            | 0.00145 | 0.00747 | 7.69              | 0.68            | Gphn          |
| 1440020_at             | 3.49           | 0.00145 | 0.00749 | 4.53              | 0.98            | Rlf           |
| 1450007_at             | 3.49           | 0.00146 | 0.00749 | 10.37             | 0.6             | 1500003O03Rik |
| 1439795_at             | 3.49           | 0.00146 | 0.00751 | 4.86              | 1.15            | Gpr64         |
| 1455826_a_at           | 3.49           | 0.00147 | 0.00755 | 9.07              | 0.63            | Bace1         |
| 1437049_at             | 3.49           | 0.00147 | 0.00755 | 4.29              | 0.78            | NA            |
| 1456717_at             | 3.49           | 0.00147 | 0.00755 | 3.69              | 1.19            | Tead1         |

| Probe <sup>1</sup> | t <sup>2</sup> | p-value | q-value | Mean <sup>3</sup> | FC <sup>4</sup> | Symbol        |
|--------------------|----------------|---------|---------|-------------------|-----------------|---------------|
| 1416488_at         | 3.49           | 0.00147 | 0.00756 | 9.49              | 0.55            | Ccng2         |
| 1453840_at         | 3.49           | 0.00148 | 0.00758 | 5.58              | 1.18            | Pabpc1        |
| 1456567_x_at       | 3.49           | 0.00148 | 0.00758 | 12.39             | 0.43            | Grn           |
| 1459618_at         | 3.49           | 0.00148 | 0.00759 | 3.24              | 0.64            | Trex1         |
| 1440841_at         | 3.49           | 0.00149 | 0.00761 | 4.61              | 0.81            | Ywhae         |
| 1448422_at         | 3.48           | 0.00149 | 0.00764 | 11.42             | 0.56            | Tmed4         |
| 1460614_at         | 3.48           | 0.0015  | 0.00764 | 8.4               | 0.67            | Mier3         |
| 1443742_x_at       | 3.48           | 0.0015  | 0.00766 | 3.49              | 0.66            | Ube2r2        |
| 1438890_at         | 3.48           | 0.00151 | 0.00768 | 4.98              | 0.86            | Fbxl11        |
| 1448403_at         | 3.48           | 0.00151 | 0.0077  | 8.85              | 0.58            | Lars          |
| 1437206_at         | 3.48           | 0.00152 | 0.00775 | 5.08              | 0.81            | Setd5         |
| 1429396_at         | 3.48           | 0.00153 | 0.00778 | 3.56              | 1.13            | Atg16l2       |
| 1425645_s_at       | 3.48           | 0.00153 | 0.00778 | 8.38              | 2.88            | Cyp2b10       |
| 1429588_at         | 3.47           | 0.00154 | 0.00779 | 8.27              | 0.99            | 2810474O19Rik |
| 1460053_at         | 3.47           | 0.00154 | 0.00779 | 4.44              | 0.82            | Smyd4         |
| 1454905_at         | 3.47           | 0.00154 | 0.0078  | 8.94              | 0.67            | Ibtk          |
| 1428832_at         | 3.47           | 0.00154 | 0.00781 | 7.99              | 0.69            | 1600002H07Rik |
| 1435459_at         | 3.47           | 0.00155 | 0.00782 | 8.5               | 0.69            | Fmo2          |
| 1450744_at         | 3.47           | 0.00156 | 0.00786 | 11.77             | 0.52            | Eli2          |
| 1445697_at         | 3.47           | 0.00156 | 0.00788 | 3.14              | 0.52            | Ddef2         |
| 1435372_a_at       | 3.47           | 0.00156 | 0.00788 | 9.59              | 0.55            | Pa2g4         |
| 1457765_at         | 3.47           | 0.00156 | 0.0079  | 3.63              | 0.73            | Psmd14        |
| 1437271_at         | 3.47           | 0.00157 | 0.00794 | 4.07              | 0.74            | Clcf1         |
| 1438000_x_at       | 3.46           | 0.0016  | 0.00803 | 10.6              | 0.52            | Zfp622        |
| 1434613_at         | 3.46           | 0.0016  | 0.00806 | 9.87              | 0.52            | 1810013L24Rik |
| 1418603_at         | 3.46           | 0.00161 | 0.00806 | 8.55              | 0.66            | Avpr1a        |
| 1427002_s_at       | 3.46           | 0.00161 | 0.00807 | 7.37              | 0.84            | Arsg          |
| 1422904_at         | 3.46           | 0.00161 | 0.00809 | 6.67              | 1               | Fmo2          |
| 1416409_at         | 3.45           | 0.00162 | 0.0081  | 13.22             | 0.54            | Acox1         |
| 1424406_at         | 3.45           | 0.00162 | 0.00812 | 7.35              | 0.85            | Bcl2l13       |
| 1417023_a_at       | 3.45           | 0.00163 | 0.00814 | 7.74              | 1.13            | Fabp4         |
| 1455171_at         | 3.45           | 0.00164 | 0.00819 | 7.23              | 0.85            | Suv420h1      |
| 1442535_at         | 3.45           | 0.00165 | 0.00821 | 3.41              | 0.63            | Zfp609        |
| 1457788_at         | 3.45           | 0.00165 | 0.00824 | 4.58              | 1.04            | Rassf1        |
| 1436145_at         | 3.44           | 0.00166 | 0.00827 | 4.66              | 0.79            | Igf2bp3       |
| 1446693_at         | 3.44           | 0.00166 | 0.00827 | 2.89              | 0.51            | NA            |
| 1455800_x_at       | 3.44           | 0.00166 | 0.00827 | 11.58             | 0.53            | Samm50        |
| 1432944_at         | 3.44           | 0.00167 | 0.00829 | 4.41              | 0.85            | 2900046L07Rik |
| 1452119_at         | 3.44           | 0.00167 | 0.00829 | 3.66              | 0.6             | Rrp1b         |
| 1420138_at         | 3.44           | 0.00167 | 0.00829 | 5.59              | 0.89            | Slc19a1       |
| 1419006_s_at       | 3.44           | 0.00167 | 0.0083  | 3.24              | 0.51            | Peli2         |
| 1460021_at         | 3.44           | 0.00167 | 0.0083  | 4.97              | 0.82            | EG626231      |
| 1423675_at         | 3.44           | 0.00168 | 0.00832 | 5.99              | 0.82            | Usp1          |
| 1438991_x_at       | 3.44           | 0.00169 | 0.00836 | 11.29             | 0.49            | Ppp2r1a       |
| 1418428_at         | 3.44           | 0.0017  | 0.00837 | 9.66              | 0.49            | Kif5b         |
| 1447691_x_at       | 3.43           | 0.00172 | 0.00847 | 5.34              | 1.21            | NA            |
| 1424141_at         | 3.43           | 0.00174 | 0.00858 | 10.46             | 0.47            | Hectd1        |
| 1428869_at         | 3.42           | 0.00176 | 0.00863 | 5.38              | 0.99            | Nolc1         |
| 1417353_x_at       | 3.42           | 0.00176 | 0.00864 | 9.38              | 0.56            | Snrpa1        |
| 1425021_a_at       | 3.42           | 0.00176 | 0.00864 | 10.67             | 0.51            | Pex16         |
| 1430585_at         | 3.42           | 0.00177 | 0.00866 | 5.04              | 0.87            | 5930436O19Rik |
| 1415723_at         | 3.42           | 0.00177 | 0.00867 | 11.69             | 0.52            | Eif5          |
| 1429749_at         | 3.42           | 0.00177 | 0.00869 | 7.67              | 0.71            | 9330180L21Rik |

| Probe <sup>1</sup> | t <sup>2</sup> | p-value | q-value | Mean <sup>3</sup> | FC <sup>4</sup> | Symbol        |
|--------------------|----------------|---------|---------|-------------------|-----------------|---------------|
| 1442920_at         | 3.42           | 0.00178 | 0.00869 | 3.03              | 0.82            | Klf3          |
| 1451003_at         | 3.42           | 0.00178 | 0.00872 | 9.28              | 0.59            | Map3k7ip2     |
| 1455240_x_at       | 3.42           | 0.0018  | 0.00876 | 9.91              | 0.7             | LOC666185     |
| 1430388_a_at       | 3.41           | 0.0018  | 0.00877 | 7.42              | 0.73            | Sulf2         |
| 1424609_a_at       | 3.41           | 0.00181 | 0.00879 | 10.86             | 0.63            | LOC545174     |
| 1433767_at         | 3.41           | 0.00181 | 0.0088  | 8.09              | 0.64            | 1110018G07Rik |
| 1459687_x_at       | 3.41           | 0.00182 | 0.00886 | 4.18              | 0.72            | Cpsf6         |
| 1452397_at         | 3.41           | 0.00183 | 0.00889 | 5.5               | 1.04            | 2810474O19Rik |
| 1445181_at         | 3.4            | 0.00186 | 0.00899 | 4.1               | 0.74            | Eml5          |
| 1428332_at         | 3.4            | 0.00187 | 0.00904 | 3.38              | 0.62            | Pik3ip1       |
| 1449734_s_at       | 3.4            | 0.00187 | 0.00904 | 5.46              | 0.87            | Bbs4          |
| 1416014_at         | 3.4            | 0.00188 | 0.00905 | 9.57              | 0.51            | Abce1         |
| 1423100_at         | 3.39           | 0.0019  | 0.00913 | 5.54              | 2.01            | Fos           |
| 1459363_at         | 3.39           | 0.00191 | 0.00919 | 6.01              | 0.9             | Atxn2         |
| 1460420_a_at       | 3.39           | 0.00191 | 0.00919 | 7.78              | 1.12            | Egfr          |
| 1440365_at         | 3.39           | 0.00193 | 0.00922 | 4.92              | 1.11            | Actb          |
| 1448158_at         | 3.39           | 0.00193 | 0.00922 | 9.65              | 0.56            | Sdc1          |
| 1420618_at         | 3.39           | 0.00193 | 0.00922 | 11.67             | 0.67            | Cpeb4         |
| 1429170_a_at       | 3.38           | 0.00195 | 0.00931 | 5.43              | 0.85            | Mtf1          |
| 1453119_at         | 3.38           | 0.00196 | 0.00933 | 5.68              | 0.89            | Otud1         |
| 1441556_at         | 3.38           | 0.00196 | 0.00934 | 4.95              | 0.91            | LOC667106     |
| 1429594_at         | 3.38           | 0.00196 | 0.00936 | 3.55              | 0.78            | Slc38a2       |
| 1429373_x_at       | 3.38           | 0.00197 | 0.00937 | 4.78              | 0.7             | Crtc2         |
| 1434460_at         | 3.38           | 0.00197 | 0.00938 | 4.2               | 0.79            | Bbs4          |
| 1424123_at         | 3.38           | 0.00197 | 0.00938 | 6.3               | 1.08            | Flvcr2        |
| 1451752_at         | 3.38           | 0.00197 | 0.00938 | 2.86              | 0.54            | Foxk1         |
| 1422257_s_at       | 3.38           | 0.00198 | 0.00938 | 7.94              | 2.8             | Cyp2b10       |
| 1450264_a_at       | 3.38           | 0.00198 | 0.00938 | 7.11              | 0.79            | Chka          |
| 1459657_s_at       | 3.38           | 0.00198 | 0.0094  | 9.33              | 0.55            | LOC100039220  |
| 1438955_x_at       | 3.38           | 0.00199 | 0.00943 | 8.39              | 0.55            | Ppif          |
| 1451334_at         | 3.38           | 0.00199 | 0.00943 | 6.95              | 0.76            | 1810009O10Rik |
| 1438222_at         | 3.38           | 0.00199 | 0.00945 | 5.16              | 0.91            | D2Ertd612e    |
| 1440903_at         | 3.37           | 0.00201 | 0.00951 | 4.61              | 0.87            | Herc1         |
| 1456775_at         | 3.37           | 0.00202 | 0.00955 | 3.22              | 0.76            | Ints8         |
| 1427638_at         | 3.37           | 0.00203 | 0.00956 | 4.4               | 0.96            | Zbtb16        |
| 1456383_at         | 3.37           | 0.00204 | 0.00962 | 9.07              | 0.52            | Rsl1d1        |
| 1460409_at         | 3.37           | 0.00205 | 0.00965 | 12.38             | 0.47            | Cpt1a         |
| 1448148_at         | 3.36           | 0.00206 | 0.00968 | 11.43             | 0.51            | Grn           |
| 1436337_at         | 3.36           | 0.00206 | 0.00968 | 11.25             | 0.52            | 4930420K17Rik |
| 1424030_at         | 3.36           | 0.00208 | 0.00975 | 3.4               | 0.73            | Grhl1         |
| 1441359_at         | 3.36           | 0.0021  | 0.00983 | 3.98              | 0.76            | NA            |
| 1457056_at         | 3.36           | 0.0021  | 0.00985 | 4.13              | 0.7             | Ftcd          |
| 1423462_at         | 3.36           | 0.00211 | 0.00985 | 11.3              | 0.51            | Map3k7ip2     |
| 1418192_at         | 3.35           | 0.00212 | 0.0099  | 4.78              | 0.73            | Mnt           |
| 1424883_s_at       | 3.35           | 0.00214 | 0.01    | 10.42             | 0.48            | Sfrs7         |

| Probe <sup>1</sup> | t <sup>2</sup> | p-value | q-value | Mean <sup>3</sup> | FC <sup>4</sup> | Symbol |
|--------------------|----------------|---------|---------|-------------------|-----------------|--------|
|--------------------|----------------|---------|---------|-------------------|-----------------|--------|

**Table S2a. Footnote**

Gene lists were generated using the Cyber-T method, with only genes with a *q*-value < 0.01 presented.

<sup>1</sup> *Probe* represents the Affymetrix probe set identifier.

<sup>2</sup> *t* represents the t-statistic output from the Cyber-T method.

<sup>3</sup> *Mean* represents the mean expression signal after normalization.

<sup>4</sup> *FC* represents the log<sub>2</sub> fold change in normalized signals.

---

**Table S2b.** Genes downregulated in liver of *S6K<sup>-/-</sup>* mice compared to wild type mice.

| Probe <sup>1</sup> | t <sup>2</sup> | p-value  | q-value  | Mean <sup>3</sup> | FC <sup>4</sup> | Symbol        |
|--------------------|----------------|----------|----------|-------------------|-----------------|---------------|
| 1460705_at         | -20.04         | 2.67E-19 | 3.20E-15 | 5.38              | 3.85            | Rps6kb1       |
| 1454956_at         | -14.73         | 1.52E-15 | 3.77E-12 | 4.79              | 3.07            | Rps6kb1       |
| 1457306_at         | -13.25         | 2.60E-14 | 3.89E-11 | 5.59              | 3.56            | NA            |
| 1448506_at         | -11.62         | 7.96E-13 | 6.81E-10 | 11.58             | 3.32            | Serpina6      |
| 1418174_at         | -11.03         | 2.96E-12 | 2.09E-09 | 6.24              | 3.48            | Dbp           |
| 1456319_at         | -10.89         | 4.06E-12 | 2.56E-09 | 5.81              | 3               | EG665081      |
| 1417404_at         | -10.19         | 2.03E-11 | 9.03E-09 | 7.82              | 2.47            | Elovl6        |
| 1423078_a_at       | -10.1          | 2.52E-11 | 1.04E-08 | 10.71             | 2.37            | Sc4mol        |
| 1438211_s_at       | -10.08         | 2.67E-11 | 1.07E-08 | 8.49              | 2.83            | Dbp           |
| 1456812_at         | -10            | 3.24E-11 | 1.23E-08 | 7.95              | 2.06            | Abcd2         |
| 1434520_at         | -9.57          | 9.00E-11 | 2.77E-08 | 8.77              | 3.08            | Sc5d          |
| 1455383_at         | -9.56          | 9.23E-11 | 2.77E-08 | 5.68              | 3.39            | Gm1381        |
| 1448130_at         | -9.46          | 1.20E-10 | 3.34E-08 | 9.73              | 1.87            | Fdft1         |
| 1432282_a_at       | -9.27          | 1.89E-10 | 5.04E-08 | 10.16             | 1.56            | 2010305C02Rik |
| 1438322_x_at       | -9.08          | 3.05E-10 | 7.32E-08 | 10.87             | 1.86            | Fdft1         |
| 1429239_a_at       | -9.05          | 3.32E-10 | 7.53E-08 | 7.84              | 2.17            | Stard4        |
| 1437479_x_at       | -8.97          | 4.03E-10 | 8.79E-08 | 6.97              | 3.09            | Tbx3          |
| 1436162_at         | -8.91          | 4.71E-10 | 9.90E-08 | 9.73              | 1.65            | C730048C13Rik |
| 1443698_at         | -8.86          | 5.27E-10 | 1.07E-07 | 5.91              | 2.24            | Xaf1          |
| 1415993_at         | -8.76          | 6.78E-10 | 1.35E-07 | 7.8               | 2.63            | Sqle          |
| 1423418_at         | -8.72          | 7.63E-10 | 1.46E-07 | 9.47              | 2.69            | Fdps          |
| 1420928_at         | -8.68          | 8.39E-10 | 1.54E-07 | 10.42             | 1.34            | St6gal1       |
| 1460256_at         | -8.68          | 8.47E-10 | 1.54E-07 | 11.09             | 2.9             | Car3          |
| 1428670_at         | -8.66          | 8.93E-10 | 1.57E-07 | 4.46              | 2.16            | 2610305J24Rik |
| 1451122_at         | -8.57          | 1.10E-09 | 1.90E-07 | 9.98              | 2.37            | Idi1          |
| 1427410_at         | -8.56          | 1.15E-09 | 1.90E-07 | 8.95              | 1.62            | Dleu2         |
| 1425387_at         | -8.55          | 1.16E-09 | 1.90E-07 | 11.71             | 1.55            | Akr1c20       |
| 1416840_at         | -8.55          | 1.18E-09 | 1.90E-07 | 7.74              | 2.74            | Mid1ip1       |
| 1429240_at         | -8.55          | 1.19E-09 | 1.90E-07 | 8.26              | 2.2             | Stard4        |
| 1459948_at         | -8.53          | 1.25E-09 | 1.95E-07 | 6.12              | 3.36            | Ghr           |
| 1434859_at         | -8.51          | 1.31E-09 | 2.00E-07 | 7.23              | 1.79            | Umps          |
| 1449434_at         | -8.42          | 1.64E-09 | 2.46E-07 | 13.47             | 2.12            | Car3          |
| 1433954_at         | -8.41          | 1.69E-09 | 2.48E-07 | 7.03              | 1.83            | 4632419I22Rik |
| 1416258_at         | -8.37          | 1.87E-09 | 2.71E-07 | 3.96              | 2.16            | Tk1           |
| 1441102_at         | -8.35          | 1.98E-09 | 2.79E-07 | 7.3               | 2.5             | Prlr          |
| 1418923_at         | -8.33          | 2.05E-09 | 2.86E-07 | 8.42              | 1.81            | Slc17a3       |
| 1418979_at         | -8.32          | 2.13E-09 | 2.94E-07 | 11.96             | 1.39            | Akr1c14       |
| 1417667_a_at       | -8.27          | 2.44E-09 | 3.30E-07 | 10.08             | 1.39            | Pter          |
| 1451418_a_at       | -8.27          | 2.45E-09 | 3.30E-07 | 4.65              | 2.55            | Spsb4         |
| 1423797_at         | -8.26          | 2.48E-09 | 3.31E-07 | 4.65              | 2.98            | Aacs          |
| 1455011_at         | -8.25          | 2.54E-09 | 3.31E-07 | 8.68              | 1.87            | Stard4        |
| 1443147_at         | -8.16          | 3.23E-09 | 4.07E-07 | 11.33             | 1.51            | Acot3         |
| 1448556_at         | -8.15          | 3.29E-09 | 4.08E-07 | 8.69              | 2.09            | Prlr          |
| 1422533_at         | -8.15          | 3.30E-09 | 4.08E-07 | 8.47              | 2.25            | Cyp51         |
| 1449409_at         | -8.12          | 3.55E-09 | 4.35E-07 | 6.02              | 3.17            | Sult1c2       |
| 1419573_a_at       | -8.11          | 3.69E-09 | 4.47E-07 | 8.19              | 2.4             | Lgals1        |
| 1427008_at         | -8.1           | 3.81E-09 | 4.57E-07 | 4.55              | 2.47            | Rnf43         |
| 1430785_at         | -8.07          | 4.11E-09 | 4.88E-07 | 6.18              | 2.78            | Rdh20         |
| 1451457_at         | -8.06          | 4.20E-09 | 4.94E-07 | 11.94             | 1.41            | Sc5d          |
| 1439114_at         | -7.99          | 5.12E-09 | 5.83E-07 | 4.18              | 1.64            | Ddx60         |
| 1456074_at         | -7.98          | 5.20E-09 | 5.83E-07 | 6.47              | 2.61            | Rdh20         |

| Probe <sup>1</sup> | t <sup>2</sup> | p-value  | q-value  | Mean <sup>3</sup> | FC <sup>4</sup> | Symbol        |
|--------------------|----------------|----------|----------|-------------------|-----------------|---------------|
| 1453042_at         | -7.95          | 5.60E-09 | 6.21E-07 | 7.5               | 2.07            | Anks4b        |
| 1438743_at         | -7.93          | 5.89E-09 | 6.37E-07 | 10.14             | 3.42            | Cyp7a1        |
| 1420841_at         | -7.92          | 6.04E-09 | 6.47E-07 | 7.18              | 1.69            | Ptprf         |
| 1425343_at         | -7.88          | 6.75E-09 | 6.97E-07 | 4.83              | 1.84            | Hdhd3         |
| 1455439_a_at       | -7.86          | 7.10E-09 | 7.12E-07 | 9.13              | 2.03            | Lgals1        |
| 1442633_at         | -7.86          | 7.11E-09 | 7.12E-07 | 3.91              | 1.9             | NA            |
| 1424531_a_at       | -7.86          | 7.19E-09 | 7.12E-07 | 7.71              | 1.79            | Tcea3         |
| 1418763_at         | -7.82          | 7.93E-09 | 7.73E-07 | 10.37             | 1.69            | Nit2          |
| 1420842_at         | -7.81          | 8.28E-09 | 8.00E-07 | 9.59              | 1.44            | Ptprf         |
| 1422558_at         | -7.79          | 8.72E-09 | 8.37E-07 | 9.55              | 1.82            | Gamt          |
| 1419525_at         | -7.78          | 8.81E-09 | 8.38E-07 | 7.04              | 2.39            | Car5a         |
| 1434442_at         | -7.75          | 9.56E-09 | 9.02E-07 | 9.59              | 1.24            | Stbd1         |
| 1429272_a_at       | -7.72          | 1.04E-08 | 9.76E-07 | 8.83              | 2.37            | Apol7a        |
| 1425746_at         | -7.57          | 1.55E-08 | 1.41E-06 | 7.16              | 2.24            | D730039F16Rik |
| 1441926_x_at       | -7.54          | 1.68E-08 | 1.48E-06 | 4.81              | 2.12            | Tmie          |
| 1417085_at         | -7.51          | 1.83E-08 | 1.59E-06 | 13.12             | 1.43            | Akr1c6        |
| 1418013_at         | -7.51          | 1.83E-08 | 1.59E-06 | 9.61              | 1.64            | Cml1          |
| 1451666_at         | -7.5           | 1.90E-08 | 1.62E-06 | 9.92              | 1.28            | Acly          |
| 1453080_at         | -7.48          | 1.99E-08 | 1.68E-06 | 10.39             | 1.96            | Apol7a        |
| 1425742_a_at       | -7.43          | 2.27E-08 | 1.87E-06 | 9.7               | 1.5             | Tsc22d1       |
| 1417403_at         | -7.43          | 2.30E-08 | 1.87E-06 | 7.45              | 1.74            | Elov16        |
| 1433443_a_at       | -7.41          | 2.41E-08 | 1.92E-06 | 11.99             | 1.5             | Hmgcs1        |
| 1447927_at         | -7.38          | 2.64E-08 | 2.03E-06 | 6.93              | 3.82            | Mpa2l         |
| 1451419_at         | -7.37          | 2.65E-08 | 2.03E-06 | 3.65              | 1.64            | Spsb4         |
| 1451635_at         | -7.33          | 3.03E-08 | 2.23E-06 | 8.35              | 1.78            | AB056442      |
| 1419043_a_at       | -7.27          | 3.57E-08 | 2.50E-06 | 12.7              | 1.07            | Iigp1         |
| 1437397_at         | -7.23          | 3.94E-08 | 2.70E-06 | 7.97              | 1.98            | Prlr          |
| 1418862_at         | -7.21          | 4.13E-08 | 2.80E-06 | 10.13             | 1.42            | Echdc3        |
| 1431916_at         | -7.2           | 4.23E-08 | 2.85E-06 | 5.45              | 2.59            | Hsd3b3        |
| 1428849_at         | -7.19          | 4.44E-08 | 2.98E-06 | 3.48              | 1.21            | Rps6kb1       |
| 1448698_at         | -7.16          | 4.73E-08 | 3.15E-06 | 9.55              | 1.36            | Ccnd1         |
| 1419318_at         | -7.14          | 4.97E-08 | 3.26E-06 | 10.85             | 1.32            | Saa4          |
| 1430401_at         | -7.14          | 5.01E-08 | 3.26E-06 | 3.94              | 1.57            | 3110045C21Rik |
| 1457403_at         | -7.14          | 5.03E-08 | 3.26E-06 | 8                 | 1.48            | 9130409I23Rik |
| 1418787_at         | -7.13          | 5.15E-08 | 3.32E-06 | 13                | 1.02            | Mbl2          |
| 1425222_x_at       | -7.11          | 5.48E-08 | 3.48E-06 | 8.79              | 1.6             | AB056442      |
| 1449817_at         | -7.11          | 5.51E-08 | 3.48E-06 | 10.74             | 1.23            | Abcb11        |
| 1428859_at         | -7.09          | 5.72E-08 | 3.58E-06 | 6.99              | 2.14            | Paox          |
| 1426276_at         | -7.08          | 5.88E-08 | 3.65E-06 | 9.15              | 1.42            | Ifih1         |
| 1453578_at         | -7.06          | 6.33E-08 | 3.90E-06 | 6.16              | 1.96            | Pter          |
| 1451655_at         | -7.06          | 6.35E-08 | 3.90E-06 | 3.72              | 1.46            | Slfn8         |
| 1426584_a_at       | -7.05          | 6.46E-08 | 3.95E-06 | 13.25             | 0.83            | Sord          |
| 1428113_at         | -7.03          | 6.80E-08 | 4.10E-06 | 7.34              | 1.66            | Tmtc4         |
| 1428229_at         | -7.01          | 7.30E-08 | 4.38E-06 | 10.27             | 1.24            | Prkd3         |
| 1427474_s_at       | -7             | 7.39E-08 | 4.39E-06 | 9.47              | 2.26            | Gstm3         |
| 1438711_at         | -6.99          | 7.52E-08 | 4.41E-06 | 8.26              | 1.48            | Pklr          |
| 1448539_a_at       | -6.99          | 7.53E-08 | 4.41E-06 | 8.57              | 1.56            | Acy3          |
| 1433446_at         | -6.98          | 7.74E-08 | 4.51E-06 | 10.2              | 1.59            | Hmgcs1        |
| 1448632_at         | -6.98          | 7.79E-08 | 4.51E-06 | 8.21              | 1.59            | Psmb10        |
| 1419751_x_at       | -6.98          | 7.90E-08 | 4.51E-06 | 8.84              | 1.53            | AB056442      |
| 1437119_at         | -6.97          | 8.04E-08 | 4.53E-06 | 8.83              | 1.7             | Ern1          |
| 1423804_a_at       | -6.95          | 8.49E-08 | 4.71E-06 | 10.39             | 1.98            | Idi1          |
| 1439831_at         | -6.92          | 9.14E-08 | 5.01E-06 | 11.24             | 1.33            | EG240327      |



| Probe <sup>1</sup> | t <sup>2</sup> | p-value  | q-value  | Mean <sup>3</sup> | FC <sup>4</sup> | Symbol        |
|--------------------|----------------|----------|----------|-------------------|-----------------|---------------|
| 1437654_at         | -6.9           | 9.87E-08 | 5.33E-06 | 7.03              | 1.62            | 3110001K24Rik |
| 1425853_s_at       | -6.89          | 9.96E-08 | 5.35E-06 | 10.83             | 1.58            | Prlr          |
| 1417766_at         | -6.89          | 9.99E-08 | 5.35E-06 | 10.26             | 1.1             | Cyb5b         |
| 1427231_at         | -6.86          | 1.08E-07 | 5.74E-06 | 7.77              | 2               | Robo1         |
| 1422826_at         | -6.85          | 1.11E-07 | 5.88E-06 | 8.89              | 1.53            | Igfals        |
| 1418858_at         | -6.84          | 1.14E-07 | 6.00E-06 | 10.07             | 1.45            | Aox3          |
| 1448663_s_at       | -6.84          | 1.15E-07 | 6.00E-06 | 3.91              | 2.48            | Mvd           |
| 1418028_at         | -6.83          | 1.19E-07 | 6.17E-06 | 7.04              | 3.41            | Dct           |
| 1427411_s_at       | -6.83          | 1.20E-07 | 6.18E-06 | 8.12              | 1.34            | Dleu2         |
| 1422100_at         | -6.81          | 1.25E-07 | 6.37E-06 | 8.18              | 2.8             | Cyp7a1        |
| 1424758_s_at       | -6.81          | 1.27E-07 | 6.38E-06 | 11.55             | 1.02            | Serpina10     |
| 1418052_at         | -6.8           | 1.30E-07 | 6.51E-06 | 3.91              | 2.01            | Mvk           |
| 1438676_at         | -6.78          | 1.38E-07 | 6.80E-06 | 7.63              | 2.79            | Mpa2l         |
| 1425829_a_at       | -6.74          | 1.51E-07 | 7.40E-06 | 7.65              | 1.59            | Steap4        |
| 1438596_at         | -6.74          | 1.53E-07 | 7.41E-06 | 6.63              | 2.97            | Hectd2        |
| 1454758_a_at       | -6.71          | 1.65E-07 | 7.91E-06 | 9.37              | 1.55            | Tsc22d1       |
| 1422631_at         | -6.7           | 1.69E-07 | 8.05E-06 | 9.94              | 1.27            | Ahr           |
| 1459141_at         | -6.7           | 1.69E-07 | 8.05E-06 | 7.69              | 2.44            | 1810008I18Rik |
| 1451588_at         | -6.69          | 1.75E-07 | 8.26E-06 | 4.74              | 3.58            | 1810022C23Rik |
| 1418654_at         | -6.69          | 1.76E-07 | 8.26E-06 | 9.75              | 4.18            | Hao3          |
| 1424210_at         | -6.68          | 1.81E-07 | 8.43E-06 | 8.57              | 1.33            | Erlin1        |
| 1425326_at         | -6.67          | 1.88E-07 | 8.71E-06 | 7.28              | 1.71            | Acly          |
| 1420843_at         | -6.66          | 1.93E-07 | 8.82E-06 | 10.02             | 1.17            | Ptprf         |
| 1416362_a_at       | -6.65          | 1.95E-07 | 8.86E-06 | 9.28              | 1.1             | Fkbp4         |
| 1428230_at         | -6.65          | 1.97E-07 | 8.93E-06 | 9.79              | 1.31            | Prkd3         |
| 1418162_at         | -6.64          | 2.00E-07 | 8.94E-06 | 4.48              | 1.64            | Tlr4          |
| 1456941_at         | -6.64          | 2.00E-07 | 8.94E-06 | 4.56              | 1.57            | Tert          |
| 1455065_x_at       | -6.64          | 2.01E-07 | 8.94E-06 | 8.89              | 1.62            | EG667410      |
| 1429065_at         | -6.62          | 2.12E-07 | 9.30E-06 | 3.65              | 1.5             | 1200009F10Rik |
| 1448844_at         | -6.62          | 2.15E-07 | 9.37E-06 | 8.55              | 1.28            | Cyb5b         |
| 1424857_a_at       | -6.61          | 2.18E-07 | 9.42E-06 | 7.33              | 1.87            | NA            |
| 1417420_at         | -6.6           | 2.24E-07 | 9.61E-06 | 9.81              | 1.09            | Ccnd1         |
| 1417962_s_at       | -6.58          | 2.36E-07 | 9.94E-06 | 12.56             | 1.48            | Ghr           |
| 1451777_at         | -6.58          | 2.37E-07 | 9.96E-06 | 5.78              | 2.03            | Ddx60         |
| 1449983_a_at       | -6.58          | 2.39E-07 | 9.99E-06 | 9.52              | 1.05            | Nqo2          |
| 1448300_at         | -6.56          | 2.51E-07 | 1.04E-05 | 7.98              | 1.5             | Mgst3         |
| 1453206_at         | -6.56          | 2.55E-07 | 1.05E-05 | 8.5               | 1.22            | Acad9         |
| 1448147_at         | -6.55          | 2.61E-07 | 1.07E-05 | 5.36              | 2.07            | Tnfrsf19      |
| 1435694_at         | -6.52          | 2.81E-07 | 1.14E-05 | 5.16              | 1.9             | Arhgap26      |
| 1426059_at         | -6.52          | 2.81E-07 | 1.14E-05 | 10.67             | 1.01            | Gckr          |
| 1423846_x_at       | -6.52          | 2.85E-07 | 1.15E-05 | 11.3              | 1.04            | Tuba1b        |
| 1434715_at         | -6.51          | 2.89E-07 | 1.16E-05 | 4.24              | 1.46            | 1600014C10Rik |
| 1460197_a_at       | -6.51          | 2.92E-07 | 1.16E-05 | 9.65              | 1.15            | Steap4        |
| 1452962_at         | -6.49          | 3.08E-07 | 1.21E-05 | 4.53              | 1.63            | Tmem25        |
| 1436339_at         | -6.48          | 3.17E-07 | 1.23E-05 | 9.61              | 1.23            | 1810058I24Rik |
| 1453421_at         | -6.47          | 3.25E-07 | 1.26E-05 | 4.44              | 1.6             | Srr           |
| 1451871_a_at       | -6.47          | 3.28E-07 | 1.27E-05 | 8.32              | 2.01            | Ghr           |
| 1451229_at         | -6.46          | 3.36E-07 | 1.29E-05 | 7.07              | 1.68            | Hdac11        |
| 1419045_at         | -6.45          | 3.45E-07 | 1.32E-05 | 8.11              | 1.3             | Slc25a23      |
| 1425177_at         | -6.43          | 3.61E-07 | 1.37E-05 | 10.18             | 1.13            | Shmt1         |
| 1421262_at         | -6.42          | 3.78E-07 | 1.41E-05 | 5.74              | 1.57            | Lipg          |
| 1421258_a_at       | -6.41          | 3.81E-07 | 1.42E-05 | 6.58              | 1.56            | Pklr          |
| 1435630_s_at       | -6.41          | 3.85E-07 | 1.43E-05 | 9.9               | 1.17            | Acat2         |

| Probe <sup>1</sup> | t <sup>2</sup> | p-value  | q-value  | Mean <sup>3</sup> | FC <sup>4</sup> | Symbol        |
|--------------------|----------------|----------|----------|-------------------|-----------------|---------------|
| 1420384_at         | -6.4           | 3.99E-07 | 1.47E-05 | 4.86              | 1.57            | Col4a3bp      |
| 1444176_at         | -6.38          | 4.21E-07 | 1.54E-05 | 6.47              | 2.18            | Atp6v0d2      |
| 1436050_x_at       | -6.37          | 4.34E-07 | 1.59E-05 | 7.67              | 1.48            | Hes6          |
| 1442129_at         | -6.36          | 4.46E-07 | 1.62E-05 | 5.47              | 1.77            | 1810058I24Rik |
| 1455590_at         | -6.35          | 4.51E-07 | 1.64E-05 | 9.06              | 1.24            | Nqo2          |
| 1419319_at         | -6.34          | 4.63E-07 | 1.68E-05 | 8.28              | 1.72            | Saa4          |
| 1435665_at         | -6.34          | 4.68E-07 | 1.69E-05 | 8.03              | 1.64            | AI451617      |
| 1428447_at         | -6.33          | 4.87E-07 | 1.75E-05 | 5.53              | 2.07            | Tmem14a       |
| 1433884_at         | -6.32          | 4.99E-07 | 1.78E-05 | 5.27              | 2.07            | Syt1          |
| 1425515_at         | -6.32          | 5.02E-07 | 1.78E-05 | 4.78              | 1.55            | Pik3r1        |
| 1438258_at         | -6.29          | 5.36E-07 | 1.87E-05 | 3.68              | 1.48            | Vldlr         |
| 1427422_at         | -6.26          | 5.79E-07 | 1.99E-05 | 6.68              | 2.46            | EG624219      |
| 1419906_at         | -6.26          | 5.80E-07 | 1.99E-05 | 6.09              | 1.67            | Hpgd          |
| 1424877_a_at       | -6.26          | 5.88E-07 | 2.01E-05 | 11.2              | 0.99            | Alad          |
| 1422061_at         | -6.26          | 5.92E-07 | 2.02E-05 | 6.47              | 1.97            | Akr1c20       |
| 1424709_at         | -6.26          | 5.95E-07 | 2.02E-05 | 4.66              | 1.53            | Sc5d          |
| 1437662_at         | -6.25          | 6.03E-07 | 2.04E-05 | 9.68              | 1.13            | Acsm5         |
| 1453588_at         | -6.25          | 6.11E-07 | 2.05E-05 | 6.2               | 3.69            | Car3          |
| 1427377_x_at       | -6.24          | 6.13E-07 | 2.05E-05 | 6.95              | 2.48            | Hsd3b3        |
| 1458832_at         | -6.24          | 6.19E-07 | 2.07E-05 | 5.33              | 2.49            | Ghr           |
| 1456081_a_at       | -6.23          | 6.37E-07 | 2.12E-05 | 4.45              | 1.95            | Aacs          |
| 1419748_at         | -6.22          | 6.66E-07 | 2.19E-05 | 9.24              | 1.06            | Abcd2         |
| 1426936_at         | -6.21          | 6.69E-07 | 2.19E-05 | 6.15              | 2.85            | LOC215866     |
| 1416222_at         | -6.2           | 7.00E-07 | 2.28E-05 | 8.83              | 2.11            | Nsdhl         |
| 1436943_at         | -6.19          | 7.16E-07 | 2.31E-05 | 4.73              | 1.65            | Cyb5d2        |
| 1417303_at         | -6.19          | 7.23E-07 | 2.33E-05 | 4.34              | 2.17            | Mvd           |
| 1460324_at         | -6.18          | 7.45E-07 | 2.39E-05 | 2.96              | 1.47            | Dnmt3a        |
| 1439459_x_at       | -6.17          | 7.51E-07 | 2.40E-05 | 10.78             | 1.09            | Acly          |
| 1440444_at         | -6.17          | 7.68E-07 | 2.44E-05 | 3.66              | 1.58            | Fads1         |
| 1429298_at         | -6.16          | 7.68E-07 | 2.44E-05 | 9.75              | 1.04            | Ddah1         |
| 1428052_a_at       | -6.16          | 7.76E-07 | 2.46E-05 | 3.19              | 1.26            | Zmym1         |
| 1430814_at         | -6.15          | 8.08E-07 | 2.54E-05 | 4.15              | 1.38            | Cyp2d40       |
| 1453692_at         | -6.13          | 8.40E-07 | 2.62E-05 | 5.75              | 1.84            | 4930581F22Rik |
| 1448649_at         | -6.12          | 8.67E-07 | 2.70E-05 | 11.71             | 0.82            | Enpep         |
| 1433445_x_at       | -6.11          | 8.89E-07 | 2.74E-05 | 12.03             | 1.19            | Hmgcs1        |
| 1429052_at         | -6.11          | 8.92E-07 | 2.74E-05 | 10.19             | 0.94            | Ptprd         |
| 1421379_at         | -6.11          | 8.92E-07 | 2.74E-05 | 4.79              | 1.58            | Zfp354b       |
| 1418580_at         | -6.1           | 9.27E-07 | 2.83E-05 | 8.75              | 1.62            | Rtp4          |
| 1425127_at         | -6.1           | 9.31E-07 | 2.83E-05 | 3.49              | 1.83            | Hsd3b2        |
| 1454971_x_at       | -6.08          | 9.68E-07 | 2.91E-05 | 10.56             | 1.37            | Tsc22d1       |
| 1422230_s_at       | -6.08          | 9.86E-07 | 2.96E-05 | 13.55             | 0.93            | Cyp2a5        |
| 1419905_s_at       | -6.07          | 1.01E-06 | 3.02E-05 | 11.63             | 1.09            | Hpgd          |
| 1438654_x_at       | -6.07          | 1.01E-06 | 3.02E-05 | 7.29              | 1.77            | Mmd2          |
| 1451239_a_at       | -6.07          | 1.02E-06 | 3.03E-05 | 9.72              | 0.95            | Slc26a1       |
| 1443858_at         | -6.06          | 1.04E-06 | 3.07E-05 | 6.9               | 1.83            | NA            |
| 1424303_at         | -6.05          | 1.05E-06 | 3.10E-05 | 9.51              | 1.25            | Depdc7        |
| 1452540_a_at       | -6.05          | 1.06E-06 | 3.10E-05 | 12.98             | 0.74            | Hist1h2bp     |
| 1455541_a_at       | -6.05          | 1.06E-06 | 3.10E-05 | 3.06              | 0.99            | 4430402I18Rik |
| 1433444_at         | -6.05          | 1.07E-06 | 3.11E-05 | 12.06             | 1.13            | Hmgcs1        |
| 1436590_at         | -6.04          | 1.09E-06 | 3.13E-05 | 10.75             | 1.47            | Ppp1r3b       |
| 1417828_at         | -6.04          | 1.09E-06 | 3.13E-05 | 9.38              | 1.32            | Aqp8          |
| 1435097_at         | -6.03          | 1.13E-06 | 3.23E-05 | 4.27              | 1.76            | Mmab          |
| 1425195_a_at       | -6.03          | 1.14E-06 | 3.25E-05 | 10.84             | 1.36            | Acat3         |

| Probe <sup>1</sup> | t <sup>2</sup> | p-value  | q-value  | Mean <sup>3</sup> | FC <sup>4</sup> | Symbol        |
|--------------------|----------------|----------|----------|-------------------|-----------------|---------------|
| 1416543_at         | -6.02          | 1.17E-06 | 3.33E-05 | 9.41              | 1.97            | Nfe2l2        |
| 1426883_at         | -6.01          | 1.21E-06 | 3.41E-05 | 7.17              | 1.34            | Slc25a45      |
| 1436644_x_at       | -6             | 1.23E-06 | 3.46E-05 | 6.38              | 2.12            | Tmem25        |
| 1418601_at         | -5.99          | 1.25E-06 | 3.50E-05 | 12.97             | 1.17            | Aldh1a7       |
| 1451799_at         | -5.96          | 1.38E-06 | 3.82E-05 | 4.76              | 2.45            | Ccdc25        |
| 1438682_at         | -5.96          | 1.39E-06 | 3.84E-05 | 8.01              | 1.41            | Pik3r1        |
| 1456424_s_at       | -5.95          | 1.40E-06 | 3.84E-05 | 11.6              | 0.9             | Pltp          |
| 1445815_at         | -5.95          | 1.40E-06 | 3.85E-05 | 4.27              | 1.72            | Fzd8          |
| 1454862_at         | -5.95          | 1.41E-06 | 3.87E-05 | 9.9               | 1.1             | Phldb2        |
| 1416755_at         | -5.95          | 1.43E-06 | 3.91E-05 | 8.66              | 1.13            | Dnajb1        |
| 1424242_at         | -5.94          | 1.47E-06 | 4.00E-05 | 11.45             | 0.91            | Bphl          |
| 1424953_at         | -5.94          | 1.47E-06 | 4.00E-05 | 6.79              | 1.37            | BC021614      |
| 1428267_at         | -5.93          | 1.48E-06 | 4.02E-05 | 7.8               | 1.09            | Dhx40         |
| 1435405_at         | -5.92          | 1.52E-06 | 4.10E-05 | 4.78              | 1.73            | Setd4         |
| 1425303_at         | -5.9           | 1.62E-06 | 4.34E-05 | 4.61              | 2.35            | Gck           |
| 1451564_at         | -5.9           | 1.62E-06 | 4.34E-05 | 7.23              | 1.63            | Parp14        |
| 1448657_a_at       | -5.87          | 1.75E-06 | 4.63E-05 | 8.48              | 1.14            | Dnajb10       |
| 1426879_at         | -5.86          | 1.81E-06 | 4.73E-05 | 6.41              | 1.5             | 1190005F20Rik |
| 1450883_a_at       | -5.85          | 1.88E-06 | 4.89E-05 | 11.73             | 0.87            | Cd36          |
| 1434372_at         | -5.85          | 1.89E-06 | 4.89E-05 | 11.74             | 1.11            | AW112010      |
| 1451297_at         | -5.84          | 1.91E-06 | 4.94E-05 | 11.6              | 0.91            | Gulo          |
| 1421550_a_at       | -5.84          | 1.95E-06 | 5.02E-05 | 3.98              | 1.38            | Trim34        |
| 1417707_at         | -5.83          | 1.97E-06 | 5.07E-05 | 9.24              | 1.29            | N4bp2l1       |
| 1422070_at         | -5.83          | 1.99E-06 | 5.11E-05 | 10.69             | 0.84            | Adh4          |
| 1419700_a_at       | -5.83          | 2.00E-06 | 5.12E-05 | 5.25              | 2.78            | Prom1         |
| 1424226_at         | -5.82          | 2.03E-06 | 5.19E-05 | 7.25              | 1.35            | 9030617003Rik |
| 1418680_at         | -5.81          | 2.09E-06 | 5.31E-05 | 12.37             | 0.9             | Serpind1      |
| 1438033_at         | -5.81          | 2.10E-06 | 5.33E-05 | 5.78              | 1.47            | Tef           |
| 1428793_at         | -5.81          | 2.11E-06 | 5.35E-05 | 4.39              | 1.35            | Slc36a1       |
| 1454803_a_at       | -5.8           | 2.14E-06 | 5.41E-05 | 3.75              | 1.11            | Hdac11        |
| 1449565_at         | -5.8           | 2.18E-06 | 5.50E-05 | 6.92              | 2.3             | Cyp2g1        |
| 1456890_at         | -5.79          | 2.23E-06 | 5.60E-05 | 5.4               | 1.56            | Ddx58         |
| 1431701_a_at       | -5.79          | 2.24E-06 | 5.61E-05 | 9.21              | 1.09            | Pdzk1         |
| 1437453_s_at       | -5.78          | 2.29E-06 | 5.70E-05 | 6.38              | 1.92            | Pcsk9         |
| 1419146_a_at       | -5.78          | 2.29E-06 | 5.70E-05 | 3.83              | 2.35            | Gck           |
| 1460173_at         | -5.78          | 2.29E-06 | 5.70E-05 | 9.29              | 1.14            | Lasp1         |
| 1443964_at         | -5.77          | 2.35E-06 | 5.83E-05 | 4.35              | 1.23            | Tmie          |
| 1451895_a_at       | -5.77          | 2.39E-06 | 5.92E-05 | 10.63             | 1.01            | Dhcr24        |
| 1425860_x_at       | -5.76          | 2.45E-06 | 6.04E-05 | 3.43              | 1.08            | Cklf          |
| 1419173_at         | -5.75          | 2.53E-06 | 6.18E-05 | 6.98              | 1.45            | Acy1          |
| 1460044_at         | -5.74          | 2.60E-06 | 6.34E-05 | 9.22              | 1.21            | Onecut2       |
| 1437234_x_at       | -5.73          | 2.62E-06 | 6.37E-05 | 3.72              | 1.12            | Prmt2         |
| 1449492_a_at       | -5.72          | 2.70E-06 | 6.54E-05 | 10.94             | 1.16            | Lect2         |
| 1428979_at         | -5.72          | 2.73E-06 | 6.59E-05 | 3.38              | 0.97            | Mtf1          |
| 1424319_at         | -5.72          | 2.75E-06 | 6.61E-05 | 4.74              | 1.47            | Oraov1        |
| 1436643_x_at       | -5.72          | 2.76E-06 | 6.61E-05 | 12.29             | 1.72            | Hamp2         |
| 1420339_at         | -5.72          | 2.76E-06 | 6.61E-05 | 5.23              | 1.37            | Memo1         |
| 1417419_at         | -5.7           | 2.87E-06 | 6.85E-05 | 8.2               | 1.16            | Ccnd1         |
| 1438115_a_at       | -5.69          | 2.94E-06 | 6.98E-05 | 11.69             | 0.77            | Slc9a3r1      |
| 1456409_at         | -5.69          | 2.95E-06 | 6.98E-05 | 2.94              | 1.06            | Klhdc7a       |
| 1453304_s_at       | -5.66          | 3.23E-06 | 7.56E-05 | 12.36             | 1.13            | Ly6e          |
| 1428393_at         | -5.66          | 3.25E-06 | 7.59E-05 | 11.59             | 0.91            | Nrn1          |
| 1420827_a_at       | -5.64          | 3.44E-06 | 7.95E-05 | 9.35              | 0.92            | Ccng1         |

| Probe <sup>1</sup> | t <sup>2</sup> | p-value  | q-value  | Mean <sup>3</sup> | FC <sup>4</sup> | Symbol             |
|--------------------|----------------|----------|----------|-------------------|-----------------|--------------------|
| 1423571_at         | -5.63          | 3.56E-06 | 8.20E-05 | 7.94              | 1.3             | Edg1               |
| 1418835_at         | -5.62          | 3.59E-06 | 8.26E-05 | 8.6               | 1.46            | Phlda1             |
| 1418737_at         | -5.62          | 3.68E-06 | 8.42E-05 | 8.26              | 1.37            | Nudt2              |
| 1417783_at         | -5.61          | 3.71E-06 | 8.47E-05 | 8.15              | 1.02            | Als2               |
| 1427473_at         | -5.61          | 3.72E-06 | 8.47E-05 | 4.16              | 1.97            | Gstm3              |
| 1430688_s_at       | -5.61          | 3.75E-06 | 8.49E-05 | 6.78              | 1.75            | D730039F16Rik      |
| 1448163_at         | -5.6           | 3.82E-06 | 8.62E-05 | 6.31              | 1.52            | Gnpda1             |
| 1439475_at         | -5.6           | 3.84E-06 | 8.66E-05 | 3.78              | 1.17            | Zfp429             |
| 1434962_x_at       | -5.6           | 3.86E-06 | 8.67E-05 | 6.77              | 1.12            | Ccl27              |
| 1439251_at         | -5.6           | 3.87E-06 | 8.67E-05 | 4.34              | 1.19            | LOC100042616       |
| 1455400_at         | -5.59          | 4.00E-06 | 8.87E-05 | 9.9               | 0.97            | Ddah1              |
| 1423489_at         | -5.58          | 4.05E-06 | 8.95E-05 | 12.87             | 0.73            | Mmd                |
| 1435417_at         | -5.58          | 4.06E-06 | 8.95E-05 | 7.25              | 1.26            | AI464131           |
| 1452021_a_at       | -5.56          | 4.25E-06 | 9.31E-05 | 5.98              | 1.62            | Hes6               |
| 1444980_at         | -5.55          | 4.38E-06 | 9.47E-05 | 8.33              | 1.15            | Onecut2            |
| 1440226_at         | -5.55          | 4.38E-06 | 9.47E-05 | 4.98              | 1.64            | Zfp760             |
| 1452009_at         | -5.55          | 4.39E-06 | 9.47E-05 | 7.63              | 1.37            | 1810054D07Rik      |
| 1441548_at         | -5.54          | 4.56E-06 | 9.77E-05 | 3.05              | 0.84            | Frm4b              |
| 1417298_at         | -5.53          | 4.66E-06 | 9.94E-05 | 11.11             | 0.85            | Ebpl               |
| 1417172_at         | -5.53          | 4.72E-06 | 0.0001   | 4.64              | 1.33            | Ube2l6             |
| 1419042_at         | -5.52          | 4.85E-06 | 0.0001   | 12.41             | 0.9             | Iigp1              |
| 1422183_a_at       | -5.52          | 4.88E-06 | 0.0001   | 3.94              | 1.52            | Adra1b             |
| 1456377_x_at       | -5.51          | 4.97E-06 | 0.0001   | 9.32              | 1.32            | LOC632329          |
| 1454995_at         | -5.49          | 5.27E-06 | 0.00011  | 9.72              | 0.89            | Ddah1              |
| 1428828_at         | -5.49          | 5.30E-06 | 0.00011  | 6.32              | 1.23            | Rpain              |
| 1430375_a_at       | -5.49          | 5.31E-06 | 0.00011  | 5.84              | 1.38            | Ccl27              |
| 1424530_at         | -5.48          | 5.35E-06 | 0.00011  | 11.41             | 0.8             | Sec14l2            |
| 1431721_a_at       | -5.48          | 5.36E-06 | 0.00011  | 9.37              | 1.17            | Proz               |
| 1449365_at         | -5.46          | 5.75E-06 | 0.00012  | 5.71              | 1.63            | Edg8               |
| 1419074_at         | -5.45          | 5.96E-06 | 0.00012  | 10.17             | 1.12            | Chac2              |
| 1435628_x_at       | -5.44          | 6.00E-06 | 0.00012  | 5.72              | 1.89            | BC005512           |
| 1426092_a_at       | -5.44          | 6.06E-06 | 0.00012  | 3.42              | 0.91            | Trim34             |
| 1448277_at         | -5.44          | 6.10E-06 | 0.00012  | 5.57              | 1.48            | Pold2              |
| 1420927_at         | -5.44          | 6.13E-06 | 0.00012  | 4.93              | 1.48            | St6gal1            |
| 1436530_at         | -5.44          | 6.17E-06 | 0.00012  | 9.4               | 1.51            | OTTMUSG00000000971 |
| 1443866_at         | -5.43          | 6.26E-06 | 0.00013  | 5.01              | 1.63            | Lrtm1              |
| 1420641_a_at       | -5.42          | 6.39E-06 | 0.00013  | 10.72             | 0.94            | Sqrdl              |
| 1439858_at         | -5.42          | 6.46E-06 | 0.00013  | 3.67              | 1.04            | NA                 |
| 1427369_at         | -5.42          | 6.51E-06 | 0.00013  | 8.58              | 1.26            | Nlrp6              |
| 1455698_at         | -5.41          | 6.69E-06 | 0.00013  | 7.34              | 1.12            | Tloc1              |
| 1426440_at         | -5.4           | 6.85E-06 | 0.00013  | 9.45              | 0.84            | Dhrs7              |
| 1456264_at         | -5.39          | 6.93E-06 | 0.00014  | 4.22              | 1.35            | Commd7             |
| 1438037_at         | -5.39          | 7.00E-06 | 0.00014  | 6.93              | 1.63            | Herc5              |
| 1451260_at         | -5.39          | 7.00E-06 | 0.00014  | 8.47              | 1.26            | Aldh1b1            |
| 1450783_at         | -5.38          | 7.14E-06 | 0.00014  | 6.41              | 2.47            | Ifit1              |
| 1421382_at         | -5.38          | 7.15E-06 | 0.00014  | 10.55             | 1.47            | Prlr               |
| 1442338_at         | -5.38          | 7.21E-06 | 0.00014  | 6.63              | 1.54            | NA                 |
| 1436103_at         | -5.38          | 7.24E-06 | 0.00014  | 3.88              | 1.04            | Rab3ip             |
| 1434798_at         | -5.38          | 7.28E-06 | 0.00014  | 7.05              | 2.02            | Atp6v0d2           |
| 1428700_at         | -5.38          | 7.29E-06 | 0.00014  | 3.42              | 1.31            | P2ry13             |
| 1450715_at         | -5.38          | 7.32E-06 | 0.00014  | 11.31             | 1.15            | Cyp1a2             |
| 1429146_at         | -5.37          | 7.51E-06 | 0.00014  | 8.1               | 1.25            | 6620401M08Rik      |
| 1422685_at         | -5.37          | 7.51E-06 | 0.00014  | 8                 | 1.19            | Exoc4              |

| Probe <sup>1</sup> | t <sup>2</sup> | p-value  | q-value | Mean <sup>3</sup> | FC <sup>4</sup> | Symbol        |
|--------------------|----------------|----------|---------|-------------------|-----------------|---------------|
| 1424534_at         | -5.36          | 7.56E-06 | 0.00014 | 5.4               | 1.69            | Mmd2          |
| 1451731_at         | -5.36          | 7.69E-06 | 0.00014 | 9.41              | 1               | Abca3         |
| 1417532_at         | -5.36          | 7.71E-06 | 0.00015 | 9.74              | 0.8             | Cyp2j5        |
| 1432492_a_at       | -5.34          | 8.10E-06 | 0.00015 | 10.89             | 0.87            | Haoa          |
| 1422833_at         | -5.34          | 8.11E-06 | 0.00015 | 7.17              | 1.45            | Foxa2         |
| 1427480_at         | -5.34          | 8.16E-06 | 0.00015 | 11.61             | 0.71            | Leap2         |
| 1424033_at         | -5.32          | 8.53E-06 | 0.00016 | 8.31              | 1.37            | Sfrs7         |
| 1417626_at         | -5.32          | 8.61E-06 | 0.00016 | 6.53              | 1.17            | Pde4dip       |
| 1434036_at         | -5.31          | 8.74E-06 | 0.00016 | 10.63             | 0.83            | Mtss1         |
| 1452583_s_at       | -5.31          | 8.84E-06 | 0.00016 | 10.63             | 0.71            | Galm          |
| 1426959_at         | -5.3           | 8.96E-06 | 0.00016 | 9.28              | 0.92            | Bdh1          |
| 1425156_at         | -5.3           | 9.01E-06 | 0.00017 | 5.61              | 1.94            | Gbp6          |
| 1435101_at         | -5.3           | 9.04E-06 | 0.00017 | 7.82              | 1.18            | Derb2         |
| 1434380_at         | -5.29          | 9.25E-06 | 0.00017 | 8.58              | 1.51            | Gbp6          |
| 1431089_at         | -5.29          | 9.44E-06 | 0.00017 | 3.77              | 1.07            | Cpsf2         |
| 1418129_at         | -5.27          | 9.79E-06 | 0.00018 | 8.91              | 1.04            | Dhcr24        |
| 1426690_a_at       | -5.27          | 9.85E-06 | 0.00018 | 8.22              | 1.59            | Srebf1        |
| 1449164_at         | -5.27          | 1.00E-05 | 0.00018 | 5.56              | 2.13            | Cd68          |
| 1453196_a_at       | -5.27          | 1.00E-05 | 0.00018 | 4.56              | 1.94            | Oasl2         |
| 1455405_at         | -5.26          | 1.01E-05 | 0.00018 | 6.22              | 1.57            | Pstpip2       |
| 1429947_a_at       | -5.26          | 1.01E-05 | 0.00018 | 5.12              | 1.5             | Zbp1          |
| 1424171_a_at       | -5.26          | 1.02E-05 | 0.00018 | 11.77             | 0.75            | Hagh          |
| 1454745_at         | -5.26          | 1.03E-05 | 0.00018 | 10.07             | 0.86            | Arhgap29      |
| 1452625_at         | -5.26          | 1.03E-05 | 0.00018 | 6.95              | 1.21            | Kctd2         |
| 1423437_at         | -5.25          | 1.04E-05 | 0.00018 | 10.6              | 0.89            | Gsta3         |
| 1450034_at         | -5.25          | 1.05E-05 | 0.00018 | 7.99              | 1.74            | Stat1         |
| 1448594_at         | -5.25          | 1.05E-05 | 0.00018 | 3.35              | 0.89            | Wisp1         |
| 1450646_at         | -5.25          | 1.06E-05 | 0.00019 | 9.66              | 1.4             | Cyp51         |
| 1442612_at         | -5.24          | 1.07E-05 | 0.00019 | 5.58              | 1.88            | C730036E19Rik |
| 1428603_at         | -5.24          | 1.07E-05 | 0.00019 | 9.45              | 0.87            | LOC100036521  |
| 1460232_s_at       | -5.24          | 1.09E-05 | 0.00019 | 6.68              | 1.83            | Hsd3b6        |
| 1435357_at         | -5.24          | 1.09E-05 | 0.00019 | 8.82              | 1.12            | D4Wsu53e      |
| 1430584_s_at       | -5.24          | 1.09E-05 | 0.00019 | 6.26              | 3.97            | Car3          |
| 1422433_s_at       | -5.23          | 1.10E-05 | 0.00019 | 12.43             | 0.71            | Idh1          |
| 1432330_at         | -5.23          | 1.12E-05 | 0.00019 | 5.01              | 1.41            | Cfhr3         |
| 1437704_at         | -5.23          | 1.12E-05 | 0.00019 | 3.65              | 1.15            | 2900024O10Rik |
| 1425837_a_at       | -5.22          | 1.14E-05 | 0.00019 | 10.66             | 1.85            | Ccrn4l        |
| 1431591_s_at       | -5.21          | 1.16E-05 | 0.0002  | 5.88              | 1.76            | LOC677168     |
| 1422479_at         | -5.21          | 1.18E-05 | 0.0002  | 9.58              | 1.06            | Acss2         |
| 1418492_at         | -5.21          | 1.18E-05 | 0.0002  | 5.07              | 1.52            | Grem2         |
| 1455324_at         | -5.2           | 1.21E-05 | 0.0002  | 9.93              | 1.37            | Plcx2         |
| 1445062_at         | -5.2           | 1.21E-05 | 0.0002  | 3.71              | 1.21            | Elovl6        |
| 1418329_at         | -5.2           | 1.22E-05 | 0.0002  | 6.35              | 1.25            | Pgpep1        |
| 1418668_at         | -5.19          | 1.26E-05 | 0.00021 | 10.96             | 0.97            | Acsm1         |
| 1426221_at         | -5.18          | 1.27E-05 | 0.00021 | 8.85              | 0.95            | Loh11cr2a     |
| 1449267_at         | -5.18          | 1.29E-05 | 0.00022 | 5.38              | 1.19            | Chid1         |
| 1435538_at         | -5.18          | 1.29E-05 | 0.00022 | 7.93              | 0.99            | 0610030E20Rik |
| 1423680_at         | -5.17          | 1.30E-05 | 0.00022 | 12                | 0.96            | Fads1         |
| 1437624_x_at       | -5.17          | 1.34E-05 | 0.00022 | 8.4               | 1               | Nudt16l1      |
| 1442051_at         | -5.16          | 1.35E-05 | 0.00022 | 5.95              | 1.79            | Hist2h3c1     |
| 1417809_at         | -5.16          | 1.36E-05 | 0.00022 | 8.79              | 0.84            | Slc22a18      |
| 1434139_at         | -5.16          | 1.38E-05 | 0.00023 | 6.58              | 1.71            | Parp11        |
| 1454671_at         | -5.15          | 1.42E-05 | 0.00023 | 10.19             | 1.21            | Insig1        |

| Probe <sup>1</sup> | t <sup>2</sup> | p-value  | q-value | Mean <sup>3</sup> | FC <sup>4</sup> | Symbol        |
|--------------------|----------------|----------|---------|-------------------|-----------------|---------------|
| 1422604_at         | -5.14          | 1.42E-05 | 0.00023 | 13.75             | 0.58            | Uox           |
| 1424835_at         | -5.14          | 1.44E-05 | 0.00023 | 8.61              | 0.95            | Gstm4         |
| 1426726_at         | -5.14          | 1.45E-05 | 0.00023 | 4.82              | 1.74            | Ppp1r10       |
| 1434331_at         | -5.14          | 1.45E-05 | 0.00023 | 6.46              | 1.15            | Eif2c1        |
| 1418445_at         | -5.14          | 1.45E-05 | 0.00024 | 8.8               | 1.13            | Slc16a2       |
| 1419476_at         | -5.13          | 1.46E-05 | 0.00024 | 6.35              | 1.63            | Adamdec1      |
| 1421221_at         | -5.13          | 1.48E-05 | 0.00024 | 6.68              | 1.18            | Bcdo2         |
| 1455336_at         | -5.13          | 1.49E-05 | 0.00024 | 4.96              | 1.47            | Thap2         |
| 1448227_at         | -5.12          | 1.51E-05 | 0.00024 | 7.67              | 1.17            | Grb7          |
| 1453739_at         | -5.12          | 1.53E-05 | 0.00024 | 6.2               | 1.43            | Tmem126b      |
| 1424016_at         | -5.11          | 1.57E-05 | 0.00025 | 6.68              | 1.2             | 2310007F21Rik |
| 1420403_at         | -5.11          | 1.58E-05 | 0.00025 | 3.08              | 0.98            | Atp2b2        |
| 1443821_at         | -5.11          | 1.59E-05 | 0.00025 | 4.07              | 1.29            | Lect2         |
| 1416318_at         | -5.11          | 1.59E-05 | 0.00025 | 7.38              | 1.94            | Serpinb1a     |
| 1423547_at         | -5.1           | 1.59E-05 | 0.00025 | 10.65             | 1.75            | Lyz2          |
| 1444143_at         | -5.1           | 1.61E-05 | 0.00025 | 3.4               | 1.25            | N4bp2l1       |
| 1430893_at         | -5.1           | 1.62E-05 | 0.00025 | 8.43              | 2.83            | 2610016E04Rik |
| 1434283_at         | -5.09          | 1.67E-05 | 0.00026 | 8.6               | 1.18            | Arid5b        |
| 1440866_at         | -5.08          | 1.69E-05 | 0.00026 | 4.83              | 1.23            | Eif2ak2       |
| 1437261_at         | -5.08          | 1.70E-05 | 0.00026 | 4.91              | 1.38            | 2900024O10Rik |
| 1439035_at         | -5.08          | 1.70E-05 | 0.00026 | 5.09              | 1.28            | Zfp322a       |
| 1419552_at         | -5.08          | 1.70E-05 | 0.00026 | 9.75              | 0.85            | Echdc1        |
| 1436996_x_at       | -5.08          | 1.72E-05 | 0.00027 | 12.24             | 1.49            | Lyz1          |
| 1448538_a_at       | -5.08          | 1.73E-05 | 0.00027 | 8.89              | 2               | D4Wsu53e      |
| 1424172_at         | -5.07          | 1.75E-05 | 0.00027 | 11.47             | 0.78            | Hagh          |
| 1452318_a_at       | -5.07          | 1.75E-05 | 0.00027 | 9.1               | 1.25            | Hspa1b        |
| 1418760_at         | -5.07          | 1.78E-05 | 0.00027 | 8.78              | 1.27            | Rdh11         |
| 1453380_a_at       | -5.06          | 1.79E-05 | 0.00028 | 3.67              | 1.05            | Xrcc6bp1      |
| 1440993_at         | -5.06          | 1.80E-05 | 0.00028 | 10.22             | 1.06            | AW111846      |
| 1425178_s_at       | -5.06          | 1.81E-05 | 0.00028 | 10.75             | 0.84            | Shmt1         |
| 1455334_at         | -5.05          | 1.88E-05 | 0.00028 | 4.67              | 1.6             | D330038O06Rik |
| 1418579_at         | -5.05          | 1.89E-05 | 0.00029 | 7.26              | 1.07            | Cetn2         |
| 1450982_at         | -5.04          | 1.91E-05 | 0.00029 | 8.64              | 0.88            | Slc9a3r1      |
| 1436033_at         | -5.04          | 1.94E-05 | 0.00029 | 9.52              | 0.76            | BC031353      |
| 1459740_s_at       | -5.04          | 1.94E-05 | 0.00029 | 7.31              | 1.59            | Ucp2          |
| 1427229_at         | -5.04          | 1.94E-05 | 0.00029 | 7.62              | 1.42            | Hmgcr         |
| 1439153_at         | -5.04          | 1.94E-05 | 0.00029 | 9.32              | 1.06            | Rnf144b       |
| 1437649_x_at       | -5.03          | 1.99E-05 | 0.0003  | 11.77             | 0.77            | Snx22         |
| 1426715_s_at       | -5.03          | 1.99E-05 | 0.0003  | 7.46              | 0.99            | Slc46a1       |
| 1434485_a_at       | -5.03          | 2.00E-05 | 0.0003  | 12.55             | 0.71            | Ugp2          |
| 1424266_s_at       | -5.02          | 2.04E-05 | 0.0003  | 12.06             | 0.73            | AU018778      |
| 1438759_x_at       | -5.02          | 2.06E-05 | 0.0003  | 10.7              | 0.65            | NA            |
| 1422155_at         | -5             | 2.14E-05 | 0.00031 | 5.02              | 1.67            | Hist2h3c2     |
| 1455059_at         | -5             | 2.15E-05 | 0.00032 | 3.81              | 1.25            | NA            |
| 1423488_at         | -4.97          | 2.32E-05 | 0.00034 | 12.01             | 0.68            | Mmd           |
| 1422678_at         | -4.97          | 2.36E-05 | 0.00034 | 10.34             | 0.88            | Dgat2         |
| 1420357_s_at       | -4.96          | 2.38E-05 | 0.00034 | 5.58              | 2.15            | Xlr3a         |
| 1436183_at         | -4.96          | 2.42E-05 | 0.00035 | 8.64              | 1.01            | 9830115L13Rik |
| 1417961_a_at       | -4.95          | 2.48E-05 | 0.00035 | 6.95              | 1.47            | Trim30        |
| 1439426_x_at       | -4.95          | 2.48E-05 | 0.00035 | 11.6              | 1.59            | Lyz2          |
| 1424518_at         | -4.95          | 2.48E-05 | 0.00035 | 9.06              | 1.9             | Apol9a        |
| 1448438_at         | -4.94          | 2.56E-05 | 0.00036 | 11.54             | 0.73            | Derl2         |
| 1451501_a_at       | -4.94          | 2.58E-05 | 0.00036 | 12.63             | 1.08            | Ghr           |

| Probe <sup>1</sup> | t <sup>2</sup> | p-value  | q-value | Mean <sup>3</sup> | FC <sup>4</sup> | Symbol        |
|--------------------|----------------|----------|---------|-------------------|-----------------|---------------|
| 1445897_s_at       | -4.93          | 2.59E-05 | 0.00036 | 10.79             | 0.61            | Ifi35         |
| 1418204_s_at       | -4.93          | 2.60E-05 | 0.00037 | 7.01              | 1.74            | Aif1          |
| 1438183_x_at       | -4.93          | 2.62E-05 | 0.00037 | 11.28             | 0.8             | Sord          |
| 1423782_at         | -4.93          | 2.64E-05 | 0.00037 | 9.09              | 0.84            | Mobkl1b       |
| 1436550_at         | -4.92          | 2.70E-05 | 0.00038 | 4.94              | 1.29            | Fbxo30        |
| 1436244_a_at       | -4.92          | 2.74E-05 | 0.00038 | 3.53              | 0.88            | Tle2          |
| 1417306_at         | -4.91          | 2.77E-05 | 0.00038 | 5.06              | 1.16            | Tyk2          |
| 1455045_at         | -4.91          | 2.77E-05 | 0.00039 | 8.83              | 0.83            | Srr           |
| 1418765_at         | -4.91          | 2.78E-05 | 0.00039 | 10.49             | 0.7             | Timd2         |
| 1433710_at         | -4.91          | 2.79E-05 | 0.00039 | 5.33              | 1.39            | Edc3          |
| 1423186_at         | -4.91          | 2.80E-05 | 0.00039 | 4.85              | 1.52            | Tiam2         |
| 1428748_at         | -4.9           | 2.82E-05 | 0.00039 | 6.76              | 1.38            | 5830428H23Rik |
| 1440576_at         | -4.9           | 2.82E-05 | 0.00039 | 6.7               | 1.35            | Cpn1          |
| 1451844_at         | -4.9           | 2.84E-05 | 0.00039 | 5.51              | 2.15            | Prlr          |
| 1427883_a_at       | -4.9           | 2.84E-05 | 0.00039 | 7.59              | 1.5             | Col3a1        |
| 1429024_at         | -4.9           | 2.85E-05 | 0.00039 | 3.41              | 0.85            | Rbm20         |
| 1449025_at         | -4.9           | 2.88E-05 | 0.00039 | 6.28              | 1.62            | Ifit3         |
| 1451091_at         | -4.89          | 2.91E-05 | 0.0004  | 9.45              | 0.76            | Txndc5        |
| 1423104_at         | -4.89          | 2.93E-05 | 0.0004  | 9.33              | 1.12            | Irs1          |
| 1429104_at         | -4.89          | 2.93E-05 | 0.0004  | 4.8               | 1.51            | Limd2         |
| 1435893_at         | -4.89          | 2.96E-05 | 0.0004  | 5.18              | 1.69            | Vldlr         |
| 1417373_a_at       | -4.89          | 2.97E-05 | 0.0004  | 12.48             | 0.6             | Tuba4a        |
| 1419559_at         | -4.89          | 2.97E-05 | 0.0004  | 9.85              | 1.1             | Cyp4f14       |
| 1418884_x_at       | -4.89          | 2.98E-05 | 0.0004  | 7.35              | 1.12            | Tuba1a        |
| 1451526_at         | -4.88          | 3.02E-05 | 0.0004  | 3.85              | 1.12            | Arhgap12      |
| 1426876_at         | -4.87          | 3.11E-05 | 0.00042 | 9.27              | 0.85            | Pm20d1        |
| 1455209_at         | -4.87          | 3.15E-05 | 0.00042 | 4.75              | 1.38            | Pck1          |
| 1450226_at         | -4.86          | 3.22E-05 | 0.00043 | 10.18             | 1.38            | Prlr          |
| 1451742_a_at       | -4.86          | 3.23E-05 | 0.00043 | 12.08             | 0.73            | Ugp2          |
| 1455470_x_at       | -4.85          | 3.31E-05 | 0.00044 | 10.42             | 0.91            | Lasp1         |
| 1418072_at         | -4.84          | 3.44E-05 | 0.00045 | 13.46             | 0.59            | Hist1h2bc     |
| 1440005_at         | -4.83          | 3.48E-05 | 0.00046 | 7.73              | 1.13            | Onecut2       |
| 1440890_a_at       | -4.83          | 3.49E-05 | 0.00046 | 6.74              | 1.58            | Zfp809        |
| 1436045_at         | -4.83          | 3.51E-05 | 0.00046 | 3.73              | 1.03            | Tsga10        |
| 1448029_at         | -4.83          | 3.52E-05 | 0.00046 | 7.98              | 1.2             | Tbx3          |
| 1417826_at         | -4.83          | 3.53E-05 | 0.00046 | 8.33              | 1.02            | Akr1e1        |
| 1423693_at         | -4.82          | 3.56E-05 | 0.00046 | 7.23              | 1.04            | Ela1          |
| 1447791_s_at       | -4.82          | 3.58E-05 | 0.00046 | 2.94              | 0.96            | Gna14         |
| 1448316_at         | -4.82          | 3.58E-05 | 0.00046 | 5.05              | 1.31            | Cmtm3         |
| 1448905_at         | -4.82          | 3.59E-05 | 0.00046 | 7.16              | 1.13            | Nme3          |
| 1449034_at         | -4.82          | 3.63E-05 | 0.00047 | 12.03             | 0.92            | Klkb1         |
| 1454641_at         | -4.82          | 3.64E-05 | 0.00047 | 10.22             | 0.72            | Cggbp1        |
| 1448188_at         | -4.81          | 3.66E-05 | 0.00047 | 6.42              | 1.7             | Ucp2          |
| 1440873_at         | -4.81          | 3.73E-05 | 0.00048 | 3.51              | 0.88            | NA            |
| 1451218_at         | -4.81          | 3.75E-05 | 0.00048 | 9.87              | 0.79            | Edem1         |
| 1420619_a_at       | -4.8           | 3.76E-05 | 0.00048 | 10.02             | 0.72            | Aes           |
| 1416130_at         | -4.8           | 3.79E-05 | 0.00048 | 7.48              | 0.99            | Prnp          |
| 1421109_at         | -4.8           | 3.83E-05 | 0.00049 | 10.16             | 0.77            | Cml2          |
| 1417963_at         | -4.8           | 3.84E-05 | 0.00049 | 8.16              | 0.97            | Pltp          |
| 1417490_at         | -4.8           | 3.85E-05 | 0.00049 | 12.44             | 0.66            | Ctsb          |
| 1451650_at         | -4.79          | 3.88E-05 | 0.00049 | 4.95              | 1.14            | Ddo           |
| 1448253_at         | -4.79          | 3.88E-05 | 0.00049 | 13.15             | 0.6             | Glud1         |
| 1421087_at         | -4.79          | 3.88E-05 | 0.00049 | 3.3               | 0.85            | Per3          |

| Probe <sup>1</sup> | t <sup>2</sup> | p-value  | q-value | Mean <sup>3</sup> | FC <sup>4</sup> | Symbol        |
|--------------------|----------------|----------|---------|-------------------|-----------------|---------------|
| 1436594_at         | -4.79          | 3.90E-05 | 0.00049 | 4.64              | 1.48            | Zfp719        |
| 1435353_a_at       | -4.79          | 3.90E-05 | 0.00049 | 7.14              | 1.22            | Sfi1          |
| 1455285_at         | -4.79          | 3.91E-05 | 0.00049 | 9.07              | 0.78            | Slc31a1       |
| 1436189_at         | -4.79          | 3.91E-05 | 0.00049 | 6.95              | 1.37            | Nqo2          |
| 1454902_at         | -4.79          | 3.92E-05 | 0.00049 | 3.41              | 0.82            | Prkcz         |
| 1417141_at         | -4.79          | 3.97E-05 | 0.0005  | 9.85              | 1.63            | Igtp          |
| 1418710_at         | -4.78          | 4.01E-05 | 0.0005  | 9.94              | 0.73            | Cd59a         |
| 1423166_at         | -4.78          | 4.03E-05 | 0.0005  | 10.75             | 0.79            | Cd36          |
| 1418888_a_at       | -4.78          | 4.05E-05 | 0.0005  | 12.1              | 0.66            | Sepx1         |
| 1448852_at         | -4.78          | 4.06E-05 | 0.0005  | 13.86             | 0.54            | Rgn           |
| 1423045_at         | -4.78          | 4.06E-05 | 0.0005  | 6.63              | 1.16            | Ncbp2         |
| 1457142_at         | -4.78          | 4.09E-05 | 0.0005  | 5.88              | 1.74            | Necab1        |
| 1450181_at         | -4.78          | 4.09E-05 | 0.0005  | 5.07              | 1.45            | Cux2          |
| 1428903_at         | -4.77          | 4.14E-05 | 0.00051 | 2.71              | 0.79            | 3110037I16Rik |
| 1421259_at         | -4.77          | 4.18E-05 | 0.00051 | 4.27              | 1.27            | Pklr          |
| 1436566_at         | -4.77          | 4.19E-05 | 0.00051 | 3.03              | 1.13            | Rab40b        |
| 1438634_x_at       | -4.77          | 4.19E-05 | 0.00051 | 11.98             | 0.88            | Lasp1         |
| 1422948_s_at       | -4.76          | 4.21E-05 | 0.00052 | 4.16              | 1.17            | Hist1h3a      |
| 1417902_at         | -4.76          | 4.23E-05 | 0.00052 | 10.29             | 0.83            | Slc19a2       |
| 1460603_at         | -4.76          | 4.28E-05 | 0.00052 | 7.81              | 1.12            | Samd9l        |
| 1422677_at         | -4.76          | 4.31E-05 | 0.00052 | 9.57              | 0.87            | Dgat2         |
| 1416411_at         | -4.75          | 4.36E-05 | 0.00053 | 10.41             | 0.94            | Gstm2         |
| 1423828_at         | -4.75          | 4.44E-05 | 0.00054 | 9.63              | 1.88            | Fasn          |
| 1455940_x_at       | -4.75          | 4.45E-05 | 0.00054 | 9.01              | 0.9             | Wdr6          |
| 1438377_x_at       | -4.74          | 4.46E-05 | 0.00054 | 9.41              | 1.2             | Slc13a3       |
| 1435805_at         | -4.74          | 4.53E-05 | 0.00055 | 8.82              | 0.92            | Lin7a         |
| 1417030_at         | -4.74          | 4.57E-05 | 0.00055 | 3.73              | 0.88            | Tmem206       |
| 1452841_at         | -4.73          | 4.59E-05 | 0.00055 | 5.19              | 1.16            | Pgm2l1        |
| 1431724_a_at       | -4.73          | 4.62E-05 | 0.00055 | 3.02              | 0.73            | P2ry12        |
| 1451326_at         | -4.73          | 4.71E-05 | 0.00056 | 11.19             | 0.77            | Abhd14b       |
| 1434999_at         | -4.72          | 4.75E-05 | 0.00057 | 5.88              | 1.18            | Suv420h1      |
| 1418838_at         | -4.72          | 4.76E-05 | 0.00057 | 7.34              | 0.99            | Abcd1         |
| 1452155_a_at       | -4.72          | 4.85E-05 | 0.00058 | 9.45              | 0.82            | Ddx17         |
| 1438647_x_at       | -4.71          | 4.90E-05 | 0.00058 | 8.73              | 0.94            | Cetn2         |
| 1438558_x_at       | -4.71          | 4.92E-05 | 0.00058 | 5.79              | 1.22            | Foxq1         |
| 1438758_at         | -4.71          | 4.94E-05 | 0.00059 | 10.47             | 0.64            | NA            |
| 1435462_at         | -4.71          | 4.97E-05 | 0.00059 | 8.27              | 1.72            | Plcx2         |
| 1450919_at         | -4.7           | 5.01E-05 | 0.00059 | 9.11              | 0.77            | Mpp1          |
| 1418118_at         | -4.7           | 5.01E-05 | 0.00059 | 12.17             | 0.8             | Slc22a1       |
| 1441110_at         | -4.7           | 5.02E-05 | 0.00059 | 7.36              | 1.12            | Lrit1         |
| 1415677_at         | -4.7           | 5.10E-05 | 0.0006  | 10.23             | 0.86            | Dhrs1         |
| 1454161_s_at       | -4.7           | 5.10E-05 | 0.0006  | 9.13              | 1.03            | 0610007P14Rik |
| 1450033_a_at       | -4.7           | 5.12E-05 | 0.0006  | 9.09              | 1.42            | Stat1         |
| 1448170_at         | -4.7           | 5.14E-05 | 0.0006  | 5.49              | 1.41            | Siah2         |
| 1424444_a_at       | -4.69          | 5.16E-05 | 0.0006  | 8.91              | 0.91            | 1600014C10Rik |
| 1425025_at         | -4.69          | 5.27E-05 | 0.00061 | 5.54              | 1.39            | Tmem106a      |
| 1423350_at         | -4.68          | 5.39E-05 | 0.00063 | 5.21              | 1.68            | Socs5         |
| 1450884_at         | -4.68          | 5.43E-05 | 0.00063 | 9.34              | 1.03            | Cd36          |
| 1422603_at         | -4.68          | 5.44E-05 | 0.00063 | 13.91             | 0.58            | Rnase4        |
| 1433750_at         | -4.67          | 5.46E-05 | 0.00063 | 10.37             | 0.68            | Slc31a1       |
| 1429830_a_at       | -4.67          | 5.47E-05 | 0.00063 | 9.24              | 0.83            | Cd59a         |
| 1420760_s_at       | -4.67          | 5.49E-05 | 0.00063 | 7.24              | 1.04            | Ndr1          |
| 1437432_a_at       | -4.67          | 5.50E-05 | 0.00063 | 6.27              | 1.36            | Trim12        |



| Probe <sup>1</sup> | t <sup>2</sup> | p-value  | q-value | Mean <sup>3</sup> | FC <sup>4</sup> | Symbol        |
|--------------------|----------------|----------|---------|-------------------|-----------------|---------------|
| 1450027_at         | -4.67          | 5.58E-05 | 0.00064 | 6.81              | 1.5             | Sdc3          |
| 1427168_a_at       | -4.67          | 5.58E-05 | 0.00064 | 8.92              | 0.87            | Col14a1       |
| 1434193_at         | -4.66          | 5.65E-05 | 0.00064 | 5.93              | 1.24            | RP23-153M14.8 |
| 1417001_a_at       | -4.66          | 5.67E-05 | 0.00065 | 11.1              | 1.07            | D4Wsu53e      |
| 1452799_at         | -4.66          | 5.68E-05 | 0.00065 | 10.14             | 0.75            | Fggy          |
| 1435536_at         | -4.66          | 5.71E-05 | 0.00065 | 9.16              | 0.93            | Rsc1a1        |
| 1451681_at         | -4.65          | 5.87E-05 | 0.00066 | 12.28             | 0.72            | BC089597      |
| 1427126_at         | -4.65          | 5.90E-05 | 0.00067 | 5.89              | 1.53            | Hspa1b        |
| 1416560_at         | -4.64          | 5.98E-05 | 0.00068 | 5.5               | 1.58            | Slc13a3       |
| 1434486_x_at       | -4.64          | 6.02E-05 | 0.00068 | 12.61             | 0.66            | Ugp2          |
| 1441733_s_at       | -4.64          | 6.05E-05 | 0.00068 | 5.94              | 1.15            | Nup153        |
| 1425826_a_at       | -4.63          | 6.10E-05 | 0.00068 | 7.48              | 0.98            | Sorbs1        |
| 1422684_a_at       | -4.63          | 6.11E-05 | 0.00068 | 5.78              | 1.18            | Exoc4         |
| 1418133_at         | -4.63          | 6.12E-05 | 0.00068 | 7.1               | 1.18            | Bcl3          |
| 1435661_at         | -4.63          | 6.12E-05 | 0.00068 | 5.05              | 1.15            | Als2cr4       |
| 1434745_at         | -4.63          | 6.18E-05 | 0.00069 | 4.93              | 1.17            | Ccnd2         |
| 1421990_at         | -4.63          | 6.22E-05 | 0.00069 | 3.38              | 0.79            | Syt1          |
| 1423436_at         | -4.62          | 6.29E-05 | 0.0007  | 13.59             | 0.65            | Gsta3         |
| 1451515_s_at       | -4.62          | 6.30E-05 | 0.0007  | 12.41             | 0.61            | Glyat         |
| 1451552_at         | -4.62          | 6.35E-05 | 0.0007  | 4.95              | 1.07            | Lipt1         |
| 1417533_a_at       | -4.62          | 6.37E-05 | 0.0007  | 7.95              | 0.85            | Itgb5         |
| 1419031_at         | -4.62          | 6.39E-05 | 0.0007  | 11.77             | 0.74            | Fads2         |
| 1449455_at         | -4.62          | 6.42E-05 | 0.00071 | 5.91              | 1.6             | Hck           |
| 1456494_a_at       | -4.62          | 6.43E-05 | 0.00071 | 3.94              | 1.22            | AI451617      |
| 1451767_at         | -4.62          | 6.43E-05 | 0.00071 | 4.09              | 1.27            | Ncf1          |
| 1438553_x_at       | -4.61          | 6.46E-05 | 0.00071 | 4.9               | 1.13            | NA            |
| 1420008_s_at       | -4.61          | 6.48E-05 | 0.00071 | 8.45              | 0.9             | Wwc1          |
| 1433888_at         | -4.61          | 6.55E-05 | 0.00072 | 3.8               | 1.05            | Atp2b2        |
| 1456026_at         | -4.61          | 6.59E-05 | 0.00072 | 6.57              | 1.22            | Nhlrc3        |
| 1456309_x_at       | -4.6           | 6.66E-05 | 0.00073 | 7.21              | 1.09            | Lasp1         |
| 1434065_at         | -4.6           | 6.67E-05 | 0.00073 | 6.13              | 1.24            | Cwf19l1       |
| 1437085_at         | -4.6           | 6.67E-05 | 0.00073 | 7.4               | 1.37            | D630039A03Rik |
| 1417399_at         | -4.6           | 6.69E-05 | 0.00073 | 7.91              | 1.01            | Gas6          |
| 1417609_at         | -4.6           | 6.72E-05 | 0.00073 | 8.44              | 0.91            | Ube2a         |
| 1429164_at         | -4.6           | 6.81E-05 | 0.00074 | 3.34              | 0.74            | Prss36        |
| 1428309_s_at       | -4.59          | 6.87E-05 | 0.00074 | 5.42              | 1.08            | Pdrg1         |
| 1424339_at         | -4.59          | 6.87E-05 | 0.00074 | 5.97              | 1.22            | Oasl1         |
| 1443327_at         | -4.59          | 6.89E-05 | 0.00074 | 5.15              | 1.25            | D130043K22Rik |
| 1423978_at         | -4.59          | 6.89E-05 | 0.00074 | 6.89              | 1.36            | Sbk1          |
| 1434243_s_at       | -4.59          | 6.90E-05 | 0.00074 | 6.62              | 1.1             | Tomm70a       |
| 1457904_at         | -4.59          | 6.91E-05 | 0.00074 | 5.76              | 1.15            | Car8          |
| 1425701_a_at       | -4.59          | 6.96E-05 | 0.00075 | 3.67              | 1.41            | Rgs3          |
| 1420420_at         | -4.59          | 6.96E-05 | 0.00075 | 10.56             | 0.91            | Hao1          |
| 1455232_at         | -4.59          | 6.98E-05 | 0.00075 | 12.42             | 0.59            | Cml2          |
| 1428308_at         | -4.59          | 7.01E-05 | 0.00075 | 6.58              | 1.16            | Pdrg1         |
| 1455991_at         | -4.58          | 7.04E-05 | 0.00075 | 11.99             | 0.66            | Ccbl2         |
| 1438218_at         | -4.58          | 7.06E-05 | 0.00076 | 5.02              | 1.11            | Zbtb24        |
| 1417767_at         | -4.58          | 7.09E-05 | 0.00076 | 9.91              | 0.78            | Cyb5b         |
| 1453243_at         | -4.58          | 7.11E-05 | 0.00076 | 3.83              | 0.83            | 0610030E20Rik |
| 1440936_at         | -4.58          | 7.11E-05 | 0.00076 | 4.43              | 1.06            | Serac1        |
| 1423244_at         | -4.58          | 7.15E-05 | 0.00076 | 13.76             | 0.49            | Cyp2c68       |
| 1418766_s_at       | -4.58          | 7.19E-05 | 0.00076 | 7.66              | 1               | Timd2         |
| 1452289_a_at       | -4.57          | 7.24E-05 | 0.00077 | 6.22              | 1.21            | Rnf135        |

| Probe <sup>1</sup> | t <sup>2</sup> | p-value  | q-value | Mean <sup>3</sup> | FC <sup>4</sup> | Symbol        |
|--------------------|----------------|----------|---------|-------------------|-----------------|---------------|
| 1424838_at         | -4.57          | 7.24E-05 | 0.00077 | 3.86              | 1.75            | A330049M08Rik |
| 1424648_at         | -4.57          | 7.25E-05 | 0.00077 | 4.4               | 1.01            | Rabl4         |
| 1425918_at         | -4.57          | 7.29E-05 | 0.00077 | 7.43              | 2.08            | Egln3         |
| 1452203_at         | -4.57          | 7.32E-05 | 0.00077 | 6.73              | 1.48            | Obfc2a        |
| 1419435_at         | -4.57          | 7.37E-05 | 0.00078 | 9.83              | 0.75            | Aox1          |
| 1435369_at         | -4.57          | 7.38E-05 | 0.00078 | 8.18              | 0.92            | Fastkd5       |
| 1435196_at         | -4.57          | 7.44E-05 | 0.00078 | 3.38              | 1.32            | Ntrk2         |
| 1424998_at         | -4.56          | 7.52E-05 | 0.00079 | 4.02              | 1.45            | Emr4          |
| 1451860_a_at       | -4.56          | 7.53E-05 | 0.00079 | 7.37              | 1.41            | Trim30        |
| 1440339_at         | -4.56          | 7.55E-05 | 0.00079 | 7.12              | 1.06            | 4833416E15Rik |
| 1448207_at         | -4.56          | 7.57E-05 | 0.00079 | 3.67              | 0.95            | Lasp1         |
| 1433902_at         | -4.56          | 7.65E-05 | 0.0008  | 3.7               | 0.9             | Kbtbd8        |
| 1438116_x_at       | -4.55          | 7.68E-05 | 0.0008  | 11.19             | 0.73            | Slc9a3r1      |
| 1451219_at         | -4.55          | 7.83E-05 | 0.00081 | 9.8               | 0.68            | Ormdl1        |
| 1417847_at         | -4.55          | 7.84E-05 | 0.00081 | 9.04              | 0.93            | Ulk2          |
| 1420410_at         | -4.54          | 7.89E-05 | 0.00082 | 9.97              | 0.67            | Nr5a2         |
| 1438910_a_at       | -4.54          | 7.91E-05 | 0.00082 | 8.7               | 0.86            | Stom          |
| 1452445_at         | -4.54          | 7.91E-05 | 0.00082 | 8.58              | 1.75            | Slc41a2       |
| 1416209_at         | -4.54          | 7.91E-05 | 0.00082 | 13.5              | 0.54            | Glud1         |
| 1434291_a_at       | -4.54          | 7.96E-05 | 0.00082 | 7.56              | 1.21            | Serf1         |
| 1449577_x_at       | -4.54          | 7.97E-05 | 0.00082 | 4.12              | 1.33            | Tpm2          |
| 1439264_x_at       | -4.54          | 7.98E-05 | 0.00082 | 9.47              | 0.79            | Lasp1         |
| 1429619_a_at       | -4.54          | 7.99E-05 | 0.00082 | 3.8               | 0.85            | 8430406I07Rik |
| 1456521_at         | -4.54          | 8.10E-05 | 0.00083 | 9.05              | 0.74            | NA            |
| 1435194_at         | -4.54          | 8.10E-05 | 0.00083 | 9.42              | 0.77            | Hspa4         |
| 1454617_at         | -4.53          | 8.15E-05 | 0.00083 | 10.19             | 0.78            | Arrdc3        |
| 1425778_at         | -4.53          | 8.17E-05 | 0.00083 | 4.04              | 0.99            | Indol1        |
| 1418405_at         | -4.53          | 8.21E-05 | 0.00084 | 10.76             | 0.75            | Hgfac         |
| 1437492_at         | -4.53          | 8.25E-05 | 0.00084 | 3.37              | 1.02            | Mkx           |
| 1426971_at         | -4.53          | 8.26E-05 | 0.00084 | 4.73              | 1.22            | Ube1l         |
| 1427261_at         | -4.53          | 8.29E-05 | 0.00084 | 7.91              | 0.86            | Wwc1          |
| 1435161_at         | -4.53          | 8.30E-05 | 0.00084 | 8.62              | 0.89            | Sepsecs       |
| 1438194_at         | -4.52          | 8.42E-05 | 0.00085 | 10.02             | 0.9             | 2900019G14Rik |
| 1420567_at         | -4.52          | 8.42E-05 | 0.00085 | 7.81              | 1.44            | Prkd3         |
| 1452769_at         | -4.52          | 8.45E-05 | 0.00085 | 8.81              | 0.81            | Rnf145        |
| 1432164_a_at       | -4.52          | 8.51E-05 | 0.00086 | 11.91             | 0.64            | Gcsh          |
| 1429295_s_at       | -4.51          | 8.60E-05 | 0.00086 | 3.45              | 0.76            | Trip13        |
| 1448080_at         | -4.51          | 8.67E-05 | 0.00087 | 8.36              | 0.92            | LOC100040465  |
| 1433696_at         | -4.51          | 8.67E-05 | 0.00087 | 8.58              | 0.87            | Hn1l          |
| 1437033_a_at       | -4.51          | 8.71E-05 | 0.00087 | 3.57              | 0.89            | Skp2          |
| 1418311_at         | -4.51          | 8.79E-05 | 0.00088 | 5.49              | 1.23            | Fn3k          |
| 1448908_at         | -4.51          | 8.82E-05 | 0.00088 | 10.62             | 0.6             | Ppap2b        |
| 1437950_at         | -4.5           | 8.84E-05 | 0.00088 | 5.88              | 1.61            | BC035537      |
| 1448930_at         | -4.5           | 8.96E-05 | 0.00089 | 4.6               | 1.02            | 3010026O09Rik |
| 1437077_at         | -4.5           | 8.99E-05 | 0.00089 | 5.79              | 1.08            | Dcun1d2       |
| 1442097_at         | -4.5           | 9.01E-05 | 0.0009  | 6.28              | 1.56            | EG665393      |
| 1453220_at         | -4.49          | 9.23E-05 | 0.00091 | 6.85              | 1.55            | 4432416J03Rik |
| 1436839_at         | -4.49          | 9.33E-05 | 0.00092 | 6.36              | 1.32            | 2010109K11Rik |
| 1460591_at         | -4.48          | 9.42E-05 | 0.00093 | 9.77              | 0.81            | Esr1          |
| 1418392_a_at       | -4.48          | 9.50E-05 | 0.00094 | 6.53              | 1.48            | Gbp3          |
| 1434299_x_at       | -4.47          | 9.64E-05 | 0.00095 | 8.3               | 0.95            | Rabl4         |
| 1449183_at         | -4.47          | 9.73E-05 | 0.00096 | 11.42             | 0.7             | Comt          |
| 1422903_at         | -4.47          | 9.75E-05 | 0.00096 | 7.15              | 1.5             | Ly86          |

| Probe <sup>1</sup> | t <sup>2</sup> | p-value  | q-value | Mean <sup>3</sup> | FC <sup>4</sup> | Symbol        |
|--------------------|----------------|----------|---------|-------------------|-----------------|---------------|
| 1426301_at         | -4.47          | 9.79E-05 | 0.00096 | 9.04              | 0.74            | Alcam         |
| 1419239_at         | -4.47          | 9.85E-05 | 0.00096 | 4.86              | 1.25            | Zfp54         |
| 1417011_at         | -4.46          | 9.92E-05 | 0.00097 | 10.46             | 0.68            | Sdc2          |
| 1427327_at         | -4.46          | 9.94E-05 | 0.00097 | 4.21              | 1.54            | Pilra         |
| 1450724_at         | -4.46          | 0.0001   | 0.00098 | 8.9               | 0.87            | Drctnnb1a     |
| 1438633_x_at       | -4.46          | 0.0001   | 0.00098 | 9.53              | 0.75            | Lasp1         |
| 1435160_at         | -4.46          | 0.0001   | 0.00099 | 7.4               | 0.9             | Ahsa2         |
| 1437519_x_at       | -4.46          | 0.0001   | 0.00099 | 10.79             | 0.64            | Hagh          |
| 1420525_a_at       | -4.45          | 0.0001   | 0.00099 | 12.75             | 0.61            | Otc           |
| 1417272_at         | -4.45          | 0.0001   | 0.00099 | 7.21              | 1.02            | 9130005N14Rik |
| 1441498_at         | -4.45          | 0.0001   | 0.00099 | 4.31              | 1.1             | Ptprd         |
| 1443940_at         | -4.45          | 0.0001   | 0.00099 | 4.07              | 1.07            | Lrit2         |
| 1419560_at         | -4.45          | 0.0001   | 0.001   | 11.15             | 0.79            | Lipc          |
| 1418804_at         | -4.45          | 0.0001   | 0.00101 | 10.34             | 0.84            | Sucnr1        |
| 1415923_at         | -4.44          | 0.0001   | 0.00101 | 4.2               | 1.02            | Ndn           |
| 1416468_at         | -4.44          | 0.00011  | 0.00102 | 13.87             | 0.47            | Aldh1a1       |
| 1437466_at         | -4.44          | 0.00011  | 0.00102 | 8.63              | 0.81            | Alcam         |
| 1417219_s_at       | -4.44          | 0.00011  | 0.00103 | 8.41              | 0.93            | Tmsb10        |
| 1451362_at         | -4.43          | 0.00011  | 0.00103 | 7.07              | 1.14            | Rab711        |
| 1443003_at         | -4.43          | 0.00011  | 0.00103 | 4.47              | 1.4             | NA            |
| 1438201_at         | -4.43          | 0.00011  | 0.00103 | 3.59              | 0.9             | Ppm2c         |
| 1418716_at         | -4.43          | 0.00011  | 0.00104 | 3.17              | 0.74            | Mrps25        |
| 1439037_at         | -4.43          | 0.00011  | 0.00104 | 5.1               | 1.13            | Ddx17         |
| 1418324_at         | -4.43          | 0.00011  | 0.00105 | 7.45              | 1.04            | Fem1b         |
| 1417825_at         | -4.42          | 0.00011  | 0.00105 | 12.71             | 0.55            | Esd           |
| 1460399_at         | -4.42          | 0.00011  | 0.00105 | 4.61              | 1.03            | Ccdc117       |
| 1435474_at         | -4.42          | 0.00011  | 0.00107 | 3.76              | 1.06            | Taf5          |
| 1431900_a_at       | -4.42          | 0.00011  | 0.00107 | 8.69              | 1.09            | Foxa3         |
| 1424118_a_at       | -4.41          | 0.00011  | 0.00108 | 6.27              | 1.47            | Spc25         |
| 1427482_a_at       | -4.41          | 0.00012  | 0.00108 | 11                | 0.72            | Car8          |
| 1424723_s_at       | -4.41          | 0.00012  | 0.00109 | 7.3               | 1.39            | Cstf3         |
| 1448236_at         | -4.39          | 0.00012  | 0.00113 | 10.71             | 0.58            | Rdx           |
| 1423046_s_at       | -4.39          | 0.00012  | 0.00113 | 8.3               | 0.76            | Ncbp2         |
| 1440234_at         | -4.39          | 0.00012  | 0.00113 | 3.23              | 0.71            | 1810012P15Rik |
| 1452666_a_at       | -4.39          | 0.00012  | 0.00113 | 2.97              | 0.68            | Tmcc2         |
| 1439940_at         | -4.39          | 0.00012  | 0.00115 | 8.38              | 1.05            | 2900019G14Rik |
| 1436070_at         | -4.38          | 0.00013  | 0.00117 | 9.17              | 0.86            | Glo1          |
| 1428930_at         | -4.38          | 0.00013  | 0.00117 | 6.82              | 1.06            | Tmem29        |
| 1416712_at         | -4.38          | 0.00013  | 0.00118 | 8.34              | 0.88            | Pepd          |
| 1427981_a_at       | -4.37          | 0.00013  | 0.00118 | 11.09             | 1.11            | Csad          |
| 1448732_at         | -4.37          | 0.00013  | 0.0012  | 11.95             | 0.67            | Ctsb          |
| 1456208_at         | -4.37          | 0.00013  | 0.0012  | 3.68              | 0.97            | A530057A03Rik |
| 1417671_at         | -4.36          | 0.00013  | 0.00122 | 6.6               | 1.16            | Scly          |
| 1456003_a_at       | -4.36          | 0.00013  | 0.00123 | 4.48              | 0.99            | Slc1a4        |
| 1449097_at         | -4.36          | 0.00013  | 0.00123 | 8.25              | 0.9             | Txnrd2        |
| 1456609_at         | -4.36          | 0.00013  | 0.00123 | 8.78              | 0.76            | Camk2n1       |
| 1425496_at         | -4.35          | 0.00014  | 0.00123 | 7.46              | 1.05            | Abca3         |
| 1426806_at         | -4.35          | 0.00014  | 0.00124 | 6.23              | 1.35            | Obfc2a        |
| 1455972_x_at       | -4.35          | 0.00014  | 0.00126 | 14.35             | 0.39            | Hadh          |
| 1441342_at         | -4.35          | 0.00014  | 0.00126 | 7.94              | 0.9             | Dpp4          |
| 1454649_at         | -4.34          | 0.00014  | 0.00126 | 5.73              | 1.14            | Srd5a1        |
| 1458302_at         | -4.34          | 0.00014  | 0.00126 | 5.96              | 1.34            | NA            |
| 1438167_x_at       | -4.34          | 0.00014  | 0.00127 | 9.13              | 1               | Flcn          |

| Probe <sup>1</sup> | t <sup>2</sup> | p-value | q-value | Mean <sup>3</sup> | FC <sup>4</sup> | Symbol        |
|--------------------|----------------|---------|---------|-------------------|-----------------|---------------|
| 1419172_at         | -4.34          | 0.00014 | 0.00128 | 9.16              | 0.77            | Dhfr          |
| 1417932_at         | -4.34          | 0.00014 | 0.00128 | 8.1               | 1.16            | Il18          |
| 1449523_at         | -4.33          | 0.00014 | 0.00131 | 8.14              | 0.83            | Bcl7c         |
| 1428596_at         | -4.33          | 0.00014 | 0.00131 | 7.44              | 0.85            | Tbc1d9b       |
| 1417189_at         | -4.33          | 0.00014 | 0.00131 | 10.33             | 0.81            | Psme2         |
| 1418294_at         | -4.32          | 0.00015 | 0.00133 | 9.28              | 0.75            | Epb4.1l4b     |
| 1423197_a_at       | -4.32          | 0.00015 | 0.00133 | 7.62              | 0.86            | Smek2         |
| 1447864_s_at       | -4.32          | 0.00015 | 0.00133 | 3.78              | 0.83            | Pogk          |
| 1438488_at         | -4.32          | 0.00015 | 0.00133 | 3.73              | 0.93            | Esd           |
| 1452394_at         | -4.32          | 0.00015 | 0.00134 | 6.91              | 1.15            | Cars          |
| 1423319_at         | -4.31          | 0.00015 | 0.00135 | 9.46              | 1.81            | Hhex          |
| 1424996_at         | -4.31          | 0.00015 | 0.00137 | 7.71              | 0.98            | Cflar         |
| 1425771_at         | -4.31          | 0.00015 | 0.00137 | 9.44              | 0.77            | Akr1d1        |
| 1440688_at         | -4.3           | 0.00016 | 0.00139 | 2.91              | 0.91            | Arhgap26      |
| 1418333_at         | -4.3           | 0.00016 | 0.00139 | 4.37              | 0.94            | Mtf1          |
| 1426568_at         | -4.29          | 0.00016 | 0.00142 | 4.65              | 1.17            | Slc2a9        |
| 1453155_at         | -4.29          | 0.00016 | 0.00144 | 9.35              | 0.74            | Tmem50a       |
| 1426727_s_at       | -4.28          | 0.00017 | 0.00145 | 4.95              | 1.7             | Ppp1r10       |
| 1448110_at         | -4.28          | 0.00017 | 0.00147 | 8.47              | 0.76            | Sema4a        |
| 1451579_at         | -4.28          | 0.00017 | 0.00148 | 4.72              | 1.2             | BC024139      |
| 1438941_x_at       | -4.28          | 0.00017 | 0.00148 | 9.11              | 0.74            | Ampd2         |
| 1453049_at         | -4.27          | 0.00017 | 0.00148 | 6.09              | 0.88            | 6620401M08Rik |
| 1455058_at         | -4.27          | 0.00017 | 0.00149 | 7.8               | 0.95            | Mtmr9         |
| 1449209_a_at       | -4.27          | 0.00017 | 0.0015  | 8.38              | 1.02            | Rdh11         |
| 1450997_at         | -4.27          | 0.00017 | 0.0015  | 5.91              | 1.65            | Stk17b        |
| 1448232_x_at       | -4.25          | 0.00018 | 0.00154 | 8.93              | 0.7             | Tuba1c        |
| 1438186_at         | -4.25          | 0.00018 | 0.00156 | 6.48              | 1.21            | Pdlim5        |
| 1422185_a_at       | -4.25          | 0.00018 | 0.00156 | 10.45             | 0.93            | Cyb5r3        |
| 1448269_a_at       | -4.25          | 0.00018 | 0.00156 | 9.85              | 0.73            | Klhl13        |
| 1423754_at         | -4.25          | 0.00018 | 0.00156 | 12.75             | 0.72            | Ifitm3        |
| 1435727_s_at       | -4.25          | 0.00018 | 0.00157 | 7.2               | 0.9             | Lima1         |
| 1419604_at         | -4.24          | 0.00018 | 0.00158 | 3.44              | 0.9             | Zbp1          |
| 1439755_at         | -4.24          | 0.00019 | 0.0016  | 4.19              | 0.97            | Sipa1l1       |
| 1449084_s_at       | -4.24          | 0.00019 | 0.0016  | 10.43             | 0.6             | Sh3d19        |
| 1417793_at         | -4.24          | 0.00019 | 0.0016  | 9.73              | 1.43            | Iigp2         |
| 1419185_a_at       | -4.24          | 0.00019 | 0.0016  | 9.65              | 0.8             | Mlxipl        |
| 1439783_at         | -4.23          | 0.00019 | 0.00161 | 7.7               | 0.81            | C330018D20Rik |
| 1428791_at         | -4.23          | 0.00019 | 0.00162 | 8.82              | 0.76            | Ube2h         |
| 1434742_s_at       | -4.23          | 0.00019 | 0.00162 | 3.69              | 0.89            | Aifm3         |
| 1448241_at         | -4.23          | 0.00019 | 0.00162 | 9.8               | 0.83            | Gm2a          |
| 1419097_a_at       | -4.23          | 0.00019 | 0.00163 | 8.9               | 0.75            | Stom          |
| 1450696_at         | -4.23          | 0.00019 | 0.00163 | 6.86              | 1.85            | Psmb9         |
| 1437983_at         | -4.23          | 0.00019 | 0.00164 | 8.92              | 0.82            | Sall1         |
| 1426614_at         | -4.23          | 0.00019 | 0.00164 | 6.69              | 0.99            | Prkcbp1       |
| 1428708_x_at       | -4.22          | 0.0002  | 0.00164 | 10.13             | 0.64            | Ptms          |
| 1449839_at         | -4.22          | 0.0002  | 0.00166 | 7.61              | 0.92            | Casp3         |
| 1431095_a_at       | -4.21          | 0.0002  | 0.0017  | 4.41              | 0.97            | Herc5         |
| 1434354_at         | -4.21          | 0.0002  | 0.0017  | 12.43             | 0.52            | Maob          |
| 1446850_at         | -4.2           | 0.00021 | 0.00173 | 5.71              | 1.19            | Ppap2b        |
| 1421132_at         | -4.2           | 0.00021 | 0.00173 | 3.23              | 0.68            | Pvrl3         |
| 1452762_at         | -4.2           | 0.00021 | 0.00173 | 5.8               | 1.1             | 8430436O14Rik |
| 1416553_at         | -4.2           | 0.00021 | 0.00175 | 6.98              | 0.98            | Stra13        |
| 1447057_at         | -4.2           | 0.00021 | 0.00175 | 3.41              | 0.82            | NA            |

| Probe <sup>1</sup> | t <sup>2</sup> | p-value | q-value | Mean <sup>3</sup> | FC <sup>4</sup> | Symbol        |
|--------------------|----------------|---------|---------|-------------------|-----------------|---------------|
| 1421911_at         | -4.2           | 0.00021 | 0.00175 | 5.42              | 1.15            | Stat2         |
| 1451455_at         | -4.19          | 0.00021 | 0.00176 | 7.38              | 1.09            | Thns12        |
| 1418713_at         | -4.19          | 0.00021 | 0.00177 | 12.18             | 0.56            | Pcbd1         |
| 1424921_at         | -4.19          | 0.00022 | 0.00178 | 9.91              | 0.82            | Brd4          |
| 1419528_at         | -4.19          | 0.00022 | 0.00179 | 14.21             | 0.47            | C730007P19Rik |
| 1453145_at         | -4.19          | 0.00022 | 0.00179 | 4.84              | 1.12            | 4933439C20Rik |
| 1417661_at         | -4.18          | 0.00022 | 0.00179 | 4.53              | 0.97            | Rdm1          |
| 1424175_at         | -4.18          | 0.00022 | 0.00179 | 7.98              | 0.82            | Tef           |
| 1450484_a_at       | -4.18          | 0.00022 | 0.0018  | 5.16              | 1.11            | Cmpk2         |
| 1435334_at         | -4.18          | 0.00022 | 0.0018  | 5.21              | 0.96            | Ttc7          |
| 1425179_at         | -4.18          | 0.00022 | 0.00181 | 11.01             | 0.61            | Shmt1         |
| 1423394_at         | -4.18          | 0.00022 | 0.00181 | 9.54              | 0.66            | Pcyox1        |
| 1438450_at         | -4.18          | 0.00022 | 0.00181 | 5.46              | 1.07            | Lin7a         |
| 1425686_at         | -4.18          | 0.00022 | 0.00182 | 7.06              | 1               | Cflar         |
| 1438980_x_at       | -4.18          | 0.00022 | 0.00183 | 11.29             | 0.68            | Pm20d1        |
| 1433094_at         | -4.18          | 0.00022 | 0.00183 | 2.71              | 0.76            | Slc1a2        |
| 1425239_at         | -4.17          | 0.00022 | 0.00183 | 5.24              | 1.09            | Setd4         |
| 1435802_at         | -4.17          | 0.00022 | 0.00183 | 2.8               | 0.66            | Zbtb45        |
| 1450403_at         | -4.17          | 0.00022 | 0.00183 | 6.76              | 1.18            | Stat2         |
| 1422478_a_at       | -4.17          | 0.00023 | 0.00184 | 10.18             | 0.84            | Acss2         |
| 1436532_at         | -4.16          | 0.00023 | 0.00188 | 4.2               | 1.13            | Dclk3         |
| 1426858_at         | -4.16          | 0.00023 | 0.00188 | 4.75              | 1.45            | Inhbb         |
| 1420013_s_at       | -4.16          | 0.00024 | 0.00191 | 7.9               | 1.1             | Lss           |
| 1428014_at         | -4.15          | 0.00024 | 0.00193 | 4.16              | 0.84            | Hist1h4h      |
| 1423127_at         | -4.15          | 0.00024 | 0.00193 | 9.84              | 0.68            | Impa1         |
| 1452501_at         | -4.15          | 0.00024 | 0.00194 | 10.38             | 0.58            | Cyp2c38       |
| 1424012_at         | -4.15          | 0.00024 | 0.00194 | 3.89              | 0.8             | Ttc30a1       |
| 1415871_at         | -4.15          | 0.00024 | 0.00194 | 8.72              | 0.69            | Tgfbi         |
| 1439069_a_at       | -4.15          | 0.00024 | 0.00194 | 9.05              | 0.74            | 4933439C20Rik |
| 1449013_at         | -4.15          | 0.00024 | 0.00195 | 2.59              | 0.58            | Eef2k         |
| 1451456_at         | -4.14          | 0.00024 | 0.00195 | 6.08              | 0.97            | 6430706D22Rik |
| 1451416_a_at       | -4.14          | 0.00025 | 0.00197 | 5.06              | 1.09            | Tgm1          |
| 1451625_a_at       | -4.14          | 0.00025 | 0.00198 | 12.97             | 0.51            | C8g           |
| 1444138_at         | -4.14          | 0.00025 | 0.002   | 7.84              | 1.03            | Cyp2r1        |
| 1418982_at         | -4.14          | 0.00025 | 0.002   | 10.54             | 0.66            | Cebpa         |
| 1460645_at         | -4.13          | 0.00025 | 0.002   | 9.86              | 0.71            | Chordc1       |
| 1449385_at         | -4.13          | 0.00025 | 0.00201 | 11.02             | 0.94            | Hsd17b6       |
| 1422751_at         | -4.13          | 0.00025 | 0.00202 | 8.14              | 0.92            | Tle1          |
| 1416855_at         | -4.13          | 0.00025 | 0.00202 | 8.54              | 0.86            | Gas1          |
| 1438561_x_at       | -4.13          | 0.00025 | 0.00202 | 6.16              | 1.13            | Tmem180       |
| 1431251_at         | -4.13          | 0.00026 | 0.00204 | 7.59              | 1.06            | Lrrc3         |
| 1446812_at         | -4.13          | 0.00026 | 0.00204 | 3.57              | 0.85            | LOC100040515  |
| 1417534_at         | -4.12          | 0.00026 | 0.00205 | 8.68              | 0.67            | Itgb5         |
| 1452494_s_at       | -4.12          | 0.00026 | 0.00205 | 13.13             | 0.54            | Slco1b2       |
| 1448569_at         | -4.12          | 0.00026 | 0.00205 | 6.14              | 1.1             | 2410014A08Rik |
| 1422198_a_at       | -4.12          | 0.00026 | 0.00206 | 9.38              | 0.67            | Shmt1         |
| 1443863_at         | -4.12          | 0.00026 | 0.00206 | 7.42              | 0.78            | Fndc3a        |
| 1423569_at         | -4.12          | 0.00026 | 0.00208 | 4.93              | 1.11            | Gatm          |
| 1425985_s_at       | -4.11          | 0.00027 | 0.0021  | 9.02              | 0.73            | Masp1         |
| 1451651_at         | -4.11          | 0.00027 | 0.00211 | 10.79             | 1.26            | Vsig4         |
| 1440992_at         | -4.11          | 0.00027 | 0.00212 | 3.96              | 0.94            | 3110052M02Rik |
| 1426207_at         | -4.11          | 0.00027 | 0.00213 | 9.63              | 0.66            | Ikbkb         |
| 1434945_at         | -4.11          | 0.00027 | 0.00213 | 3.96              | 1.37            | Lpcat2        |

| Probe <sup>1</sup> | t <sup>2</sup> | p-value | q-value | Mean <sup>3</sup> | FC <sup>4</sup> | Symbol        |
|--------------------|----------------|---------|---------|-------------------|-----------------|---------------|
| 1422160_at         | -4.1           | 0.00027 | 0.00213 | 3.43              | 0.95            | H2-T24        |
| 1418529_at         | -4.1           | 0.00028 | 0.00215 | 7.63              | 0.8             | Osgep         |
| 1451217_a_at       | -4.1           | 0.00028 | 0.00216 | 9.85              | 0.65            | Impmp1l       |
| 1438916_x_at       | -4.1           | 0.00028 | 0.00216 | 3.23              | 0.65            | 6720401G13Rik |
| 1441214_at         | -4.09          | 0.00028 | 0.00218 | 5.56              | 1.1             | Exph5         |
| 1423160_at         | -4.09          | 0.00028 | 0.00218 | 6.07              | 0.92            | Spred1        |
| 1419697_at         | -4.09          | 0.00028 | 0.0022  | 5.88              | 1.05            | Cxcl11        |
| 1451426_at         | -4.09          | 0.00029 | 0.00221 | 4.44              | 1.1             | Dhx58         |
| 1416225_at         | -4.08          | 0.00029 | 0.00225 | 13.8              | 0.43            | Adh1          |
| 1438021_at         | -4.08          | 0.0003  | 0.00228 | 8.75              | 0.68            | Rbm47         |
| 1438251_x_at       | -4.07          | 0.0003  | 0.00229 | 3.99              | 1.05            | Htra1         |
| 1441945_s_at       | -4.07          | 0.0003  | 0.0023  | 7.35              | 0.96            | Abhd14a       |
| 1436902_x_at       | -4.07          | 0.0003  | 0.0023  | 7.9               | 1.29            | Tmsb10        |
| 1423482_at         | -4.07          | 0.0003  | 0.00231 | 8.89              | 0.72            | Uros          |
| 1460085_at         | -4.07          | 0.0003  | 0.00232 | 5.03              | 1.61            | Zfp281        |
| 1442082_at         | -4.07          | 0.0003  | 0.00232 | 4.62              | 1.22            | C3ar1         |
| 1441315_s_at       | -4.06          | 0.00031 | 0.00233 | 10.57             | 0.75            | Slc19a2       |
| 1438602_s_at       | -4.06          | 0.00031 | 0.00233 | 7.73              | 0.83            | Masp1         |
| 1433770_at         | -4.06          | 0.00031 | 0.00234 | 8.4               | 0.82            | Dpysl2        |
| 1418706_at         | -4.06          | 0.00031 | 0.00236 | 12.39             | 0.58            | Slc38a3       |
| 1422126_a_at       | -4.06          | 0.00031 | 0.00236 | 7.06              | 0.96            | Nudt13        |
| 1427893_a_at       | -4.05          | 0.00031 | 0.00238 | 8                 | 1.01            | Pmvk          |
| 1426801_at         | -4.05          | 0.00032 | 0.00239 | 3.62              | 0.8             | Sep-08        |
| 1427351_s_at       | -4.05          | 0.00032 | 0.0024  | 9.03              | 2.25            | Igh-6         |
| 1416403_at         | -4.05          | 0.00032 | 0.0024  | 5.63              | 1.02            | Abcb10        |
| 1438915_at         | -4.05          | 0.00032 | 0.00242 | 3.33              | 0.66            | 6720401G13Rik |
| 1424516_at         | -4.05          | 0.00032 | 0.00242 | 6.98              | 0.99            | B230354K17Rik |
| 1455142_at         | -4.05          | 0.00032 | 0.00243 | 7.64              | 0.98            | Socs4         |
| 1455521_at         | -4.05          | 0.00032 | 0.00243 | 9.38              | 0.87            | Klf12         |
| 1417083_at         | -4.04          | 0.00032 | 0.00243 | 10.35             | 0.71            | Sec61b        |
| 1447285_at         | -4.04          | 0.00033 | 0.00245 | 7.86              | 1.17            | NA            |
| 1419483_at         | -4.04          | 0.00033 | 0.00246 | 4.18              | 0.86            | C3ar1         |
| 1417823_at         | -4.04          | 0.00033 | 0.00247 | 8.74              | 0.75            | Gcat          |
| 1453016_at         | -4.04          | 0.00033 | 0.00247 | 8                 | 0.8             | 2900042B11Rik |
| 1417316_at         | -4.03          | 0.00034 | 0.00252 | 10.12             | 0.69            | Them2         |
| 1417113_at         | -4.02          | 0.00034 | 0.00256 | 8.05              | 0.71            | Gmcl1         |
| 1450808_at         | -4.02          | 0.00034 | 0.00256 | 5.02              | 1.88            | Fpr1          |
| 1421410_a_at       | -4.02          | 0.00034 | 0.00256 | 5.83              | 1.16            | Pstpip2       |
| 1416833_at         | -4.02          | 0.00034 | 0.00256 | 8.23              | 1.25            | Keg1          |
| 1444998_at         | -4.02          | 0.00035 | 0.0026  | 5                 | 1               | NA            |
| 1424496_at         | -4.01          | 0.00035 | 0.00262 | 7.19              | 0.87            | 5133401N09Rik |
| 1449325_at         | -4.01          | 0.00035 | 0.00262 | 11.46             | 0.66            | Fads2         |
| 1456898_at         | -4.01          | 0.00035 | 0.00262 | 8.89              | 0.66            | Pura          |
| 1416620_at         | -4.01          | 0.00036 | 0.00265 | 5.64              | 0.97            | Smarcal1      |
| 1437287_at         | -4             | 0.00036 | 0.00266 | 11.87             | 0.59            | 1110020G09Rik |
| 1429006_s_at       | -4             | 0.00036 | 0.00267 | 4.52              | 1.16            | 2610110G12Rik |
| 1435595_at         | -4             | 0.00037 | 0.0027  | 8.22              | 1.23            | 1810011O10Rik |
| 1437773_x_at       | -4             | 0.00037 | 0.0027  | 11.33             | 0.64            | Ddx17         |
| 1428789_at         | -3.99          | 0.00037 | 0.00272 | 6.75              | 0.98            | Ralgps2       |
| 1424047_at         | -3.99          | 0.00037 | 0.00273 | 9.35              | 0.74            | Dera          |
| 1448465_at         | -3.99          | 0.00037 | 0.00273 | 11.16             | 0.6             | Nipsnap1      |
| 1454984_at         | -3.99          | 0.00037 | 0.00273 | 10.61             | 1.11            | Lifr          |
| 1425329_a_at       | -3.99          | 0.00038 | 0.00276 | 8.99              | 1.11            | Cyb5r3        |

| Probe <sup>1</sup> | t <sup>2</sup> | p-value | q-value | Mean <sup>3</sup> | FC <sup>4</sup> | Symbol        |
|--------------------|----------------|---------|---------|-------------------|-----------------|---------------|
| 1454966_at         | -3.99          | 0.00038 | 0.00276 | 7                 | 1               | Itga8         |
| 1455538_at         | -3.99          | 0.00038 | 0.00277 | 8.02              | 0.93            | 6330403M23Rik |
| 1418195_at         | -3.98          | 0.00038 | 0.00277 | 3.34              | 0.66            | Galnt10       |
| 1428526_at         | -3.98          | 0.00038 | 0.00278 | 9.14              | 0.72            | Lsmd1         |
| 1425503_at         | -3.98          | 0.00038 | 0.00278 | 8.66              | 0.67            | Gcnt2         |
| 1448655_at         | -3.98          | 0.00038 | 0.00278 | 10.46             | 0.65            | Lrp1          |
| 1441075_at         | -3.98          | 0.00039 | 0.00281 | 7.42              | 0.86            | Nostrin       |
| 1422954_at         | -3.97          | 0.00039 | 0.00284 | 2.93              | 0.87            | Zfp60         |
| 1427964_at         | -3.97          | 0.00039 | 0.00284 | 9.35              | 0.65            | Cmtm8         |
| 1434444_s_at       | -3.97          | 0.00039 | 0.00285 | 4.15              | 0.86            | Anapc1        |
| 1417804_at         | -3.97          | 0.00039 | 0.00285 | 3.87              | 1               | Rasgrp2       |
| 1456381_x_at       | -3.97          | 0.00039 | 0.00285 | 10.05             | 0.7             | Mcl1          |
| 1426447_at         | -3.97          | 0.00039 | 0.00285 | 3.84              | 0.8             | Nup35         |
| 1435247_at         | -3.97          | 0.0004  | 0.00285 | 7.99              | 0.85            | Uba5          |
| 1423554_at         | -3.97          | 0.0004  | 0.00285 | 6.85              | 0.97            | Ggcx          |
| 1434162_at         | -3.97          | 0.0004  | 0.00285 | 8.73              | 0.69            | 2700078E11Rik |
| 1421135_a_at       | -3.97          | 0.0004  | 0.00286 | 7.08              | 0.91            | Cnot8         |
| 1446536_at         | -3.97          | 0.0004  | 0.00288 | 3.23              | 0.74            | Sema6d        |
| 1423729_a_at       | -3.96          | 0.00041 | 0.00291 | 9.36              | 0.65            | Rnf181        |
| 1433786_x_at       | -3.96          | 0.00041 | 0.00291 | 10.93             | 0.58            | Serf2         |
| 1419537_at         | -3.96          | 0.00041 | 0.00291 | 3.97              | 1               | Tcfec         |
| 1431830_at         | -3.96          | 0.00041 | 0.00293 | 4                 | 0.86            | Zfp329        |
| 1460180_at         | -3.96          | 0.00041 | 0.00294 | 8.85              | 0.83            | Hexb          |
| 1455659_at         | -3.96          | 0.00041 | 0.00295 | 5.53              | 0.95            | Tmcc1         |
| 1452375_at         | -3.95          | 0.00041 | 0.00295 | 9.13              | 0.85            | Aldh4a1       |
| 1451307_at         | -3.95          | 0.00042 | 0.00296 | 7.83              | 0.87            | Mrpl14        |
| 1418672_at         | -3.95          | 0.00042 | 0.00297 | 11.04             | 0.62            | Akr1c13       |
| 1440284_at         | -3.95          | 0.00042 | 0.00298 | 5.1               | 1.42            | NA            |
| 1428505_at         | -3.95          | 0.00042 | 0.00298 | 8.43              | 0.7             | Ccdc90b       |
| 1448233_at         | -3.95          | 0.00042 | 0.00299 | 9.67              | 0.66            | Prnp          |
| 1418190_at         | -3.95          | 0.00042 | 0.00299 | 14.24             | 0.34            | Pon1          |
| 1416968_a_at       | -3.95          | 0.00042 | 0.00299 | 12.79             | 0.48            | Hsd3b7        |
| 1451936_a_at       | -3.94          | 0.00043 | 0.00301 | 5.37              | 0.93            | Txnrd2        |
| 1423648_at         | -3.94          | 0.00043 | 0.00303 | 9.52              | 0.81            | Pdia6         |
| 1435331_at         | -3.94          | 0.00043 | 0.00303 | 4.18              | 1.23            | Pyhin1        |
| 1422888_at         | -3.94          | 0.00043 | 0.00304 | 9.63              | 0.59            | Rnf5          |
| 1452944_at         | -3.94          | 0.00043 | 0.00304 | 9.4               | 0.88            | Afmid         |
| 1453004_at         | -3.94          | 0.00043 | 0.00305 | 9.07              | 0.83            | Slc22a23      |
| 1424515_at         | -3.94          | 0.00043 | 0.00305 | 3.89              | 0.92            | B230354K17Rik |
| 1452353_at         | -3.94          | 0.00044 | 0.00305 | 9.2               | 0.67            | Gpr155        |
| 1456333_a_at       | -3.94          | 0.00044 | 0.00306 | 3.98              | 0.96            | Arhgap6       |
| 1447277_s_at       | -3.93          | 0.00044 | 0.00309 | 11.8              | 0.59            | Pcyox1        |
| 1421092_at         | -3.93          | 0.00044 | 0.00311 | 7.58              | 1.14            | Serpina12     |
| 1422186_s_at       | -3.93          | 0.00045 | 0.00311 | 11.44             | 0.86            | Cyb5r3        |
| 1448535_at         | -3.93          | 0.00045 | 0.00312 | 5.85              | 0.94            | Elp4          |
| 1424743_at         | -3.93          | 0.00045 | 0.00313 | 6.47              | 0.99            | 2610003J06Rik |
| 1438649_x_at       | -3.92          | 0.00045 | 0.00314 | 12.06             | 0.53            | Pebp1         |
| 1421946_at         | -3.92          | 0.00045 | 0.00314 | 12.56             | 0.58            | Crp           |
| 1446090_at         | -3.92          | 0.00045 | 0.00315 | 3.17              | 0.58            | NA            |
| 1440879_at         | -3.92          | 0.00045 | 0.00316 | 5.19              | 1.15            | Abca9         |
| 1422597_at         | -3.92          | 0.00046 | 0.00317 | 4.16              | 0.79            | Mmp15         |
| 1455213_at         | -3.92          | 0.00046 | 0.00317 | 4.02              | 0.96            | 4930488E11Rik |
| 1419477_at         | -3.92          | 0.00046 | 0.00318 | 6.71              | 1.32            | Clec2d        |

| Probe <sup>1</sup> | t <sup>2</sup> | p-value | q-value | Mean <sup>3</sup> | FC <sup>4</sup> | Symbol        |
|--------------------|----------------|---------|---------|-------------------|-----------------|---------------|
| 1450201_at         | -3.92          | 0.00046 | 0.00318 | 12.56             | 0.62            | Proz          |
| 1460174_at         | -3.92          | 0.00046 | 0.00318 | 6.05              | 1.18            | Dexi          |
| 1422053_at         | -3.92          | 0.00046 | 0.00318 | 4.59              | 1.05            | Inhba         |
| 1429581_at         | -3.92          | 0.00046 | 0.00319 | 6.93              | 1.06            | Acad9         |
| 1453011_at         | -3.92          | 0.00046 | 0.00319 | 6.67              | 0.99            | Bdh2          |
| 1418446_at         | -3.91          | 0.00046 | 0.0032  | 7.01              | 1.03            | Slc16a2       |
| 1417292_at         | -3.91          | 0.00047 | 0.00322 | 8.77              | 1.44            | Ifi47         |
| 1428290_at         | -3.91          | 0.00047 | 0.00323 | 7.91              | 0.89            | Mipep         |
| 1420936_s_at       | -3.91          | 0.00047 | 0.00324 | 4.73              | 0.96            | Cpsf2         |
| 1453078_at         | -3.91          | 0.00047 | 0.00324 | 7.37              | 0.83            | 8430408J07Rik |
| 1439622_at         | -3.91          | 0.00047 | 0.00324 | 4.07              | 1.01            | Rassf4        |
| 1428767_at         | -3.91          | 0.00047 | 0.00324 | 7.58              | 0.91            | Gsdmd         |
| 1416539_at         | -3.9           | 0.00048 | 0.00326 | 6.82              | 0.95            | Siae          |
| 1418537_at         | -3.9           | 0.00048 | 0.00329 | 5.72              | 1.17            | Isoc2b        |
| 1417441_at         | -3.9           | 0.00048 | 0.00329 | 9.02              | 1.29            | Dnajc12       |
| 1434135_at         | -3.9           | 0.00048 | 0.0033  | 6.6               | 0.93            | B3galnt2      |
| 1430619_a_at       | -3.9           | 0.00049 | 0.00331 | 3.92              | 0.92            | Mvk           |
| 1454686_at         | -3.9           | 0.00049 | 0.00331 | 5.12              | 0.98            | 6430706D22Rik |
| 1424826_s_at       | -3.9           | 0.00049 | 0.00332 | 9.05              | 0.74            | Mtss1         |
| 1421741_at         | -3.89          | 0.00049 | 0.00333 | 9.27              | 3.59            | Cyp3a16       |
| 1420383_a_at       | -3.89          | 0.0005  | 0.00336 | 3.6               | 0.67            | Col4a3bp      |
| 1427127_x_at       | -3.89          | 0.0005  | 0.00338 | 7.23              | 1.13            | Hspa1b        |
| 1417857_at         | -3.89          | 0.0005  | 0.00339 | 8                 | 0.79            | Mmaa          |
| 1424886_at         | -3.88          | 0.0005  | 0.00339 | 9.61              | 0.58            | Ptprd         |
| 1426774_at         | -3.88          | 0.0005  | 0.00339 | 8.88              | 0.67            | Parp12        |
| 1429692_s_at       | -3.88          | 0.00051 | 0.00342 | 10.36             | 0.78            | Gch1          |
| 1431381_at         | -3.88          | 0.00051 | 0.00342 | 3.13              | 0.63            | 3110005L24Rik |
| 1434561_at         | -3.88          | 0.00051 | 0.00344 | 6.7               | 1.07            | Asxl1         |
| 1456777_at         | -3.88          | 0.00051 | 0.00345 | 8.78              | 0.77            | Mgam          |
| 1431133_at         | -3.88          | 0.00051 | 0.00345 | 3.77              | 0.82            | Arhgap18      |
| 1441727_s_at       | -3.87          | 0.00052 | 0.0035  | 7.11              | 1.09            | Zfp467        |
| 1426714_at         | -3.87          | 0.00052 | 0.0035  | 6.78              | 0.83            | Slc46a1       |
| 1431191_a_at       | -3.87          | 0.00053 | 0.00351 | 2.51              | 0.59            | Syt1          |
| 1433592_at         | -3.87          | 0.00053 | 0.00352 | 7.66              | 0.74            | Calm1         |
| 1429771_at         | -3.87          | 0.00053 | 0.00352 | 10.33             | 0.55            | 3110073H01Rik |
| 1418366_at         | -3.87          | 0.00053 | 0.00353 | 8.89              | 0.75            | Hist2h2aa1    |
| 1426278_at         | -3.86          | 0.00054 | 0.00356 | 7.35              | 1.19            | Ifi27         |
| 1424399_at         | -3.86          | 0.00054 | 0.00359 | 8.42              | 0.67            | Uck1          |
| 1449394_at         | -3.86          | 0.00054 | 0.00359 | 12.2              | 0.57            | Slco1b2       |
| 1419627_s_at       | -3.86          | 0.00054 | 0.0036  | 5.85              | 1.58            | Clec4n        |
| 1418367_x_at       | -3.85          | 0.00055 | 0.00361 | 9.57              | 0.72            | Hist2h2aa1    |
| 1435824_at         | -3.85          | 0.00055 | 0.00361 | 8.68              | 0.65            | Yy1           |
| 1449086_at         | -3.85          | 0.00055 | 0.00361 | 6.33              | 0.95            | Rnf141        |
| 1419132_at         | -3.85          | 0.00055 | 0.00361 | 4.66              | 1.59            | Tlr2          |
| 1417606_a_at       | -3.85          | 0.00055 | 0.00363 | 12.91             | 0.58            | Calr          |
| 1439266_a_at       | -3.85          | 0.00056 | 0.00367 | 7.65              | 0.88            | Polr3k        |
| 1449848_at         | -3.85          | 0.00056 | 0.00367 | 4.41              | 1.27            | Gna14         |
| 1425548_a_at       | -3.85          | 0.00056 | 0.00367 | 3.15              | 0.93            | Lst1          |
| 1434864_at         | -3.85          | 0.00056 | 0.00367 | 3.85              | 0.8             | Nipa1         |
| 1450612_a_at       | -3.85          | 0.00056 | 0.00367 | 10.48             | 0.53            | Pemt          |
| 1416782_s_at       | -3.84          | 0.00056 | 0.00368 | 4                 | 0.86            | Praf2         |
| 1419599_s_at       | -3.84          | 0.00056 | 0.00369 | 6.14              | 1.57            | Ms4a6d        |
| 1428944_at         | -3.84          | 0.00056 | 0.00369 | 6.6               | 0.86            | Uba6          |



| Probe <sup>1</sup> | t <sup>2</sup> | p-value | q-value | Mean <sup>3</sup> | FC <sup>4</sup> | Symbol        |
|--------------------|----------------|---------|---------|-------------------|-----------------|---------------|
| 1435846_x_at       | -3.84          | 0.00057 | 0.00372 | 4.73              | 0.95            | NA            |
| 1423597_at         | -3.84          | 0.00057 | 0.00372 | 4.43              | 1.09            | Atp8a1        |
| 1441047_at         | -3.84          | 0.00057 | 0.00372 | 2.64              | 0.55            | Slc45a4       |
| 1451654_x_at       | -3.84          | 0.00057 | 0.00372 | 8.22              | 0.81            | Zfp825        |
| 1452472_at         | -3.84          | 0.00057 | 0.00373 | 6.05              | 1.01            | Rtp3          |
| 1458327_x_at       | -3.84          | 0.00057 | 0.00373 | 8.45              | 0.68            | Slc26a1       |
| 1424775_at         | -3.84          | 0.00058 | 0.00375 | 4.88              | 1.03            | Oas1g         |
| 1460631_at         | -3.83          | 0.00058 | 0.00378 | 9.61              | 0.73            | Ogt           |
| 1428585_at         | -3.83          | 0.00058 | 0.00379 | 7.76              | 0.91            | Actn1         |
| 1438549_a_at       | -3.83          | 0.00058 | 0.0038  | 9.27              | 0.62            | Srr           |
| 1438029_at         | -3.83          | 0.00058 | 0.0038  | 6.1               | 1               | 4930535B03Rik |
| 1439846_at         | -3.83          | 0.00059 | 0.00384 | 5.02              | 1.08            | Klf12         |
| 1436256_at         | -3.83          | 0.00059 | 0.00384 | 7.61              | 0.95            | Grpel2        |
| 1430623_s_at       | -3.82          | 0.00059 | 0.00385 | 5.93              | 1.39            | Obfc2a        |
| 1417620_at         | -3.82          | 0.00059 | 0.00385 | 3.13              | 0.93            | Rac2          |
| 1435574_at         | -3.82          | 0.0006  | 0.00385 | 5.64              | 0.97            | Chordc1       |
| 1418500_at         | -3.82          | 0.0006  | 0.00387 | 3.97              | 0.81            | Nap113        |
| 1437185_s_at       | -3.82          | 0.0006  | 0.00388 | 10.56             | 0.78            | Tmsb10        |
| 1423555_a_at       | -3.82          | 0.00061 | 0.00391 | 4.57              | 1.32            | Ifi44         |
| 1448770_a_at       | -3.82          | 0.00061 | 0.00391 | 9.36              | 0.74            | Atpif1        |
| 1424024_at         | -3.81          | 0.00061 | 0.00392 | 12.13             | 0.5             | Mcfcd2        |
| 1452771_s_at       | -3.81          | 0.00061 | 0.00393 | 7.38              | 0.93            | Acsl3         |
| 1437341_x_at       | -3.81          | 0.00062 | 0.004   | 8.51              | 0.86            | Cnp           |
| 1415950_a_at       | -3.8           | 0.00063 | 0.00401 | 11.01             | 0.58            | Pebp1         |
| 1450958_at         | -3.8           | 0.00063 | 0.00402 | 8.42              | 0.85            | Tm4sf1        |
| 1454973_at         | -3.8           | 0.00063 | 0.00405 | 7.78              | 0.91            | Atf7ip        |
| 1428707_at         | -3.8           | 0.00064 | 0.00407 | 9.72              | 0.63            | Ptms          |
| 1460684_at         | -3.8           | 0.00064 | 0.00408 | 11.04             | 0.65            | Tm7sf2        |
| 1434034_at         | -3.8           | 0.00064 | 0.00409 | 3.59              | 0.76            | Cerk          |
| 1424440_at         | -3.79          | 0.00064 | 0.0041  | 5.76              | 0.93            | Mrps6         |
| 1431566_at         | -3.79          | 0.00065 | 0.0041  | 3.3               | 0.66            | 9030622O22Rik |
| 1418480_at         | -3.79          | 0.00065 | 0.00411 | 3.59              | 1.05            | Ppbb          |
| 1436788_at         | -3.79          | 0.00065 | 0.00411 | 7.31              | 0.77            | Acp2          |
| 1444394_at         | -3.79          | 0.00065 | 0.00411 | 3.46              | 0.65            | Acad9         |
| 1417568_at         | -3.79          | 0.00065 | 0.00413 | 7.29              | 1.05            | Ncald         |
| 1433854_at         | -3.79          | 0.00065 | 0.00413 | 6.03              | 1.11            | Tmem164       |
| 1432026_a_at       | -3.79          | 0.00065 | 0.00413 | 4.98              | 1.23            | Herc5         |
| 1434465_x_at       | -3.79          | 0.00066 | 0.00414 | 8.12              | 1.45            | Vldlr         |
| 1416514_a_at       | -3.79          | 0.00066 | 0.00415 | 8.26              | 0.93            | Fscn1         |
| 1452374_at         | -3.79          | 0.00066 | 0.00416 | 6.64              | 0.93            | Zfp322a       |
| 1416376_at         | -3.79          | 0.00066 | 0.00416 | 9.29              | 0.84            | Tmem97        |
| 1419687_at         | -3.78          | 0.00066 | 0.00417 | 8.67              | 0.68            | Macrodl       |
| 1415906_at         | -3.78          | 0.00066 | 0.00418 | 11.93             | 0.86            | Tmsb4x        |
| 1437242_at         | -3.78          | 0.00067 | 0.00419 | 3.47              | 0.62            | Ttll12        |
| 1425993_a_at       | -3.78          | 0.00068 | 0.00424 | 9.62              | 0.79            | Hsph1         |
| 1450090_at         | -3.78          | 0.00068 | 0.00424 | 5.22              | 1.08            | Zfp101        |
| 1435668_at         | -3.78          | 0.00068 | 0.00425 | 3.76              | 0.73            | 4932442K08Rik |
| 1447500_at         | -3.77          | 0.00068 | 0.00426 | 6.92              | 1.45            | Cux2          |
| 1416749_at         | -3.77          | 0.00069 | 0.00428 | 5                 | 1.34            | Htra1         |
| 1428367_at         | -3.77          | 0.00069 | 0.00429 | 8.87              | 0.62            | Ndst1         |
| 1430421_a_at       | -3.77          | 0.00069 | 0.0043  | 11.89             | 0.5             | Tmem205       |
| 1418337_at         | -3.77          | 0.00069 | 0.00431 | 6.45              | 0.98            | Rpia          |
| 1430513_at         | -3.77          | 0.00069 | 0.00432 | 3.66              | 0.69            | 1700055N04Rik |

| Probe <sup>1</sup> | t <sup>2</sup> | p-value | q-value | Mean <sup>3</sup> | FC <sup>4</sup> | Symbol        |
|--------------------|----------------|---------|---------|-------------------|-----------------|---------------|
| 1457287_at         | -3.77          | 0.00069 | 0.00432 | 7.77              | 0.73            | NA            |
| 1448566_at         | -3.77          | 0.0007  | 0.00433 | 10.7              | 0.63            | Slc40a1       |
| 1422041_at         | -3.76          | 0.0007  | 0.00435 | 5.12              | 1.17            | Pilrb1        |
| 1441536_at         | -3.76          | 0.0007  | 0.00435 | 3.59              | 0.91            | Hmgcs1        |
| 1418461_at         | -3.76          | 0.0007  | 0.00435 | 3.88              | 0.72            | Sh3d19        |
| 1424867_a_at       | -3.76          | 0.0007  | 0.00435 | 11.86             | 0.54            | Glyat         |
| 1449905_at         | -3.76          | 0.00072 | 0.00443 | 9.39              | 0.99            | Clec4f        |
| 1434001_at         | -3.76          | 0.00072 | 0.00443 | 8.11              | 0.74            | Ttc9c         |
| 1416079_a_at       | -3.75          | 0.00072 | 0.00446 | 8.98              | 0.58            | Arpc1a        |
| 1416896_at         | -3.75          | 0.00072 | 0.00447 | 4.72              | 0.98            | Rps6ka1       |
| 1451825_a_at       | -3.75          | 0.00073 | 0.00449 | 10.1              | 0.53            | Copz1         |
| 1437756_at         | -3.75          | 0.00073 | 0.00449 | 6.67              | 1.39            | Gimap9        |
| 1421915_a_at       | -3.75          | 0.00073 | 0.00449 | 5.62              | 1.04            | St3gal3       |
| 1417784_at         | -3.75          | 0.00073 | 0.00449 | 3.73              | 0.82            | Als2          |
| 1436098_at         | -3.75          | 0.00073 | 0.00449 | 10.79             | 0.54            | Bche          |
| 1451161_a_at       | -3.75          | 0.00074 | 0.00452 | 7.96              | 1.12            | Emr1          |
| 1460177_at         | -3.74          | 0.00074 | 0.00453 | 8.26              | 0.82            | Cndp2         |
| 1455724_at         | -3.74          | 0.00074 | 0.00455 | 3.5               | 0.64            | NA            |
| 1416880_at         | -3.74          | 0.00074 | 0.00456 | 9.69              | 0.72            | Mcl1          |
| 1452676_a_at       | -3.74          | 0.00075 | 0.00456 | 8.06              | 0.71            | Pnpt1         |
| 1421487_a_at       | -3.74          | 0.00075 | 0.00457 | 7.03              | 0.87            | Nck1          |
| 1426133_a_at       | -3.74          | 0.00075 | 0.00457 | 6.72              | 1.03            | Mitd1         |
| 1423746_at         | -3.74          | 0.00075 | 0.00457 | 9.87              | 0.63            | Txndc5        |
| 1423458_at         | -3.74          | 0.00076 | 0.00461 | 2.82              | 0.53            | Slc35a5       |
| 1444439_at         | -3.73          | 0.00076 | 0.00465 | 3.95              | 0.72            | Bri3bp        |
| 1453300_at         | -3.73          | 0.00077 | 0.00469 | 8.61              | 0.7             | Slc35d2       |
| 1441960_x_at       | -3.73          | 0.00078 | 0.00471 | 6.59              | 0.76            | 5730494M16Rik |
| 1445271_at         | -3.73          | 0.00078 | 0.00471 | 4.04              | 0.8             | 9230105E10Rik |
| 1440795_x_at       | -3.73          | 0.00078 | 0.00471 | 7.84              | 0.76            | Rabep2        |
| 1425201_a_at       | -3.72          | 0.00078 | 0.00472 | 7.62              | 0.8             | Hyi           |
| 1418641_at         | -3.72          | 0.00078 | 0.00473 | 4.62              | 1.14            | Lcp2          |
| 1454075_s_at       | -3.72          | 0.00079 | 0.00475 | 4.23              | 0.75            | Nudt13        |
| 1452678_a_at       | -3.72          | 0.00079 | 0.00475 | 7.75              | 1.02            | Ccbl1         |
| 1427329_a_at       | -3.72          | 0.0008  | 0.00481 | 8.91              | 1.38            | Igh-6         |
| 1435382_at         | -3.72          | 0.0008  | 0.00481 | 5.19              | 0.89            | Ndn           |
| 1436562_at         | -3.72          | 0.0008  | 0.00481 | 6.77              | 0.8             | Ddx58         |
| 1437503_a_at       | -3.72          | 0.0008  | 0.00481 | 10.59             | 0.73            | Scotin        |
| 1448484_at         | -3.71          | 0.00081 | 0.00487 | 9.16              | 0.66            | Amd1          |
| 1447584_s_at       | -3.71          | 0.00082 | 0.00488 | 4.24              | 0.88            | Myct1         |
| 1419872_at         | -3.71          | 0.00082 | 0.0049  | 10.76             | 0.98            | Csf1r         |
| 1420653_at         | -3.71          | 0.00082 | 0.0049  | 3.55              | 1               | Tgfb1         |
| 1437910_at         | -3.71          | 0.00082 | 0.00491 | 3.89              | 0.79            | Tmem39b       |
| 1419582_at         | -3.7           | 0.00082 | 0.00492 | 3.37              | 0.76            | Cyp2c55       |
| 1421322_a_at       | -3.7           | 0.00084 | 0.00499 | 7.14              | 1.23            | Irf9          |
| 1441814_s_at       | -3.7           | 0.00084 | 0.00499 | 7.73              | 0.75            | Rpain         |
| 1455500_at         | -3.7           | 0.00084 | 0.005   | 7.47              | 0.82            | Rnf213        |
| 1450792_at         | -3.7           | 0.00084 | 0.005   | 9.06              | 1.51            | Tyrobp        |
| 1448823_at         | -3.7           | 0.00084 | 0.005   | 10.66             | 0.53            | Cxcl12        |
| 1439188_at         | -3.7           | 0.00084 | 0.005   | 3.02              | 0.53            | Cpsf6         |
| 1419091_a_at       | -3.69          | 0.00086 | 0.00507 | 7.03              | 0.95            | Anxa2         |
| 1435692_at         | -3.69          | 0.00086 | 0.00507 | 5.51              | 1.09            | Kctd21        |
| 1431722_a_at       | -3.69          | 0.00086 | 0.00507 | 4.17              | 0.97            | Afmid         |
| 1435328_at         | -3.69          | 0.00086 | 0.00508 | 6.34              | 0.94            | Cyhr1         |

| Probe <sup>1</sup> | t <sup>2</sup> | p-value | q-value | Mean <sup>3</sup> | FC <sup>4</sup> | Symbol        |
|--------------------|----------------|---------|---------|-------------------|-----------------|---------------|
| 1451548_at         | -3.69          | 0.00086 | 0.00509 | 10.63             | 1.22            | Upp2          |
| 1420915_at         | -3.69          | 0.00086 | 0.00509 | 6.05              | 1.15            | Stat1         |
| 1434631_at         | -3.69          | 0.00086 | 0.00509 | 4.49              | 0.81            | D3Erttd751e   |
| 1425365_a_at       | -3.69          | 0.00087 | 0.0051  | 8.96              | 0.67            | Cyp2d13       |
| 1431109_at         | -3.69          | 0.00087 | 0.0051  | 7.51              | 0.81            | Prr16         |
| 1441413_at         | -3.69          | 0.00087 | 0.00511 | 5.09              | 0.9             | Cat           |
| 1454736_at         | -3.68          | 0.00087 | 0.00513 | 7.87              | 0.81            | Ankrd57       |
| 1440769_at         | -3.68          | 0.00088 | 0.00515 | 4.26              | 0.96            | 2010305A19Rik |
| 1448369_at         | -3.68          | 0.00088 | 0.00517 | 4.44              | 0.95            | Pola2         |
| 1424969_s_at       | -3.68          | 0.00088 | 0.00517 | 9.83              | 1.19            | Upp2          |
| 1449139_at         | -3.68          | 0.00089 | 0.0052  | 9.6               | 0.6             | 2310008M10Rik |
| 1419972_at         | -3.67          | 0.0009  | 0.00521 | 5.33              | 0.84            | Slc35a5       |
| 1422001_at         | -3.67          | 0.0009  | 0.00521 | 9.15              | 0.75            | Inhbc         |
| 1423959_at         | -3.67          | 0.0009  | 0.00521 | 6.23              | 1.13            | Ropn1l        |
| 1460387_a_at       | -3.67          | 0.0009  | 0.00523 | 6.09              | 0.98            | Siae          |
| 1454638_a_at       | -3.67          | 0.0009  | 0.00523 | 14.51             | 0.38            | Pah           |
| 1421326_at         | -3.67          | 0.0009  | 0.00524 | 4.13              | 1.38            | Csf2rb        |
| 1428657_at         | -3.67          | 0.00091 | 0.00525 | 10.23             | 0.59            | Rreb1         |
| 1417773_at         | -3.67          | 0.00091 | 0.00525 | 4.59              | 1.01            | Nans          |
| 1433685_a_at       | -3.67          | 0.00091 | 0.00527 | 8.64              | 0.68            | 6430706D22Rik |
| 1455318_at         | -3.67          | 0.00092 | 0.00529 | 4.31              | 1.35            | Timd4         |
| 1450939_at         | -3.67          | 0.00092 | 0.0053  | 2.73              | 0.82            | Entpd1        |
| 1452261_at         | -3.66          | 0.00092 | 0.00532 | 6.06              | 0.87            | Shprh         |
| 1418825_at         | -3.66          | 0.00093 | 0.00535 | 8.84              | 0.9             | Irgm          |
| 1438389_x_at       | -3.66          | 0.00093 | 0.00535 | 3.25              | 0.6             | Acly          |
| 1460443_at         | -3.66          | 0.00093 | 0.00537 | 3.5               | 0.61            | Brms1l        |
| 1425687_at         | -3.66          | 0.00094 | 0.00538 | 4.36              | 0.86            | Cflar         |
| 1419738_a_at       | -3.66          | 0.00094 | 0.0054  | 7.74              | 1.5             | Tpm2          |
| 1416958_at         | -3.66          | 0.00094 | 0.0054  | 11.16             | 0.55            | Nr1d2         |
| 1417975_at         | -3.66          | 0.00094 | 0.00541 | 4.05              | 0.75            | Kpna4         |
| 1451627_a_at       | -3.65          | 0.00095 | 0.00543 | 9.18              | 0.73            | Slc1a2        |
| 1453757_at         | -3.65          | 0.00095 | 0.00546 | 4.04              | 0.96            | Herc5         |
| 1460454_at         | -3.65          | 0.00095 | 0.00546 | 3.47              | 0.64            | Glod5         |
| 1452257_at         | -3.65          | 0.00096 | 0.00549 | 12.74             | 0.55            | Bdh1          |
| 1430554_at         | -3.65          | 0.00096 | 0.00549 | 4.06              | 0.8             | Lrig3         |
| 1447643_x_at       | -3.65          | 0.00096 | 0.00549 | 7.33              | 0.71            | Snai2         |
| 1452883_a_at       | -3.65          | 0.00096 | 0.00551 | 8.86              | 0.61            | 2310002J21Rik |
| 1417498_at         | -3.64          | 0.00097 | 0.00556 | 12.75             | 0.55            | Serpinf2      |
| 1417582_s_at       | -3.64          | 0.00097 | 0.00556 | 5.51              | 0.88            | Dhodh         |
| 1452734_at         | -3.64          | 0.00098 | 0.00556 | 12.42             | 0.44            | Rnaset2a      |
| 1452761_a_at       | -3.64          | 0.00098 | 0.00558 | 5.11              | 0.94            | 8430436O14Rik |
| 1421411_at         | -3.64          | 0.00098 | 0.0056  | 5.14              | 0.97            | Pstpip2       |
| 1426780_at         | -3.64          | 0.00098 | 0.0056  | 5.81              | 0.91            | D14Erttd436e  |
| 1425436_x_at       | -3.63          | 0.001   | 0.00567 | 2.8               | 0.63            | Klra9         |
| 1433851_at         | -3.63          | 0.001   | 0.00567 | 7.47              | 0.84            | Ppp4r2        |
| 1450406_a_at       | -3.63          | 0.00101 | 0.0057  | 8.84              | 0.68            | St3gal3       |
| 1450660_at         | -3.63          | 0.00101 | 0.00571 | 8.65              | 0.64            | Pts           |
| 1435991_at         | -3.63          | 0.00101 | 0.00571 | 6.02              | 0.93            | Nr3c2         |
| 1417929_at         | -3.63          | 0.00101 | 0.00573 | 3.54              | 0.78            | Slc7a8        |
| 1423219_a_at       | -3.63          | 0.00102 | 0.00574 | 7.08              | 0.83            | Mrpl49        |
| 1459741_x_at       | -3.63          | 0.00102 | 0.00574 | 4.27              | 0.98            | Ucp2          |
| 1435520_at         | -3.63          | 0.00102 | 0.00574 | 5.05              | 0.83            | Msi2          |
| 1416248_at         | -3.63          | 0.00102 | 0.00576 | 10.78             | 0.47            | Nadk          |

| Probe <sup>1</sup> | t <sup>2</sup> | p-value | q-value | Mean <sup>3</sup> | FC <sup>4</sup> | Symbol             |
|--------------------|----------------|---------|---------|-------------------|-----------------|--------------------|
| 1455182_at         | -3.63          | 0.00102 | 0.00576 | 4.3               | 0.86            | Kif1b              |
| 1451973_at         | -3.62          | 0.00103 | 0.0058  | 7.57              | 0.88            | Uba5               |
| 1455994_x_at       | -3.62          | 0.00103 | 0.00581 | 9.06              | 0.61            | Elov11             |
| 1416261_at         | -3.62          | 0.00103 | 0.00581 | 8.41              | 0.83            | Tmem19             |
| 1448619_at         | -3.62          | 0.00103 | 0.00582 | 8.73              | 0.96            | Dhcr7              |
| 1433953_at         | -3.62          | 0.00103 | 0.00582 | 8.84              | 0.58            | Zfp277             |
| 1416083_at         | -3.62          | 0.00104 | 0.00582 | 9.99              | 0.64            | Zfand5             |
| 1419821_s_at       | -3.62          | 0.00104 | 0.00585 | 12.4              | 0.51            | Idh1               |
| 1435792_at         | -3.62          | 0.00104 | 0.00585 | 6.74              | 1.28            | Csprs              |
| 1439847_s_at       | -3.62          | 0.00104 | 0.00585 | 9.22              | 0.85            | Klf12              |
| 1448724_at         | -3.62          | 0.00104 | 0.00585 | 5.36              | 0.96            | Cish               |
| 1450629_at         | -3.62          | 0.00104 | 0.00585 | 8.2               | 0.69            | Lima1              |
| 1437156_at         | -3.62          | 0.00105 | 0.00585 | 8.26              | 0.96            | Necab1             |
| 1426293_at         | -3.61          | 0.00105 | 0.00588 | 5.17              | 1.07            | Zfp790             |
| 1437132_x_at       | -3.61          | 0.00107 | 0.00597 | 6.76              | 1.22            | Nedd9              |
| 1423556_at         | -3.61          | 0.00107 | 0.00597 | 3.81              | 1.2             | Akr1b7             |
| 1425712_at         | -3.61          | 0.00107 | 0.00598 | 9.29              | 0.71            | BC025446           |
| 1418697_at         | -3.61          | 0.00108 | 0.00599 | 11.95             | 0.49            | Inmt               |
| 1421108_at         | -3.61          | 0.00108 | 0.00599 | 10.99             | 0.55            | Cml2               |
| 1427301_at         | -3.6           | 0.00109 | 0.00603 | 5.15              | 1.32            | Cd48               |
| 1457034_at         | -3.6           | 0.00109 | 0.00603 | 8                 | 0.88            | D14Abb1e           |
| 1436213_a_at       | -3.6           | 0.0011  | 0.00611 | 4.9               | 0.85            | 1110028C15Rik      |
| 1423161_s_at       | -3.6           | 0.00111 | 0.00612 | 5.4               | 0.81            | Spred1             |
| 1426389_at         | -3.59          | 0.00111 | 0.00615 | 7.36              | 0.89            | Camk1d             |
| 1452395_at         | -3.59          | 0.00112 | 0.00616 | 7.15              | 0.74            | Med19              |
| 1445641_at         | -3.59          | 0.00112 | 0.00619 | 3.11              | 0.9             | Elov16             |
| 1437212_at         | -3.59          | 0.00112 | 0.00619 | 4.12              | 0.96            | Zfp420             |
| 1450455_s_at       | -3.59          | 0.00112 | 0.00619 | 12.14             | 0.49            | Akr1c12            |
| 1433838_at         | -3.59          | 0.00113 | 0.00621 | 6.57              | 0.78            | Dars2              |
| 1423695_at         | -3.59          | 0.00114 | 0.00625 | 7.51              | 0.77            | Edem2              |
| 1435271_at         | -3.58          | 0.00114 | 0.00626 | 3.55              | 0.84            | Irf3               |
| 1434245_a_at       | -3.58          | 0.00114 | 0.00626 | 7.24              | 0.79            | Cybasc3            |
| 1435829_at         | -3.58          | 0.00114 | 0.00626 | 7.03              | 0.83            | Zmat1              |
| 1417104_at         | -3.58          | 0.00115 | 0.00629 | 3.04              | 0.65            | Emp3               |
| 1426988_at         | -3.58          | 0.00115 | 0.00629 | 5                 | 0.96            | Klhdc5             |
| 1449618_s_at       | -3.58          | 0.00115 | 0.00629 | 6.89              | 0.93            | 2900092E17Rik      |
| 1439012_a_at       | -3.58          | 0.00115 | 0.00631 | 7.71              | 0.86            | Dck                |
| 1452008_at         | -3.58          | 0.00116 | 0.00632 | 6.5               | 1.02            | 1810054D07Rik      |
| 1439302_at         | -3.58          | 0.00116 | 0.00632 | 3.69              | 0.7             | Uba6               |
| 1425719_a_at       | -3.58          | 0.00116 | 0.00633 | 9.18              | 0.59            | Nmi                |
| 1439293_at         | -3.58          | 0.00116 | 0.00633 | 8.59              | 0.75            | BC031353           |
| 1422978_at         | -3.58          | 0.00117 | 0.00636 | 5.67              | 1.76            | Cybb               |
| 1421191_s_at       | -3.57          | 0.00117 | 0.00637 | 7.79              | 0.65            | Gopc               |
| 1433827_at         | -3.57          | 0.00117 | 0.00638 | 4.58              | 0.99            | Atp8a1             |
| 1451255_at         | -3.57          | 0.00118 | 0.00642 | 8.8               | 0.66            | Lsr                |
| 1436585_at         | -3.57          | 0.00119 | 0.00644 | 4.08              | 0.72            | BB182297           |
| 1440522_at         | -3.57          | 0.0012  | 0.00648 | 7.14              | 0.76            | ENSMUSG00000073019 |
| 1455597_at         | -3.57          | 0.0012  | 0.00648 | 7.77              | 0.61            | Map3k2             |
| 1437380_x_at       | -3.56          | 0.00121 | 0.00653 | 10.55             | 0.57            | Pgd                |
| 1424134_at         | -3.56          | 0.00121 | 0.00653 | 6.91              | 0.82            | Rspry1             |
| 1442510_at         | -3.56          | 0.00121 | 0.00653 | 7.94              | 0.75            | 5830473C10Rik      |
| 1424065_at         | -3.56          | 0.00121 | 0.00653 | 10.4              | 0.54            | Edem1              |
| 1420838_at         | -3.56          | 0.00122 | 0.00655 | 5.11              | 1.06            | Ntrk2              |

| Probe <sup>1</sup> | t <sup>2</sup> | p-value | q-value | Mean <sup>3</sup> | FC <sup>4</sup> | Symbol        |
|--------------------|----------------|---------|---------|-------------------|-----------------|---------------|
| 1424717_at         | -3.56          | 0.00123 | 0.0066  | 6.21              | 0.91            | Mis12         |
| 1429514_at         | -3.56          | 0.00123 | 0.0066  | 11.79             | 0.51            | Ppap2b        |
| 1423663_at         | -3.56          | 0.00123 | 0.00661 | 6.02              | 1.01            | Flcn          |
| 1433575_at         | -3.55          | 0.00124 | 0.00663 | 7.42              | 0.77            | NA            |
| 1435878_at         | -3.55          | 0.00124 | 0.00664 | 5.91              | 0.88            | Stk38l        |
| 1435237_at         | -3.55          | 0.00124 | 0.00666 | 8.6               | 0.62            | 2310009A05Rik |
| 1435381_at         | -3.55          | 0.00125 | 0.00667 | 3.45              | 0.67            | 2610110G12Rik |
| 1452560_a_at       | -3.55          | 0.00125 | 0.00667 | 3.75              | 0.7             | Nfya          |
| 1454748_at         | -3.55          | 0.00125 | 0.00668 | 9.91              | 0.55            | Naprt1        |
| 1422499_at         | -3.55          | 0.00126 | 0.00672 | 7.31              | 0.75            | Lima1         |
| 1424770_at         | -3.55          | 0.00127 | 0.00675 | 10.8              | 0.49            | Cald1         |
| 1448441_at         | -3.54          | 0.00127 | 0.00677 | 3.94              | 0.69            | Cks1b         |
| 1438971_x_at       | -3.54          | 0.00128 | 0.0068  | 9.34              | 0.62            | Ube2h         |
| 1429185_at         | -3.54          | 0.00128 | 0.00681 | 7.24              | 0.92            | 4631416L12Rik |
| 1456331_at         | -3.54          | 0.00128 | 0.00681 | 4.61              | 1.02            | 9130023H24Rik |
| 1455236_x_at       | -3.54          | 0.00128 | 0.00683 | 11.31             | 0.53            | Serf2         |
| 1443708_at         | -3.54          | 0.00129 | 0.00683 | 3.26              | 0.54            | BC068281      |
| 1426896_at         | -3.54          | 0.00129 | 0.00683 | 4.23              | 0.9             | Zfp191        |
| 1417531_at         | -3.54          | 0.00129 | 0.00683 | 12.9              | 0.46            | Cyp2j5        |
| 1423924_s_at       | -3.54          | 0.00129 | 0.00685 | 6.02              | 0.85            | Tspan14       |
| 1456103_at         | -3.54          | 0.0013  | 0.00688 | 4.92              | 0.87            | Pml           |
| 1450207_at         | -3.54          | 0.0013  | 0.00688 | 3.81              | 1.52            | Lifr          |
| 1451247_at         | -3.54          | 0.0013  | 0.00688 | 8.94              | 0.66            | Mfsd1         |
| 1418930_at         | -3.54          | 0.0013  | 0.0069  | 5.16              | 1.11            | Cxcl10        |
| 1435475_at         | -3.53          | 0.00131 | 0.00692 | 6.95              | 0.77            | Lman2l        |
| 1433843_at         | -3.53          | 0.00131 | 0.00692 | 5.24              | 0.88            | Hs1bp3        |
| 1456583_x_at       | -3.53          | 0.00131 | 0.00694 | 3.58              | 0.64            | Tmem144       |
| 1424080_at         | -3.53          | 0.00132 | 0.00695 | 5.9               | 0.87            | Dcps          |
| 1459929_at         | -3.53          | 0.00132 | 0.00696 | 3.53              | 0.61            | Zfp568        |
| 1452737_at         | -3.53          | 0.00132 | 0.00697 | 10.17             | 0.58            | 2810008M24Rik |
| 1428381_a_at       | -3.53          | 0.00132 | 0.00697 | 10.16             | 0.53            | 2700038C09Rik |
| 1448301_s_at       | -3.53          | 0.00134 | 0.00703 | 6.72              | 1.17            | Serpinb1a     |
| 1447830_s_at       | -3.53          | 0.00134 | 0.00704 | 6.43              | 1.54            | Rgs2          |
| 1448436_a_at       | -3.53          | 0.00134 | 0.00704 | 7.39              | 1.07            | Irf1          |
| 1425107_a_at       | -3.52          | 0.00134 | 0.00704 | 10.92             | 1.59            | Lifr          |
| 1427961_s_at       | -3.52          | 0.00134 | 0.00704 | 12.44             | 0.44            | Ugt2b34       |
| 1416735_at         | -3.52          | 0.00134 | 0.00704 | 10.09             | 0.6             | Asah1         |
| 1449933_a_at       | -3.52          | 0.00134 | 0.00704 | 5.37              | 0.83            | 5730449L18Rik |
| 1449024_a_at       | -3.52          | 0.00135 | 0.00705 | 10.48             | 0.51            | Hexa          |
| 1452090_a_at       | -3.52          | 0.00135 | 0.00709 | 5.3               | 0.89            | Olfm3         |
| 1439872_at         | -3.52          | 0.00136 | 0.0071  | 3.4               | 1.12            | NA            |
| 1416948_at         | -3.52          | 0.00136 | 0.0071  | 9.63              | 0.58            | Mrpl23        |
| 1424135_at         | -3.52          | 0.00136 | 0.00712 | 8.27              | 0.73            | Rspry1        |
| 1454558_at         | -3.52          | 0.00137 | 0.00717 | 2.89              | 0.54            | 5430416B10Rik |
| 1422445_at         | -3.52          | 0.00138 | 0.00718 | 6.33              | 0.85            | Itga6         |
| 1445379_at         | -3.51          | 0.00138 | 0.00719 | 5.82              | 1.42            | Atp11c        |
| 1450900_at         | -3.51          | 0.00138 | 0.00719 | 9                 | 0.54            | Smek2         |
| 1422062_at         | -3.51          | 0.00139 | 0.00721 | 4.55              | 1.42            | Msr1          |
| 1418499_a_at       | -3.51          | 0.00139 | 0.00721 | 3.9               | 0.77            | Kcne3         |
| 1422925_s_at       | -3.51          | 0.0014  | 0.00726 | 12.25             | 0.64            | Acot3         |
| 1427496_at         | -3.51          | 0.0014  | 0.00728 | 3.21              | 0.64            | Cep152        |
| 1456656_at         | -3.51          | 0.00141 | 0.00732 | 5.44              | 0.98            | Lin7a         |
| 1437069_at         | -3.5           | 0.00141 | 0.00733 | 8.25              | 0.78            | Osbpl8        |

| Probe <sup>1</sup> | t <sup>2</sup> | p-value | q-value | Mean <sup>3</sup> | FC <sup>4</sup> | Symbol        |
|--------------------|----------------|---------|---------|-------------------|-----------------|---------------|
| 1419873_s_at       | -3.5           | 0.00142 | 0.00734 | 8.62              | 1.17            | Csf1r         |
| 1454728_s_at       | -3.5           | 0.00144 | 0.00743 | 5.16              | 1.21            | Atp8a1        |
| 1422508_at         | -3.5           | 0.00144 | 0.00744 | 9.21              | 0.61            | Atp6v1a       |
| 1439144_at         | -3.5           | 0.00144 | 0.00746 | 5.05              | 0.84            | Cwf19l1       |
| 1450188_s_at       | -3.5           | 0.00145 | 0.00746 | 4.61              | 0.93            | Lipg          |
| 1421074_at         | -3.49          | 0.00146 | 0.00749 | 10.13             | 0.94            | Cyp7b1        |
| 1455595_at         | -3.49          | 0.00146 | 0.00752 | 13.3              | 0.42            | Ugt2b36       |
| 1423701_at         | -3.49          | 0.00147 | 0.00754 | 10.58             | 0.48            | Coasy         |
| 1426734_at         | -3.49          | 0.00147 | 0.00754 | 4.87              | 0.81            | BC022623      |
| 1435330_at         | -3.49          | 0.00149 | 0.00763 | 3.89              | 0.98            | Pyhin1        |
| 1426907_s_at       | -3.48          | 0.00149 | 0.00763 | 3.95              | 0.74            | Dhx57         |
| 1451141_at         | -3.48          | 0.00149 | 0.00764 | 5.21              | 0.83            | Mettl8        |
| 1457472_at         | -3.48          | 0.0015  | 0.00768 | 3.85              | 0.71            | Gigyf2        |
| 1428625_a_at       | -3.48          | 0.00151 | 0.0077  | 7.33              | 0.69            | Rmi1          |
| 1417974_at         | -3.48          | 0.00152 | 0.00774 | 9.17              | 0.61            | Kpna4         |
| 1442100_at         | -3.48          | 0.00152 | 0.00775 | 3.66              | 0.66            | Inpp5f        |
| 1452893_s_at       | -3.48          | 0.00153 | 0.00778 | 5.93              | 1.35            | 2310040A07Rik |
| 1417846_at         | -3.48          | 0.00153 | 0.00778 | 7.96              | 0.73            | Ulk2          |
| 1420727_a_at       | -3.47          | 0.00153 | 0.00779 | 6.95              | 0.78            | Tmlhe         |
| 1418240_at         | -3.47          | 0.00154 | 0.00779 | 6.8               | 1.19            | Gbp2          |
| 1424245_at         | -3.47          | 0.00154 | 0.00779 | 8.42              | 1.22            | Ces2          |
| 1438028_at         | -3.47          | 0.00154 | 0.0078  | 4.95              | 0.9             | 4930535B03Rik |
| 1452050_at         | -3.47          | 0.00154 | 0.00781 | 9.25              | 0.66            | Camk1d        |
| 1454268_a_at       | -3.47          | 0.00155 | 0.00782 | 7.04              | 1.47            | Cyba          |
| 1417651_at         | -3.47          | 0.00156 | 0.00786 | 13.52             | 0.43            | Cyp2c29       |
| 1448390_a_at       | -3.46          | 0.00158 | 0.00798 | 10.97             | 0.51            | Dhrs3         |
| 1430650_at         | -3.46          | 0.00159 | 0.008   | 3.78              | 0.71            | Zfp191        |
| 1437207_at         | -3.46          | 0.00159 | 0.00801 | 6.84              | 0.95            | Rnf170        |
| 1427076_at         | -3.46          | 0.00159 | 0.00802 | 10.27             | 0.86            | Mpeg1         |
| 1416113_at         | -3.46          | 0.0016  | 0.00803 | 9.1               | 0.58            | Fkbp8         |
| 1433806_x_at       | -3.46          | 0.0016  | 0.00803 | 11.34             | 0.57            | Calr          |
| 1435905_at         | -3.46          | 0.0016  | 0.00803 | 3.11              | 0.55            | D3Erttd300e   |
| 1438547_x_at       | -3.46          | 0.0016  | 0.00803 | 9.08              | 0.64            | Tor2a         |
| 1426292_at         | -3.46          | 0.0016  | 0.00805 | 4.38              | 0.92            | Zfp790        |
| 1458314_at         | -3.46          | 0.0016  | 0.00805 | 4.93              | 1.01            | Slc1a2        |
| 1429299_at         | -3.46          | 0.00161 | 0.00807 | 7.1               | 0.86            | Ddah1         |
| 1431609_a_at       | -3.46          | 0.00161 | 0.00808 | 10.48             | 0.52            | Acp5          |
| 1440006_at         | -3.46          | 0.00161 | 0.00808 | 3.11              | 0.57            | BC026600      |
| 1428851_at         | -3.45          | 0.00162 | 0.00812 | 9.65              | 0.56            | 1300014I06Rik |
| 1418474_at         | -3.45          | 0.00163 | 0.00814 | 5.04              | 0.77            | 1500005A01Rik |
| 1418547_at         | -3.45          | 0.00163 | 0.00815 | 11.25             | 0.52            | Tfpi2         |
| 1437892_at         | -3.45          | 0.00163 | 0.00815 | 7.79              | 0.89            | Zkscan3       |
| 1456174_x_at       | -3.45          | 0.00163 | 0.00816 | 8.81              | 0.71            | Ndrp1         |
| 1451330_a_at       | -3.45          | 0.00165 | 0.00823 | 9.64              | 0.53            | Inpp5b        |
| 1422072_a_at       | -3.45          | 0.00165 | 0.00823 | 7.36              | 0.99            | Gstm6         |
| 1456563_at         | -3.45          | 0.00166 | 0.00826 | 4.14              | 0.83            | 4933429F08Rik |
| 1434170_at         | -3.44          | 0.00167 | 0.00828 | 4.89              | 0.9             | Wdr40b        |
| 1452877_at         | -3.44          | 0.00167 | 0.00828 | 6.65              | 0.77            | 2700029M09Rik |
| 1438930_s_at       | -3.44          | 0.00167 | 0.0083  | 3.63              | 0.64            | Mecp2         |
| 1416181_at         | -3.44          | 0.00167 | 0.0083  | 9.26              | 0.61            | Mesdc2        |
| 1428325_at         | -3.44          | 0.00168 | 0.0083  | 5.6               | 0.87            | Cnpy4         |
| 1444314_at         | -3.44          | 0.00168 | 0.0083  | 3.38              | 0.59            | Rbm4b         |
| 1450714_at         | -3.44          | 0.00168 | 0.0083  | 9.98              | 0.5             | Azin1         |

| Probe <sup>1</sup> | t <sup>2</sup> | p-value | q-value | Mean <sup>3</sup> | FC <sup>4</sup> | Symbol        |
|--------------------|----------------|---------|---------|-------------------|-----------------|---------------|
| 1416768_at         | -3.44          | 0.00168 | 0.00831 | 10.1              | 0.49            | 1110003E01Rik |
| 1425676_a_at       | -3.44          | 0.00168 | 0.00831 | 7.38              | 0.72            | Elovl1        |
| 1419504_at         | -3.44          | 0.00168 | 0.00832 | 2.94              | 0.67            | Mogat1        |
| 1449195_s_at       | -3.44          | 0.00169 | 0.00836 | 5.35              | 1.04            | Cxcl16        |
| 1440384_at         | -3.44          | 0.0017  | 0.00837 | 3.94              | 0.66            | Tmcc1         |
| 1456530_x_at       | -3.43          | 0.00172 | 0.00846 | 8.56              | 0.67            | Elovl1        |
| 1454798_at         | -3.43          | 0.00173 | 0.00853 | 4.1               | 0.71            | Rbm15b        |
| 1428190_at         | -3.43          | 0.00173 | 0.00853 | 10.21             | 0.53            | Slc25a1       |
| 1417374_at         | -3.43          | 0.00174 | 0.00856 | 11.23             | 0.5             | Tuba4a        |
| 1427428_at         | -3.43          | 0.00174 | 0.00856 | 10.12             | 0.74            | Clec4g        |
| 1454964_at         | -3.43          | 0.00174 | 0.00856 | 5.6               | 0.88            | BC021395      |
| 1424308_at         | -3.42          | 0.00175 | 0.00861 | 3.68              | 1.49            | Slc24a3       |
| 1416223_at         | -3.42          | 0.00176 | 0.00863 | 5.22              | 0.97            | Sh3bp5l       |
| 1443838_x_at       | -3.42          | 0.00177 | 0.00868 | 8.64              | 0.75            | Fads2         |
| 1442436_at         | -3.42          | 0.00178 | 0.00869 | 3.22              | 0.57            | Fn3k          |
| 1437226_x_at       | -3.42          | 0.00178 | 0.00869 | 7.95              | 0.88            | Marcks1l      |
| 1424769_s_at       | -3.42          | 0.00178 | 0.0087  | 12.82             | 0.44            | Cald1         |
| 1428547_at         | -3.42          | 0.00179 | 0.00873 | 10.51             | 0.55            | Nt5e          |
| 1422962_a_at       | -3.42          | 0.00179 | 0.00873 | 8.54              | 0.93            | Psmb8         |
| 1435806_at         | -3.42          | 0.00179 | 0.00873 | 3.65              | 0.65            | D530033C11Rik |
| 1417142_at         | -3.42          | 0.00179 | 0.00873 | 4.57              | 0.88            | 4932442K08Rik |
| 1428416_at         | -3.42          | 0.00179 | 0.00873 | 4.17              | 0.76            | 3110050N22Rik |
| 1424483_at         | -3.42          | 0.0018  | 0.00876 | 6.83              | 0.84            | Mobkl1b       |
| 1449374_at         | -3.41          | 0.0018  | 0.00877 | 10.55             | 0.5             | Pipox         |
| 1438007_at         | -3.41          | 0.0018  | 0.00877 | 8.74              | 1.57            | AI851790      |
| 1430135_at         | -3.41          | 0.00181 | 0.0088  | 6.33              | 0.81            | Dnase2a       |
| 1450699_at         | -3.41          | 0.00181 | 0.0088  | 11.62             | 0.51            | Selenbp1      |
| 1431936_a_at       | -3.41          | 0.00182 | 0.00882 | 3.16              | 0.53            | Neu2          |
| 1424821_at         | -3.41          | 0.00183 | 0.00887 | 13.06             | 0.43            | Ndfip1        |
| 1455166_at         | -3.41          | 0.00183 | 0.00889 | 8.83              | 0.67            | Arl5b         |
| 1437687_x_at       | -3.41          | 0.00183 | 0.00889 | 10.42             | 0.49            | Fkbp9         |
| 1422812_at         | -3.41          | 0.00183 | 0.00889 | 3.63              | 0.74            | Cxcr6         |
| 1448513_a_at       | -3.41          | 0.00184 | 0.00892 | 10.87             | 0.46            | Npc2          |
| 1442648_at         | -3.4           | 0.00185 | 0.00895 | 2.62              | 0.5             | Zfp563        |
| 1444691_at         | -3.4           | 0.00185 | 0.00897 | 10.41             | 0.8             | Prkd3         |
| 1434577_at         | -3.4           | 0.00185 | 0.00897 | 6.1               | 0.94            | BC052040      |
| 1437868_at         | -3.4           | 0.00185 | 0.00897 | 7.29              | 1.26            | BC023892      |
| 1449341_a_at       | -3.4           | 0.00186 | 0.00897 | 4.89              | 0.84            | Stom          |
| 1416662_at         | -3.4           | 0.00186 | 0.00897 | 11.31             | 0.55            | Sardh         |
| 1422818_at         | -3.4           | 0.00186 | 0.00901 | 7.01              | 1.05            | Nedd9         |
| 1423549_at         | -3.4           | 0.00187 | 0.00901 | 2.68              | 0.51            | Slc1a4        |
| 1419655_at         | -3.4           | 0.00187 | 0.00904 | 4.64              | 0.81            | Tle3          |
| 1433529_at         | -3.4           | 0.00188 | 0.00906 | 5.54              | 0.82            | E430002G05Rik |
| 1435967_s_at       | -3.4           | 0.00189 | 0.00908 | 12.28             | 0.45            | Hibadh        |
| 1437811_x_at       | -3.4           | 0.00189 | 0.00908 | 3.91              | 0.78            | NA            |
| 1439787_at         | -3.39          | 0.0019  | 0.00913 | 3.33              | 0.71            | P2rx7         |
| 1435389_at         | -3.39          | 0.00191 | 0.00919 | 8.02              | 0.7             | Reps2         |
| 1422771_at         | -3.39          | 0.00191 | 0.00919 | 6.66              | 0.84            | Smad6         |
| 1423879_at         | -3.39          | 0.00192 | 0.00919 | 5.58              | 0.87            | D030056L22Rik |
| 1453540_at         | -3.39          | 0.00192 | 0.0092  | 3.72              | 0.61            | 5430404G13Rik |
| 1436436_at         | -3.39          | 0.00192 | 0.00922 | 3.24              | 0.56            | Cnih4         |
| 1451493_at         | -3.39          | 0.00193 | 0.00922 | 11.2              | 0.47            | Ndfip1        |
| 1457671_at         | -3.39          | 0.00193 | 0.00922 | 4.54              | 0.98            | 9330120H11Rik |

| Probe <sup>1</sup> | t <sup>2</sup> | p-value | q-value | Mean <sup>3</sup> | FC <sup>4</sup> | Symbol        |
|--------------------|----------------|---------|---------|-------------------|-----------------|---------------|
| 1451475_at         | -3.39          | 0.00193 | 0.00922 | 6.01              | 0.82            | Plxnd1        |
| 1453422_a_at       | -3.39          | 0.00193 | 0.00922 | 9.3               | 0.56            | 1110020G09Rik |
| 1429954_at         | -3.39          | 0.00193 | 0.00922 | 5.9               | 1.56            | Clec4a3       |
| 1424108_at         | -3.39          | 0.00194 | 0.00926 | 10.85             | 0.48            | Glo1          |
| 1453668_at         | -3.38          | 0.00195 | 0.00931 | 3.23              | 0.6             | 3110052M02Rik |
| 1438176_x_at       | -3.38          | 0.00195 | 0.00933 | 10.92             | 0.46            | 1110031B06Rik |
| 1453212_at         | -3.38          | 0.00196 | 0.00936 | 5.15              | 0.8             | Zfp383        |
| 1425079_at         | -3.38          | 0.00197 | 0.00936 | 9.09              | 0.56            | Tm6sf2        |
| 1424299_at         | -3.38          | 0.00197 | 0.00936 | 7.94              | 0.68            | Oma1          |
| 1419564_at         | -3.38          | 0.00197 | 0.00937 | 4.19              | 0.74            | Zfp467        |
| 1416119_at         | -3.38          | 0.00197 | 0.00937 | 12.87             | 0.43            | Txn1          |
| 1440085_at         | -3.37          | 0.002   | 0.00948 | 2.83              | 0.53            | Eda2r         |
| 1424794_at         | -3.37          | 0.002   | 0.00949 | 4.07              | 1.1             | Rnf186        |
| 1458439_a_at       | -3.37          | 0.002   | 0.00949 | 3.82              | 0.72            | Dzip3         |
| 1416607_at         | -3.37          | 0.00201 | 0.00951 | 12.52             | 0.45            | 4931406C07Rik |
| 1419259_at         | -3.37          | 0.00201 | 0.00951 | 7.67              | 0.67            | Rsu1          |
| 1445657_at         | -3.37          | 0.00201 | 0.00951 | 6.86              | 0.83            | AW111846      |
| 1428418_s_at       | -3.37          | 0.00202 | 0.00952 | 4.97              | 0.88            | 3110050N22Rik |
| 1455792_x_at       | -3.37          | 0.00202 | 0.00952 | 3.9               | 0.91            | Ndn           |
| 1439096_at         | -3.37          | 0.00202 | 0.00952 | 7.73              | 0.69            | Ddo           |
| 1458882_at         | -3.37          | 0.00202 | 0.00955 | 4.51              | 0.84            | Serpib8       |
| 1457644_s_at       | -3.37          | 0.00202 | 0.00955 | 6.05              | 0.82            | Cxcl1         |
| 1437086_at         | -3.37          | 0.00203 | 0.00956 | 4.25              | 3.28            | Ascl1         |
| 1416127_a_at       | -3.37          | 0.00203 | 0.00958 | 9.93              | 0.5             | Dnpep         |
| 1425057_at         | -3.37          | 0.00204 | 0.00962 | 10.96             | 0.49            | Pbld          |
| 1417075_at         | -3.36          | 0.00206 | 0.0097  | 10.35             | 0.48            | 2010309E21Rik |
| 1427762_x_at       | -3.36          | 0.00207 | 0.00971 | 3.82              | 0.59            | Hist1h2bp     |
| 1417255_at         | -3.36          | 0.00207 | 0.00971 | 4.64              | 0.81            | Ift140        |
| 1448923_at         | -3.36          | 0.00208 | 0.00975 | 7.89              | 0.7             | Prkra         |
| 1436736_x_at       | -3.36          | 0.00209 | 0.00981 | 7.88              | 0.97            | D0H4S114      |
| 1452733_at         | -3.36          | 0.00209 | 0.00982 | 7.79              | 0.59            | Rnf24         |
| 1436308_at         | -3.36          | 0.0021  | 0.00985 | 6.96              | 0.77            | Zfp292        |
| 1421212_at         | -3.35          | 0.00211 | 0.00987 | 8.79              | 0.61            | Abcc6         |
| 1424504_at         | -3.35          | 0.00212 | 0.00993 | 4.28              | 0.73            | Rab22a        |
| 1456537_at         | -3.35          | 0.00214 | 0.00999 | 3.27              | 0.84            | A930033H14Rik |

**Table S2b. Footnote**

Gene lists were generated using the Cyber-T method, with only genes with a *q*-value < 0.01 presented.

<sup>1</sup> *Probe* represents the Affymetrix probe set identifier.

<sup>2</sup> *t* represents the t-statistic output from the Cyber-T method.

<sup>3</sup> *Mean* represents the mean expression signal after normalization.

<sup>4</sup> *FC* represents the log<sub>2</sub> fold change in normalized signals.



**Table S3a.** Genes upregulated in muscle of *S6K<sup>-/-</sup>* mice compared to wild type mice.

| Probe <sup>1</sup> | t <sup>2</sup> | p-value  | q-value  | Mean <sup>3</sup> | FC <sup>4</sup> | Symbol        |
|--------------------|----------------|----------|----------|-------------------|-----------------|---------------|
| 1443621_at         | 15.75          | 1.00E-17 | 1.22E-13 | 5.08              | 3.47            | Xaf1          |
| 1433675_at         | 14.97          | 4.92E-17 | 2.86E-13 | 9.24              | 2.35            | Snord22       |
| 1439399_a_at       | 14.80          | 7.06E-17 | 2.86E-13 | 10.91             | 2.07            | Snhg1         |
| 1428942_at         | 12.61          | 9.01E-15 | 2.49E-11 | 9.81              | 3.15            | Mt2           |
| 1422557_s_at       | 12.56          | 1.02E-14 | 2.49E-11 | 10.53             | 3.11            | Mt1           |
| 1447936_at         | 12.26          | 2.04E-14 | 4.14E-11 | 9.72              | 2.56            | 2410006H16Rik |
| 1433674_a_at       | 12.05          | 3.41E-14 | 5.91E-11 | 9.56              | 2.37            | Snord22       |
| 1416067_at         | 11.87          | 5.26E-14 | 6.67E-11 | 11.30             | 1.61            | Ifrd1         |
| 1423233_at         | 11.82          | 5.98E-14 | 6.67E-11 | 11.72             | 2.39            | Cebpd         |
| 1436040_at         | 11.81          | 6.04E-14 | 6.67E-11 | 8.16              | 2.59            | LOC100039864  |
| 1444128_at         | 11.50          | 1.31E-13 | 1.32E-10 | 7.38              | 3.01            | Arhgap26      |
| 1430147_a_at       | 11.44          | 1.51E-13 | 1.41E-10 | 7.60              | 2.34            | Josd3         |
| 1419248_at         | 11.15          | 3.17E-13 | 2.75E-10 | 8.98              | 2.15            | Rgs2          |
| 1443116_at         | 11.11          | 3.49E-13 | 2.82E-10 | 6.96              | 2.81            | Psmc4         |
| 1426446_at         | 10.96          | 5.03E-13 | 3.62E-10 | 6.72              | 2.45            | 6430548M08Rik |
| 1434202_a_at       | 10.96          | 5.06E-13 | 3.62E-10 | 7.80              | 2.55            | BC055107      |
| 1430271_x_at       | 10.54          | 1.48E-12 | 9.99E-10 | 8.33              | 1.96            | Josd3         |
| 1453344_at         | 10.47          | 1.79E-12 | 1.14E-09 | 4.82              | 2.80            | 1810032O08Rik |
| 1459887_at         | 10.34          | 2.53E-12 | 1.53E-09 | 6.47              | 2.90            | Ube4a         |
| 1418589_a_at       | 10.29          | 2.84E-12 | 1.64E-09 | 12.07             | 1.15            | Mif1          |
| 1452096_s_at       | 10.00          | 6.16E-12 | 3.12E-09 | 10.07             | 2.30            | D230025D16Rik |
| 1428588_a_at       | 9.94           | 7.37E-12 | 3.58E-09 | 10.52             | 1.36            | Mrpl41        |
| 1416983_s_at       | 9.87           | 8.89E-12 | 4.15E-09 | 9.95              | 2.20            | Foxo1         |
| 1428529_at         | 9.85           | 9.29E-12 | 4.18E-09 | 8.63              | 1.87            | 2810026P18Rik |
| 1418932_at         | 9.83           | 9.88E-12 | 4.28E-09 | 8.26              | 2.68            | Nfil3         |
| 1457321_at         | 9.81           | 1.03E-11 | 4.33E-09 | 6.77              | 3.31            | D130037M23Rik |
| 1447830_s_at       | 9.67           | 1.52E-11 | 6.14E-09 | 8.51              | 2.20            | Rgs2          |
| 1438059_at         | 9.58           | 1.93E-11 | 7.55E-09 | 11.47             | 1.35            | 1700011I03Rik |
| 1425514_at         | 9.50           | 2.42E-11 | 9.19E-09 | 8.92              | 2.25            | Pik3r1        |
| 1448181_at         | 9.48           | 2.54E-11 | 9.33E-09 | 10.05             | 1.50            | Klf15         |
| 1424638_at         | 9.45           | 2.73E-11 | 9.76E-09 | 10.24             | 1.72            | Cdkn1a        |
| 1453435_a_at       | 9.40           | 3.15E-11 | 1.06E-08 | 9.20              | 1.45            | Fmo2          |
| 1456341_a_at       | 9.40           | 3.15E-11 | 1.06E-08 | 13.72             | 0.81            | Klf9          |
| 1426521_at         | 9.39           | 3.22E-11 | 1.06E-08 | 10.33             | 1.89            | D230025D16Rik |
| 1438798_at         | 9.33           | 3.80E-11 | 1.21E-08 | 10.22             | 1.59            | 4931406P16Rik |
| 1441649_at         | 9.32           | 3.91E-11 | 1.22E-08 | 5.73              | 2.48            | Sesn1         |
| 1416749_at         | 9.29           | 4.26E-11 | 1.29E-08 | 10.29             | 1.41            | Htra1         |
| 1449109_at         | 9.24           | 4.86E-11 | 1.37E-08 | 9.48              | 1.61            | Socs2         |
| 1427131_s_at       | 9.23           | 4.98E-11 | 1.37E-08 | 11.91             | 1.60            | Lrrc58        |
| 1454703_x_at       | 9.23           | 5.07E-11 | 1.37E-08 | 5.30              | 1.93            | Snhg1         |
| 1416981_at         | 9.22           | 5.20E-11 | 1.37E-08 | 9.28              | 2.32            | Foxo1         |
| 1426236_a_at       | 9.20           | 5.53E-11 | 1.42E-08 | 13.33             | 1.29            | Glul          |
| 1428589_at         | 9.19           | 5.60E-11 | 1.42E-08 | 9.72              | 1.32            | Mrpl41        |
| 1433993_at         | 9.18           | 5.88E-11 | 1.46E-08 | 9.95              | 1.38            | 4931406P16Rik |
| 1415927_at         | 9.14           | 6.48E-11 | 1.54E-08 | 12.68             | 1.26            | Actc1         |
| 1422470_at         | 9.12           | 6.80E-11 | 1.59E-08 | 13.26             | 0.73            | Bnip3         |
| 1452534_a_at       | 9.10           | 7.25E-11 | 1.64E-08 | 8.34              | 1.70            | Hmgb2         |
| 1444746_at         | 9.10           | 7.28E-11 | 1.64E-08 | 6.89              | 1.76            | Ptbp2         |
| 1422905_s_at       | 9.08           | 7.70E-11 | 1.64E-08 | 8.30              | 1.65            | Fmo2          |
| 1418507_s_at       | 9.08           | 7.76E-11 | 1.64E-08 | 9.49              | 1.67            | Socs2         |
| 1442714_at         | 9.08           | 7.77E-11 | 1.64E-08 | 4.92              | 2.33            | D130037M23Rik |

| Probe <sup>1</sup> | t <sup>2</sup> | p-value  | q-value  | Mean <sup>3</sup> | FC <sup>4</sup> | Symbol        |
|--------------------|----------------|----------|----------|-------------------|-----------------|---------------|
| 1452418_at         | 9.07           | 7.82E-11 | 1.64E-08 | 8.39              | 2.14            | 1200016E24Rik |
| 1419291_x_at       | 9.03           | 8.88E-11 | 1.83E-08 | 10.92             | 1.07            | Gas5          |
| 1423086_at         | 9.00           | 9.67E-11 | 1.96E-08 | 9.63              | 1.98            | Npc1          |
| 1417929_at         | 8.96           | 1.07E-10 | 2.14E-08 | 5.72              | 1.99            | Slc7a8        |
| 1427638_at         | 8.95           | 1.10E-10 | 2.16E-08 | 9.21              | 1.44            | Zbtb16        |
| 1422788_at         | 8.93           | 1.17E-10 | 2.20E-08 | 8.92              | 1.41            | Slc43a3       |
| 1457110_at         | 8.93           | 1.18E-10 | 2.20E-08 | 4.95              | 3.47            | Pank1         |
| 1454699_at         | 8.92           | 1.19E-10 | 2.20E-08 | 11.59             | 2.04            | Sesn1         |
| 1440506_at         | 8.92           | 1.21E-10 | 2.20E-08 | 9.70              | 2.77            | Slc7a2        |
| 1433717_at         | 8.92           | 1.22E-10 | 2.20E-08 | 9.77              | 1.53            | D19Wsu162e    |
| 1446148_x_at       | 8.90           | 1.27E-10 | 2.27E-08 | 7.56              | 1.74            | NA            |
| 1453287_at         | 8.89           | 1.29E-10 | 2.27E-08 | 8.48              | 1.84            | 5730557B15Rik |
| 1420150_at         | 8.88           | 1.34E-10 | 2.28E-08 | 9.09              | 1.90            | Spsb1         |
| 1444376_at         | 8.87           | 1.40E-10 | 2.36E-08 | 4.10              | 2.04            | Sesn1         |
| 1442744_at         | 8.81           | 1.65E-10 | 2.73E-08 | 8.10              | 1.62            | NA            |
| 1457801_at         | 8.80           | 1.66E-10 | 2.73E-08 | 5.97              | 2.45            | 9930024M15Rik |
| 1433711_s_at       | 8.78           | 1.79E-10 | 2.86E-08 | 10.85             | 2.34            | Sesn1         |
| 1438385_s_at       | 8.78           | 1.79E-10 | 2.86E-08 | 12.69             | 0.86            | Gpt2          |
| 1457117_at         | 8.74           | 1.98E-10 | 3.09E-08 | 5.07              | 3.62            | Nfe2l2        |
| 1455418_at         | 8.73           | 2.05E-10 | 3.15E-08 | 11.41             | 1.46            | NA            |
| 1416926_at         | 8.73           | 2.07E-10 | 3.15E-08 | 10.47             | 1.51            | Trp53inp1     |
| 1419301_at         | 8.71           | 2.17E-10 | 3.26E-08 | 10.19             | 1.19            | Fzd4          |
| 1444722_at         | 8.70           | 2.24E-10 | 3.31E-08 | 5.06              | 2.19            | NA            |
| 1453410_at         | 8.66           | 2.49E-10 | 3.65E-08 | 4.34              | 3.01            | Angptl4       |
| 1428288_at         | 8.62           | 2.77E-10 | 4.01E-08 | 13.30             | 0.73            | 2310051E17Rik |
| 1415994_at         | 8.62           | 2.83E-10 | 4.04E-08 | 10.66             | 2.57            | Cyp2e1        |
| 1452416_at         | 8.61           | 2.88E-10 | 4.07E-08 | 7.35              | 2.87            | Il6ra         |
| 1421679_a_at       | 8.59           | 3.07E-10 | 4.28E-08 | 6.29              | 2.24            | Cdkn1a        |
| 1433634_at         | 8.58           | 3.17E-10 | 4.37E-08 | 9.79              | 1.64            | Irf2bp2       |
| 1450505_a_at       | 8.57           | 3.22E-10 | 4.40E-08 | 11.52             | 1.62            | 1810015C04Rik |
| 1449410_a_at       | 8.51           | 3.81E-10 | 5.14E-08 | 10.59             | 1.12            | Gas5          |
| 1430020_x_at       | 8.46           | 4.37E-10 | 5.83E-08 | 10.20             | 1.21            | Hnrnpa1       |
| 1438931_s_at       | 8.46           | 4.45E-10 | 5.84E-08 | 12.13             | 1.66            | Sesn1         |
| 1427540_at         | 8.46           | 4.47E-10 | 5.84E-08 | 4.64              | 2.20            | Zwint         |
| 1436871_at         | 8.45           | 4.62E-10 | 5.97E-08 | 7.39              | 1.97            | Sfrs7         |
| 1428289_at         | 8.43           | 4.89E-10 | 6.25E-08 | 12.90             | 0.83            | 2310051E17Rik |
| 1438682_at         | 8.42           | 5.02E-10 | 6.34E-08 | 9.56              | 1.58            | Pik3r1        |
| 1455773_at         | 8.39           | 5.38E-10 | 6.73E-08 | 9.12              | 1.52            | NA            |
| 1446626_at         | 8.37           | 5.73E-10 | 7.10E-08 | 5.72              | 1.96            | D16H22S680E   |
| 1446147_at         | 8.36           | 5.84E-10 | 7.17E-08 | 8.01              | 1.52            | NA            |
| 1436763_a_at       | 8.31           | 6.79E-10 | 8.12E-08 | 10.23             | 1.24            | Klf9          |
| 1419247_at         | 8.31           | 6.87E-10 | 8.12E-08 | 6.93              | 2.08            | Rgs2          |
| 1457639_at         | 8.31           | 6.89E-10 | 8.12E-08 | 6.93              | 2.26            | Atp6v1h       |
| 1416617_at         | 8.28           | 7.37E-10 | 8.61E-08 | 9.46              | 1.40            | Accs1         |
| 1437658_a_at       | 8.26           | 7.87E-10 | 9.10E-08 | 5.38              | 1.80            | Snord22       |
| 1439949_at         | 8.26           | 7.98E-10 | 9.14E-08 | 4.83              | 2.01            | Gsk3b         |
| 1435459_at         | 8.25           | 8.07E-10 | 9.15E-08 | 8.58              | 1.70            | Fmo2          |
| 1439484_at         | 8.18           | 9.97E-10 | 1.10E-07 | 11.86             | 0.94            | Pde7a         |
| 1416982_at         | 8.17           | 1.03E-09 | 1.13E-07 | 8.61              | 2.48            | Foxo1         |
| 1436913_at         | 8.16           | 1.05E-09 | 1.14E-07 | 8.91              | 1.22            | Cdc14a        |
| 1422573_at         | 8.15           | 1.09E-09 | 1.17E-07 | 11.31             | 1.60            | Ampd3         |
| 1425529_s_at       | 8.14           | 1.11E-09 | 1.18E-07 | 9.21              | 1.45            | D19Wsu162e    |
| 1430019_a_at       | 8.13           | 1.16E-09 | 1.22E-07 | 11.34             | 1.07            | Hnrnpa1       |

| Probe <sup>1</sup> | t <sup>2</sup> | p-value  | q-value  | Mean <sup>3</sup> | FC <sup>4</sup> | Symbol        |
|--------------------|----------------|----------|----------|-------------------|-----------------|---------------|
| 1447839_x_at       | 8.07           | 1.35E-09 | 1.40E-07 | 4.25              | 1.80            | Adm           |
| 1427539_a_at       | 8.06           | 1.39E-09 | 1.43E-07 | 7.47              | 1.77            | Zwint         |
| 1436549_a_at       | 8.06           | 1.40E-09 | 1.43E-07 | 10.22             | 1.15            | Hnrnpa1       |
| 1440104_at         | 8.05           | 1.43E-09 | 1.44E-07 | 6.28              | 1.79            | Ranbp2        |
| 1448325_at         | 8.05           | 1.43E-09 | 1.44E-07 | 9.25              | 1.42            | Myd116        |
| 1435928_at         | 8.04           | 1.51E-09 | 1.50E-07 | 6.66              | 1.85            | 6430548M08Rik |
| 1444018_at         | 8.02           | 1.57E-09 | 1.55E-07 | 6.16              | 1.82            | B930098A02Rik |
| 1442745_x_at       | 8.02           | 1.60E-09 | 1.56E-07 | 8.50              | 1.39            | NA            |
| 1423622_a_at       | 8.00           | 1.66E-09 | 1.61E-07 | 8.78              | 1.29            | Ccn1          |
| 1441765_at         | 8.00           | 1.67E-09 | 1.61E-07 | 8.79              | 1.92            | NA            |
| 1438251_x_at       | 7.99           | 1.73E-09 | 1.64E-07 | 9.52              | 1.31            | Htra1         |
| 1438039_at         | 7.99           | 1.73E-09 | 1.64E-07 | 8.98              | 1.35            | Hectd1        |
| 1444195_at         | 7.98           | 1.80E-09 | 1.68E-07 | 5.43              | 1.86            | Rmnd5a        |
| 1438398_at         | 7.98           | 1.80E-09 | 1.68E-07 | 8.69              | 1.51            | Rbm39         |
| 1440417_at         | 7.96           | 1.91E-09 | 1.77E-07 | 5.80              | 1.66            | D19Erttd409e  |
| 1423172_at         | 7.95           | 1.93E-09 | 1.77E-07 | 9.15              | 1.28            | Napb          |
| 1455904_at         | 7.95           | 1.94E-09 | 1.77E-07 | 8.35              | 1.48            | Gas5          |
| 1447227_at         | 7.95           | 1.97E-09 | 1.78E-07 | 5.44              | 2.99            | Slc40a1       |
| 1459170_at         | 7.90           | 2.24E-09 | 2.01E-07 | 6.00              | 2.14            | Foxo1         |
| 1438420_at         | 7.89           | 2.32E-09 | 2.07E-07 | 10.50             | 1.02            | Rbm39         |
| 1420664_s_at       | 7.88           | 2.37E-09 | 2.10E-07 | 9.06              | 1.16            | Procr         |
| 1436222_at         | 7.85           | 2.59E-09 | 2.28E-07 | 7.54              | 1.51            | Gas5          |
| 1444564_at         | 7.85           | 2.62E-09 | 2.29E-07 | 7.98              | 1.95            | Apod          |
| 1416923_a_at       | 7.79           | 3.12E-09 | 2.69E-07 | 10.20             | 1.04            | Bnip3l        |
| 1434465_x_at       | 7.74           | 3.65E-09 | 3.10E-07 | 12.54             | 0.84            | Vldlr         |
| 1439163_at         | 7.73           | 3.69E-09 | 3.10E-07 | 10.88             | 1.37            | Zbtb16        |
| 1435872_at         | 7.73           | 3.75E-09 | 3.10E-07 | 9.76              | 1.47            | Pim1          |
| 1445263_at         | 7.72           | 3.77E-09 | 3.10E-07 | 7.23              | 1.73            | NA            |
| 1438459_x_at       | 7.72           | 3.78E-09 | 3.10E-07 | 9.52              | 1.12            | Sfpq          |
| 1429050_at         | 7.69           | 4.16E-09 | 3.39E-07 | 9.05              | 1.15            | Chic2         |
| 1433795_at         | 7.67           | 4.37E-09 | 3.53E-07 | 10.61             | 1.05            | Tgfbr3        |
| 1434424_at         | 7.67           | 4.47E-09 | 3.60E-07 | 10.69             | 1.00            | Flvcr1        |
| 1416927_at         | 7.66           | 4.58E-09 | 3.65E-07 | 6.49              | 2.28            | Trp53inp1     |
| 1436033_at         | 7.62           | 5.14E-09 | 4.06E-07 | 10.06             | 1.13            | BC031353      |
| 1440225_at         | 7.62           | 5.20E-09 | 4.08E-07 | 8.49              | 1.26            | Gpr116        |
| 1438992_x_at       | 7.61           | 5.28E-09 | 4.09E-07 | 10.56             | 0.94            | Atf4          |
| 1442026_at         | 7.61           | 5.29E-09 | 4.09E-07 | 8.17              | 1.40            | NA            |
| 1447923_at         | 7.60           | 5.48E-09 | 4.21E-07 | 9.82              | 1.21            | 1810026B05Rik |
| 1440533_at         | 7.57           | 5.97E-09 | 4.54E-07 | 5.41              | 1.85            | Bfar          |
| 1436325_at         | 7.57           | 5.98E-09 | 4.54E-07 | 10.28             | 1.11            | Rora          |
| 1416125_at         | 7.54           | 6.60E-09 | 4.98E-07 | 11.09             | 1.56            | Fkbp5         |
| 1452082_at         | 7.53           | 6.73E-09 | 5.04E-07 | 5.11              | 1.79            | 6430548M08Rik |
| 1416250_at         | 7.52           | 6.81E-09 | 5.07E-07 | 7.75              | 2.37            | Btg2          |
| 1458218_s_at       | 7.52           | 6.94E-09 | 5.14E-07 | 12.00             | 0.84            | Pde7a         |
| 1423314_s_at       | 7.51           | 7.09E-09 | 5.17E-07 | 10.87             | 1.03            | Pde7a         |
| 1449752_at         | 7.51           | 7.11E-09 | 5.17E-07 | 4.29              | 1.68            | Spsb1         |
| 1436202_at         | 7.50           | 7.23E-09 | 5.21E-07 | 11.11             | 1.29            | NA            |
| 1436650_at         | 7.49           | 7.50E-09 | 5.35E-07 | 9.50              | 1.57            | Filip1        |
| 1442169_at         | 7.49           | 7.58E-09 | 5.38E-07 | 9.58              | 1.08            | Vldlr         |
| 1434542_at         | 7.48           | 7.76E-09 | 5.48E-07 | 10.56             | 0.98            | Gpt2          |
| 1456717_at         | 7.44           | 8.71E-09 | 6.11E-07 | 4.43              | 2.21            | Tead1         |
| 1434505_a_at       | 7.42           | 9.22E-09 | 6.43E-07 | 4.97              | 1.63            | 6430548M08Rik |
| 1422264_s_at       | 7.40           | 9.75E-09 | 6.72E-07 | 11.52             | 0.96            | Klf9          |

| Probe <sup>1</sup> | t <sup>2</sup> | p-value  | q-value  | Mean <sup>3</sup> | FC <sup>4</sup> | Symbol        |
|--------------------|----------------|----------|----------|-------------------|-----------------|---------------|
| 1435694_at         | 7.40           | 9.86E-09 | 6.73E-07 | 8.22              | 2.50            | Arhgap26      |
| 1435084_at         | 7.39           | 1.03E-08 | 6.95E-07 | 9.13              | 1.33            | C730049O14Rik |
| 1429235_at         | 7.37           | 1.06E-08 | 7.14E-07 | 7.12              | 1.88            | Galntl2       |
| 1424457_at         | 7.35           | 1.14E-08 | 7.62E-07 | 5.75              | 1.61            | Apbb3         |
| 1443673_x_at       | 7.35           | 1.16E-08 | 7.70E-07 | 5.71              | 2.06            | NA            |
| 1427844_a_at       | 7.34           | 1.17E-08 | 7.71E-07 | 8.48              | 1.43            | Cebpb         |
| 1448747_at         | 7.34           | 1.17E-08 | 7.71E-07 | 13.67             | 1.03            | Fbxo32        |
| 1455305_x_at       | 7.33           | 1.20E-08 | 7.86E-07 | 10.59             | 0.95            | Hnrnpa1       |
| 1454635_at         | 7.32           | 1.25E-08 | 8.13E-07 | 10.95             | 0.94            | Fbxl3         |
| 1419754_at         | 7.31           | 1.28E-08 | 8.25E-07 | 7.61              | 1.68            | Myo5a         |
| 1437313_x_at       | 7.31           | 1.30E-08 | 8.37E-07 | 8.50              | 1.31            | Hmgb2         |
| 1427932_s_at       | 7.30           | 1.35E-08 | 8.61E-07 | 11.14             | 1.41            | 1200016E24Rik |
| 1438458_a_at       | 7.29           | 1.37E-08 | 8.71E-07 | 10.14             | 0.99            | Sfpq          |
| 1428306_at         | 7.29           | 1.39E-08 | 8.78E-07 | 10.46             | 2.34            | Ddit4         |
| 1440365_at         | 7.26           | 1.48E-08 | 9.29E-07 | 6.45              | 2.67            | Actb          |
| 1416077_at         | 7.25           | 1.53E-08 | 9.55E-07 | 5.99              | 2.00            | Adm           |
| 1423313_at         | 7.23           | 1.64E-08 | 1.01E-06 | 9.93              | 1.09            | Pde7a         |
| 1444749_at         | 7.22           | 1.67E-08 | 1.03E-06 | 5.36              | 2.37            | NA            |
| 1417562_at         | 7.20           | 1.78E-08 | 1.08E-06 | 11.39             | 1.57            | Eif4ebp1      |
| 1418901_at         | 7.16           | 2.00E-08 | 1.21E-06 | 11.19             | 1.12            | Cebpb         |
| 1430476_at         | 7.16           | 2.01E-08 | 1.21E-06 | 4.72              | 1.60            | Srp54b        |
| 1418135_at         | 7.16           | 2.02E-08 | 1.22E-06 | 9.51              | 1.22            | Aff1          |
| 1427200_at         | 7.15           | 2.09E-08 | 1.25E-06 | 11.58             | 1.05            | Zranb1        |
| 1458268_s_at       | 7.15           | 2.11E-08 | 1.25E-06 | 7.91              | 1.74            | Igfbp3        |
| 1427035_at         | 7.12           | 2.26E-08 | 1.33E-06 | 7.17              | 2.58            | Slc39a14      |
| 1451069_at         | 7.12           | 2.31E-08 | 1.35E-06 | 8.51              | 1.59            | Pim3          |
| 1418990_at         | 7.11           | 2.35E-08 | 1.36E-06 | 9.94              | 1.01            | Ms4a4d        |
| 1450933_at         | 7.11           | 2.36E-08 | 1.36E-06 | 11.51             | 0.90            | Pde7a         |
| 1435704_at         | 7.10           | 2.42E-08 | 1.39E-06 | 4.97              | 1.59            | C920006O11Rik |
| 1428011_a_at       | 7.09           | 2.50E-08 | 1.43E-06 | 11.85             | 0.90            | Erbp2ip       |
| 1442025_a_at       | 7.09           | 2.52E-08 | 1.44E-06 | 10.46             | 1.31            | NA            |
| 1437129_at         | 7.08           | 2.55E-08 | 1.44E-06 | 6.04              | 1.89            | E330018D03Rik |
| 1418091_at         | 7.08           | 2.56E-08 | 1.44E-06 | 5.71              | 1.93            | Tcfcp2l1      |
| 1440488_at         | 7.08           | 2.57E-08 | 1.44E-06 | 5.97              | 1.65            | NA            |
| 1423173_at         | 7.06           | 2.77E-08 | 1.55E-06 | 8.38              | 1.46            | Napb          |
| 1440831_at         | 7.05           | 2.79E-08 | 1.55E-06 | 11.00             | 0.86            | Bach1         |
| 1438041_at         | 7.05           | 2.83E-08 | 1.57E-06 | 10.68             | 1.06            | NA            |
| 1435943_at         | 7.05           | 2.86E-08 | 1.58E-06 | 8.22              | 1.37            | Dpep1         |
| 1452349_x_at       | 7.04           | 2.92E-08 | 1.60E-06 | 10.31             | 1.06            | Ifi205        |
| 1437230_at         | 7.04           | 2.94E-08 | 1.60E-06 | 6.26              | 1.92            | Kcna1         |
| 1425281_a_at       | 7.03           | 2.96E-08 | 1.60E-06 | 12.30             | 0.93            | Tsc22d3       |
| 1433148_at         | 7.03           | 2.98E-08 | 1.61E-06 | 4.18              | 1.44            | 4930513N20Rik |
| 1425515_at         | 7.03           | 3.01E-08 | 1.62E-06 | 7.82              | 1.56            | Pik3r1        |
| 1428255_at         | 7.02           | 3.08E-08 | 1.65E-06 | 6.01              | 1.63            | Luc7l         |
| 1429251_at         | 7.02           | 3.10E-08 | 1.65E-06 | 9.15              | 1.18            | Prdm2         |
| 1428071_at         | 7.01           | 3.23E-08 | 1.71E-06 | 10.73             | 1.04            | 1110038D17Rik |
| 1453255_at         | 7.00           | 3.26E-08 | 1.71E-06 | 8.89              | 2.55            | Slc43a1       |
| 1455785_at         | 6.99           | 3.34E-08 | 1.74E-06 | 6.63              | 1.86            | Kcna1         |
| 1441519_at         | 6.99           | 3.34E-08 | 1.74E-06 | 4.20              | 1.37            | Nid1          |
| 1439293_at         | 6.99           | 3.39E-08 | 1.76E-06 | 9.28              | 1.01            | BC031353      |
| 1455007_s_at       | 6.97           | 3.55E-08 | 1.83E-06 | 12.06             | 0.81            | Gpt2          |
| 1431158_at         | 6.97           | 3.56E-08 | 1.83E-06 | 7.47              | 1.37            | 8430406H22Rik |
| 1448234_at         | 6.97           | 3.56E-08 | 1.83E-06 | 10.56             | 1.03            | Dnajb6        |

| Probe <sup>1</sup> | t <sup>2</sup> | p-value  | q-value  | Mean <sup>3</sup> | FC <sup>4</sup> | Symbol        |
|--------------------|----------------|----------|----------|-------------------|-----------------|---------------|
| 1416418_at         | 6.97           | 3.60E-08 | 1.83E-06 | 11.41             | 1.36            | Gabarapl1     |
| 1419994_s_at       | 6.96           | 3.76E-08 | 1.91E-06 | 10.12             | 0.93            | D10Ertd641e   |
| 1433994_at         | 6.95           | 3.78E-08 | 1.91E-06 | 8.82              | 1.21            | 4931406P16Rik |
| 1435344_at         | 6.95           | 3.87E-08 | 1.94E-06 | 10.36             | 1.04            | 1110029I05Rik |
| 1448382_at         | 6.94           | 3.89E-08 | 1.94E-06 | 8.37              | 1.39            | Ehhadh        |
| 1440007_at         | 6.94           | 3.96E-08 | 1.97E-06 | 8.95              | 1.16            | Slc43a1       |
| 1439050_at         | 6.94           | 3.98E-08 | 1.97E-06 | 7.02              | 1.81            | NA            |
| 1416419_s_at       | 6.92           | 4.21E-08 | 2.08E-06 | 11.68             | 1.43            | Gabarapl1     |
| 1426607_at         | 6.90           | 4.38E-08 | 2.15E-06 | 9.63              | 0.96            | EG633640      |
| 1437100_x_at       | 6.90           | 4.43E-08 | 2.16E-06 | 10.80             | 1.24            | Pim3          |
| 1449338_at         | 6.90           | 4.44E-08 | 2.16E-06 | 10.79             | 0.82            | D10Ertd641e   |
| 1431028_a_at       | 6.90           | 4.51E-08 | 2.19E-06 | 9.27              | 1.46            | Pank1         |
| 1434976_x_at       | 6.89           | 4.53E-08 | 2.19E-06 | 11.57             | 1.42            | Eif4ebp1      |
| 1436027_at         | 6.89           | 4.59E-08 | 2.20E-06 | 9.66              | 1.16            | Osbpl11       |
| 1433725_at         | 6.89           | 4.59E-08 | 2.20E-06 | 10.17             | 0.92            | Acvr1b        |
| 1417275_at         | 6.87           | 4.87E-08 | 2.33E-06 | 6.76              | 1.76            | Mal           |
| 1456228_x_at       | 6.86           | 4.95E-08 | 2.36E-06 | 9.69              | 1.17            | Mbp           |
| 1420502_at         | 6.85           | 5.21E-08 | 2.47E-06 | 9.74              | 0.90            | Sat1          |
| 1439795_at         | 6.85           | 5.22E-08 | 2.47E-06 | 5.18              | 2.12            | Gpr64         |
| 1415996_at         | 6.84           | 5.31E-08 | 2.49E-06 | 13.88             | 0.68            | Txnip         |
| 1448306_at         | 6.84           | 5.31E-08 | 2.49E-06 | 9.19              | 1.34            | Nfkbia        |
| 1436326_at         | 6.84           | 5.34E-08 | 2.49E-06 | 10.96             | 0.92            | Rora          |
| 1415712_at         | 6.83           | 5.55E-08 | 2.57E-06 | 10.93             | 1.04            | Zranb1        |
| 1434203_at         | 6.82           | 5.58E-08 | 2.58E-06 | 4.19              | 1.59            | BC055107      |
| 1416101_a_at       | 6.82           | 5.69E-08 | 2.61E-06 | 13.05             | 0.71            | Hist1h1c      |
| 1455550_x_at       | 6.80           | 5.96E-08 | 2.73E-06 | 13.53             | 0.61            | Serinc3       |
| 1423130_a_at       | 6.80           | 5.99E-08 | 2.74E-06 | 11.25             | 0.81            | Sfrs5         |
| 1415997_at         | 6.79           | 6.22E-08 | 2.83E-06 | 12.38             | 0.86            | Txnip         |
| 1449731_s_at       | 6.79           | 6.27E-08 | 2.84E-06 | 10.34             | 1.16            | Nfkbia        |
| 1448724_at         | 6.78           | 6.30E-08 | 2.84E-06 | 4.49              | 1.68            | Cish          |
| 1438065_at         | 6.77           | 6.50E-08 | 2.92E-06 | 3.81              | 1.36            | NA            |
| 1438936_s_at       | 6.77           | 6.59E-08 | 2.95E-06 | 8.20              | 1.66            | Rnase4        |
| 1432007_s_at       | 6.76           | 6.88E-08 | 3.07E-06 | 5.78              | 1.49            | Ap2a2         |
| 1456761_at         | 6.75           | 7.01E-08 | 3.11E-06 | 5.86              | 1.46            | D630030B22Rik |
| 1434954_at         | 6.75           | 7.02E-08 | 3.11E-06 | 8.51              | 0.98            | Mpp5          |
| 1435079_at         | 6.72           | 7.61E-08 | 3.35E-06 | 9.58              | 0.88            | Sfrs18        |
| 1424838_at         | 6.71           | 7.95E-08 | 3.48E-06 | 4.12              | 1.49            | A330049M08Rik |
| 1416060_at         | 6.70           | 8.19E-08 | 3.57E-06 | 11.93             | 0.91            | Tbc1d15       |
| 1451218_at         | 6.69           | 8.37E-08 | 3.64E-06 | 8.18              | 1.51            | Edem1         |
| 1438704_at         | 6.69           | 8.48E-08 | 3.68E-06 | 14.39             | 0.74            | Trim63        |
| 1438937_x_at       | 6.68           | 8.53E-08 | 3.69E-06 | 8.03              | 1.36            | Rnase4        |
| 1450970_at         | 6.68           | 8.59E-08 | 3.69E-06 | 12.95             | 0.74            | Got1          |
| 1417563_at         | 6.68           | 8.60E-08 | 3.69E-06 | 7.30              | 2.00            | Eif4ebp1      |
| 1456386_at         | 6.68           | 8.67E-08 | 3.71E-06 | 9.30              | 0.89            | Rbm39         |
| 1417900_a_at       | 6.67           | 8.99E-08 | 3.81E-06 | 10.78             | 0.82            | Vldlr         |
| 1449335_at         | 6.67           | 9.02E-08 | 3.81E-06 | 10.29             | 0.86            | Timp3         |
| 1457264_at         | 6.66           | 9.29E-08 | 3.91E-06 | 8.33              | 1.30            | Phf2011       |
| 1433836_a_at       | 6.66           | 9.30E-08 | 3.91E-06 | 12.18             | 2.46            | 8430408G22Rik |
| 1454646_at         | 6.64           | 9.70E-08 | 4.05E-06 | 11.61             | 1.20            | Tcp11l2       |
| 1457292_at         | 6.64           | 9.70E-08 | 4.05E-06 | 7.10              | 1.39            | Josd3         |
| 1428472_at         | 6.63           | 1.02E-07 | 4.22E-06 | 5.05              | 1.73            | Spsb1         |
| 1444075_at         | 6.63           | 1.02E-07 | 4.22E-06 | 8.92              | 1.06            | Filip1        |
| 1449732_at         | 6.61           | 1.06E-07 | 4.34E-06 | 7.65              | 1.31            | Zscan21       |

| Probe <sup>1</sup> | t <sup>2</sup> | p-value  | q-value  | Mean <sup>3</sup> | FC <sup>4</sup> | Symbol        |
|--------------------|----------------|----------|----------|-------------------|-----------------|---------------|
| 1420088_at         | 6.61           | 1.07E-07 | 4.37E-06 | 11.95             | 0.99            | Nfkbia        |
| 1429177_x_at       | 6.60           | 1.10E-07 | 4.48E-06 | 8.47              | 1.15            | Sox17         |
| 1433575_at         | 6.60           | 1.11E-07 | 4.52E-06 | 9.58              | 1.30            | NA            |
| 1454651_x_at       | 6.59           | 1.13E-07 | 4.58E-06 | 8.90              | 1.26            | Mbp           |
| 1427820_at         | 6.59           | 1.14E-07 | 4.59E-06 | 5.97              | 2.22            | NA            |
| 1454617_at         | 6.59           | 1.15E-07 | 4.59E-06 | 11.76             | 1.72            | Arrdc3        |
| 1429787_x_at       | 6.59           | 1.15E-07 | 4.60E-06 | 7.75              | 1.43            | Zwint         |
| 1460417_at         | 6.59           | 1.16E-07 | 4.60E-06 | 5.97              | 1.61            | AB041803      |
| 1444811_at         | 6.58           | 1.17E-07 | 4.65E-06 | 5.26              | 1.81            | Tloc1         |
| 1457724_at         | 6.57           | 1.21E-07 | 4.78E-06 | 6.06              | 1.62            | Ctsl          |
| 1451447_at         | 6.56           | 1.26E-07 | 4.94E-06 | 8.48              | 1.65            | Cuedc1        |
| 1453136_at         | 6.54           | 1.32E-07 | 5.16E-06 | 8.67              | 1.05            | Fbxo30        |
| 1441150_x_at       | 6.54           | 1.33E-07 | 5.19E-06 | 5.65              | 1.79            | NA            |
| 1438815_at         | 6.53           | 1.39E-07 | 5.39E-06 | 4.57              | 1.43            | Hist2h2aa2    |
| 1451204_at         | 6.52           | 1.40E-07 | 5.40E-06 | 9.75              | 0.94            | Scara5        |
| 1433755_at         | 6.52           | 1.40E-07 | 5.40E-06 | 10.24             | 1.13            | Mier1         |
| 1416371_at         | 6.52           | 1.41E-07 | 5.43E-06 | 11.23             | 1.01            | Apod          |
| 1448272_at         | 6.52           | 1.42E-07 | 5.43E-06 | 7.80              | 1.99            | Btg2          |
| 1451310_a_at       | 6.51           | 1.44E-07 | 5.47E-06 | 12.62             | 0.90            | Ctsl          |
| 1457689_at         | 6.48           | 1.60E-07 | 6.04E-06 | 4.32              | 1.27            | Sbf2          |
| 1439622_at         | 6.47           | 1.63E-07 | 6.11E-06 | 6.94              | 1.67            | Rassf4        |
| 1426235_a_at       | 6.47           | 1.64E-07 | 6.13E-06 | 11.27             | 1.29            | Glul          |
| 1448758_at         | 6.45           | 1.72E-07 | 6.41E-06 | 10.88             | 0.87            | EG627232      |
| 1429236_at         | 6.45           | 1.73E-07 | 6.43E-06 | 8.30              | 1.38            | Galntl2       |
| 1453782_at         | 6.43           | 1.86E-07 | 6.84E-06 | 9.60              | 0.90            | 3021401C12Rik |
| 1448370_at         | 6.43           | 1.89E-07 | 6.89E-06 | 10.41             | 1.19            | Ulk1          |
| 1439080_at         | 6.39           | 2.08E-07 | 7.55E-06 | 5.08              | 1.48            | Erbp2ip       |
| 1424683_at         | 6.39           | 2.09E-07 | 7.56E-06 | 14.44             | 0.67            | 1810015C04Rik |
| 1448231_at         | 6.39           | 2.10E-07 | 7.59E-06 | 8.25              | 1.78            | Fkbp5         |
| 1455720_at         | 6.39           | 2.11E-07 | 7.59E-06 | 3.86              | 2.01            | Adamts2       |
| 1417416_at         | 6.38           | 2.13E-07 | 7.66E-06 | 4.75              | 1.61            | Kcna1         |
| 1433934_at         | 6.38           | 2.19E-07 | 7.83E-06 | 11.12             | 0.83            | Sec24a        |
| 1430404_at         | 6.37           | 2.26E-07 | 7.98E-06 | 4.88              | 1.50            | Akap13        |
| 1434817_s_at       | 6.35           | 2.34E-07 | 8.26E-06 | 8.75              | 1.00            | 4930535B03Rik |
| 1452798_s_at       | 6.35           | 2.35E-07 | 8.26E-06 | 9.77              | 1.08            | Mapk1ip1      |
| 1450725_s_at       | 6.35           | 2.35E-07 | 8.26E-06 | 9.56              | 0.86            | Car14         |
| 1450853_at         | 6.34           | 2.43E-07 | 8.49E-06 | 9.87              | 1.02            | Tle4          |
| 1422648_at         | 6.34           | 2.45E-07 | 8.54E-06 | 9.71              | 2.01            | Slc7a2        |
| 1416225_at         | 6.33           | 2.54E-07 | 8.83E-06 | 9.59              | 0.85            | Adh1          |
| 1439912_at         | 6.31           | 2.69E-07 | 9.34E-06 | 4.74              | 1.61            | 9430098F02Rik |
| 1422736_at         | 6.31           | 2.71E-07 | 9.35E-06 | 9.69              | 0.86            | Ranbp9        |
| 1426671_a_at       | 6.30           | 2.73E-07 | 9.38E-06 | 10.37             | 0.79            | Rbm39         |
| 1419329_at         | 6.30           | 2.77E-07 | 9.51E-06 | 7.62              | 1.37            | Sorbs3        |
| 1439638_at         | 6.30           | 2.78E-07 | 9.51E-06 | 6.66              | 1.46            | Erbp2ip       |
| 1427339_at         | 6.30           | 2.81E-07 | 9.58E-06 | 3.88              | 1.70            | Slc30a2       |
| 1422904_at         | 6.29           | 2.87E-07 | 9.75E-06 | 6.48              | 1.57            | Fmo2          |
| 1451006_at         | 6.29           | 2.88E-07 | 9.75E-06 | 9.34              | 0.93            | Xdh           |
| 1420667_at         | 6.28           | 2.98E-07 | 1.00E-05 | 3.95              | 1.38            | Doc2b         |
| 1436201_x_at       | 6.25           | 3.22E-07 | 1.08E-05 | 8.90              | 1.35            | Mbp           |
| 1436228_at         | 6.24           | 3.29E-07 | 1.10E-05 | 10.62             | 0.93            | NA            |
| 1443167_at         | 6.23           | 3.39E-07 | 1.12E-05 | 5.15              | 1.68            | Rnf12         |
| 1417133_at         | 6.23           | 3.40E-07 | 1.12E-05 | 10.20             | 0.91            | Pmp22         |
| 1424296_at         | 6.22           | 3.51E-07 | 1.15E-05 | 8.54              | 1.01            | Gclc          |

| Probe <sup>1</sup> | t <sup>2</sup> | p-value  | q-value  | Mean <sup>3</sup> | FC <sup>4</sup> | Symbol        |
|--------------------|----------------|----------|----------|-------------------|-----------------|---------------|
| 1423062_at         | 6.22           | 3.52E-07 | 1.15E-05 | 9.38              | 1.93            | Igfbp3        |
| 1445534_at         | 6.21           | 3.60E-07 | 1.18E-05 | 4.50              | 1.50            | Flnb          |
| 1436952_at         | 6.21           | 3.62E-07 | 1.18E-05 | 6.06              | 1.42            | Klf9          |
| 1427345_a_at       | 6.19           | 3.87E-07 | 1.25E-05 | 10.54             | 0.98            | Sult1a1       |
| 1450511_at         | 6.18           | 3.94E-07 | 1.27E-05 | 6.55              | 1.61            | Musk          |
| 1438714_at         | 6.18           | 3.98E-07 | 1.28E-05 | 9.83              | 0.87            | Zfp207        |
| 1430798_x_at       | 6.18           | 4.02E-07 | 1.29E-05 | 5.37              | 1.31            | Mrpl15        |
| 1433837_at         | 6.16           | 4.19E-07 | 1.34E-05 | 11.62             | 2.84            | 8430408G22Rik |
| 1439079_a_at       | 6.16           | 4.20E-07 | 1.34E-05 | 6.81              | 1.55            | Erbp2ip       |
| 1438234_at         | 6.15           | 4.37E-07 | 1.39E-05 | 7.77              | 1.14            | Wdr26         |
| 1434752_at         | 6.14           | 4.46E-07 | 1.41E-05 | 7.79              | 1.02            | LOC100043601  |
| 1449546_a_at       | 6.14           | 4.49E-07 | 1.41E-05 | 9.98              | 0.75            | Zfp617        |
| 1438350_at         | 6.14           | 4.51E-07 | 1.41E-05 | 3.74              | 1.36            | Gpr64         |
| 1437342_x_at       | 6.14           | 4.53E-07 | 1.41E-05 | 10.09             | 0.78            | Pttglip       |
| 1418715_at         | 6.14           | 4.55E-07 | 1.42E-05 | 11.00             | 1.21            | Pank1         |
| 1448026_at         | 6.13           | 4.62E-07 | 1.44E-05 | 6.65              | 1.30            | NA            |
| 1415826_at         | 6.12           | 4.79E-07 | 1.48E-05 | 9.29              | 0.95            | Atp6v1h       |
| 1433761_at         | 6.12           | 4.82E-07 | 1.49E-05 | 8.76              | 1.44            | Pde4dip       |
| 1451743_at         | 6.12           | 4.82E-07 | 1.49E-05 | 7.14              | 1.31            | D19Wsu162e    |
| 1433633_at         | 6.11           | 4.91E-07 | 1.51E-05 | 7.23              | 1.24            | Irf2bp2       |
| 1433532_a_at       | 6.11           | 4.95E-07 | 1.52E-05 | 11.33             | 1.03            | Mbp           |
| 1452997_at         | 6.11           | 5.03E-07 | 1.54E-05 | 9.16              | 0.89            | 6820431F20Rik |
| 1434100_x_at       | 6.09           | 5.27E-07 | 1.60E-05 | 9.76              | 1.17            | Ppargc1a      |
| 1422751_at         | 6.09           | 5.29E-07 | 1.60E-05 | 7.13              | 1.44            | Tle1          |
| 1417623_at         | 6.08           | 5.48E-07 | 1.65E-05 | 9.48              | 0.94            | Slc12a2       |
| 1452708_a_at       | 6.07           | 5.56E-07 | 1.67E-05 | 7.70              | 1.23            | Luc7l         |
| 1415930_a_at       | 6.07           | 5.56E-07 | 1.67E-05 | 13.07             | 0.55            | Map1lc3b      |
| 1420376_a_at       | 6.07           | 5.62E-07 | 1.68E-05 | 11.51             | 0.72            | H3f3b         |
| 1438542_at         | 6.07           | 5.65E-07 | 1.69E-05 | 3.53              | 1.05            | Trp53         |
| 1455010_at         | 6.06           | 5.70E-07 | 1.70E-05 | 9.47              | 0.82            | 1500012F01Rik |
| 1443400_at         | 6.06           | 5.86E-07 | 1.73E-05 | 5.00              | 1.42            | Mier1         |
| 1424942_a_at       | 6.05           | 5.87E-07 | 1.73E-05 | 5.71              | 1.86            | Myc           |
| 1438157_s_at       | 6.05           | 5.88E-07 | 1.73E-05 | 11.39             | 0.94            | Nfkbia        |
| 1420870_at         | 6.05           | 5.89E-07 | 1.73E-05 | 8.76              | 0.88            | Mllt10        |
| 1451156_s_at       | 6.05           | 6.02E-07 | 1.76E-05 | 7.99              | 1.11            | Vldlr         |
| 1419040_at         | 6.04           | 6.10E-07 | 1.78E-05 | 6.62              | 1.45            | Cyp2d22       |
| 1417290_at         | 6.03           | 6.26E-07 | 1.82E-05 | 8.62              | 0.90            | Lrg1          |
| 1442258_at         | 6.03           | 6.27E-07 | 1.82E-05 | 4.16              | 1.31            | NA            |
| 1449893_a_at       | 6.03           | 6.28E-07 | 1.82E-05 | 9.86              | 0.93            | Lrig1         |
| 1442014_at         | 6.02           | 6.56E-07 | 1.90E-05 | 7.13              | 1.32            | Ifrd1         |
| 1429657_at         | 6.01           | 6.75E-07 | 1.95E-05 | 6.11              | 1.41            | Zfand5        |
| 1427742_a_at       | 6.01           | 6.76E-07 | 1.95E-05 | 9.09              | 1.03            | Klf6          |
| 1429537_at         | 6.01           | 6.76E-07 | 1.95E-05 | 8.17              | 1.19            | Sfrs18        |
| 1428467_at         | 6.00           | 6.91E-07 | 1.98E-05 | 8.08              | 1.06            | Tardbp        |
| 1423153_x_at       | 6.00           | 7.02E-07 | 2.01E-05 | 9.22              | 0.88            | Cfh           |
| 1457058_at         | 5.98           | 7.35E-07 | 2.10E-05 | 6.84              | 1.46            | Adamts2       |
| 1449102_at         | 5.98           | 7.36E-07 | 2.10E-05 | 6.72              | 1.27            | Ebf2          |
| 1448793_a_at       | 5.98           | 7.40E-07 | 2.10E-05 | 5.74              | 1.38            | Sdc4          |
| 1451601_a_at       | 5.98           | 7.49E-07 | 2.12E-05 | 10.03             | 1.22            | Spns2         |
| 1419089_at         | 5.97           | 7.51E-07 | 2.13E-05 | 9.20              | 0.95            | Timp3         |
| 1426011_a_at       | 5.96           | 7.83E-07 | 2.20E-05 | 10.36             | 0.79            | Ggnbp2        |
| 1416856_at         | 5.95           | 8.00E-07 | 2.25E-05 | 11.13             | 0.81            | 3230401D17Rik |
| 1435026_at         | 5.95           | 8.03E-07 | 2.25E-05 | 4.77              | 1.24            | Spock2        |

| Probe <sup>1</sup> | t <sup>2</sup> | p-value  | q-value  | Mean <sup>3</sup> | FC <sup>4</sup> | Symbol        |
|--------------------|----------------|----------|----------|-------------------|-----------------|---------------|
| 1435524_at         | 5.95           | 8.05E-07 | 2.25E-05 | 10.25             | 0.72            | 2010109N14Rik |
| 1417158_at         | 5.95           | 8.12E-07 | 2.27E-05 | 5.24              | 1.25            | Zxdc          |
| 1451737_at         | 5.95           | 8.15E-07 | 2.27E-05 | 4.96              | 1.39            | Pik3r1        |
| 1416504_at         | 5.94           | 8.29E-07 | 2.30E-05 | 7.30              | 1.61            | Ulk1          |
| 1454670_at         | 5.94           | 8.32E-07 | 2.30E-05 | 9.66              | 0.81            | Rere          |
| 1438186_at         | 5.93           | 8.58E-07 | 2.36E-05 | 10.43             | 0.91            | Pdlim5        |
| 1416721_s_at       | 5.93           | 8.65E-07 | 2.37E-05 | 10.50             | 0.76            | Sfrs6         |
| 1445866_at         | 5.93           | 8.73E-07 | 2.39E-05 | 5.05              | 1.37            | Mast4         |
| 1417611_at         | 5.92           | 9.01E-07 | 2.46E-05 | 6.40              | 1.59            | Tmem37        |
| 1420249_s_at       | 5.91           | 9.07E-07 | 2.47E-05 | 8.35              | 1.86            | Ccl6          |
| 1420658_at         | 5.91           | 9.16E-07 | 2.48E-05 | 10.87             | 0.90            | Ucp3          |
| 1452145_at         | 5.91           | 9.16E-07 | 2.48E-05 | 9.14              | 1.27            | H6pd          |
| 1419144_at         | 5.91           | 9.25E-07 | 2.50E-05 | 9.47              | 1.11            | Cd163         |
| 1418697_at         | 5.90           | 9.44E-07 | 2.55E-05 | 10.69             | 1.33            | Inmt          |
| 1449901_a_at       | 5.90           | 9.47E-07 | 2.55E-05 | 3.89              | 1.35            | Map3k6        |
| 1433593_at         | 5.89           | 9.67E-07 | 2.59E-05 | 7.77              | 1.33            | Ypel5         |
| 1427470_s_at       | 5.89           | 9.69E-07 | 2.59E-05 | 5.89              | 1.42            | Napb          |
| 1444559_at         | 5.89           | 9.79E-07 | 2.61E-05 | 5.92              | 1.47            | Phtf2         |
| 1434043_a_at       | 5.87           | 1.02E-06 | 2.72E-05 | 9.51              | 0.81            | Repin1        |
| 1421267_a_at       | 5.87           | 1.04E-06 | 2.75E-05 | 9.72              | 1.22            | Cited2        |
| 1436968_x_at       | 5.87           | 1.04E-06 | 2.75E-05 | 10.77             | 0.70            | Klhl24        |
| 1451382_at         | 5.87           | 1.04E-06 | 2.76E-05 | 11.20             | 1.18            | Chac1         |
| 1449356_at         | 5.87           | 1.04E-06 | 2.76E-05 | 13.74             | 0.47            | Asb5          |
| 1447896_s_at       | 5.87           | 1.05E-06 | 2.76E-05 | 11.03             | 0.77            | 2010109N14Rik |
| 1439200_x_at       | 5.86           | 1.05E-06 | 2.77E-05 | 8.98              | 1.21            | Erdr1         |
| 1434210_s_at       | 5.86           | 1.07E-06 | 2.79E-05 | 9.70              | 0.88            | Lrig1         |
| 1417815_a_at       | 5.86           | 1.08E-06 | 2.81E-05 | 12.63             | 0.64            | Serinc3       |
| 1440818_s_at       | 5.85           | 1.09E-06 | 2.84E-05 | 11.49             | 0.66            | Sf3b1         |
| 1425099_a_at       | 5.85           | 1.09E-06 | 2.84E-05 | 9.25              | 1.37            | Arntl         |
| 1421037_at         | 5.85           | 1.11E-06 | 2.88E-05 | 4.05              | 1.34            | Npas2         |
| 1441326_at         | 5.85           | 1.11E-06 | 2.89E-05 | 4.37              | 1.21            | Cp            |
| 1426791_at         | 5.84           | 1.14E-06 | 2.93E-05 | 6.41              | 1.70            | Rusc2         |
| 1458947_at         | 5.84           | 1.14E-06 | 2.93E-05 | 5.40              | 1.26            | 2010111I01Rik |
| 1447815_x_at       | 5.84           | 1.14E-06 | 2.93E-05 | 3.67              | 1.23            | 6430527G18Rik |
| 1453137_at         | 5.83           | 1.16E-06 | 2.99E-05 | 8.17              | 1.11            | Fbxo30        |
| 1416085_s_at       | 5.83           | 1.17E-06 | 2.99E-05 | 13.87             | 0.53            | Zfand5        |
| 1428352_at         | 5.83           | 1.17E-06 | 2.99E-05 | 10.49             | 1.01            | Arrdc2        |
| 1429351_at         | 5.83           | 1.18E-06 | 3.02E-05 | 11.27             | 0.77            | Klhl24        |
| 1456295_at         | 5.83           | 1.19E-06 | 3.02E-05 | 8.21              | 1.25            | B230114P17Rik |
| 1446673_at         | 5.82           | 1.20E-06 | 3.04E-05 | 7.54              | 1.05            | D330013E07Rik |
| 1433530_at         | 5.82           | 1.22E-06 | 3.09E-05 | 4.41              | 1.27            | Rpl41         |
| 1452207_at         | 5.82           | 1.22E-06 | 3.09E-05 | 11.73             | 1.10            | Cited2        |
| 1440896_at         | 5.82           | 1.23E-06 | 3.10E-05 | 4.41              | 1.25            | Sfrs15        |
| 1416129_at         | 5.81           | 1.24E-06 | 3.12E-05 | 9.98              | 1.30            | Errfi1        |
| 1423396_at         | 5.81           | 1.25E-06 | 3.14E-05 | 6.73              | 1.36            | Agt           |
| 1456790_at         | 5.81           | 1.26E-06 | 3.17E-05 | 6.09              | 1.31            | Zfp800        |
| 1460192_at         | 5.80           | 1.28E-06 | 3.19E-05 | 11.03             | 0.84            | Osbpl1a       |
| 1438796_at         | 5.80           | 1.29E-06 | 3.21E-05 | 7.39              | 2.45            | Nr4a3         |
| 1460020_at         | 5.80           | 1.29E-06 | 3.21E-05 | 5.37              | 1.72            | Ankrd11       |
| 1449528_at         | 5.79           | 1.32E-06 | 3.26E-05 | 7.03              | 1.45            | Figf          |
| 1451718_at         | 5.79           | 1.33E-06 | 3.28E-05 | 8.65              | 0.95            | Plp1          |
| 1453332_at         | 5.79           | 1.34E-06 | 3.29E-05 | 7.59              | 1.16            | 2410002O22Rik |
| 1437666_x_at       | 5.79           | 1.35E-06 | 3.30E-05 | 14.57             | 0.54            | Ubc           |



| Probe <sup>1</sup> | t <sup>2</sup> | p-value  | q-value  | Mean <sup>3</sup> | FC <sup>4</sup> | Symbol        |
|--------------------|----------------|----------|----------|-------------------|-----------------|---------------|
| 1420657_at         | 5.78           | 1.35E-06 | 3.31E-05 | 11.10             | 0.95            | Ucp3          |
| 1453022_at         | 5.78           | 1.36E-06 | 3.31E-05 | 9.47              | 0.79            | Gpihbp1       |
| 1424632_a_at       | 5.78           | 1.37E-06 | 3.33E-05 | 10.44             | 0.71            | Rev3l         |
| 1448780_at         | 5.78           | 1.37E-06 | 3.33E-05 | 9.06              | 1.00            | Slc12a2       |
| 1418014_a_at       | 5.77           | 1.41E-06 | 3.40E-05 | 8.90              | 0.91            | B4galt1       |
| 1424872_at         | 5.77           | 1.41E-06 | 3.40E-05 | 8.81              | 1.08            | 2310001H12Rik |
| 1428996_at         | 5.77           | 1.43E-06 | 3.43E-05 | 5.13              | 1.46            | 4833426J09Rik |
| 1437110_at         | 5.76           | 1.47E-06 | 3.52E-05 | 8.95              | 0.89            | 2810474O19Rik |
| 1455437_at         | 5.75           | 1.50E-06 | 3.59E-05 | 9.99              | 0.77            | 9030204A07Rik |
| 1457451_at         | 5.75           | 1.51E-06 | 3.59E-05 | 3.98              | 1.03            | Acvr2a        |
| 1437717_x_at       | 5.75           | 1.52E-06 | 3.62E-05 | 8.21              | 1.11            | 6820431F20Rik |
| 1455534_s_at       | 5.75           | 1.52E-06 | 3.62E-05 | 9.81              | 0.94            | Osbpl11       |
| 1416332_at         | 5.74           | 1.54E-06 | 3.66E-05 | 8.54              | 0.92            | Cirbp         |
| 1434099_at         | 5.74           | 1.55E-06 | 3.66E-05 | 9.69              | 1.13            | Ppargc1a      |
| 1422560_at         | 5.74           | 1.55E-06 | 3.66E-05 | 9.70              | 1.45            | Rsc1a1        |
| 1431060_at         | 5.74           | 1.56E-06 | 3.68E-05 | 5.33              | 1.40            | Peli1         |
| 1459971_at         | 5.73           | 1.58E-06 | 3.72E-05 | 4.17              | 1.32            | Kcnt2         |
| 1419674_a_at       | 5.72           | 1.65E-06 | 3.86E-05 | 8.12              | 1.28            | Dpep1         |
| 1447898_s_at       | 5.72           | 1.65E-06 | 3.86E-05 | 10.25             | 0.69            | Sfrs6         |
| 1460547_a_at       | 5.72           | 1.66E-06 | 3.86E-05 | 13.28             | 0.43            | Hnrpk         |
| 1436555_at         | 5.71           | 1.69E-06 | 3.93E-05 | 10.46             | 1.69            | Slc7a2        |
| 1452348_s_at       | 5.71           | 1.71E-06 | 3.97E-05 | 9.28              | 0.96            | Ifi205        |
| 1454795_at         | 5.70           | 1.73E-06 | 3.99E-05 | 9.41              | 0.93            | Cobll1        |
| 1425809_at         | 5.70           | 1.74E-06 | 4.01E-05 | 6.74              | 1.36            | Fabp4         |
| 1444649_at         | 5.70           | 1.75E-06 | 4.02E-05 | 4.63              | 1.83            | Prkce         |
| 1421907_at         | 5.70           | 1.75E-06 | 4.02E-05 | 8.48              | 1.37            | Med1          |
| 1424776_a_at       | 5.70           | 1.75E-06 | 4.02E-05 | 9.42              | 0.85            | Slc25a28      |
| 1438397_a_at       | 5.69           | 1.79E-06 | 4.10E-05 | 7.72              | 1.10            | Rbm39         |
| 1437924_at         | 5.69           | 1.82E-06 | 4.17E-05 | 8.06              | 1.11            | Son           |
| 1440511_at         | 5.68           | 1.85E-06 | 4.23E-05 | 9.27              | 0.80            | NA            |
| 1430370_at         | 5.68           | 1.88E-06 | 4.29E-05 | 6.61              | 1.26            | Eprs          |
| 1427334_s_at       | 5.67           | 1.90E-06 | 4.31E-05 | 7.30              | 1.15            | 2810474O19Rik |
| 1449138_at         | 5.67           | 1.92E-06 | 4.35E-05 | 11.78             | 0.65            | Sf3b1         |
| 1419874_x_at       | 5.65           | 2.02E-06 | 4.56E-05 | 10.43             | 0.91            | Zbtb16        |
| 1429900_at         | 5.64           | 2.07E-06 | 4.68E-05 | 9.44              | 1.05            | 5330406M23Rik |
| 1426383_at         | 5.64           | 2.08E-06 | 4.68E-05 | 9.74              | 0.86            | Cry2          |
| 1417561_at         | 5.63           | 2.14E-06 | 4.79E-05 | 4.96              | 1.87            | Apoc1         |
| 1452444_at         | 5.63           | 2.18E-06 | 4.87E-05 | 4.83              | 1.42            | Napb          |
| 1441915_s_at       | 5.63           | 2.20E-06 | 4.91E-05 | 10.95             | 0.84            | 2310076L09Rik |
| 1435458_at         | 5.62           | 2.22E-06 | 4.95E-05 | 8.36              | 1.29            | Pim1          |
| 1454817_at         | 5.62           | 2.26E-06 | 5.03E-05 | 6.84              | 1.32            | Utp18         |
| 1424141_at         | 5.61           | 2.28E-06 | 5.06E-05 | 11.83             | 0.80            | Hectd1        |
| 1450888_at         | 5.61           | 2.29E-06 | 5.06E-05 | 6.97              | 1.33            | Napb          |
| 1451577_at         | 5.61           | 2.31E-06 | 5.11E-05 | 9.67              | 0.77            | Zbtb20        |
| 1446269_at         | 5.60           | 2.35E-06 | 5.19E-05 | 4.16              | 1.31            | Hbp1          |
| 1427305_at         | 5.60           | 2.38E-06 | 5.25E-05 | 6.23              | 1.34            | Piga          |
| 1418280_at         | 5.60           | 2.41E-06 | 5.30E-05 | 7.31              | 1.40            | Klf6          |
| 1452433_at         | 5.59           | 2.43E-06 | 5.32E-05 | 7.92              | 2.00            | NA            |
| 1442277_at         | 5.59           | 2.43E-06 | 5.32E-05 | 3.70              | 1.24            | Chka          |
| 1450876_at         | 5.58           | 2.53E-06 | 5.53E-05 | 9.28              | 0.83            | Cfh           |
| 1427471_at         | 5.58           | 2.56E-06 | 5.57E-05 | 8.95              | 0.85            | Fbxl3         |
| 1434933_at         | 5.58           | 2.56E-06 | 5.57E-05 | 9.01              | 0.84            | Rc3h1         |
| 1454018_at         | 5.57           | 2.59E-06 | 5.63E-05 | 7.15              | 1.34            | Tlk2          |

| Probe <sup>1</sup> | t <sup>2</sup> | p-value  | q-value  | Mean <sup>3</sup> | FC <sup>4</sup> | Symbol        |
|--------------------|----------------|----------|----------|-------------------|-----------------|---------------|
| 1416061_at         | 5.57           | 2.61E-06 | 5.64E-05 | 9.99              | 0.83            | Tbc1d15       |
| 1437423_a_at       | 5.56           | 2.70E-06 | 5.82E-05 | 10.22             | 0.63            | Sra1          |
| 1452125_at         | 5.56           | 2.73E-06 | 5.88E-05 | 8.54              | 0.93            | Thrap3        |
| 1433832_at         | 5.55           | 2.78E-06 | 5.97E-05 | 10.54             | 0.74            | Unc84b        |
| 1420772_a_at       | 5.55           | 2.81E-06 | 6.01E-05 | 12.41             | 0.77            | Tsc22d3       |
| 1433656_a_at       | 5.54           | 2.83E-06 | 6.06E-05 | 10.57             | 0.73            | Gnl3          |
| 1436506_a_at       | 5.54           | 2.85E-06 | 6.08E-05 | 11.12             | 0.65            | Snhg6         |
| 1443500_at         | 5.52           | 3.00E-06 | 6.39E-05 | 6.38              | 1.36            | Mllt10        |
| 1428172_at         | 5.52           | 3.01E-06 | 6.39E-05 | 9.12              | 0.83            | Prpf39        |
| 1438131_at         | 5.51           | 3.10E-06 | 6.55E-05 | 6.58              | 1.25            | Fbxw2         |
| 1425023_at         | 5.51           | 3.16E-06 | 6.65E-05 | 7.71              | 1.19            | Usp3          |
| 1428579_at         | 5.51           | 3.18E-06 | 6.69E-05 | 8.68              | 0.90            | Fmn12         |
| 1437953_at         | 5.50           | 3.25E-06 | 6.81E-05 | 5.43              | 1.33            | Prei4         |
| 1435229_at         | 5.49           | 3.29E-06 | 6.87E-05 | 4.42              | 1.09            | Gramd1b       |
| 1453068_at         | 5.49           | 3.31E-06 | 6.90E-05 | 7.54              | 1.15            | Prdm2         |
| 1430412_at         | 5.49           | 3.33E-06 | 6.92E-05 | 4.07              | 1.05            | 2310068C19Rik |
| 1438368_a_at       | 5.49           | 3.36E-06 | 6.95E-05 | 11.23             | 0.69            | Matr3         |
| 1437868_at         | 5.48           | 3.41E-06 | 7.05E-05 | 6.57              | 1.39            | BC023892      |
| 1438089_a_at       | 5.48           | 3.45E-06 | 7.10E-05 | 9.82              | 0.73            | Bclaf1        |
| 1428341_at         | 5.48           | 3.45E-06 | 7.10E-05 | 9.49              | 0.84            | Zfp655        |
| 1415928_a_at       | 5.47           | 3.52E-06 | 7.23E-05 | 13.77             | 0.45            | Map1lc3b      |
| 1455878_at         | 5.47           | 3.58E-06 | 7.33E-05 | 4.40              | 1.29            | 2700023E23Rik |
| 1423724_at         | 5.47           | 3.59E-06 | 7.35E-05 | 10.16             | 0.73            | Zwint         |
| 1425137_a_at       | 5.46           | 3.67E-06 | 7.49E-05 | 5.99              | 1.87            | H2-Q10        |
| 1421321_a_at       | 5.45           | 3.74E-06 | 7.58E-05 | 9.30              | 1.13            | Net1          |
| 1460643_at         | 5.45           | 3.82E-06 | 7.74E-05 | 5.51              | 1.28            | Ell           |
| 1458523_at         | 5.43           | 3.96E-06 | 8.01E-05 | 3.59              | 0.88            | Zfml          |
| 1429399_at         | 5.43           | 4.01E-06 | 8.09E-05 | 7.06              | 1.61            | Rnf125        |
| 1433508_at         | 5.43           | 4.01E-06 | 8.09E-05 | 9.59              | 0.79            | Klf6          |
| 1416720_at         | 5.42           | 4.15E-06 | 8.35E-05 | 9.83              | 0.66            | Sfrs6         |
| 1437479_x_at       | 5.41           | 4.24E-06 | 8.49E-05 | 5.21              | 1.14            | Tbx3          |
| 1448135_at         | 5.41           | 4.27E-06 | 8.53E-05 | 11.16             | 0.66            | Atf4          |
| 1418616_at         | 5.41           | 4.28E-06 | 8.53E-05 | 8.74              | 1.01            | Mafk          |
| 1424400_a_at       | 5.40           | 4.34E-06 | 8.62E-05 | 6.59              | 1.23            | Aldh1l1       |
| 1426940_at         | 5.40           | 4.39E-06 | 8.67E-05 | 8.37              | 0.92            | Sidt2         |
| 1443471_at         | 5.40           | 4.39E-06 | 8.67E-05 | 8.23              | 1.05            | Zbtb20        |
| 1417499_at         | 5.40           | 4.39E-06 | 8.67E-05 | 10.54             | 0.74            | Timm10        |
| 1447123_at         | 5.40           | 4.46E-06 | 8.76E-05 | 3.30              | 1.07            | NA            |
| 1419879_s_at       | 5.39           | 4.58E-06 | 8.98E-05 | 8.76              | 0.90            | Trim25        |
| 1453512_at         | 5.39           | 4.59E-06 | 8.98E-05 | 6.14              | 1.42            | 5830407P18Rik |
| 1434773_a_at       | 5.38           | 4.63E-06 | 9.05E-05 | 9.94              | 0.83            | Slc2a1        |
| 1456199_x_at       | 5.38           | 4.69E-06 | 9.11E-05 | 11.02             | 0.80            | Ranbp9        |
| 1416799_at         | 5.38           | 4.74E-06 | 9.20E-05 | 10.49             | 0.68            | Trpm7         |
| 1451171_at         | 5.37           | 4.87E-06 | 9.42E-05 | 3.95              | 1.06            | 2310008H04Rik |
| 1418180_at         | 5.37           | 4.87E-06 | 9.42E-05 | 9.02              | 0.86            | Sp1           |
| 1434756_at         | 5.36           | 5.03E-06 | 9.69E-05 | 9.90              | 0.78            | 5430421B17    |
| 1419816_s_at       | 5.36           | 5.05E-06 | 9.72E-05 | 8.25              | 1.46            | Errfi1        |
| 1426915_at         | 5.35           | 5.10E-06 | 9.79E-05 | 7.60              | 1.69            | Dapk1         |
| 1418936_at         | 5.35           | 5.16E-06 | 9.90E-05 | 5.33              | 1.48            | Maff          |
| 1457438_at         | 5.34           | 5.26E-06 | 0.00010  | 4.86              | 1.16            | NA            |
| 1451612_at         | 5.34           | 5.27E-06 | 0.00010  | 4.47              | 2.15            | Mt1           |
| 1453688_at         | 5.34           | 5.27E-06 | 0.00010  | 5.65              | 1.33            | Cwf19l2       |
| 1459981_s_at       | 5.34           | 5.29E-06 | 0.00010  | 8.61              | 0.85            | Rsb1          |

| Probe <sup>1</sup> | t <sup>2</sup> | p-value  | q-value | Mean <sup>3</sup> | FC <sup>4</sup> | Symbol        |
|--------------------|----------------|----------|---------|-------------------|-----------------|---------------|
| 1455506_at         | 5.33           | 5.42E-06 | 0.00010 | 8.44              | 1.18            | Slc25a34      |
| 1451361_a_at       | 5.32           | 5.56E-06 | 0.00010 | 9.75              | 0.83            | Pnpla7        |
| 1438076_at         | 5.32           | 5.57E-06 | 0.00010 | 4.44              | 1.02            | Rpl30         |
| 1417600_at         | 5.32           | 5.58E-06 | 0.00011 | 7.07              | 2.49            | Slc15a2       |
| 1454609_x_at       | 5.32           | 5.67E-06 | 0.00011 | 8.96              | 0.77            | 6430527G18Rik |
| 1435950_at         | 5.31           | 5.85E-06 | 0.00011 | 6.71              | 1.43            | Hr            |
| 1448471_a_at       | 5.30           | 5.94E-06 | 0.00011 | 9.01              | 0.79            | Ctla2a        |
| 1438953_at         | 5.30           | 6.00E-06 | 0.00011 | 7.39              | 1.44            | Figf          |
| 1454665_at         | 5.29           | 6.19E-06 | 0.00012 | 4.88              | 1.36            | Irf2bp2       |
| 1433957_at         | 5.28           | 6.28E-06 | 0.00012 | 8.81              | 0.76            | C030048B08Rik |
| 1418288_at         | 5.28           | 6.34E-06 | 0.00012 | 12.98             | 0.73            | Lpin1         |
| 1417522_at         | 5.28           | 6.35E-06 | 0.00012 | 12.78             | 1.29            | Fbxo32        |
| 1441081_a_at       | 5.27           | 6.52E-06 | 0.00012 | 7.88              | 1.01            | 1110038B12Rik |
| 1440850_at         | 5.27           | 6.66E-06 | 0.00012 | 4.05              | 1.18            | Rnf12         |
| 1429777_at         | 5.26           | 6.68E-06 | 0.00012 | 3.62              | 0.91            | Dnajb6        |
| 1439922_at         | 5.25           | 6.95E-06 | 0.00013 | 3.47              | 0.96            | Prrc1         |
| 1436898_at         | 5.25           | 7.05E-06 | 0.00013 | 9.23              | 1.01            | Sfpq          |
| 1424607_a_at       | 5.24           | 7.13E-06 | 0.00013 | 10.88             | 0.87            | LOC545174     |
| 1453238_s_at       | 5.24           | 7.15E-06 | 0.00013 | 11.53             | 1.21            | 1200016E24Rik |
| 1426516_a_at       | 5.23           | 7.32E-06 | 0.00013 | 13.06             | 0.72            | Lpin1         |
| 1452387_a_at       | 5.23           | 7.43E-06 | 0.00013 | 8.36              | 0.92            | Amotl2        |
| 1424354_at         | 5.23           | 7.52E-06 | 0.00014 | 11.61             | 1.27            | Tmem140       |
| 1455725_a_at       | 5.23           | 7.54E-06 | 0.00014 | 11.51             | 0.62            | H3f3b         |
| 1455980_a_at       | 5.22           | 7.66E-06 | 0.00014 | 6.09              | 1.46            | Gas2l3        |
| 1455696_a_at       | 5.21           | 7.78E-06 | 0.00014 | 9.78              | 0.72            | Prpf4b        |
| 1419653_a_at       | 5.21           | 7.82E-06 | 0.00014 | 12.83             | 0.46            | Ddx5          |
| 1436875_at         | 5.21           | 7.89E-06 | 0.00014 | 6.08              | 1.39            | Dnm3          |
| 1416144_a_at       | 5.21           | 7.93E-06 | 0.00014 | 11.80             | 0.55            | Dhx15         |
| 1450606_at         | 5.21           | 7.95E-06 | 0.00014 | 3.31              | 1.72            | Pnmt          |
| 1434831_a_at       | 5.21           | 7.98E-06 | 0.00014 | 9.59              | 0.78            | Foxo3a        |
| 1457262_at         | 5.21           | 7.99E-06 | 0.00014 | 7.22              | 1.33            | 2610207I05Rik |
| 1420982_at         | 5.20           | 8.03E-06 | 0.00014 | 7.78              | 0.95            | Rbm39         |
| 1418595_at         | 5.20           | 8.14E-06 | 0.00014 | 12.34             | 0.88            | S3-12         |
| 1441799_at         | 5.19           | 8.31E-06 | 0.00015 | 4.48              | 1.25            | 6030422H21Rik |
| 1420869_at         | 5.19           | 8.32E-06 | 0.00015 | 4.49              | 1.15            | Mllt10        |
| 1417496_at         | 5.19           | 8.33E-06 | 0.00015 | 8.91              | 0.93            | Cp            |
| 1426900_at         | 5.19           | 8.34E-06 | 0.00015 | 10.34             | 0.63            | Jmjd1c        |
| 1417191_at         | 5.19           | 8.35E-06 | 0.00015 | 12.08             | 0.58            | Dnajb9        |
| 1455092_at         | 5.19           | 8.36E-06 | 0.00015 | 4.95              | 1.06            | LOC100043601  |
| 1428844_a_at       | 5.19           | 8.40E-06 | 0.00015 | 9.27              | 0.72            | Bclaf1        |
| 1417209_at         | 5.18           | 8.68E-06 | 0.00015 | 8.61              | 0.86            | Sertad2       |
| 1454826_at         | 5.18           | 8.76E-06 | 0.00015 | 10.30             | 0.70            | Zbtb11        |
| 1451316_a_at       | 5.17           | 8.84E-06 | 0.00015 | 11.68             | 0.66            | Picalm        |
| 1416823_a_at       | 5.17           | 8.87E-06 | 0.00015 | 8.25              | 1.08            | Osbpl1a       |
| 1435357_at         | 5.16           | 9.10E-06 | 0.00016 | 8.75              | 1.13            | D4Wsu53e      |
| 1435137_s_at       | 5.16           | 9.21E-06 | 0.00016 | 10.66             | 1.16            | 1200016E24Rik |
| 1422886_a_at       | 5.16           | 9.26E-06 | 0.00016 | 9.24              | 0.73            | Clk4          |
| 1433468_at         | 5.15           | 9.36E-06 | 0.00016 | 6.06              | 1.13            | 6430527G18Rik |
| 1456390_at         | 5.15           | 9.36E-06 | 0.00016 | 10.11             | 0.67            | Ppp2ca        |
| 1439537_at         | 5.15           | 9.38E-06 | 0.00016 | 9.39              | 1.11            | NA            |
| 1425981_a_at       | 5.15           | 9.44E-06 | 0.00016 | 10.82             | 0.74            | Rbl2          |
| 1434033_at         | 5.15           | 9.47E-06 | 0.00016 | 7.51              | 1.10            | Tle1          |
| 1420131_s_at       | 5.15           | 9.49E-06 | 0.00016 | 10.75             | 0.65            | Pttg1ip       |

| Probe <sup>1</sup> | t <sup>2</sup> | p-value  | q-value | Mean <sup>3</sup> | FC <sup>4</sup> | Symbol        |
|--------------------|----------------|----------|---------|-------------------|-----------------|---------------|
| 1427672_a_at       | 5.15           | 9.53E-06 | 0.00016 | 9.13              | 0.76            | Utx           |
| 1438972_x_at       | 5.15           | 9.60E-06 | 0.00016 | 7.15              | 1.12            | LOC100042332  |
| 1415929_at         | 5.14           | 9.66E-06 | 0.00016 | 11.96             | 0.58            | Map1lc3b      |
| 1428976_at         | 5.14           | 9.69E-06 | 0.00016 | 7.29              | 1.09            | Tmpo          |
| 1426008_a_at       | 5.14           | 9.70E-06 | 0.00016 | 8.40              | 2.00            | Slc7a2        |
| 1433983_at         | 5.14           | 9.82E-06 | 0.00017 | 7.48              | 1.15            | Cnksr3        |
| 1430969_at         | 5.14           | 9.93E-06 | 0.00017 | 3.60              | 0.97            | Mtch2         |
| 1454793_x_at       | 5.13           | 1.02E-05 | 0.00017 | 12.21             | 0.54            | Ddx5          |
| 1428010_at         | 5.12           | 1.04E-05 | 0.00017 | 5.61              | 1.09            | Timm9         |
| 1419156_at         | 5.11           | 1.07E-05 | 0.00018 | 3.66              | 1.04            | Sox4          |
| 1423253_at         | 5.11           | 1.07E-05 | 0.00018 | 6.66              | 1.35            | Mpz           |
| 1424050_s_at       | 5.11           | 1.08E-05 | 0.00018 | 9.62              | 0.69            | Fgfr1         |
| 1435740_at         | 5.11           | 1.09E-05 | 0.00018 | 9.59              | 0.66            | NA            |
| 1430646_at         | 5.10           | 1.10E-05 | 0.00018 | 4.62              | 1.11            | 5830407P18Rik |
| 1450113_at         | 5.10           | 1.12E-05 | 0.00018 | 9.21              | 0.71            | NA            |
| 1428024_at         | 5.10           | 1.12E-05 | 0.00018 | 3.87              | 1.11            | Map1lc3b      |
| 1424932_at         | 5.09           | 1.12E-05 | 0.00019 | 7.48              | 1.10            | Egfr          |
| 1429588_at         | 5.09           | 1.14E-05 | 0.00019 | 8.00              | 0.93            | 2810474O19Rik |
| 1416998_at         | 5.09           | 1.14E-05 | 0.00019 | 10.05             | 0.78            | Rrs1          |
| 1436994_a_at       | 5.09           | 1.16E-05 | 0.00019 | 13.77             | 0.56            | Hist1h1c      |
| 1433632_at         | 5.08           | 1.16E-05 | 0.00019 | 8.46              | 0.87            | Irf2bp2       |
| 1434774_at         | 5.08           | 1.16E-05 | 0.00019 | 4.92              | 1.17            | Rhbdf2        |
| 1439095_at         | 5.07           | 1.19E-05 | 0.00019 | 4.80              | 1.39            | Sfrs11        |
| 1418562_at         | 5.07           | 1.20E-05 | 0.00020 | 11.12             | 0.63            | Sf3b1         |
| 1435658_at         | 5.07           | 1.21E-05 | 0.00020 | 8.50              | 0.86            | Slc27a1       |
| 1434355_at         | 5.07           | 1.21E-05 | 0.00020 | 9.33              | 0.68            | Zfp617        |
| 1439010_at         | 5.06           | 1.24E-05 | 0.00020 | 9.94              | 0.68            | Larp4         |
| 1450098_at         | 5.06           | 1.24E-05 | 0.00020 | 4.26              | 1.14            | 0610010D20Rik |
| 1452264_at         | 5.06           | 1.24E-05 | 0.00020 | 7.96              | 0.97            | Tenc1         |
| 1417001_a_at       | 5.06           | 1.25E-05 | 0.00020 | 12.09             | 0.79            | D4Wsu53e      |
| 1429538_a_at       | 5.06           | 1.26E-05 | 0.00020 | 9.57              | 0.65            | Sfrs18        |
| 1444009_at         | 5.06           | 1.27E-05 | 0.00020 | 3.78              | 0.99            | Rassf4        |
| 1453582_at         | 5.05           | 1.27E-05 | 0.00020 | 4.81              | 1.09            | Chka          |
| 1422847_a_at       | 5.05           | 1.30E-05 | 0.00021 | 5.86              | 1.24            | Prkcd         |
| 1421064_at         | 5.04           | 1.31E-05 | 0.00021 | 9.34              | 0.72            | Mpp5          |
| 1426798_a_at       | 5.04           | 1.31E-05 | 0.00021 | 9.28              | 0.87            | Ppp1r15b      |
| 1453840_at         | 5.04           | 1.33E-05 | 0.00021 | 5.39              | 1.16            | Pabpc1        |
| 1449405_at         | 5.04           | 1.34E-05 | 0.00021 | 9.54              | 0.69            | Tns1          |
| 1433691_at         | 5.03           | 1.38E-05 | 0.00022 | 13.47             | 0.70            | Ppp1r3c       |
| 1448201_at         | 5.02           | 1.40E-05 | 0.00022 | 3.94              | 1.11            | Sfrp2         |
| 1448239_at         | 5.01           | 1.45E-05 | 0.00023 | 6.08              | 1.80            | Hmox1         |
| 1447448_s_at       | 5.01           | 1.47E-05 | 0.00023 | 9.42              | 0.85            | Klf6          |
| 1424609_a_at       | 5.01           | 1.48E-05 | 0.00023 | 10.83             | 0.84            | LOC545174     |
| 1422033_a_at       | 5.00           | 1.50E-05 | 0.00023 | 6.42              | 1.34            | Zfp91         |
| 1451080_at         | 5.00           | 1.50E-05 | 0.00023 | 9.41              | 0.69            | Usp1          |
| 1455353_at         | 5.00           | 1.52E-05 | 0.00024 | 9.92              | 0.76            | Tmcc1         |
| 1451714_a_at       | 5.00           | 1.52E-05 | 0.00024 | 11.06             | 0.62            | Map2k3        |
| 1423756_s_at       | 4.99           | 1.54E-05 | 0.00024 | 9.22              | 0.87            | Igfbp4        |
| 1424670_s_at       | 4.99           | 1.54E-05 | 0.00024 | 9.49              | 0.70            | Zfyve21       |
| 1440315_at         | 4.99           | 1.55E-05 | 0.00024 | 7.16              | 1.20            | Mbnl1         |
| 1434901_at         | 4.98           | 1.58E-05 | 0.00024 | 7.91              | 1.03            | Zbtb2         |
| 1442781_at         | 4.98           | 1.58E-05 | 0.00024 | 3.50              | 0.92            | Frrs1         |
| 1437745_at         | 4.98           | 1.59E-05 | 0.00024 | 7.68              | 0.90            | Chd7          |

| Probe <sup>1</sup> | t <sup>2</sup> | p-value  | q-value | Mean <sup>3</sup> | FC <sup>4</sup> | Symbol        |
|--------------------|----------------|----------|---------|-------------------|-----------------|---------------|
| 1422270_a_at       | 4.98           | 1.59E-05 | 0.00024 | 4.49              | 1.24            | Il6ra         |
| 1418561_at         | 4.98           | 1.62E-05 | 0.00025 | 7.86              | 0.85            | Sf3b1         |
| 1423451_at         | 4.97           | 1.64E-05 | 0.00025 | 9.94              | 0.71            | Pgrmc1        |
| 1450703_at         | 4.97           | 1.65E-05 | 0.00025 | 5.33              | 1.34            | Slc7a2        |
| 1425004_s_at       | 4.97           | 1.66E-05 | 0.00025 | 4.06              | 1.01            | Mocs1         |
| 1416062_at         | 4.97           | 1.67E-05 | 0.00025 | 6.90              | 1.03            | Tbc1d15       |
| 1441315_s_at       | 4.97           | 1.67E-05 | 0.00025 | 8.08              | 1.02            | Slc19a2       |
| 1428776_at         | 4.96           | 1.67E-05 | 0.00025 | 5.31              | 1.27            | Slc10a6       |
| 1451793_at         | 4.96           | 1.68E-05 | 0.00025 | 10.60             | 0.66            | Klhl24        |
| 1454149_a_at       | 4.96           | 1.68E-05 | 0.00026 | 8.35              | 0.82            | Ccnl2         |
| 1422869_at         | 4.96           | 1.69E-05 | 0.00026 | 4.90              | 1.06            | Mertk         |
| 1439029_at         | 4.96           | 1.70E-05 | 0.00026 | 9.35              | 0.80            | Gpt2          |
| 1429093_at         | 4.96           | 1.72E-05 | 0.00026 | 9.06              | 0.75            | Ddi2          |
| 1434888_a_at       | 4.95           | 1.73E-05 | 0.00026 | 10.51             | 0.63            | Matr3         |
| 1448265_x_at       | 4.95           | 1.74E-05 | 0.00026 | 6.48              | 1.26            | Mpzl2         |
| 1429441_at         | 4.95           | 1.77E-05 | 0.00026 | 8.26              | 0.90            | Fbxo30        |
| 1429336_at         | 4.94           | 1.78E-05 | 0.00027 | 6.76              | 1.18            | Tmem87b       |
| 1422551_at         | 4.94           | 1.79E-05 | 0.00027 | 8.23              | 0.82            | Zkscan3       |
| 1417324_at         | 4.94           | 1.79E-05 | 0.00027 | 9.73              | 0.70            | Mast2         |
| 1437711_x_at       | 4.94           | 1.79E-05 | 0.00027 | 12.49             | 0.53            | Odc1          |
| 1435341_at         | 4.94           | 1.80E-05 | 0.00027 | 9.20              | 0.73            | Ppig          |
| 1439233_at         | 4.94           | 1.80E-05 | 0.00027 | 5.21              | 1.12            | Tloc1         |
| 1440571_at         | 4.94           | 1.82E-05 | 0.00027 | 4.73              | 1.14            | Eif4g3        |
| 1420119_s_at       | 4.94           | 1.82E-05 | 0.00027 | 7.72              | 1.21            | AU020177      |
| 1425966_x_at       | 4.94           | 1.82E-05 | 0.00027 | 13.64             | 0.57            | Ubc           |
| 1425577_at         | 4.93           | 1.85E-05 | 0.00027 | 9.56              | 0.62            | Zmym5         |
| 1444557_at         | 4.93           | 1.85E-05 | 0.00027 | 4.46              | 1.10            | Sumo1         |
| 1428749_at         | 4.93           | 1.87E-05 | 0.00027 | 7.93              | 1.02            | Dmxl2         |
| 1426243_at         | 4.92           | 1.92E-05 | 0.00028 | 5.50              | 1.10            | Cth           |
| 1436322_a_at       | 4.92           | 1.94E-05 | 0.00028 | 9.06              | 0.67            | 2810001A02Rik |
| 1419646_a_at       | 4.91           | 1.97E-05 | 0.00029 | 9.35              | 1.06            | Mbp           |
| 1434555_at         | 4.91           | 1.99E-05 | 0.00029 | 7.90              | 0.84            | Anp32a        |
| 1448566_at         | 4.90           | 2.01E-05 | 0.00029 | 9.83              | 1.09            | Slc40a1       |
| 1456676_a_at       | 4.90           | 2.03E-05 | 0.00030 | 8.65              | 1.06            | Pfkfb3        |
| 1438519_at         | 4.90           | 2.05E-05 | 0.00030 | 9.57              | 0.76            | Klhl24        |
| 1438360_x_at       | 4.90           | 2.06E-05 | 0.00030 | 9.48              | 0.64            | Slc25a5       |
| 1423292_a_at       | 4.90           | 2.06E-05 | 0.00030 | 6.80              | 1.15            | Prx           |
| 1453591_at         | 4.89           | 2.09E-05 | 0.00030 | 3.50              | 0.94            | 5730437N04Rik |
| 1428853_at         | 4.89           | 2.10E-05 | 0.00030 | 9.15              | 0.74            | Ptch1         |
| 1434208_at         | 4.88           | 2.13E-05 | 0.00031 | 3.83              | 1.02            | Rnf169        |
| 1454967_at         | 4.88           | 2.19E-05 | 0.00031 | 8.84              | 0.83            | NA            |
| 1428143_a_at       | 4.88           | 2.20E-05 | 0.00031 | 11.40             | 0.94            | Pnpla2        |
| 1452406_x_at       | 4.87           | 2.22E-05 | 0.00032 | 6.63              | 1.17            | Erdr1         |
| 1434235_at         | 4.87           | 2.24E-05 | 0.00032 | 9.13              | 0.71            | Slc20a2       |
| 1443218_at         | 4.86           | 2.28E-05 | 0.00033 | 4.54              | 1.59            | NA            |
| 1454797_at         | 4.86           | 2.31E-05 | 0.00033 | 8.16              | 0.96            | Tmem55b       |
| 1420583_a_at       | 4.86           | 2.33E-05 | 0.00033 | 11.07             | 0.61            | Rora          |
| 1437862_at         | 4.86           | 2.33E-05 | 0.00033 | 8.68              | 0.90            | Rbm25         |
| 1435174_at         | 4.86           | 2.34E-05 | 0.00033 | 9.28              | 0.72            | Rsb1          |
| 1447707_s_at       | 4.85           | 2.34E-05 | 0.00033 | 9.19              | 0.71            | Pde2a         |
| 1452035_at         | 4.85           | 2.36E-05 | 0.00033 | 10.87             | 0.68            | Col4a1        |
| 1458129_at         | 4.85           | 2.36E-05 | 0.00033 | 9.55              | 0.66            | Rora          |
| 1434839_s_at       | 4.85           | 2.36E-05 | 0.00033 | 8.70              | 0.77            | Tbl1xr1       |

| Probe <sup>1</sup> | t <sup>2</sup> | p-value  | q-value | Mean <sup>3</sup> | FC <sup>4</sup> | Symbol        |
|--------------------|----------------|----------|---------|-------------------|-----------------|---------------|
| 1417273_at         | 4.85           | 2.37E-05 | 0.00033 | 14.63             | 0.51            | Pdk4          |
| 1438371_x_at       | 4.85           | 2.38E-05 | 0.00033 | 12.78             | 0.44            | Ddx5          |
| 1460500_at         | 4.85           | 2.41E-05 | 0.00034 | 4.41              | 1.18            | 5033421C21Rik |
| 1448448_a_at       | 4.84           | 2.43E-05 | 0.00034 | 8.34              | 0.75            | Chkb          |
| 1417483_at         | 4.84           | 2.45E-05 | 0.00034 | 7.17              | 1.19            | Nfkbiz        |
| 1421141_a_at       | 4.83           | 2.50E-05 | 0.00035 | 4.57              | 0.98            | Foxp1         |
| 1444107_at         | 4.83           | 2.51E-05 | 0.00035 | 8.19              | 0.91            | 9430029N19Rik |
| 1438824_at         | 4.83           | 2.53E-05 | 0.00035 | 4.71              | 1.59            | Slc20a1       |
| 1435080_x_at       | 4.83           | 2.54E-05 | 0.00035 | 8.92              | 0.77            | Sfrs18        |
| 1416922_a_at       | 4.82           | 2.62E-05 | 0.00036 | 11.25             | 0.62            | Bnip3l        |
| 1439342_at         | 4.82           | 2.62E-05 | 0.00036 | 7.78              | 0.98            | Clpx          |
| 1417266_at         | 4.81           | 2.64E-05 | 0.00036 | 8.94              | 1.29            | Ccl6          |
| 1452378_at         | 4.81           | 2.65E-05 | 0.00036 | 10.51             | 0.97            | Malat1        |
| 1437734_at         | 4.81           | 2.66E-05 | 0.00036 | 8.54              | 0.77            | Ppp1r12a      |
| 1457285_at         | 4.81           | 2.67E-05 | 0.00037 | 10.16             | 0.70            | Zfp187        |
| 1417061_at         | 4.81           | 2.68E-05 | 0.00037 | 11.28             | 0.97            | Slc40a1       |
| 1448525_a_at       | 4.81           | 2.68E-05 | 0.00037 | 8.70              | 0.73            | Bnip3l        |
| 1455151_at         | 4.81           | 2.70E-05 | 0.00037 | 9.40              | 0.67            | Akap9         |
| 1416084_at         | 4.80           | 2.74E-05 | 0.00037 | 12.12             | 0.64            | Zfand5        |
| 1438167_x_at       | 4.80           | 2.74E-05 | 0.00037 | 11.47             | 0.51            | Flcn          |
| 1427747_a_at       | 4.80           | 2.78E-05 | 0.00038 | 5.79              | 2.04            | Lcn2          |
| 1426368_at         | 4.80           | 2.80E-05 | 0.00038 | 8.01              | 1.05            | Rin2          |
| 1448503_at         | 4.79           | 2.81E-05 | 0.00038 | 13.04             | 0.39            | Mcl1          |
| 1456110_at         | 4.79           | 2.81E-05 | 0.00038 | 9.35              | 0.68            | Ankrd11       |
| 1455959_s_at       | 4.79           | 2.82E-05 | 0.00038 | 7.43              | 0.99            | Gclc          |
| 1452161_at         | 4.79           | 2.84E-05 | 0.00038 | 9.15              | 0.87            | Tiparp        |
| 1446713_at         | 4.79           | 2.88E-05 | 0.00039 | 5.62              | 1.20            | Tial1         |
| 1456340_at         | 4.78           | 2.91E-05 | 0.00039 | 5.95              | 1.62            | 2610205E22Rik |
| 1427056_at         | 4.78           | 2.93E-05 | 0.00039 | 3.77              | 0.93            | Adamts15      |
| 1424034_at         | 4.78           | 2.93E-05 | 0.00039 | 10.23             | 0.62            | Rora          |
| 1426556_at         | 4.77           | 2.99E-05 | 0.00040 | 9.59              | 0.61            | Suhw4         |
| 1423006_at         | 4.77           | 3.01E-05 | 0.00040 | 4.16              | 0.97            | Pim1          |
| 1448859_at         | 4.77           | 3.03E-05 | 0.00040 | 5.86              | 1.41            | Cxcl13        |
| 1437405_a_at       | 4.77           | 3.03E-05 | 0.00040 | 11.08             | 0.75            | Igfbp4        |
| 1423750_a_at       | 4.77           | 3.03E-05 | 0.00040 | 8.67              | 0.71            | Sf1           |
| 1434386_at         | 4.76           | 3.11E-05 | 0.00041 | 8.84              | 0.73            | Atp2c1        |
| 1420494_x_at       | 4.76           | 3.13E-05 | 0.00041 | 14.72             | 0.44            | Ubc           |
| 1434832_at         | 4.76           | 3.14E-05 | 0.00041 | 9.35              | 0.79            | Foxo3a        |
| 1418007_at         | 4.76           | 3.16E-05 | 0.00042 | 9.15              | 0.72            | 1810007M14Rik |
| 1438081_at         | 4.76           | 3.16E-05 | 0.00042 | 6.10              | 1.07            | Mcc           |
| 1451657_a_at       | 4.75           | 3.18E-05 | 0.00042 | 6.69              | 1.14            | Enox2         |
| 1417590_at         | 4.75           | 3.19E-05 | 0.00042 | 10.31             | 0.64            | Cyp27a1       |
| 1416811_s_at       | 4.75           | 3.21E-05 | 0.00042 | 9.25              | 0.75            | Ctla2a        |
| 1437538_at         | 4.75           | 3.23E-05 | 0.00042 | 3.28              | 0.84            | Snhg7         |
| 1448183_a_at       | 4.75           | 3.25E-05 | 0.00042 | 6.28              | 0.93            | Hif1a         |
| 1440830_at         | 4.74           | 3.27E-05 | 0.00043 | 10.35             | 0.60            | Gpr116        |
| 1460349_at         | 4.74           | 3.30E-05 | 0.00043 | 9.27              | 0.72            | Prr14         |
| 1419208_at         | 4.74           | 3.30E-05 | 0.00043 | 4.46              | 1.18            | Map3k8        |
| 1429165_at         | 4.74           | 3.32E-05 | 0.00043 | 6.29              | 1.07            | 3110001I22Rik |
| 1455936_a_at       | 4.73           | 3.39E-05 | 0.00044 | 5.33              | 1.30            | Rbpms         |
| 1436515_at         | 4.73           | 3.40E-05 | 0.00044 | 6.65              | 1.47            | Bach2         |
| 1420253_at         | 4.73           | 3.41E-05 | 0.00044 | 3.90              | 0.92            | D2Ert63e      |
| 1416236_a_at       | 4.73           | 3.41E-05 | 0.00044 | 5.84              | 1.35            | Mpzl2         |

| Probe <sup>1</sup> | t <sup>2</sup> | p-value  | q-value | Mean <sup>3</sup> | FC <sup>4</sup> | Symbol        |
|--------------------|----------------|----------|---------|-------------------|-----------------|---------------|
| 1421571_a_at       | 4.73           | 3.44E-05 | 0.00044 | 10.84             | 0.57            | Ly6c1         |
| 1428210_s_at       | 4.73           | 3.46E-05 | 0.00044 | 8.86              | 0.69            | Chuk          |
| 1436606_at         | 4.73           | 3.46E-05 | 0.00045 | 6.28              | 1.18            | Zfp498        |
| 1453155_at         | 4.72           | 3.50E-05 | 0.00045 | 9.19              | 0.72            | Tmem50a       |
| 1456865_x_at       | 4.72           | 3.53E-05 | 0.00045 | 11.00             | 0.73            | Rrs1          |
| 1452350_at         | 4.71           | 3.61E-05 | 0.00046 | 6.10              | 1.05            | Brd8          |
| 1445456_at         | 4.71           | 3.61E-05 | 0.00046 | 4.12              | 0.93            | NA            |
| 1436884_x_at       | 4.71           | 3.64E-05 | 0.00046 | 9.55              | 0.58            | Ewsr1         |
| 1420342_at         | 4.71           | 3.67E-05 | 0.00047 | 8.00              | 0.97            | Gdap10        |
| 1417851_at         | 4.70           | 3.72E-05 | 0.00047 | 7.80              | 2.34            | Cxcl13        |
| 1435163_at         | 4.70           | 3.73E-05 | 0.00047 | 7.11              | 0.99            | 9030612M13Rik |
| 1438700_at         | 4.70           | 3.74E-05 | 0.00047 | 6.80              | 1.11            | Fnbp4         |
| 1427162_a_at       | 4.70           | 3.74E-05 | 0.00047 | 9.83              | 0.62            | Elk4          |
| 1449292_at         | 4.70           | 3.78E-05 | 0.00048 | 10.79             | 0.57            | Rb1cc1        |
| 1452371_at         | 4.69           | 3.81E-05 | 0.00048 | 10.59             | 0.57            | Sfrs11        |
| 1423982_at         | 4.69           | 3.82E-05 | 0.00048 | 9.45              | 0.61            | Fusip1        |
| 1437461_s_at       | 4.69           | 3.84E-05 | 0.00048 | 9.38              | 0.61            | Rnpc3         |
| 1432827_x_at       | 4.69           | 3.88E-05 | 0.00048 | 14.32             | 0.41            | Ubc           |
| 1437735_at         | 4.68           | 3.92E-05 | 0.00049 | 9.75              | 0.60            | Ppp1r12a      |
| 1428539_at         | 4.68           | 3.97E-05 | 0.00049 | 8.18              | 0.88            | 2610207I05Rik |
| 1440076_at         | 4.68           | 3.98E-05 | 0.00049 | 6.07              | 1.22            | Sqstm1        |
| 1431252_a_at       | 4.68           | 3.99E-05 | 0.00049 | 6.87              | 1.11            | Zfp655        |
| 1450990_at         | 4.68           | 4.02E-05 | 0.00050 | 6.70              | 0.97            | Gpc3          |
| 1420961_a_at       | 4.68           | 4.02E-05 | 0.00050 | 4.29              | 0.94            | Ivns1abp      |
| 1434280_at         | 4.68           | 4.03E-05 | 0.00050 | 8.04              | 1.39            | Wiz           |
| 1422603_at         | 4.67           | 4.05E-05 | 0.00050 | 10.92             | 0.69            | Rnase4        |
| 1457027_at         | 4.67           | 4.15E-05 | 0.00051 | 5.94              | 1.10            | Dhtkd1        |
| 1460099_at         | 4.66           | 4.18E-05 | 0.00051 | 3.53              | 0.85            | Atp9b         |
| 1416424_at         | 4.66           | 4.19E-05 | 0.00051 | 7.53              | 0.93            | M6prbp1       |
| 1457302_at         | 4.65           | 4.31E-05 | 0.00053 | 5.05              | 1.12            | Slc20a2       |
| 1454664_a_at       | 4.65           | 4.31E-05 | 0.00053 | 11.74             | 0.51            | Eif5          |
| 1448391_at         | 4.65           | 4.37E-05 | 0.00053 | 10.10             | 0.62            | Rab9          |
| 1454605_a_at       | 4.65           | 4.42E-05 | 0.00054 | 7.48              | 0.91            | Pi4k2a        |
| 1417124_at         | 4.64           | 4.48E-05 | 0.00055 | 11.01             | 0.76            | Dstn          |
| 1426810_at         | 4.64           | 4.49E-05 | 0.00055 | 7.86              | 0.76            | Jmjd1a        |
| 1437747_at         | 4.64           | 4.50E-05 | 0.00055 | 7.28              | 1.34            | Ube4a         |
| 1437878_s_at       | 4.64           | 4.52E-05 | 0.00055 | 8.37              | 0.88            | Ttc14         |
| 1418048_at         | 4.63           | 4.57E-05 | 0.00055 | 9.55              | 0.56            | 1110059G10Rik |
| 1459765_s_at       | 4.63           | 4.57E-05 | 0.00055 | 12.47             | 0.47            | Sf1           |
| 1415688_at         | 4.63           | 4.59E-05 | 0.00055 | 12.64             | 0.40            | Ube2g1        |
| 1439316_at         | 4.63           | 4.60E-05 | 0.00055 | 7.50              | 0.91            | Rbm39         |
| 1449254_at         | 4.63           | 4.60E-05 | 0.00055 | 7.89              | 1.02            | Spp1          |
| 1457035_at         | 4.63           | 4.61E-05 | 0.00055 | 7.92              | 1.09            | AI607873      |
| 1438954_x_at       | 4.63           | 4.63E-05 | 0.00056 | 7.95              | 1.10            | Figf          |
| 1423047_at         | 4.62           | 4.70E-05 | 0.00056 | 8.93              | 0.70            | Tollip        |
| 1432665_at         | 4.62           | 4.75E-05 | 0.00057 | 5.79              | 1.07            | 2210416J07Rik |
| 1439173_at         | 4.62           | 4.76E-05 | 0.00057 | 5.66              | 1.19            | Hook1         |
| 1422018_at         | 4.62           | 4.79E-05 | 0.00057 | 9.93              | 0.68            | Hivep2        |
| 1455399_at         | 4.61           | 4.86E-05 | 0.00058 | 10.78             | 0.66            | Cnksr1        |
| 1422025_at         | 4.61           | 4.89E-05 | 0.00058 | 6.10              | 1.08            | Mitf          |
| 1448228_at         | 4.61           | 4.90E-05 | 0.00058 | 7.95              | 1.51            | Lox           |
| 1424540_at         | 4.61           | 4.90E-05 | 0.00058 | 8.84              | 0.76            | Hipk1         |
| 1440373_at         | 4.61           | 4.93E-05 | 0.00058 | 5.01              | 1.04            | Elavl1        |

| Probe <sup>1</sup> | t <sup>2</sup> | p-value  | q-value | Mean <sup>3</sup> | FC <sup>4</sup> | Symbol             |
|--------------------|----------------|----------|---------|-------------------|-----------------|--------------------|
| 1423875_at         | 4.60           | 5.08E-05 | 0.00060 | 5.96              | 1.10            | AI450540           |
| 1425319_s_at       | 4.59           | 5.18E-05 | 0.00061 | 9.38              | 0.58            | 6530403A03Rik      |
| 1416860_s_at       | 4.59           | 5.23E-05 | 0.00061 | 9.39              | 0.61            | Ing1               |
| 1418469_at         | 4.59           | 5.24E-05 | 0.00061 | 8.11              | 0.92            | Nrip1              |
| 1417145_at         | 4.59           | 5.24E-05 | 0.00061 | 5.77              | 1.04            | Nfxl1              |
| 1452519_a_at       | 4.59           | 5.26E-05 | 0.00062 | 8.54              | 1.23            | Zfp36              |
| 1453185_at         | 4.59           | 5.26E-05 | 0.00062 | 8.22              | 0.81            | Sfrs18             |
| 1460541_at         | 4.58           | 5.30E-05 | 0.00062 | 6.35              | 1.11            | Slc7a6             |
| 1446146_at         | 4.58           | 5.38E-05 | 0.00063 | 4.34              | 0.94            | Gjc1               |
| 1458423_at         | 4.58           | 5.41E-05 | 0.00063 | 5.55              | 1.03            | Luc7l2             |
| 1428301_at         | 4.58           | 5.42E-05 | 0.00063 | 6.76              | 1.39            | ENSMUSG00000068790 |
| 1430978_at         | 4.58           | 5.46E-05 | 0.00063 | 5.40              | 0.96            | Rps25              |
| 1424988_at         | 4.57           | 5.46E-05 | 0.00063 | 9.84              | 0.57            | Myliip             |
| 1432195_s_at       | 4.57           | 5.51E-05 | 0.00064 | 9.66              | 0.62            | Ccnl2              |
| 1429217_at         | 4.57           | 5.55E-05 | 0.00064 | 5.83              | 1.10            | Zfp655             |
| 1452774_at         | 4.57           | 5.58E-05 | 0.00064 | 10.75             | 0.54            | Hnrpa3             |
| 1435748_at         | 4.57           | 5.59E-05 | 0.00064 | 7.84              | 0.93            | Gda                |
| 1418640_at         | 4.56           | 5.79E-05 | 0.00066 | 8.94              | 0.66            | Sirt1              |
| 1425476_at         | 4.55           | 5.81E-05 | 0.00066 | 6.52              | 0.98            | Col4a5             |
| 1452502_at         | 4.55           | 5.86E-05 | 0.00067 | 2.97              | 0.73            | ENSMUSG00000050599 |
| 1426792_s_at       | 4.55           | 5.90E-05 | 0.00067 | 6.87              | 1.06            | Rusc2              |
| 1431541_at         | 4.54           | 6.01E-05 | 0.00069 | 3.33              | 0.78            | Stt3b              |
| 1433654_at         | 4.54           | 6.09E-05 | 0.00069 | 11.42             | 0.54            | Mgea5              |
| 1424669_at         | 4.54           | 6.10E-05 | 0.00069 | 8.36              | 0.72            | Zfyve21            |
| 1426124_a_at       | 4.54           | 6.11E-05 | 0.00069 | 11.38             | 0.61            | Clk1               |
| 1453760_at         | 4.54           | 6.12E-05 | 0.00069 | 6.14              | 1.34            | Mier1              |
| 1438322_x_at       | 4.53           | 6.17E-05 | 0.00070 | 11.59             | 0.56            | Fdft1              |
| 1418250_at         | 4.53           | 6.18E-05 | 0.00070 | 6.15              | 1.59            | Arl4d              |
| 1458083_at         | 4.53           | 6.29E-05 | 0.00071 | 4.12              | 0.92            | 4932438A13Rik      |
| 1422793_at         | 4.53           | 6.34E-05 | 0.00071 | 8.19              | 0.90            | Pafah1b2           |
| 1433924_at         | 4.53           | 6.34E-05 | 0.00071 | 10.60             | 1.20            | Peg3               |
| 1431218_at         | 4.53           | 6.34E-05 | 0.00071 | 5.43              | 1.17            | Zdhhc20            |
| 1458346_x_at       | 4.52           | 6.38E-05 | 0.00072 | 5.27              | 0.97            | Atp2b1             |
| 1418094_s_at       | 4.52           | 6.43E-05 | 0.00072 | 6.65              | 1.19            | Car4               |
| 1422153_a_at       | 4.52           | 6.52E-05 | 0.00073 | 12.78             | 0.45            | Asb11              |
| 1445198_at         | 4.52           | 6.52E-05 | 0.00073 | 5.63              | 1.28            | Utx                |
| 1428724_at         | 4.52           | 6.53E-05 | 0.00073 | 5.19              | 1.06            | Pcf11              |
| 1438761_a_at       | 4.51           | 6.57E-05 | 0.00073 | 11.20             | 0.59            | EG666231           |
| 1424251_a_at       | 4.51           | 6.61E-05 | 0.00074 | 11.84             | 0.54            | Hnrpd1             |
| 1443962_at         | 4.51           | 6.64E-05 | 0.00074 | 8.67              | 0.81            | Tfdp2              |
| 1450890_a_at       | 4.51           | 6.67E-05 | 0.00074 | 9.68              | 0.57            | Abi1               |
| 1418323_at         | 4.51           | 6.69E-05 | 0.00074 | 5.93              | 1.12            | Fem1b              |
| 1444591_at         | 4.51           | 6.70E-05 | 0.00074 | 5.67              | 1.09            | Pik3r1             |
| 1448908_at         | 4.50           | 6.76E-05 | 0.00075 | 9.84              | 0.60            | Ppap2b             |
| 1423375_at         | 4.50           | 6.79E-05 | 0.00075 | 7.03              | 0.88            | 1700023B02Rik      |
| 1426985_s_at       | 4.49           | 6.97E-05 | 0.00077 | 8.57              | 0.71            | 2810485I05Rik      |
| 1419553_a_at       | 4.49           | 6.97E-05 | 0.00077 | 10.19             | 0.55            | Rabggtb            |
| 1443893_at         | 4.49           | 7.00E-05 | 0.00077 | 3.45              | 0.78            | Ywhaz              |
| 1434044_at         | 4.49           | 7.07E-05 | 0.00077 | 9.33              | 0.67            | Repin1             |
| 1448149_at         | 4.49           | 7.10E-05 | 0.00078 | 10.16             | 0.59            | Ctnna1             |
| 1420310_at         | 4.49           | 7.12E-05 | 0.00078 | 5.26              | 2.52            | NA                 |
| 1434177_at         | 4.48           | 7.20E-05 | 0.00078 | 6.08              | 0.98            | Ece1               |
| 1438730_at         | 4.48           | 7.25E-05 | 0.00079 | 4.55              | 1.02            | BC028801           |



| Probe <sup>1</sup> | t <sup>2</sup> | p-value  | q-value | Mean <sup>3</sup> | FC <sup>4</sup> | Symbol        |
|--------------------|----------------|----------|---------|-------------------|-----------------|---------------|
| 1435346_at         | 4.48           | 7.27E-05 | 0.00079 | 7.53              | 0.84            | Ccdc82        |
| 1441224_at         | 4.47           | 7.39E-05 | 0.00080 | 5.64              | 1.16            | Drp2          |
| 1420394_s_at       | 4.47           | 7.41E-05 | 0.00080 | 6.96              | 1.13            | Lilrb4        |
| 1428100_at         | 4.47           | 7.43E-05 | 0.00080 | 9.14              | 0.67            | Sfrs1         |
| 1456541_x_at       | 4.47           | 7.47E-05 | 0.00081 | 10.00             | 0.55            | Atad3a        |
| 1429515_at         | 4.47           | 7.56E-05 | 0.00082 | 9.91              | 0.61            | Ubr2          |
| 1439920_at         | 4.47           | 7.56E-05 | 0.00082 | 4.24              | 1.01            | NA            |
| 1418033_s_at       | 4.46           | 7.67E-05 | 0.00083 | 3.68              | 0.81            | Zkscan6       |
| 1419255_at         | 4.46           | 7.69E-05 | 0.00083 | 7.95              | 0.83            | Spnb2         |
| 1423170_at         | 4.46           | 7.72E-05 | 0.00083 | 7.36              | 0.90            | Taf7          |
| 1429806_at         | 4.46           | 7.73E-05 | 0.00083 | 4.87              | 0.92            | Eral1         |
| 1454774_at         | 4.46           | 7.74E-05 | 0.00083 | 10.64             | 0.54            | Zfp445        |
| 1449733_s_at       | 4.45           | 7.86E-05 | 0.00084 | 7.57              | 0.85            | Siah1a        |
| 1449028_at         | 4.45           | 7.87E-05 | 0.00084 | 8.67              | 0.74            | Rhou          |
| 1422811_at         | 4.45           | 7.98E-05 | 0.00086 | 8.53              | 0.89            | Slc27a1       |
| 1443388_at         | 4.45           | 8.00E-05 | 0.00086 | 3.63              | 0.81            | 1300018I05Rik |
| 1452960_at         | 4.45           | 8.03E-05 | 0.00086 | 8.59              | 0.74            | Scyl3         |
| 1433574_at         | 4.45           | 8.05E-05 | 0.00086 | 8.91              | 0.68            | Cdc37l1       |
| 1436740_at         | 4.44           | 8.14E-05 | 0.00087 | 8.68              | 0.65            | 6820431F20Rik |
| 1440815_x_at       | 4.44           | 8.20E-05 | 0.00087 | 3.85              | 1.21            | LOC624112     |
| 1436455_at         | 4.44           | 8.23E-05 | 0.00088 | 3.64              | 1.37            | Asph          |
| 1429080_at         | 4.44           | 8.26E-05 | 0.00088 | 8.81              | 0.65            | Mphosph10     |
| 1435221_at         | 4.44           | 8.30E-05 | 0.00088 | 5.14              | 1.06            | NA            |
| 1429514_at         | 4.43           | 8.34E-05 | 0.00088 | 11.17             | 0.57            | Ppap2b        |
| 1436697_at         | 4.42           | 8.63E-05 | 0.00091 | 7.18              | 0.89            | NA            |
| 1425001_at         | 4.42           | 8.65E-05 | 0.00091 | 6.79              | 1.08            | Rnf146        |
| 1455082_at         | 4.42           | 8.69E-05 | 0.00092 | 8.29              | 0.89            | Cblb          |
| 1449038_at         | 4.42           | 8.74E-05 | 0.00092 | 7.83              | 1.08            | Hsd11b1       |
| 1435833_at         | 4.42           | 8.80E-05 | 0.00093 | 4.82              | 0.94            | NA            |
| 1423436_at         | 4.41           | 8.84E-05 | 0.00093 | 5.51              | 1.39            | Gsta3         |
| 1460336_at         | 4.41           | 8.86E-05 | 0.00093 | 9.28              | 1.02            | Ppargc1a      |
| 1425559_a_at       | 4.41           | 8.87E-05 | 0.00093 | 4.00              | 1.16            | Acsn3         |
| 1457491_at         | 4.41           | 8.89E-05 | 0.00093 | 3.58              | 0.71            | Plekha1       |
| 1416727_a_at       | 4.41           | 8.96E-05 | 0.00094 | 11.53             | 0.64            | Cyb5          |
| 1443983_at         | 4.41           | 8.99E-05 | 0.00094 | 8.21              | 0.99            | Sorbs1        |
| 1425522_at         | 4.40           | 9.28E-05 | 0.00097 | 4.77              | 1.02            | Rbm25         |
| 1424937_at         | 4.40           | 9.29E-05 | 0.00097 | 9.77              | 0.75            | 2310076L09Rik |
| 1430295_at         | 4.40           | 9.37E-05 | 0.00097 | 6.44              | 1.04            | Gna13         |
| 1425745_a_at       | 4.39           | 9.43E-05 | 0.00098 | 13.47             | 0.55            | Tacc2         |
| 1437001_at         | 4.39           | 9.61E-05 | 0.00100 | 9.43              | 0.73            | Gsk3b         |
| 1425631_at         | 4.39           | 9.66E-05 | 0.00100 | 11.67             | 0.73            | Ppp1r3c       |
| 1443926_at         | 4.38           | 9.69E-05 | 0.00100 | 3.57              | 0.73            | Meis2         |
| 1422461_at         | 4.38           | 9.71E-05 | 0.00100 | 7.48              | 0.89            | Atad3a        |
| 1434548_at         | 4.38           | 9.93E-05 | 0.00102 | 7.56              | 0.85            | Serinc3       |
| 1456256_at         | 4.37           | 0.00010  | 0.00103 | 10.17             | 0.58            | Eif5          |
| 1417654_at         | 4.37           | 0.00010  | 0.00103 | 7.43              | 0.81            | Sdc4          |
| 1426599_a_at       | 4.37           | 0.00010  | 0.00103 | 8.17              | 0.94            | Slc2a1        |
| 1454815_at         | 4.37           | 0.00010  | 0.00104 | 9.98              | 0.64            | Sertad2       |
| 1449484_at         | 4.37           | 0.00010  | 0.00105 | 3.88              | 1.05            | Stc2          |
| 1416121_at         | 4.36           | 0.00010  | 0.00105 | 8.19              | 1.18            | Lox           |
| 1419766_at         | 4.36           | 0.00010  | 0.00105 | 4.26              | 0.84            | Snf1lk        |
| 1426154_s_at       | 4.36           | 0.00010  | 0.00106 | 5.15              | 1.32            | Mup3          |
| 1429337_at         | 4.36           | 0.00011  | 0.00107 | 6.81              | 1.11            | Tmem87b       |

| Probe <sup>1</sup> | t <sup>2</sup> | p-value | q-value | Mean <sup>3</sup> | FC <sup>4</sup> | Symbol        |
|--------------------|----------------|---------|---------|-------------------|-----------------|---------------|
| 1436893_a_at       | 4.36           | 0.00011 | 0.00107 | 9.67              | 0.61            | Mar-07        |
| 1422397_a_at       | 4.35           | 0.00011 | 0.00107 | 6.08              | 0.90            | Il15ra        |
| 1421880_at         | 4.35           | 0.00011 | 0.00107 | 9.25              | 0.68            | Mtmr1         |
| 1444036_at         | 4.34           | 0.00011 | 0.00111 | 4.26              | 0.99            | Ppp2r5a       |
| 1420174_s_at       | 4.34           | 0.00011 | 0.00111 | 8.28              | 0.81            | Tax1bp1       |
| 1448005_at         | 4.34           | 0.00011 | 0.00111 | 9.48              | 0.64            | Sash1         |
| 1416041_at         | 4.34           | 0.00011 | 0.00111 | 12.75             | 0.98            | Sgk1          |
| 1423632_at         | 4.33           | 0.00011 | 0.00113 | 7.43              | 0.80            | Gpr146        |
| 1430542_a_at       | 4.33           | 0.00011 | 0.00114 | 9.47              | 0.58            | Slc25a5       |
| 1440123_at         | 4.32           | 0.00012 | 0.00116 | 4.35              | 0.93            | NA            |
| 1426372_a_at       | 4.32           | 0.00012 | 0.00117 | 8.11              | 0.84            | Bet1l         |
| 1438443_at         | 4.32           | 0.00012 | 0.00118 | 10.64             | 0.54            | Zbtb20        |
| 1448986_x_at       | 4.32           | 0.00012 | 0.00118 | 8.58              | 0.84            | Dnase2a       |
| 1416324_s_at       | 4.31           | 0.00012 | 0.00119 | 9.01              | 0.84            | Kctd20        |
| 1424883_s_at       | 4.31           | 0.00012 | 0.00119 | 10.74             | 0.50            | Sfrs7         |
| 1434694_at         | 4.31           | 0.00012 | 0.00121 | 8.92              | 0.62            | Lrrc8a        |
| 1426979_at         | 4.30           | 0.00012 | 0.00121 | 10.42             | 0.57            | Mlxip         |
| 1428967_at         | 4.30           | 0.00012 | 0.00123 | 7.22              | 0.76            | Igf1r         |
| 1441976_at         | 4.29           | 0.00013 | 0.00125 | 4.72              | 0.91            | 5430434G16Rik |
| 1453817_at         | 4.29           | 0.00013 | 0.00125 | 4.55              | 1.01            | Abca6         |
| 1448900_at         | 4.29           | 0.00013 | 0.00125 | 9.20              | 0.65            | D16H22S680E   |
| 1438946_at         | 4.29           | 0.00013 | 0.00127 | 4.98              | 0.98            | Pdgfra        |
| 1451839_a_at       | 4.29           | 0.00013 | 0.00127 | 10.07             | 0.57            | Pde7a         |
| 1440726_at         | 4.29           | 0.00013 | 0.00127 | 4.34              | 0.84            | A230062I15Rik |
| 1451336_at         | 4.28           | 0.00013 | 0.00129 | 6.24              | 0.97            | Lgals4        |
| 1417422_at         | 4.28           | 0.00013 | 0.00129 | 5.42              | 1.02            | Gnmt          |
| 1428348_at         | 4.28           | 0.00013 | 0.00130 | 9.40              | 0.53            | Gzf1          |
| 1422469_at         | 4.27           | 0.00013 | 0.00131 | 8.50              | 0.65            | Tbk1          |
| 1436759_x_at       | 4.27           | 0.00013 | 0.00131 | 10.68             | 0.53            | Cnn3          |
| 1453189_at         | 4.27           | 0.00014 | 0.00132 | 4.74              | 0.98            | Ube2i         |
| 1441115_at         | 4.27           | 0.00014 | 0.00133 | 4.82              | 1.16            | D18Ert232e    |
| 1459477_at         | 4.26           | 0.00014 | 0.00134 | 3.94              | 0.78            | Gabarapl2     |
| 1418058_at         | 4.26           | 0.00014 | 0.00135 | 8.30              | 0.66            | Elt1          |
| 1456378_s_at       | 4.26           | 0.00014 | 0.00136 | 8.80              | 0.67            | Fbxl20        |
| 1459760_at         | 4.26           | 0.00014 | 0.00136 | 3.58              | 0.88            | Ndufs4        |
| 1429479_at         | 4.25           | 0.00014 | 0.00137 | 3.77              | 0.71            | Magef1        |
| 1422900_at         | 4.25           | 0.00014 | 0.00137 | 7.24              | 0.83            | Mgea5         |
| 1429081_at         | 4.25           | 0.00014 | 0.00137 | 10.29             | 0.63            | Gcc2          |
| 1440563_at         | 4.25           | 0.00014 | 0.00137 | 4.41              | 0.91            | 2010111I01Rik |
| 1419829_a_at       | 4.25           | 0.00014 | 0.00137 | 6.87              | 0.96            | Gab2          |
| 1436318_at         | 4.25           | 0.00015 | 0.00139 | 8.92              | 0.60            | Tardbp        |
| 1427907_at         | 4.23           | 0.00015 | 0.00145 | 6.50              | 0.91            | 1110037F02Rik |
| 1437424_at         | 4.23           | 0.00015 | 0.00146 | 6.65              | 0.94            | Syde2         |
| 1454174_a_at       | 4.23           | 0.00016 | 0.00147 | 5.36              | 1.03            | C330007P06Rik |
| 1419700_a_at       | 4.23           | 0.00016 | 0.00147 | 6.93              | 1.04            | Prom1         |
| 1443762_s_at       | 4.22           | 0.00016 | 0.00149 | 7.93              | 0.79            | Sbf2          |
| 1420888_at         | 4.22           | 0.00016 | 0.00150 | 6.00              | 0.94            | Bcl2l1        |
| 1416323_at         | 4.22           | 0.00016 | 0.00150 | 8.97              | 0.91            | Kctd20        |
| 1421122_at         | 4.22           | 0.00016 | 0.00150 | 8.47              | 0.68            | Cbll1         |
| 1460315_s_at       | 4.21           | 0.00016 | 0.00152 | 9.61              | 0.56            | Tbk1          |
| 1451335_at         | 4.21           | 0.00016 | 0.00152 | 6.37              | 1.57            | Plac8         |
| 1441177_at         | 4.21           | 0.00016 | 0.00153 | 4.10              | 0.93            | NA            |
| 1438506_s_at       | 4.21           | 0.00016 | 0.00154 | 7.81              | 0.71            | Abi1          |

| Probe <sup>1</sup> | t <sup>2</sup> | p-value | q-value | Mean <sup>3</sup> | FC <sup>4</sup> | Symbol        |
|--------------------|----------------|---------|---------|-------------------|-----------------|---------------|
| 1419283_s_at       | 4.21           | 0.00016 | 0.00154 | 10.94             | 0.58            | Tns1          |
| 1427043_s_at       | 4.20           | 0.00017 | 0.00155 | 9.45              | 0.85            | Enox2         |
| 1452209_at         | 4.20           | 0.00017 | 0.00156 | 9.55              | 0.61            | Pkp4          |
| 1453186_at         | 4.20           | 0.00017 | 0.00157 | 8.49              | 0.63            | Sfrs18        |
| 1459641_at         | 4.19           | 0.00017 | 0.00158 | 4.08              | 0.90            | Psmb2         |
| 1435089_at         | 4.19           | 0.00017 | 0.00158 | 4.55              | 0.97            | 2010111I01Rik |
| 1459917_at         | 4.19           | 0.00017 | 0.00159 | 5.83              | 1.02            | Ggnbp2        |
| 1440833_at         | 4.19           | 0.00017 | 0.00161 | 4.51              | 0.89            | Cdc2l5        |
| 1453224_at         | 4.18           | 0.00018 | 0.00162 | 8.04              | 0.86            | Zfand5        |
| 1418892_at         | 4.18           | 0.00018 | 0.00163 | 8.54              | 0.66            | Rhoj          |
| 1452590_a_at       | 4.18           | 0.00018 | 0.00164 | 6.19              | 1.05            | Plac9         |
| 1437041_at         | 4.18           | 0.00018 | 0.00164 | 10.51             | 0.58            | Sfrs18        |
| 1452268_at         | 4.18           | 0.00018 | 0.00164 | 8.96              | 0.59            | 2810485I05Rik |
| 1423772_x_at       | 4.18           | 0.00018 | 0.00164 | 10.47             | 0.53            | Slc25a5       |
| 1435072_at         | 4.18           | 0.00018 | 0.00165 | 9.13              | 0.99            | Zfyve1        |
| 1457915_at         | 4.17           | 0.00018 | 0.00165 | 5.46              | 0.89            | 4833442J19Rik |
| 1427038_at         | 4.17           | 0.00018 | 0.00166 | 6.24              | 0.98            | Penk1         |
| 1418146_a_at       | 4.17           | 0.00018 | 0.00166 | 9.45              | 0.67            | Rbl2          |
| 1436947_a_at       | 4.17           | 0.00018 | 0.00167 | 12.54             | 0.40            | Txn1          |
| 1439786_at         | 4.17           | 0.00018 | 0.00168 | 3.61              | 0.85            | Gab2          |
| 1423177_a_at       | 4.17           | 0.00019 | 0.00169 | 9.40              | 0.54            | Abi1          |
| 1420887_a_at       | 4.16           | 0.00019 | 0.00171 | 4.28              | 0.88            | Bcl2l1        |
| 1448254_at         | 4.16           | 0.00019 | 0.00171 | 7.19              | 1.38            | Ptn           |
| 1422902_s_at       | 4.16           | 0.00019 | 0.00173 | 9.27              | 0.65            | Mgea5         |
| 1438295_at         | 4.16           | 0.00019 | 0.00173 | 4.22              | 0.86            | Glcci1        |
| 1438433_at         | 4.15           | 0.00019 | 0.00174 | 5.53              | 0.86            | Whdc1         |
| 1417234_at         | 4.15           | 0.00019 | 0.00174 | 4.42              | 0.86            | Mmp11         |
| 1424537_at         | 4.15           | 0.00019 | 0.00175 | 3.30              | 1.05            | Gmcl1l        |
| 1425881_at         | 4.15           | 0.00019 | 0.00176 | 3.88              | 1.08            | Psg28         |
| 1439872_at         | 4.15           | 0.00020 | 0.00177 | 3.58              | 0.81            | NA            |
| 1437046_x_at       | 4.15           | 0.00020 | 0.00177 | 9.05              | 0.69            | 4930504E06Rik |
| 1451924_a_at       | 4.14           | 0.00020 | 0.00177 | 5.26              | 0.89            | Edn1          |
| 1449300_at         | 4.14           | 0.00020 | 0.00179 | 4.29              | 1.03            | Cttnbp2nl     |
| 1437807_x_at       | 4.14           | 0.00020 | 0.00180 | 11.60             | 0.53            | Ctnna1        |
| 1433462_a_at       | 4.14           | 0.00020 | 0.00180 | 5.84              | 1.01            | Pi4k2a        |
| 1443618_at         | 4.14           | 0.00020 | 0.00180 | 3.67              | 0.73            | Pdzd2         |
| 1449446_at         | 4.13           | 0.00020 | 0.00182 | 6.75              | 0.87            | Ccdc59        |
| 1425649_at         | 4.13           | 0.00021 | 0.00183 | 3.66              | 0.86            | Slc39a14      |
| 1431166_at         | 4.13           | 0.00021 | 0.00185 | 4.22              | 0.84            | Chd1          |
| 1457373_at         | 4.13           | 0.00021 | 0.00185 | 5.13              | 0.96            | NA            |
| 1438178_x_at       | 4.13           | 0.00021 | 0.00185 | 10.51             | 0.49            | Atad3a        |
| 1417162_at         | 4.13           | 0.00021 | 0.00185 | 10.53             | 0.60            | Tmbim1        |
| 1427171_at         | 4.12           | 0.00021 | 0.00186 | 8.30              | 0.70            | Rlf           |
| 1437200_at         | 4.12           | 0.00021 | 0.00188 | 10.38             | 0.49            | Fcho2         |
| 1418278_at         | 4.12           | 0.00021 | 0.00188 | 4.53              | 1.53            | Apoc3         |
| 1436970_a_at       | 4.12           | 0.00021 | 0.00188 | 10.11             | 0.54            | Pdgrfb        |
| 1417268_at         | 4.12           | 0.00021 | 0.00189 | 4.58              | 1.15            | Cd14          |
| 1429379_at         | 4.11           | 0.00022 | 0.00190 | 8.38              | 0.89            | Lyve1         |
| 1445561_at         | 4.11           | 0.00022 | 0.00190 | 3.33              | 0.65            | Grip1         |
| 1433740_at         | 4.11           | 0.00022 | 0.00190 | 8.55              | 0.68            | Tmem87b       |
| 1440396_at         | 4.11           | 0.00022 | 0.00191 | 4.16              | 0.85            | Mpp6          |
| 1449118_at         | 4.11           | 0.00022 | 0.00192 | 10.35             | 0.49            | Dbt           |
| 1447109_at         | 4.11           | 0.00022 | 0.00192 | 5.30              | 0.92            | Elavl1        |

| Probe <sup>1</sup> | t <sup>2</sup> | p-value | q-value | Mean <sup>3</sup> | FC <sup>4</sup> | Symbol        |
|--------------------|----------------|---------|---------|-------------------|-----------------|---------------|
| 1416048_at         | 4.11           | 0.00022 | 0.00192 | 7.39              | 0.88            | Phc2          |
| 1427888_a_at       | 4.11           | 0.00022 | 0.00192 | 10.00             | 0.53            | Spna2         |
| 1427163_at         | 4.10           | 0.00022 | 0.00195 | 7.57              | 0.77            | Ubr2          |
| 1418494_at         | 4.10           | 0.00022 | 0.00196 | 4.97              | 0.91            | Ebf2          |
| 1435749_at         | 4.10           | 0.00022 | 0.00196 | 7.54              | 0.85            | Gda           |
| 1457429_s_at       | 4.10           | 0.00023 | 0.00197 | 5.20              | 0.93            | Gm106         |
| 1425848_a_at       | 4.10           | 0.00023 | 0.00197 | 9.94              | 0.50            | Dusp26        |
| 1418627_at         | 4.10           | 0.00023 | 0.00197 | 6.92              | 0.92            | Gclm          |
| 1458452_at         | 4.10           | 0.00023 | 0.00197 | 6.85              | 0.91            | Ankrd11       |
| 1452332_at         | 4.10           | 0.00023 | 0.00197 | 6.42              | 0.84            | Ccdc85a       |
| 1448167_at         | 4.09           | 0.00023 | 0.00200 | 7.44              | 0.83            | Ifngr1        |
| 1425641_at         | 4.09           | 0.00023 | 0.00200 | 4.18              | 0.82            | Aff1          |
| 1422570_at         | 4.09           | 0.00023 | 0.00200 | 6.57              | 1.00            | Yy1           |
| 1453851_a_at       | 4.09           | 0.00023 | 0.00203 | 10.21             | 1.39            | Gadd45g       |
| 1455675_a_at       | 4.09           | 0.00023 | 0.00203 | 7.82              | 0.68            | Tial1         |
| 1416145_at         | 4.08           | 0.00024 | 0.00204 | 11.36             | 0.47            | Dhx15         |
| 1421917_at         | 4.08           | 0.00024 | 0.00204 | 9.84              | 0.53            | Pdgfra        |
| 1425066_a_at       | 4.08           | 0.00024 | 0.00204 | 9.00              | 0.62            | Mtmr14        |
| 1448022_at         | 4.08           | 0.00024 | 0.00206 | 3.69              | 1.02            | NA            |
| 1417719_at         | 4.08           | 0.00024 | 0.00207 | 8.54              | 0.68            | Sap30         |
| 1417694_at         | 4.08           | 0.00024 | 0.00207 | 8.29              | 0.86            | Gab1          |
| 1439989_at         | 4.07           | 0.00024 | 0.00208 | 3.80              | 0.86            | Tsc1          |
| 1429776_a_at       | 4.07           | 0.00024 | 0.00208 | 8.81              | 0.64            | Dnajb6        |
| 1429786_a_at       | 4.07           | 0.00024 | 0.00208 | 8.78              | 0.69            | Zwint         |
| 1455109_at         | 4.07           | 0.00024 | 0.00208 | 5.38              | 0.97            | Tbl1xr1       |
| 1429094_at         | 4.07           | 0.00025 | 0.00210 | 8.33              | 0.79            | Ddi2          |
| 1425384_a_at       | 4.07           | 0.00025 | 0.00210 | 6.89              | 1.01            | Ube4a         |
| 1437534_at         | 4.07           | 0.00025 | 0.00210 | 3.85              | 1.57            | EG668701      |
| 1431664_at         | 4.07           | 0.00025 | 0.00211 | 3.24              | 0.61            | Luc7l         |
| 1428697_at         | 4.06           | 0.00025 | 0.00215 | 9.19              | 0.58            | Dpp8          |
| 1458635_at         | 4.06           | 0.00025 | 0.00215 | 6.17              | 1.25            | 4832428D23Rik |
| 1450717_at         | 4.06           | 0.00026 | 0.00216 | 5.53              | 0.86            | Ang           |
| 1415822_at         | 4.06           | 0.00026 | 0.00216 | 9.03              | 0.60            | Scd2          |
| 1434681_at         | 4.06           | 0.00026 | 0.00216 | 9.69              | 0.63            | 4932441K18Rik |
| 1438321_x_at       | 4.05           | 0.00026 | 0.00217 | 10.60             | 0.65            | 4930504E06Rik |
| 1455429_at         | 4.05           | 0.00026 | 0.00218 | 8.15              | 0.77            | AI450540      |
| 1452610_at         | 4.05           | 0.00026 | 0.00218 | 4.84              | 0.87            | Zkscan14      |
| 1429810_at         | 4.05           | 0.00026 | 0.00218 | 5.33              | 1.02            | 4921505C17Rik |
| 1417902_at         | 4.05           | 0.00026 | 0.00218 | 7.00              | 0.84            | Slc19a2       |
| 1449342_at         | 4.05           | 0.00026 | 0.00220 | 7.74              | 1.56            | Ptplb         |
| 1416800_at         | 4.05           | 0.00026 | 0.00221 | 7.78              | 0.66            | Trpm7         |
| 1423249_at         | 4.04           | 0.00027 | 0.00224 | 7.82              | 0.83            | Nktr          |
| 1455083_at         | 4.04           | 0.00027 | 0.00225 | 8.41              | 0.63            | Atp11c        |
| 1456629_at         | 4.03           | 0.00027 | 0.00227 | 6.95              | 0.98            | Kank3         |
| 1453976_at         | 4.03           | 0.00028 | 0.00229 | 4.70              | 0.84            | 4432414F05Rik |
| 1429418_at         | 4.03           | 0.00028 | 0.00231 | 8.32              | 0.59            | Cdc14b        |
| 1431697_at         | 4.02           | 0.00028 | 0.00233 | 4.24              | 0.91            | Synj2         |
| 1460601_at         | 4.02           | 0.00028 | 0.00235 | 4.83              | 0.89            | Myrip         |
| 1428111_at         | 4.02           | 0.00029 | 0.00236 | 11.36             | 0.58            | Slc38a4       |
| 1422024_at         | 4.02           | 0.00029 | 0.00236 | 6.94              | 0.82            | Fli1          |
| 1421005_at         | 4.02           | 0.00029 | 0.00237 | 5.58              | 0.93            | Cep110        |
| 1452697_at         | 4.01           | 0.00029 | 0.00238 | 8.32              | 0.70            | Ctdp1         |
| 1456216_at         | 4.01           | 0.00029 | 0.00238 | 7.46              | 0.81            | NA            |

| Probe <sup>1</sup> | t <sup>2</sup> | p-value | q-value | Mean <sup>3</sup> | FC <sup>4</sup> | Symbol        |
|--------------------|----------------|---------|---------|-------------------|-----------------|---------------|
| 1428907_at         | 4.01           | 0.00029 | 0.00242 | 10.47             | 0.49            | Rbm25         |
| 1437114_at         | 4.01           | 0.00030 | 0.00244 | 5.61              | 0.95            | A930001N09Rik |
| 1437410_at         | 4.01           | 0.00030 | 0.00244 | 3.66              | 0.71            | Aldh2         |
| 1436770_x_at       | 4.00           | 0.00030 | 0.00244 | 4.93              | 0.97            | Psma1         |
| 1439568_at         | 4.00           | 0.00030 | 0.00245 | 3.36              | 0.81            | Greb1         |
| 1424778_at         | 4.00           | 0.00030 | 0.00247 | 5.57              | 0.96            | Reep3         |
| 1449816_at         | 4.00           | 0.00030 | 0.00247 | 5.20              | 0.87            | Sult5a1       |
| 1426827_at         | 4.00           | 0.00030 | 0.00248 | 9.50              | 0.49            | Ythdc1        |
| 1419181_at         | 4.00           | 0.00030 | 0.00248 | 8.77              | 0.57            | Zfp326        |
| 1422064_a_at       | 4.00           | 0.00030 | 0.00248 | 10.20             | 0.53            | Zbtb20        |
| 1433598_at         | 4.00           | 0.00031 | 0.00249 | 6.77              | 1.06            | Arglu1        |
| 1453015_at         | 3.99           | 0.00031 | 0.00251 | 7.70              | 0.97            | 5830471E12Rik |
| 1427263_at         | 3.99           | 0.00031 | 0.00251 | 8.45              | 0.89            | Xist          |
| 1447447_s_at       | 3.99           | 0.00031 | 0.00252 | 9.93              | 0.47            | Srrm1         |
| 1418187_at         | 3.99           | 0.00031 | 0.00253 | 7.39              | 0.74            | Ramp2         |
| 1440415_at         | 3.99           | 0.00031 | 0.00253 | 3.90              | 0.77            | 5830403L16Rik |
| 1455033_at         | 3.98           | 0.00032 | 0.00256 | 7.59              | 0.77            | B430201A12Rik |
| 1435171_at         | 3.98           | 0.00032 | 0.00256 | 7.78              | 0.74            | LOC100040353  |
| 1438320_s_at       | 3.98           | 0.00032 | 0.00257 | 8.05              | 0.84            | Mcm7          |
| 1439314_at         | 3.98           | 0.00032 | 0.00258 | 5.58              | 0.94            | Clock         |
| 1448690_at         | 3.98           | 0.00032 | 0.00258 | 3.76              | 0.70            | Kcnk1         |
| 1421140_a_at       | 3.98           | 0.00032 | 0.00259 | 5.44              | 0.86            | Foxp1         |
| 1460666_a_at       | 3.98           | 0.00032 | 0.00260 | 5.53              | 0.90            | Ebf3          |
| 1424768_at         | 3.97           | 0.00033 | 0.00260 | 9.33              | 0.53            | Cald1         |
| 1417936_at         | 3.97           | 0.00033 | 0.00262 | 8.20              | 1.09            | Ccl9          |
| 1455570_x_at       | 3.97           | 0.00033 | 0.00262 | 10.32             | 0.52            | Cnn3          |
| 1424124_at         | 3.97           | 0.00033 | 0.00263 | 9.83              | 0.50            | Mospd2        |
| 1450407_a_at       | 3.97           | 0.00033 | 0.00264 | 9.11              | 0.56            | Anp32a        |
| 1436624_at         | 3.97           | 0.00033 | 0.00264 | 6.02              | 1.09            | Dnm3          |
| 1425456_a_at       | 3.97           | 0.00033 | 0.00264 | 8.99              | 0.57            | Map2k3        |
| 1431024_a_at       | 3.97           | 0.00033 | 0.00264 | 7.82              | 0.69            | Arid4b        |
| 1434161_at         | 3.97           | 0.00033 | 0.00265 | 8.82              | 0.58            | Lin52         |
| 1452914_at         | 3.97           | 0.00033 | 0.00265 | 4.22              | 0.85            | 2410024N18Rik |
| 1448256_at         | 3.96           | 0.00034 | 0.00272 | 4.39              | 0.88            | Gosr1         |
| 1445048_at         | 3.96           | 0.00034 | 0.00272 | 4.28              | 0.81            | Baz2b         |
| 1436769_at         | 3.95           | 0.00034 | 0.00273 | 3.91              | 0.78            | Psma1         |
| 1426480_at         | 3.95           | 0.00035 | 0.00274 | 9.24              | 0.63            | Sbds          |
| 1441328_at         | 3.95           | 0.00035 | 0.00277 | 5.92              | 0.91            | NA            |
| 1449051_at         | 3.95           | 0.00035 | 0.00277 | 6.34              | 1.26            | Ppara         |
| 1417355_at         | 3.95           | 0.00035 | 0.00278 | 10.68             | 1.16            | Peg3          |
| 1442063_at         | 3.93           | 0.00037 | 0.00288 | 5.73              | 0.96            | Adamts1       |
| 1439380_x_at       | 3.93           | 0.00037 | 0.00291 | 7.97              | 0.90            | Meg3          |
| 1433789_at         | 3.93           | 0.00037 | 0.00292 | 4.56              | 0.84            | Snhg3         |
| 1444447_at         | 3.92           | 0.00038 | 0.00292 | 4.29              | 0.83            | Nek7          |
| 1442901_at         | 3.92           | 0.00038 | 0.00293 | 3.36              | 0.67            | Tax1bp1       |
| 1437660_at         | 3.92           | 0.00038 | 0.00293 | 7.43              | 0.73            | Nktr          |
| 1435602_at         | 3.92           | 0.00038 | 0.00294 | 10.42             | 0.47            | NA            |
| 1424843_a_at       | 3.92           | 0.00038 | 0.00297 | 6.07              | 0.96            | Gas5          |
| 1458658_at         | 3.92           | 0.00038 | 0.00297 | 3.54              | 0.74            | NA            |
| 1435267_at         | 3.92           | 0.00038 | 0.00298 | 7.62              | 0.80            | A430108E01Rik |
| 1444231_at         | 3.91           | 0.00039 | 0.00299 | 4.48              | 0.84            | Zdhhc6        |
| 1435001_at         | 3.91           | 0.00039 | 0.00301 | 8.43              | 0.64            | Plaa          |
| 1437239_x_at       | 3.91           | 0.00039 | 0.00303 | 8.16              | 0.72            | Phc2          |

| Probe <sup>1</sup> | t <sup>2</sup> | p-value | q-value | Mean <sup>3</sup> | FC <sup>4</sup> | Symbol        |
|--------------------|----------------|---------|---------|-------------------|-----------------|---------------|
| 1437177_at         | 3.90           | 0.00040 | 0.00307 | 9.19              | 0.55            | Larp4         |
| 1455975_x_at       | 3.90           | 0.00040 | 0.00310 | 10.22             | 0.51            | Zfp313        |
| 1454654_at         | 3.90           | 0.00040 | 0.00310 | 10.00             | 0.51            | Dirc2         |
| 1434904_at         | 3.90           | 0.00040 | 0.00310 | 7.61              | 0.84            | Hivep2        |
| 1437647_at         | 3.90           | 0.00040 | 0.00310 | 4.13              | 0.76            | Dido1         |
| 1429359_s_at       | 3.90           | 0.00041 | 0.00312 | 6.83              | 0.78            | Rbpms         |
| 1419256_at         | 3.89           | 0.00041 | 0.00314 | 9.76              | 0.48            | Spnb2         |
| 1456609_at         | 3.89           | 0.00042 | 0.00317 | 6.75              | 0.78            | Camk2n1       |
| 1424527_at         | 3.89           | 0.00042 | 0.00318 | 8.77              | 0.56            | Ppp2r2d       |
| 1423757_x_at       | 3.89           | 0.00042 | 0.00319 | 6.57              | 0.88            | Igfbp4        |
| 1448949_at         | 3.89           | 0.00042 | 0.00319 | 8.16              | 1.02            | Car4          |
| 1453023_at         | 3.89           | 0.00042 | 0.00319 | 8.12              | 0.67            | 1110004O12Rik |
| 1433467_at         | 3.89           | 0.00042 | 0.00320 | 7.98              | 0.73            | Slc7a6        |
| 1457323_at         | 3.89           | 0.00042 | 0.00320 | 4.49              | 0.77            | C030030A07Rik |
| 1435990_at         | 3.89           | 0.00042 | 0.00320 | 3.80              | 0.78            | Adamts2       |
| 1444753_at         | 3.88           | 0.00042 | 0.00320 | 3.36              | 0.85            | Nek7          |
| 1443160_at         | 3.88           | 0.00042 | 0.00322 | 3.34              | 0.65            | Sbf2          |
| 1426826_at         | 3.88           | 0.00042 | 0.00322 | 9.12              | 0.58            | Rbm16         |
| 1428845_at         | 3.88           | 0.00043 | 0.00324 | 10.58             | 0.44            | Bclaf1        |
| 1443029_at         | 3.88           | 0.00043 | 0.00324 | 3.53              | 0.62            | Ppfibp1       |
| 1423663_at         | 3.88           | 0.00043 | 0.00325 | 8.85              | 0.56            | Flcn          |
| 1435198_at         | 3.87           | 0.00043 | 0.00328 | 6.91              | 0.78            | LOC545228     |
| 1415850_at         | 3.87           | 0.00044 | 0.00332 | 7.02              | 0.98            | Rasa3         |
| 1434510_at         | 3.87           | 0.00044 | 0.00334 | 6.75              | 1.05            | Papss2        |
| 1417067_s_at       | 3.86           | 0.00045 | 0.00338 | 10.06             | 0.51            | Cabc1         |
| 1417622_at         | 3.86           | 0.00045 | 0.00338 | 10.97             | 0.59            | Slc12a2       |
| 1434279_at         | 3.86           | 0.00045 | 0.00338 | 6.55              | 1.09            | Mtm1          |
| 1430615_at         | 3.86           | 0.00045 | 0.00338 | 6.08              | 1.02            | Ttll7         |
| 1442358_at         | 3.86           | 0.00045 | 0.00339 | 3.74              | 0.88            | AA409587      |
| 1431181_a_at       | 3.86           | 0.00046 | 0.00342 | 4.41              | 0.84            | Luc7l         |
| 1434401_at         | 3.86           | 0.00046 | 0.00343 | 7.82              | 0.69            | Zcchc2        |
| 1426445_at         | 3.85           | 0.00046 | 0.00344 | 9.56              | 0.51            | Ctage5        |
| 1459874_s_at       | 3.85           | 0.00046 | 0.00344 | 8.59              | 0.57            | Mtmr4         |
| 1458233_at         | 3.85           | 0.00046 | 0.00345 | 4.36              | 0.81            | Fryl          |
| 1458508_at         | 3.85           | 0.00046 | 0.00345 | 4.65              | 0.86            | Matr3         |
| 1436874_x_at       | 3.85           | 0.00046 | 0.00346 | 10.31             | 0.49            | Slc25a5       |
| 1452777_a_at       | 3.85           | 0.00047 | 0.00346 | 8.59              | 0.61            | Nub1          |
| 1418745_at         | 3.85           | 0.00047 | 0.00348 | 5.99              | 0.95            | Omd           |
| 1447187_at         | 3.84           | 0.00048 | 0.00353 | 4.47              | 0.80            | Ripk5         |
| 1456574_at         | 3.84           | 0.00048 | 0.00353 | 6.86              | 0.84            | NA            |
| 1437544_at         | 3.84           | 0.00048 | 0.00355 | 6.49              | 0.92            | Fubp1         |
| 1437667_a_at       | 3.84           | 0.00048 | 0.00356 | 5.99              | 1.47            | Bach2         |
| 1435075_at         | 3.84           | 0.00048 | 0.00357 | 6.92              | 0.76            | Tmem106b      |
| 1415723_at         | 3.84           | 0.00048 | 0.00358 | 11.12             | 0.47            | Eif5          |
| 1452345_at         | 3.83           | 0.00049 | 0.00361 | 12.02             | 0.49            | Lmod2         |
| 1441722_at         | 3.83           | 0.00049 | 0.00362 | 7.76              | 0.87            | Aatf          |
| 1423722_at         | 3.83           | 0.00049 | 0.00362 | 11.65             | 0.38            | Tmem49        |
| 1455310_at         | 3.83           | 0.00049 | 0.00362 | 7.09              | 0.81            | Rbm16         |
| 1420386_at         | 3.83           | 0.00049 | 0.00363 | 3.24              | 0.59            | Seh1l         |
| 1419764_at         | 3.83           | 0.00050 | 0.00365 | 4.61              | 1.83            | Chi3l3        |
| 1417111_at         | 3.83           | 0.00050 | 0.00365 | 9.42              | 0.61            | Man1a         |
| 1430047_at         | 3.83           | 0.00050 | 0.00366 | 8.06              | 0.79            | Brctd1        |
| 1430077_at         | 3.83           | 0.00050 | 0.00366 | 5.36              | 0.90            | Sfrs11        |

| Probe <sup>1</sup> | t <sup>2</sup> | p-value | q-value | Mean <sup>3</sup> | FC <sup>4</sup> | Symbol        |
|--------------------|----------------|---------|---------|-------------------|-----------------|---------------|
| 1433704_s_at       | 3.83           | 0.00050 | 0.00366 | 10.99             | 0.49            | Tloc1         |
| 1435698_at         | 3.83           | 0.00050 | 0.00366 | 9.07              | 0.61            | 4921505C17Rik |
| 1439931_at         | 3.83           | 0.00050 | 0.00366 | 5.03              | 0.88            | Gsk3b         |
| 1435902_at         | 3.82           | 0.00050 | 0.00366 | 7.15              | 0.75            | Nudt18        |
| 1455242_at         | 3.82           | 0.00050 | 0.00366 | 6.72              | 0.81            | Foxp1         |
| 1446297_at         | 3.82           | 0.00051 | 0.00370 | 3.99              | 0.73            | Hibadh        |
| 1423953_at         | 3.82           | 0.00051 | 0.00374 | 8.15              | 0.90            | Cdka1         |
| 1415840_at         | 3.81           | 0.00052 | 0.00377 | 8.79              | 0.58            | Elovl5        |
| 1454037_a_at       | 3.81           | 0.00052 | 0.00379 | 5.08              | 0.83            | Flt1          |
| 1428475_at         | 3.81           | 0.00052 | 0.00381 | 9.80              | 0.43            | 1190005P17Rik |
| 1425974_a_at       | 3.80           | 0.00053 | 0.00384 | 8.89              | 0.62            | Trim25        |
| 1422849_a_at       | 3.80           | 0.00053 | 0.00384 | 10.77             | 0.52            | Pabpn1        |
| 1449065_at         | 3.80           | 0.00054 | 0.00387 | 7.74              | 1.33            | Acot1         |
| 1450637_a_at       | 3.80           | 0.00054 | 0.00390 | 10.54             | 0.45            | Aebp1         |
| 1421103_at         | 3.80           | 0.00054 | 0.00390 | 7.11              | 0.81            | Bmp2k         |
| 1417816_s_at       | 3.80           | 0.00054 | 0.00390 | 6.78              | 0.75            | Serinc3       |
| 1438516_at         | 3.80           | 0.00054 | 0.00390 | 4.85              | 0.85            | Rif1          |
| 1427213_at         | 3.80           | 0.00054 | 0.00391 | 10.84             | 0.49            | Pfkfb1        |
| 1443332_at         | 3.79           | 0.00055 | 0.00392 | 4.79              | 0.98            | Slc12a2       |
| 1428562_at         | 3.79           | 0.00055 | 0.00395 | 10.20             | 0.65            | 2210403K04Rik |
| 1437633_at         | 3.79           | 0.00056 | 0.00402 | 9.19              | 0.56            | Ankrd11       |
| 1450162_at         | 3.78           | 0.00057 | 0.00404 | 5.15              | 0.88            | Dpf3          |
| 1444458_at         | 3.78           | 0.00057 | 0.00406 | 6.03              | 0.91            | Ctage5        |
| 1450117_at         | 3.78           | 0.00057 | 0.00407 | 4.50              | 0.73            | Tcf3          |
| 1447891_at         | 3.78           | 0.00057 | 0.00407 | 10.63             | 0.91            | Tacc2         |
| 1437211_x_at       | 3.78           | 0.00057 | 0.00408 | 7.57              | 0.76            | Elovl5        |
| 1427408_a_at       | 3.78           | 0.00058 | 0.00410 | 7.45              | 0.68            | Thrap3        |
| 1449519_at         | 3.77           | 0.00058 | 0.00412 | 10.69             | 0.78            | Gadd45a       |
| 1438928_x_at       | 3.77           | 0.00058 | 0.00413 | 8.29              | 0.84            | Ninj1         |
| 1452159_at         | 3.77           | 0.00058 | 0.00414 | 8.61              | 0.59            | 2310001A20Rik |
| 1448200_at         | 3.76           | 0.00060 | 0.00421 | 6.98              | 0.89            | Tcn2          |
| 1448425_at         | 3.76           | 0.00060 | 0.00423 | 11.83             | 0.39            | Eif3s10       |
| 1430328_at         | 3.76           | 0.00060 | 0.00425 | 3.29              | 0.60            | Polr3f        |
| 1458152_at         | 3.76           | 0.00061 | 0.00429 | 3.91              | 0.73            | Etfhdh        |
| 1434603_at         | 3.76           | 0.00061 | 0.00430 | 8.46              | 0.65            | Med13l        |
| 1425555_at         | 3.76           | 0.00061 | 0.00430 | 3.93              | 0.77            | Crkrs         |
| 1448130_at         | 3.76           | 0.00061 | 0.00430 | 10.27             | 0.57            | Fdft1         |
| 1453028_at         | 3.75           | 0.00061 | 0.00431 | 7.25              | 0.80            | Pwwp2a        |
| 1418822_a_at       | 3.75           | 0.00062 | 0.00434 | 10.12             | 0.45            | Arf6          |
| 1438427_at         | 3.75           | 0.00062 | 0.00434 | 6.41              | 0.84            | 4932442K08Rik |
| 1417867_at         | 3.75           | 0.00062 | 0.00435 | 12.73             | 1.06            | Cfd           |
| 1439496_at         | 3.75           | 0.00062 | 0.00435 | 7.40              | 0.79            | Ston1         |
| 1436108_at         | 3.75           | 0.00063 | 0.00436 | 3.75              | 0.66            | Txndc9        |
| 1426464_at         | 3.75           | 0.00063 | 0.00436 | 7.46              | 0.77            | Nr1d1         |
| 1450642_at         | 3.75           | 0.00063 | 0.00436 | 10.13             | 0.49            | 3110001I20Rik |
| 1437566_at         | 3.74           | 0.00063 | 0.00438 | 3.93              | 0.66            | Gnl2          |
| 1436044_at         | 3.74           | 0.00064 | 0.00443 | 8.59              | 0.77            | Scn7a         |
| 1423437_at         | 3.74           | 0.00064 | 0.00444 | 3.79              | 0.92            | Gsta3         |
| 1434191_at         | 3.74           | 0.00064 | 0.00445 | 8.72              | 0.75            | Tmem195       |
| 1434493_at         | 3.74           | 0.00065 | 0.00447 | 5.94              | 0.98            | 1810022K09Rik |
| 1451020_at         | 3.74           | 0.00065 | 0.00448 | 8.51              | 0.64            | Gsk3b         |
| 1437066_at         | 3.73           | 0.00065 | 0.00450 | 7.80              | 0.70            | Zbtb20        |
| 1437398_a_at       | 3.73           | 0.00065 | 0.00451 | 6.53              | 0.86            | Aldh9a1       |

| Probe <sup>1</sup> | t <sup>2</sup> | p-value | q-value | Mean <sup>3</sup> | FC <sup>4</sup> | Symbol        |
|--------------------|----------------|---------|---------|-------------------|-----------------|---------------|
| 1423324_at         | 3.73           | 0.00066 | 0.00455 | 10.33             | 0.43            | Pnn           |
| 1426655_a_at       | 3.73           | 0.00067 | 0.00458 | 7.38              | 0.80            | 4930504E06Rik |
| 1421657_a_at       | 3.72           | 0.00067 | 0.00461 | 4.12              | 0.74            | Sox17         |
| 1456153_at         | 3.72           | 0.00067 | 0.00462 | 9.70              | 0.61            | Ssh2          |
| 1449461_at         | 3.72           | 0.00068 | 0.00464 | 7.31              | 1.31            | Rbp7          |
| 1415941_s_at       | 3.72           | 0.00068 | 0.00466 | 6.89              | 0.76            | Zfand2a       |
| 1437075_at         | 3.72           | 0.00068 | 0.00466 | 3.07              | 0.55            | Frmd3         |
| 1448232_x_at       | 3.72           | 0.00068 | 0.00469 | 6.65              | 0.77            | Tuba1c        |
| 1437244_at         | 3.71           | 0.00069 | 0.00475 | 4.33              | 0.87            | Gas2l3        |
| 1460545_at         | 3.71           | 0.00070 | 0.00477 | 9.51              | 0.45            | Thrap3        |
| 1435744_at         | 3.71           | 0.00070 | 0.00479 | 4.71              | 0.78            | 6720401G13Rik |
| 1446860_at         | 3.71           | 0.00070 | 0.00480 | 4.98              | 0.92            | Gab2          |
| 1448079_at         | 3.70           | 0.00071 | 0.00483 | 4.19              | 0.71            | Rnf166        |
| 1439950_at         | 3.70           | 0.00072 | 0.00491 | 3.72              | 0.70            | Dync1h1       |
| 1435041_at         | 3.70           | 0.00072 | 0.00491 | 7.80              | 0.63            | Myl6          |
| 1439965_at         | 3.70           | 0.00072 | 0.00491 | 7.09              | 0.80            | NA            |
| 1426489_s_at       | 3.70           | 0.00073 | 0.00492 | 10.90             | 0.48            | Bfar          |
| 1438215_at         | 3.69           | 0.00073 | 0.00493 | 6.38              | 0.83            | Sfrs3         |
| 1415824_at         | 3.69           | 0.00073 | 0.00495 | 3.58              | 0.68            | Scd2          |
| 1458616_at         | 3.69           | 0.00074 | 0.00497 | 4.30              | 0.75            | B4galt1       |
| 1438688_at         | 3.69           | 0.00074 | 0.00497 | 11.16             | 0.47            | Srrm2         |
| 1430541_at         | 3.69           | 0.00074 | 0.00497 | 3.72              | 0.65            | Fbxo44        |
| 1420855_at         | 3.69           | 0.00074 | 0.00497 | 5.38              | 0.83            | Eln           |
| 1423169_at         | 3.69           | 0.00074 | 0.00497 | 5.91              | 1.01            | Taf7          |
| 1423355_at         | 3.69           | 0.00074 | 0.00497 | 6.40              | 0.78            | Snap29        |
| 1449578_at         | 3.68           | 0.00075 | 0.00502 | 7.30              | 0.83            | Supt16h       |
| 1434828_at         | 3.68           | 0.00075 | 0.00502 | 9.16              | 0.56            | B430201A12Rik |
| 1437119_at         | 3.68           | 0.00075 | 0.00503 | 8.87              | 0.60            | Ern1          |
| 1444701_at         | 3.68           | 0.00076 | 0.00506 | 3.64              | 0.66            | NA            |
| 1444371_at         | 3.68           | 0.00076 | 0.00507 | 4.30              | 0.75            | A630007B06Rik |
| 1418649_at         | 3.68           | 0.00076 | 0.00508 | 8.85              | 0.85            | Egln3         |
| 1426938_at         | 3.68           | 0.00076 | 0.00508 | 6.44              | 0.79            | Nova1         |
| 1455214_at         | 3.67           | 0.00077 | 0.00513 | 9.91              | 0.43            | Mitf          |
| 1437981_x_at       | 3.67           | 0.00078 | 0.00516 | 4.46              | 0.75            | 1110057K04Rik |
| 1426812_a_at       | 3.67           | 0.00078 | 0.00520 | 5.01              | 1.11            | 9130404D14Rik |
| 1438403_s_at       | 3.67           | 0.00079 | 0.00522 | 13.30             | 0.34            | Malat1        |
| 1435222_at         | 3.66           | 0.00079 | 0.00525 | 7.90              | 0.78            | Foxp1         |
| 1440719_at         | 3.66           | 0.00080 | 0.00526 | 5.32              | 0.88            | Gle1          |
| 1457825_x_at       | 3.66           | 0.00080 | 0.00530 | 8.84              | 0.67            | Tcn2          |
| 1437598_at         | 3.66           | 0.00081 | 0.00533 | 10.81             | 0.52            | Zbtb20        |
| 1416489_at         | 3.66           | 0.00081 | 0.00535 | 5.15              | 0.80            | Pi4k2b        |
| 1434801_x_at       | 3.66           | 0.00081 | 0.00535 | 9.48              | 0.49            | Slc25a5       |
| 1449040_a_at       | 3.66           | 0.00081 | 0.00535 | 9.41              | 0.45            | Sephs2        |
| 1434778_at         | 3.66           | 0.00081 | 0.00535 | 9.87              | 0.48            | Wapal         |
| 1419273_at         | 3.65           | 0.00082 | 0.00537 | 9.99              | 0.44            | C80913        |
| 1429914_at         | 3.65           | 0.00082 | 0.00540 | 5.57              | 1.00            | Epc1          |
| 1452660_s_at       | 3.65           | 0.00082 | 0.00540 | 11.02             | 0.44            | Klhl7         |
| 1447034_at         | 3.65           | 0.00082 | 0.00541 | 4.88              | 0.82            | Tnpo1         |
| 1438675_at         | 3.65           | 0.00083 | 0.00544 | 6.36              | 0.75            | Sfrs8         |
| 1431098_at         | 3.65           | 0.00083 | 0.00545 | 12.04             | 0.44            | Clip1         |
| 1432216_s_at       | 3.65           | 0.00083 | 0.00545 | 4.62              | 0.72            | Mpp7          |
| 1459843_s_at       | 3.64           | 0.00084 | 0.00549 | 10.26             | 0.49            | Smad1         |
| 1420481_at         | 3.64           | 0.00084 | 0.00550 | 6.40              | 0.83            | Cnnm3         |



| Probe <sup>1</sup> | t <sup>2</sup> | p-value | q-value | Mean <sup>3</sup> | FC <sup>4</sup> | Symbol        |
|--------------------|----------------|---------|---------|-------------------|-----------------|---------------|
| 1449851_at         | 3.64           | 0.00084 | 0.00550 | 7.51              | 0.80            | Per1          |
| 1442018_at         | 3.64           | 0.00085 | 0.00552 | 3.41              | 0.59            | AI426953      |
| 1428332_at         | 3.64           | 0.00085 | 0.00553 | 10.04             | 0.57            | Pik3ip1       |
| 1443870_at         | 3.64           | 0.00085 | 0.00556 | 9.18              | 0.54            | Abcc4         |
| 1452330_a_at       | 3.64           | 0.00085 | 0.00556 | 8.75              | 0.54            | Mxra8         |
| 1455352_at         | 3.64           | 0.00086 | 0.00558 | 8.55              | 0.55            | NA            |
| 1438677_at         | 3.63           | 0.00086 | 0.00560 | 5.39              | 0.83            | Pkp4          |
| 1425338_at         | 3.63           | 0.00086 | 0.00561 | 5.29              | 0.87            | Plcb4         |
| 1420326_s_at       | 3.63           | 0.00087 | 0.00565 | 8.84              | 0.54            | Cramp1l       |
| 1427202_at         | 3.63           | 0.00088 | 0.00569 | 8.85              | 0.52            | 4833442J19Rik |
| 1455094_s_at       | 3.63           | 0.00088 | 0.00572 | 10.22             | 0.49            | Ube2g1        |
| 1423143_at         | 3.62           | 0.00089 | 0.00574 | 9.97              | 0.42            | Gtpbp4        |
| 1428094_at         | 3.62           | 0.00089 | 0.00577 | 12.02             | 0.37            | Lamp2         |
| 1420973_at         | 3.62           | 0.00090 | 0.00578 | 7.98              | 0.73            | Arid5b        |
| 1417250_at         | 3.62           | 0.00090 | 0.00579 | 7.67              | 0.73            | Rnf12         |
| 1444016_at         | 3.62           | 0.00090 | 0.00581 | 3.76              | 0.61            | Anxa1         |
| 1429215_at         | 3.62           | 0.00090 | 0.00581 | 5.69              | 0.87            | 2310058N22Rik |
| 1452720_a_at       | 3.62           | 0.00091 | 0.00585 | 8.26              | 0.55            | Fip1l1        |
| 1420609_at         | 3.61           | 0.00091 | 0.00587 | 11.80             | 0.40            | Mar-07        |
| 1423684_at         | 3.61           | 0.00091 | 0.00587 | 11.24             | 0.44            | Hnrpk         |
| 1457063_at         | 3.61           | 0.00092 | 0.00589 | 3.46              | 0.64            | Abi3          |
| 1425022_at         | 3.61           | 0.00092 | 0.00589 | 8.22              | 0.73            | Usp3          |
| 1417629_at         | 3.61           | 0.00092 | 0.00593 | 6.00              | 0.80            | Prodh         |
| 1434432_at         | 3.61           | 0.00093 | 0.00594 | 9.20              | 0.57            | Rffl          |
| 1452478_at         | 3.61           | 0.00093 | 0.00594 | 9.43              | 0.63            | Alpk2         |
| 1436983_at         | 3.61           | 0.00094 | 0.00598 | 9.95              | 0.44            | Crebbp        |
| 1460147_at         | 3.61           | 0.00094 | 0.00598 | 7.95              | 0.67            | A730009E18Rik |
| 1457147_at         | 3.60           | 0.00094 | 0.00599 | 7.18              | 0.81            | Etl4          |
| 1428273_at         | 3.60           | 0.00094 | 0.00601 | 6.41              | 0.84            | Abhd13        |
| 1427134_at         | 3.60           | 0.00095 | 0.00603 | 8.89              | 0.51            | Sfrs12        |
| 1419705_at         | 3.60           | 0.00095 | 0.00604 | 4.46              | 1.13            | Car5b         |
| 1456112_at         | 3.60           | 0.00096 | 0.00609 | 9.29              | 0.53            | Tpr           |
| 1429017_at         | 3.60           | 0.00096 | 0.00611 | 7.73              | 0.68            | Smcr8         |
| 1434178_at         | 3.59           | 0.00097 | 0.00618 | 9.24              | 0.50            | Mil3          |
| 1451276_at         | 3.59           | 0.00098 | 0.00620 | 6.83              | 0.92            | Uhrf1bp1l     |
| 1425177_at         | 3.59           | 0.00098 | 0.00620 | 6.42              | 0.98            | Shmt1         |
| 1429545_at         | 3.59           | 0.00098 | 0.00621 | 3.68              | 0.69            | Ube2i         |
| 1453265_at         | 3.59           | 0.00098 | 0.00622 | 4.29              | 0.82            | 4930579C15Rik |
| 1452193_a_at       | 3.59           | 0.00099 | 0.00624 | 9.45              | 0.41            | Wasl          |
| 1456727_a_at       | 3.58           | 0.00100 | 0.00627 | 9.02              | 0.55            | Csnk1d        |
| 1421545_a_at       | 3.58           | 0.00100 | 0.00630 | 7.58              | 0.70            | Syne1         |
| 1428968_at         | 3.58           | 0.00101 | 0.00632 | 6.18              | 0.71            | Cep57         |
| 1436550_at         | 3.58           | 0.00101 | 0.00634 | 8.86              | 0.61            | Fbxo30        |
| 1430576_at         | 3.58           | 0.00101 | 0.00634 | 5.13              | 0.84            | Tpp2          |
| 1436067_at         | 3.58           | 0.00101 | 0.00634 | 6.43              | 0.77            | Zbtb10        |
| 1418888_a_at       | 3.58           | 0.00102 | 0.00637 | 10.90             | 0.47            | Sepx1         |
| 1431292_a_at       | 3.58           | 0.00102 | 0.00638 | 11.41             | 0.44            | Twf2          |
| 1452441_at         | 3.58           | 0.00102 | 0.00638 | 5.35              | 0.73            | Phf3          |
| 1448318_at         | 3.57           | 0.00102 | 0.00639 | 9.24              | 0.95            | Adfp          |
| 1444982_at         | 3.57           | 0.00103 | 0.00640 | 4.38              | 0.87            | Rhoj          |
| 1426777_a_at       | 3.57           | 0.00103 | 0.00644 | 7.39              | 0.70            | Wasl          |
| 1436323_at         | 3.57           | 0.00104 | 0.00646 | 6.81              | 0.68            | 2810001A02Rik |
| 1424544_at         | 3.57           | 0.00104 | 0.00647 | 4.05              | 0.67            | Nrbp2         |

| Probe <sup>1</sup> | t <sup>2</sup> | p-value | q-value | Mean <sup>3</sup> | FC <sup>4</sup> | Symbol        |
|--------------------|----------------|---------|---------|-------------------|-----------------|---------------|
| 1440806_x_at       | 3.57           | 0.00104 | 0.00648 | 6.48              | 0.82            | 5730526G10Rik |
| 1419758_at         | 3.57           | 0.00104 | 0.00648 | 7.60              | 0.69            | Abcb1a        |
| 1431023_at         | 3.56           | 0.00105 | 0.00653 | 4.97              | 0.76            | C030046E11Rik |
| 1436043_at         | 3.56           | 0.00106 | 0.00659 | 8.67              | 0.64            | Scn7a         |
| 1416083_at         | 3.56           | 0.00106 | 0.00659 | 13.52             | 0.43            | Zfand5        |
| 1460084_at         | 3.56           | 0.00107 | 0.00660 | 3.65              | 0.63            | NA            |
| 1418192_at         | 3.56           | 0.00107 | 0.00660 | 7.34              | 0.73            | Mnt           |
| 1426858_at         | 3.56           | 0.00107 | 0.00660 | 6.37              | 1.00            | Inhbb         |
| 1425021_a_at       | 3.56           | 0.00107 | 0.00660 | 7.42              | 0.65            | Pex16         |
| 1459431_at         | 3.56           | 0.00107 | 0.00662 | 3.95              | 0.69            | Nfia          |
| 1436362_x_at       | 3.56           | 0.00108 | 0.00663 | 9.84              | 0.49            | 2700079J08Rik |
| 1436713_s_at       | 3.56           | 0.00108 | 0.00663 | 4.20              | 0.76            | Meg3          |
| 1416255_at         | 3.56           | 0.00108 | 0.00663 | 3.27              | 0.57            | Gja4          |
| 1454080_at         | 3.56           | 0.00108 | 0.00663 | 6.08              | 0.79            | Klhdc6        |
| 1456395_at         | 3.55           | 0.00108 | 0.00667 | 8.24              | 0.92            | Ppargc1a      |
| 1427052_at         | 3.55           | 0.00110 | 0.00676 | 11.28             | 0.48            | Acacb         |
| 1429100_at         | 3.55           | 0.00111 | 0.00680 | 5.73              | 0.78            | 2010109K11Rik |
| 1451244_a_at       | 3.54           | 0.00111 | 0.00681 | 7.90              | 0.69            | Zfp422        |
| 1460578_at         | 3.54           | 0.00112 | 0.00685 | 7.56              | 0.71            | Fgd5          |
| 1417768_at         | 3.54           | 0.00112 | 0.00687 | 12.15             | 0.38            | Pnpla8        |
| 1452036_a_at       | 3.54           | 0.00112 | 0.00687 | 10.65             | 0.52            | Tmpo          |
| 1457288_at         | 3.54           | 0.00112 | 0.00687 | 3.94              | 0.64            | Ank3          |
| 1450011_at         | 3.54           | 0.00114 | 0.00693 | 8.98              | 0.67            | Hsd17b12      |
| 1443235_at         | 3.54           | 0.00114 | 0.00693 | 4.11              | 0.69            | Eif2ak4       |
| 1420919_at         | 3.54           | 0.00114 | 0.00694 | 7.78              | 0.59            | Sgk3          |
| 1444057_at         | 3.53           | 0.00115 | 0.00695 | 5.75              | 0.82            | Ubx2          |
| 1450772_at         | 3.53           | 0.00115 | 0.00699 | 4.39              | 0.83            | Wnt11         |
| 1437343_x_at       | 3.53           | 0.00115 | 0.00699 | 7.97              | 0.65            | Atad3a        |
| 1460241_a_at       | 3.53           | 0.00116 | 0.00701 | 8.26              | 0.55            | St3gal5       |
| 1423091_a_at       | 3.53           | 0.00116 | 0.00701 | 7.16              | 0.74            | Gpm6b         |
| 1453570_x_at       | 3.53           | 0.00116 | 0.00701 | 5.11              | 0.73            | Bet1l         |
| 1455493_at         | 3.53           | 0.00116 | 0.00703 | 9.33              | 0.50            | Syne1         |
| 1417213_a_at       | 3.53           | 0.00117 | 0.00703 | 8.37              | 0.55            | Rbm6          |
| 1450857_a_at       | 3.53           | 0.00117 | 0.00705 | 9.95              | 0.43            | Col1a2        |
| 1435778_at         | 3.52           | 0.00117 | 0.00707 | 9.75              | 0.46            | Ankrd11       |
| 1424666_at         | 3.52           | 0.00118 | 0.00711 | 8.07              | 0.64            | Gpatch8       |
| 1440347_at         | 3.52           | 0.00118 | 0.00712 | 4.83              | 0.71            | Arhgap10      |
| 1441912_x_at       | 3.52           | 0.00119 | 0.00716 | 5.83              | 0.96            | C2            |
| 1415940_at         | 3.52           | 0.00119 | 0.00718 | 8.10              | 0.67            | Zfand2a       |
| 1433769_at         | 3.52           | 0.00120 | 0.00719 | 5.11              | 0.80            | Als2cl        |
| 1444114_at         | 3.52           | 0.00120 | 0.00720 | 5.47              | 0.84            | Mkln1         |
| 1416344_at         | 3.52           | 0.00120 | 0.00721 | 9.55              | 0.48            | Lamp2         |
| 1426060_at         | 3.52           | 0.00120 | 0.00721 | 7.24              | 0.94            | NA            |
| 1423166_at         | 3.52           | 0.00121 | 0.00721 | 12.03             | 0.44            | Cd36          |
| 1416801_at         | 3.51           | 0.00121 | 0.00723 | 6.14              | 0.82            | Trpm7         |
| 1425241_a_at       | 3.51           | 0.00122 | 0.00725 | 7.72              | 0.67            | Wsb1          |
| 1449679_s_at       | 3.51           | 0.00122 | 0.00726 | 9.08              | 0.50            | Stx5a         |
| 1426084_a_at       | 3.51           | 0.00122 | 0.00727 | 8.69              | 0.52            | Tor1aip1      |
| 1423674_at         | 3.51           | 0.00123 | 0.00730 | 6.76              | 0.75            | Usp1          |
| 1456621_at         | 3.51           | 0.00123 | 0.00731 | 5.88              | 0.90            | D430015B01Rik |
| 1429504_at         | 3.51           | 0.00124 | 0.00733 | 7.86              | 0.82            | Rnpc3         |
| 1435771_at         | 3.51           | 0.00124 | 0.00734 | 9.38              | 0.46            | Plcb4         |
| 1453740_a_at       | 3.51           | 0.00124 | 0.00734 | 7.73              | 0.69            | Ccnl2         |

| Probe <sup>1</sup> | t <sup>2</sup> | p-value | q-value | Mean <sup>3</sup> | FC <sup>4</sup> | Symbol        |
|--------------------|----------------|---------|---------|-------------------|-----------------|---------------|
| 1436023_at         | 3.51           | 0.00124 | 0.00734 | 8.93              | 0.52            | Bclaf1        |
| 1439278_at         | 3.50           | 0.00124 | 0.00735 | 8.98              | 0.54            | Zbtb20        |
| 1438278_a_at       | 3.50           | 0.00125 | 0.00735 | 7.75              | 0.66            | BC003993      |
| 1422848_a_at       | 3.50           | 0.00125 | 0.00737 | 9.70              | 0.46            | Pabpn1        |
| 1457765_at         | 3.50           | 0.00126 | 0.00740 | 5.11              | 0.83            | Psmd14        |
| 1421879_at         | 3.50           | 0.00126 | 0.00741 | 7.64              | 0.69            | Mtmr1         |
| 1448385_at         | 3.50           | 0.00126 | 0.00741 | 7.40              | 0.69            | Slc15a4       |
| 1454943_a_at       | 3.50           | 0.00126 | 0.00742 | 4.49              | 0.74            | Paxip1        |
| 1456879_at         | 3.50           | 0.00127 | 0.00747 | 6.93              | 0.73            | C130022K22Rik |
| 1429313_at         | 3.49           | 0.00128 | 0.00748 | 4.21              | 0.66            | Ror1          |
| 1449416_at         | 3.49           | 0.00129 | 0.00750 | 7.27              | 0.81            | Fzd4          |
| 1424405_at         | 3.49           | 0.00129 | 0.00750 | 7.11              | 0.74            | Mbip          |
| 1435370_a_at       | 3.49           | 0.00130 | 0.00756 | 11.80             | 0.54            | Ces3          |
| 1427887_at         | 3.49           | 0.00130 | 0.00757 | 8.90              | 0.53            | 2610304G08Rik |
| 1425282_at         | 3.49           | 0.00131 | 0.00763 | 3.70              | 0.78            | Rnf144b       |
| 1433668_at         | 3.48           | 0.00132 | 0.00764 | 12.44             | 0.47            | Pnrc1         |
| 1438739_at         | 3.48           | 0.00132 | 0.00764 | 8.80              | 0.52            | Cnbp          |
| 1453128_at         | 3.48           | 0.00132 | 0.00766 | 4.89              | 0.95            | Lyve1         |
| 1444695_at         | 3.48           | 0.00132 | 0.00768 | 3.96              | 0.68            | NA            |
| 1447928_at         | 3.48           | 0.00133 | 0.00769 | 5.14              | 1.17            | Car5b         |
| 1416451_s_at       | 3.48           | 0.00133 | 0.00769 | 6.12              | 0.84            | Taf8          |
| 1444677_at         | 3.48           | 0.00133 | 0.00770 | 4.72              | 0.74            | C77673        |
| 1443969_at         | 3.48           | 0.00133 | 0.00770 | 4.19              | 0.77            | Irs2          |
| 1456365_at         | 3.48           | 0.00134 | 0.00774 | 7.51              | 0.64            | LOC629750     |
| 1422980_a_at       | 3.48           | 0.00134 | 0.00774 | 5.86              | 0.79            | Bet1l         |
| 1432176_a_at       | 3.48           | 0.00134 | 0.00774 | 6.94              | 0.68            | Eng           |
| 1456502_at         | 3.47           | 0.00135 | 0.00778 | 5.93              | 0.85            | Dyrk2         |
| 1417321_at         | 3.47           | 0.00136 | 0.00783 | 10.02             | 0.41            | Zcchc7        |
| 1456489_at         | 3.47           | 0.00136 | 0.00783 | 7.35              | 0.67            | Pcf11         |
| 1424155_at         | 3.47           | 0.00137 | 0.00784 | 8.14              | 1.07            | Fabp4         |
| 1437468_x_at       | 3.47           | 0.00138 | 0.00788 | 12.25             | 0.35            | Fbxw11        |
| 1419088_at         | 3.46           | 0.00139 | 0.00796 | 6.77              | 0.82            | Timp3         |
| 1417356_at         | 3.46           | 0.00139 | 0.00796 | 7.38              | 1.34            | Peg3          |
| 1429211_at         | 3.46           | 0.00139 | 0.00796 | 3.46              | 0.77            | 2900078E11Rik |
| 1435434_at         | 3.46           | 0.00141 | 0.00804 | 6.00              | 0.79            | Braf          |
| 1436545_at         | 3.46           | 0.00142 | 0.00806 | 6.10              | 0.78            | Dtx4          |
| 1423251_at         | 3.46           | 0.00142 | 0.00807 | 10.72             | 0.49            | Luc7l2        |
| 1428047_s_at       | 3.46           | 0.00143 | 0.00810 | 4.90              | 0.72            | Zfx           |
| 1437065_at         | 3.45           | 0.00143 | 0.00812 | 8.56              | 0.59            | Zbtb20        |
| 1448802_at         | 3.45           | 0.00145 | 0.00822 | 8.08              | 0.67            | Nufip1        |
| 1429822_at         | 3.45           | 0.00145 | 0.00823 | 7.01              | 0.77            | 4633401B06Rik |
| 1456875_at         | 3.45           | 0.00145 | 0.00823 | 7.69              | 0.75            | 1810013L24Rik |
| 1431044_at         | 3.45           | 0.00146 | 0.00825 | 3.39              | 0.57            | Thoc1         |
| 1417109_at         | 3.44           | 0.00147 | 0.00831 | 6.21              | 0.93            | Tinagl        |
| 1422997_s_at       | 3.44           | 0.00148 | 0.00832 | 8.35              | 1.06            | Acot2         |
| 1442176_at         | 3.44           | 0.00148 | 0.00832 | 3.74              | 0.69            | Arid5b        |
| 1448937_at         | 3.44           | 0.00148 | 0.00834 | 6.52              | 0.78            | Slc35b3       |
| 1425562_s_at       | 3.44           | 0.00149 | 0.00837 | 9.10              | 0.46            | Trnt1         |
| 1441285_at         | 3.44           | 0.00149 | 0.00837 | 5.27              | 0.92            | 4833426J09Rik |
| 1423858_a_at       | 3.44           | 0.00149 | 0.00838 | 6.09              | 1.26            | Hmgcs2        |
| 1422785_at         | 3.44           | 0.00149 | 0.00838 | 5.27              | 0.75            | Rasa2         |
| 1437042_at         | 3.44           | 0.00150 | 0.00840 | 8.75              | 0.57            | Arnt          |
| 1419039_at         | 3.44           | 0.00150 | 0.00840 | 5.86              | 0.88            | Cyp2d22       |

| Probe <sup>1</sup> | t <sup>2</sup> | p-value | q-value | Mean <sup>3</sup> | FC <sup>4</sup> | Symbol        |
|--------------------|----------------|---------|---------|-------------------|-----------------|---------------|
| 1458042_at         | 3.44           | 0.00151 | 0.00842 | 2.89              | 0.63            | NA            |
| 1450644_at         | 3.43           | 0.00151 | 0.00844 | 10.64             | 0.53            | Zfp3611       |
| 1422901_at         | 3.43           | 0.00151 | 0.00845 | 7.39              | 0.63            | Mgea5         |
| 1448388_a_at       | 3.43           | 0.00152 | 0.00846 | 10.57             | 0.37            | 1110002B05Rik |
| 1446519_at         | 3.43           | 0.00152 | 0.00846 | 3.72              | 0.57            | A730091E23Rik |
| 1427235_at         | 3.43           | 0.00152 | 0.00846 | 9.24              | 0.53            | Utx           |
| 1446303_at         | 3.43           | 0.00153 | 0.00852 | 3.81              | 0.63            | Igf1r         |
| 1458710_at         | 3.43           | 0.00153 | 0.00852 | 5.21              | 0.79            | Polr2a        |
| 1416791_a_at       | 3.43           | 0.00154 | 0.00855 | 8.68              | 0.52            | Nxf1          |
| 1453217_at         | 3.43           | 0.00154 | 0.00858 | 4.09              | 0.78            | 4930527E24Rik |
| 1419954_s_at       | 3.43           | 0.00155 | 0.00859 | 8.88              | 0.49            | Zfand3        |
| 1448789_at         | 3.43           | 0.00155 | 0.00860 | 5.21              | 0.83            | Aldh1a3       |
| 1433913_at         | 3.43           | 0.00155 | 0.00860 | 9.03              | 0.48            | C80913        |
| 1456042_s_at       | 3.42           | 0.00155 | 0.00861 | 6.93              | 0.69            | Cramp1l       |
| 1418350_at         | 3.42           | 0.00156 | 0.00862 | 6.20              | 0.75            | Hbegf         |
| 1450987_a_at       | 3.42           | 0.00156 | 0.00863 | 7.56              | 0.65            | 2310004I24Rik |
| 1433694_at         | 3.42           | 0.00156 | 0.00863 | 9.90              | 1.09            | Pde3b         |
| 1458962_at         | 3.42           | 0.00156 | 0.00864 | 5.31              | 0.80            | Rnf103        |
| 1425362_at         | 3.42           | 0.00157 | 0.00865 | 3.15              | 0.67            | Hrbl          |
| 1415796_at         | 3.42           | 0.00157 | 0.00867 | 11.54             | 0.36            | Dazap2        |
| 1433757_a_at       | 3.42           | 0.00157 | 0.00867 | 8.66              | 0.53            | Nisch         |
| 1418069_at         | 3.42           | 0.00157 | 0.00867 | 3.60              | 0.77            | Apoc2         |
| 1420089_at         | 3.42           | 0.00157 | 0.00867 | 5.10              | 0.86            | Nfkbia        |
| 1434758_at         | 3.42           | 0.00157 | 0.00867 | 6.53              | 0.78            | Crispld2      |
| 1452183_a_at       | 3.42           | 0.00159 | 0.00873 | 6.14              | 1.22            | Meg3          |
| 1436058_at         | 3.42           | 0.00159 | 0.00874 | 6.98              | 0.88            | Rsad2         |
| 1460726_at         | 3.41           | 0.00162 | 0.00887 | 7.72              | 0.57            | Adss          |
| 1451144_at         | 3.41           | 0.00162 | 0.00888 | 9.44              | 0.43            | Bxdc2         |
| 1423577_at         | 3.41           | 0.00163 | 0.00891 | 9.03              | 0.56            | Ankrd32       |
| 1455729_at         | 3.41           | 0.00163 | 0.00892 | 7.89              | 0.58            | Gnaq          |
| 1440455_at         | 3.40           | 0.00164 | 0.00896 | 3.06              | 0.54            | NA            |
| 1419735_at         | 3.40           | 0.00166 | 0.00902 | 3.76              | 0.86            | Csn3          |
| 1426808_at         | 3.40           | 0.00167 | 0.00907 | 9.40              | 0.80            | Lgals3        |
| 1422842_at         | 3.40           | 0.00168 | 0.00912 | 8.52              | 0.54            | Xrn2          |
| 1421009_at         | 3.40           | 0.00168 | 0.00913 | 4.85              | 0.94            | Rsad2         |
| 1434013_at         | 3.40           | 0.00168 | 0.00913 | 6.75              | 0.69            | Ablim3        |
| 1446068_at         | 3.39           | 0.00169 | 0.00917 | 5.10              | 0.76            | Adk           |
| 1439097_at         | 3.39           | 0.00170 | 0.00920 | 4.13              | 0.77            | D10Wsu52e     |
| 1456080_a_at       | 3.39           | 0.00170 | 0.00920 | 10.40             | 0.49            | Serinc3       |
| 1434985_a_at       | 3.39           | 0.00170 | 0.00920 | 11.23             | 0.43            | Eif4a1        |
| 1450983_at         | 3.39           | 0.00170 | 0.00920 | 8.21              | 0.58            | Akap8         |
| 1445328_at         | 3.39           | 0.00171 | 0.00924 | 3.52              | 0.56            | Col4a4        |
| 1422660_at         | 3.39           | 0.00172 | 0.00929 | 11.84             | 0.36            | NA            |
| 1426788_a_at       | 3.39           | 0.00172 | 0.00931 | 8.47              | 0.57            | Ssrp1         |
| 1423191_at         | 3.39           | 0.00173 | 0.00934 | 6.71              | 0.72            | Fnbp4         |
| 1435477_s_at       | 3.38           | 0.00173 | 0.00934 | 8.31              | 0.95            | Fcgr2b        |
| 1436836_x_at       | 3.38           | 0.00173 | 0.00934 | 10.72             | 0.40            | Cnn3          |
| 1442971_at         | 3.38           | 0.00174 | 0.00935 | 3.29              | 0.55            | Baz2b         |
| 1457988_at         | 3.38           | 0.00174 | 0.00935 | 4.05              | 0.71            | Sec63         |
| 1448990_a_at       | 3.38           | 0.00175 | 0.00939 | 4.88              | 0.74            | Myo1b         |
| 1456563_at         | 3.38           | 0.00175 | 0.00940 | 4.90              | 0.82            | 4933429F08Rik |
| 1421118_a_at       | 3.38           | 0.00175 | 0.00941 | 5.10              | 0.73            | Gpr56         |
| 1437277_x_at       | 3.38           | 0.00176 | 0.00944 | 10.35             | 0.44            | Tgm2          |

| Probe <sup>1</sup> | t <sup>2</sup> | p-value | q-value | Mean <sup>3</sup> | FC <sup>4</sup> | Symbol        |
|--------------------|----------------|---------|---------|-------------------|-----------------|---------------|
| 1453040_at         | 3.38           | 0.00177 | 0.00948 | 3.85              | 0.66            | Mcart6        |
| 1430581_at         | 3.38           | 0.00177 | 0.00948 | 3.51              | 0.73            | Bclaf1        |
| 1460710_at         | 3.38           | 0.00177 | 0.00948 | 3.85              | 0.63            | Adora2a       |
| 1420977_at         | 3.37           | 0.00178 | 0.00950 | 5.58              | 0.76            | Man1a2        |
| 1455317_at         | 3.37           | 0.00178 | 0.00952 | 10.39             | 0.42            | Epc2          |
| 1448557_at         | 3.37           | 0.00180 | 0.00957 | 9.04              | 0.58            | 1200015N20Rik |
| 1456120_at         | 3.37           | 0.00180 | 0.00957 | 7.55              | 0.67            | 3110001I20Rik |
| 1458526_at         | 3.37           | 0.00180 | 0.00960 | 3.62              | 0.61            | NA            |
| 1455967_at         | 3.37           | 0.00183 | 0.00970 | 6.09              | 0.82            | Sorbs1        |
| 1456505_at         | 3.37           | 0.00183 | 0.00970 | 4.71              | 0.71            | Braf          |
| 1459885_s_at       | 3.36           | 0.00183 | 0.00973 | 5.22              | 0.87            | Cox7c         |
| 1425546_a_at       | 3.36           | 0.00183 | 0.00973 | 10.20             | 1.14            | Trf           |
| 1454880_s_at       | 3.36           | 0.00184 | 0.00975 | 5.90              | 0.76            | Bmf           |
| 1438862_at         | 3.36           | 0.00184 | 0.00975 | 3.57              | 0.86            | A630005I04Rik |
| 1424481_s_at       | 3.36           | 0.00184 | 0.00976 | 5.58              | 0.80            | Armcx5        |
| 1425060_s_at       | 3.36           | 0.00185 | 0.00980 | 11.92             | 0.41            | Clip1         |
| 1443521_at         | 3.36           | 0.00186 | 0.00984 | 4.63              | 0.76            | Ggnbp2        |
| 1455643_s_at       | 3.36           | 0.00186 | 0.00984 | 10.44             | 0.43            | Tsr1          |
| 1449322_at         | 3.36           | 0.00186 | 0.00984 | 12.10             | 0.37            | Ptp4a1        |
| 1433266_at         | 3.36           | 0.00187 | 0.00986 | 4.13              | 0.79            | 2810416A17Rik |
| 1447842_x_at       | 3.36           | 0.00187 | 0.00986 | 9.40              | 0.45            | Tcn2          |
| 1420509_at         | 3.35           | 0.00188 | 0.00991 | 8.24              | 0.56            | Srfbp1        |
| 1428091_at         | 3.35           | 0.00189 | 0.00993 | 10.33             | 0.42            | Klhl7         |
| 1438000_x_at       | 3.35           | 0.00189 | 0.00993 | 10.61             | 0.40            | Zfp622        |
| 1419100_at         | 3.35           | 0.00189 | 0.00994 | 6.27              | 1.01            | Serpina3n     |
| 1433023_at         | 3.35           | 0.00190 | 0.00998 | 6.99              | 0.80            | 2310068G24Rik |
| 1452905_at         | 3.35           | 0.00190 | 0.01000 | 5.13              | 0.88            | Meg3          |

**Table S3a. Footnote**

Gene lists were generated using the Cyber-T method, with only genes with a *q*-value < 0.01 presented.

<sup>1</sup> *Probe* represents the Affymetrix probe set identifier.

<sup>2</sup> *t* represents the t-statistic output from the Cyber-T method.

<sup>3</sup> *Mean* represents the mean expression signal after normalization.

<sup>4</sup> *FC* represents the log<sub>2</sub> fold change in normalized signals.

**Table S3b.** Genes downregulated in muscle of *S6K*<sup>-/-</sup> mice compared to wild type mice.

| Probe <sup>1</sup> | t <sup>2</sup> | p-value  | q-value  | Mean <sup>3</sup> | FC <sup>4</sup> | Symbol        |
|--------------------|----------------|----------|----------|-------------------|-----------------|---------------|
| 1438553_x_at       | -11.82         | 5.94E-14 | 6.67E-11 | 5.74              | 3.29            | NA            |
| 1460705_at         | -10.20         | 3.66E-12 | 2.02E-09 | 7.51              | 2.34            | Rps6kb1       |
| 1433296_at         | -10.02         | 5.96E-12 | 3.12E-09 | 6.56              | 3.86            | 2310045N14Rik |
| 1440435_at         | -9.24          | 4.96E-11 | 1.37E-08 | 7.12              | 3.34            | Ky            |
| 1447870_x_at       | -9.23          | 5.07E-11 | 1.37E-08 | 11.20             | 1.46            | 1110002E22Rik |
| 1432001_at         | -9.16          | 6.14E-11 | 1.49E-08 | 10.44             | 3.07            | Zmynd17       |
| 1435585_at         | -8.88          | 1.33E-10 | 2.28E-08 | 9.84              | 1.59            | Tceal7        |
| 1457894_at         | -8.74          | 1.98E-10 | 3.09E-08 | 9.26              | 1.58            | NA            |
| 1421818_at         | -8.31          | 6.85E-10 | 8.12E-08 | 9.92              | 1.17            | Bcl6          |
| 1456084_x_at       | -8.20          | 9.49E-10 | 1.07E-07 | 9.06              | 2.13            | Fmod          |
| 1430786_at         | -8.18          | 9.84E-10 | 1.10E-07 | 8.93              | 1.58            | 1110002E22Rik |
| 1428487_s_at       | -8.12          | 1.17E-09 | 1.23E-07 | 6.85              | 1.88            | Coq10b        |
| 1420991_at         | -7.83          | 2.72E-09 | 2.36E-07 | 7.95              | 3.08            | Ankrd1        |
| 1430523_s_at       | -7.78          | 3.22E-09 | 2.75E-07 | 4.45              | 2.46            | Igl-V1        |
| 1418174_at         | -7.73          | 3.74E-09 | 3.10E-07 | 6.90              | 3.02            | Dbp           |
| 1445420_at         | -7.62          | 5.15E-09 | 4.06E-07 | 6.28              | 1.79            | Mef2c         |
| 1434369_a_at       | -7.51          | 7.08E-09 | 5.17E-07 | 14.68             | 0.54            | Cryab         |
| 1417575_at         | -7.50          | 7.25E-09 | 5.21E-07 | 5.91              | 2.34            | Otub2         |
| 1448595_a_at       | -7.42          | 9.28E-09 | 6.43E-07 | 12.05             | 0.98            | Bex1          |
| 1453898_at         | -7.40          | 9.87E-09 | 6.73E-07 | 6.68              | 3.05            | Itgb1bp3      |
| 1420992_at         | -7.39          | 1.01E-08 | 6.87E-07 | 8.40              | 2.85            | Ankrd1        |
| 1454956_at         | -7.27          | 1.48E-08 | 9.29E-07 | 7.41              | 1.68            | Rps6kb1       |
| 1423807_a_at       | -7.23          | 1.63E-08 | 1.01E-06 | 12.46             | 0.89            | Calm2         |
| 1424852_at         | -7.15          | 2.08E-08 | 1.24E-06 | 12.63             | 0.81            | Mef2c         |
| 1450961_a_at       | -7.14          | 2.14E-08 | 1.26E-06 | 7.20              | 1.50            | Tceal3        |
| 1438426_at         | -7.04          | 2.87E-08 | 1.58E-06 | 9.83              | 0.96            | Tmem58        |
| 1416455_a_at       | -7.02          | 3.10E-08 | 1.65E-06 | 13.19             | 0.77            | Cryab         |
| 1436329_at         | -6.94          | 3.89E-08 | 1.94E-06 | 5.15              | 1.97            | Egr3          |
| 1447016_at         | -6.84          | 5.36E-08 | 2.50E-06 | 7.59              | 2.36            | Tbc1d1        |
| 1423176_at         | -6.73          | 7.53E-08 | 3.32E-06 | 12.49             | 0.85            | Tob1          |
| 1449178_at         | -6.68          | 8.73E-08 | 3.72E-06 | 13.82             | 0.51            | Pdlim3        |
| 1428097_at         | -6.63          | 1.00E-07 | 4.16E-06 | 9.37              | 0.98            | 2510009E07Rik |
| 1435339_at         | -6.62          | 1.05E-07 | 4.34E-06 | 9.82              | 0.92            | Kctd15        |
| 1455182_at         | -6.59          | 1.14E-07 | 4.59E-06 | 10.87             | 0.93            | Kif1b         |
| 1437449_at         | -6.57          | 1.22E-07 | 4.81E-06 | 4.02              | 1.38            | Rsad1         |
| 1425677_a_at       | -6.52          | 1.41E-07 | 5.42E-06 | 10.06             | 0.95            | Ank1          |
| 1434572_at         | -6.51          | 1.43E-07 | 5.47E-06 | 6.04              | 1.67            | Hdac9         |
| 1439774_at         | -6.51          | 1.44E-07 | 5.47E-06 | 7.17              | 2.18            | Prrx1         |
| 1433592_at         | -6.51          | 1.47E-07 | 5.57E-06 | 11.08             | 0.86            | Calm1         |
| 1415939_at         | -6.46          | 1.68E-07 | 6.27E-06 | 7.00              | 2.42            | Fmod          |
| 1429097_at         | -6.45          | 1.75E-07 | 6.49E-06 | 7.28              | 1.37            | C030044C12Rik |
| 1455238_at         | -6.45          | 1.76E-07 | 6.50E-06 | 4.67              | 1.82            | Mum1l1        |
| 1438966_x_at       | -6.43          | 1.85E-07 | 6.81E-06 | 7.29              | 1.90            | Fmod          |
| 1434909_at         | -6.40          | 2.04E-07 | 7.45E-06 | 12.21             | 0.65            | Rragd         |
| 1418025_at         | -6.38          | 2.16E-07 | 7.73E-06 | 9.98              | 1.29            | Bhlhb2        |
| 1436833_x_at       | -6.37          | 2.20E-07 | 7.83E-06 | 7.21              | 1.20            | Ttll1         |

| Probe <sup>1</sup> | t <sup>2</sup> | p-value  | q-value  | Mean <sup>3</sup> | FC <sup>4</sup> | Symbol        |
|--------------------|----------------|----------|----------|-------------------|-----------------|---------------|
| 1437685_x_at       | -6.37          | 2.21E-07 | 7.83E-06 | 4.17              | 2.45            | Fmod          |
| 1423851_a_at       | -6.31          | 2.71E-07 | 9.35E-06 | 10.29             | 0.97            | Tmem46        |
| 1422414_a_at       | -6.29          | 2.89E-07 | 9.77E-06 | 10.36             | 1.02            | Calm2         |
| 1438211_s_at       | -6.28          | 2.94E-07 | 9.91E-06 | 7.92              | 2.24            | Dbp           |
| 1448297_a_at       | -6.25          | 3.20E-07 | 1.07E-05 | 7.32              | 1.26            | Tnk2          |
| 1425153_at         | -6.24          | 3.32E-07 | 1.11E-05 | 14.33             | 0.52            | Myh2          |
| 1418258_s_at       | -6.23          | 3.45E-07 | 1.14E-05 | 11.70             | 0.79            | Arhgdia       |
| 1448960_at         | -6.22          | 3.51E-07 | 1.15E-05 | 6.85              | 1.23            | Cxzc5         |
| 1425534_at         | -6.20          | 3.76E-07 | 1.22E-05 | 9.81              | 0.89            | Stau2         |
| 1439669_at         | -6.18          | 3.95E-07 | 1.27E-05 | 3.57              | 1.33            | 6430571L13Rik |
| 1436943_at         | -6.16          | 4.25E-07 | 1.35E-05 | 6.11              | 1.59            | Cyb5d2        |
| 1443876_at         | -6.14          | 4.50E-07 | 1.41E-05 | 4.88              | 1.47            | Camk2a        |
| 1425528_at         | -6.14          | 4.53E-07 | 1.41E-05 | 9.50              | 0.87            | Prrx1         |
| 1424511_at         | -6.10          | 5.17E-07 | 1.57E-05 | 4.32              | 1.76            | Aurka         |
| 1418386_at         | -6.10          | 5.17E-07 | 1.57E-05 | 8.91              | 1.00            | N6amt2        |
| 1456315_a_at       | -6.08          | 5.36E-07 | 1.62E-05 | 10.07             | 1.13            | Ptpla         |
| 1450923_at         | -6.06          | 5.77E-07 | 1.71E-05 | 6.18              | 1.40            | Tgfb2         |
| 1421936_at         | -5.97          | 7.56E-07 | 2.14E-05 | 3.76              | 1.35            | Dapp1         |
| 1456854_at         | -5.95          | 8.17E-07 | 2.27E-05 | 3.67              | 1.56            | Neurl         |
| 1439066_at         | -5.94          | 8.34E-07 | 2.30E-05 | 6.08              | 1.38            | Angpt1        |
| 1434592_at         | -5.94          | 8.45E-07 | 2.32E-05 | 5.58              | 1.53            | Slc16a10      |
| 1441404_at         | -5.90          | 9.58E-07 | 2.57E-05 | 3.09              | 0.97            | Pafah1b1      |
| 1435556_at         | -5.81          | 1.24E-06 | 3.12E-05 | 6.57              | 1.23            | Zfp597        |
| 1418373_at         | -5.80          | 1.27E-06 | 3.18E-05 | 13.74             | 0.53            | Pgam2         |
| 1437718_x_at       | -5.80          | 1.28E-06 | 3.20E-05 | 4.23              | 2.32            | Fmod          |
| 1446421_at         | -5.80          | 1.30E-06 | 3.22E-05 | 3.57              | 1.13            | Schip1        |
| 1422535_at         | -5.79          | 1.32E-06 | 3.26E-05 | 7.41              | 1.07            | Ccne2         |
| 1417542_at         | -5.78          | 1.37E-06 | 3.33E-05 | 10.52             | 0.78            | Rps6ka2       |
| 1434442_at         | -5.78          | 1.39E-06 | 3.36E-05 | 9.23              | 0.95            | Stbd1         |
| 1428423_at         | -5.77          | 1.43E-06 | 3.43E-05 | 8.90              | 0.85            | Pcgf3         |
| 1423852_at         | -5.76          | 1.44E-06 | 3.46E-05 | 10.32             | 0.87            | Tmem46        |
| 1418592_at         | -5.73          | 1.58E-06 | 3.71E-05 | 8.80              | 0.89            | Dnaja4        |
| 1449357_at         | -5.72          | 1.65E-06 | 3.86E-05 | 7.67              | 1.05            | 2310030G06Rik |
| 1450828_at         | -5.71          | 1.70E-06 | 3.94E-05 | 10.56             | 0.84            | Synpo2        |
| 1455336_at         | -5.65          | 2.02E-06 | 4.56E-05 | 4.74              | 1.44            | Thap2         |
| 1437240_at         | -5.64          | 2.09E-06 | 4.70E-05 | 4.68              | 1.75            | Pgm2          |
| 1458425_at         | -5.64          | 2.14E-06 | 4.79E-05 | 7.81              | 1.04            | Myl6b         |
| 1450714_at         | -5.59          | 2.46E-06 | 5.38E-05 | 8.33              | 1.00            | Azin1         |
| 1438651_a_at       | -5.58          | 2.54E-06 | 5.54E-05 | 5.85              | 1.89            | Agtrl1        |
| 1453084_s_at       | -5.57          | 2.64E-06 | 5.71E-05 | 4.99              | 1.56            | Col22a1       |
| 1428750_at         | -5.55          | 2.75E-06 | 5.91E-05 | 5.61              | 1.47            | Cdc42ep2      |
| 1435115_at         | -5.54          | 2.88E-06 | 6.14E-05 | 8.21              | 1.01            | Fndc5         |
| 1435261_at         | -5.52          | 3.01E-06 | 6.39E-05 | 8.17              | 1.05            | 4732416N19Rik |
| 1424931_s_at       | -5.51          | 3.14E-06 | 6.63E-05 | 4.27              | 1.43            | Igl-V1        |
| 1421441_at         | -5.51          | 3.16E-06 | 6.65E-05 | 3.80              | 1.03            | Angpt1        |
| 1437212_at         | -5.50          | 3.24E-06 | 6.79E-05 | 4.68              | 1.23            | Zfp420        |
| 1426992_at         | -5.50          | 3.27E-06 | 6.84E-05 | 9.40              | 0.86            | Xpr1          |
| 1429918_at         | -5.49          | 3.33E-06 | 6.92E-05 | 8.67              | 0.90            | Arhgap20      |

| Probe <sup>1</sup> | t <sup>2</sup> | p-value  | q-value  | Mean <sup>3</sup> | FC <sup>4</sup> | Symbol        |
|--------------------|----------------|----------|----------|-------------------|-----------------|---------------|
| 1460510_a_at       | -5.49          | 3.35E-06 | 6.95E-05 | 7.71              | 1.35            | Coq10b        |
| 1419421_at         | -5.46          | 3.62E-06 | 7.40E-05 | 9.41              | 1.03            | Ank1          |
| 1433875_at         | -5.46          | 3.69E-06 | 7.51E-05 | 9.17              | 0.76            | 4732418C07Rik |
| 1456929_at         | -5.45          | 3.73E-06 | 7.58E-05 | 6.59              | 1.47            | BC042782      |
| 1424760_a_at       | -5.42          | 4.18E-06 | 8.39E-05 | 12.45             | 0.48            | Smyd2         |
| 1422155_at         | -5.42          | 4.18E-06 | 8.39E-05 | 6.50              | 1.19            | Hist2h3c2     |
| 1439487_at         | -5.41          | 4.25E-06 | 8.51E-05 | 5.69              | 1.37            | Lig4          |
| 1429206_at         | -5.41          | 4.30E-06 | 8.55E-05 | 8.04              | 1.19            | Rhobtb1       |
| 1450899_at         | -5.41          | 4.31E-06 | 8.55E-05 | 9.59              | 0.73            | Nedd1         |
| 1431422_a_at       | -5.40          | 4.42E-06 | 8.70E-05 | 4.24              | 1.46            | Dusp14        |
| 1449872_at         | -5.40          | 4.45E-06 | 8.76E-05 | 9.23              | 0.96            | Hspb3         |
| 1418420_at         | -5.38          | 4.66E-06 | 9.10E-05 | 4.18              | 1.53            | Myod1         |
| 1431836_x_at       | -5.38          | 4.67E-06 | 9.11E-05 | 5.91              | 1.72            | 5430432N15Rik |
| 1428849_at         | -5.38          | 4.69E-06 | 9.11E-05 | 4.80              | 1.31            | Rps6kb1       |
| 1450381_a_at       | -5.36          | 4.98E-06 | 9.62E-05 | 5.61              | 1.27            | Bcl6          |
| 1451507_at         | -5.34          | 5.37E-06 | 0.00010  | 11.71             | 0.74            | Mef2c         |
| 1437324_x_at       | -5.33          | 5.38E-06 | 0.00010  | 4.87              | 2.02            | Fmod          |
| 1442076_at         | -5.33          | 5.43E-06 | 0.00010  | 10.07             | 0.66            | Cobl          |
| 1426806_at         | -5.33          | 5.55E-06 | 0.00010  | 7.57              | 1.13            | Obfc2a        |
| 1436566_at         | -5.32          | 5.68E-06 | 0.00011  | 8.64              | 0.86            | Rab40b        |
| 1444091_a_at       | -5.31          | 5.83E-06 | 0.00011  | 3.43              | 1.19            | 6430571L13Rik |
| 1424367_a_at       | -5.30          | 6.00E-06 | 0.00011  | 7.70              | 1.53            | Homer2        |
| 1431233_at         | -5.28          | 6.33E-06 | 0.00012  | 4.10              | 1.03            | Cnnm4         |
| 1433657_at         | -5.27          | 6.50E-06 | 0.00012  | 4.52              | 1.46            | A130092J06Rik |
| 1455826_a_at       | -5.27          | 6.52E-06 | 0.00012  | 8.83              | 0.87            | Bace1         |
| 1451298_at         | -5.26          | 6.75E-06 | 0.00012  | 6.45              | 1.27            | Plekhh3       |
| 1456060_at         | -5.26          | 6.77E-06 | 0.00012  | 12.03             | 0.65            | Maf           |
| 1449211_at         | -5.23          | 7.42E-06 | 0.00013  | 8.51              | 0.86            | Bpnt1         |
| 1437908_a_at       | -5.22          | 7.62E-06 | 0.00014  | 8.49              | 0.88            | Ergic1        |
| 1423418_at         | -5.19          | 8.44E-06 | 0.00015  | 7.45              | 1.05            | Fdps          |
| 1437404_at         | -5.18          | 8.64E-06 | 0.00015  | 7.89              | 1.11            | Mast4         |
| 1419619_at         | -5.18          | 8.69E-06 | 0.00015  | 3.60              | 1.25            | Krt80         |
| 1454842_a_at       | -5.18          | 8.70E-06 | 0.00015  | 10.47             | 0.71            | B3galnt2      |
| 1429148_at         | -5.17          | 8.88E-06 | 0.00015  | 7.35              | 0.99            | Nfic          |
| 1430841_at         | -5.17          | 8.88E-06 | 0.00015  | 3.45              | 0.95            | 3300002P13Rik |
| 1449139_at         | -5.17          | 8.92E-06 | 0.00015  | 7.57              | 1.03            | 2310008M10Rik |
| 1416529_at         | -5.17          | 8.92E-06 | 0.00015  | 9.24              | 0.81            | Emp1          |
| 1452879_at         | -5.15          | 9.37E-06 | 0.00016  | 12.37             | 0.54            | Synpo2        |
| 1440859_at         | -5.15          | 9.62E-06 | 0.00016  | 8.85              | 1.02            | Akap6         |
| 1444235_at         | -5.14          | 9.72E-06 | 0.00016  | 6.36              | 1.06            | 1700025G04Rik |
| 1441636_at         | -5.14          | 9.89E-06 | 0.00017  | 4.01              | 1.62            | NA            |
| 1425834_a_at       | -5.14          | 9.91E-06 | 0.00017  | 8.48              | 0.96            | Gpam          |
| 1439408_a_at       | -5.12          | 1.05E-05 | 0.00018  | 3.70              | 0.96            | Med1          |
| 1433700_at         | -5.10          | 1.12E-05 | 0.00019  | 7.74              | 0.96            | 4933433P14Rik |
| 1457434_s_at       | -5.09          | 1.14E-05 | 0.00019  | 11.36             | 0.89            | Ptpla         |
| 1417298_at         | -5.09          | 1.15E-05 | 0.00019  | 6.45              | 1.22            | Ebpl          |
| 1417075_at         | -5.07          | 1.21E-05 | 0.00020  | 8.26              | 0.85            | 2010309E21Rik |
| 1438201_at         | -5.06          | 1.23E-05 | 0.00020  | 9.78              | 0.71            | Ppm2c         |



| Probe <sup>1</sup>   | t <sup>2</sup> | p-value  | q-value | Mean <sup>3</sup> | FC <sup>4</sup> | Symbol        |
|----------------------|----------------|----------|---------|-------------------|-----------------|---------------|
| 1441560_at           | -5.06          | 1.25E-05 | 0.00020 | 5.57              | 1.19            | Ctnna3        |
| 1434958_at           | -5.05          | 1.29E-05 | 0.00021 | 8.03              | 1.10            | Sacs          |
| 1459861_s_at         | -5.05          | 1.31E-05 | 0.00021 | 8.31              | 0.81            | Fbxl10        |
| 1438941_x_at         | -5.04          | 1.33E-05 | 0.00021 | 6.29              | 1.07            | Ampd2         |
| 1435417_at           | -5.04          | 1.34E-05 | 0.00021 | 9.39              | 0.75            | AI464131      |
| 1433526_at           | -5.04          | 1.34E-05 | 0.00021 | 5.70              | 1.29            | Klhl8         |
| 1455070_at           | -5.02          | 1.40E-05 | 0.00022 | 6.98              | 1.05            | Dcp2          |
| 1416505_at           | -5.01          | 1.45E-05 | 0.00023 | 10.04             | 1.04            | Nr4a1         |
| 1434135_at           | -5.01          | 1.46E-05 | 0.00023 | 9.72              | 0.73            | B3galnt2      |
| 1420689_at           | -5.01          | 1.47E-05 | 0.00023 | 3.14              | 1.07            | 4933415F23Rik |
| 1451811_at           | -5.00          | 1.49E-05 | 0.00023 | 10.09             | 0.62            | Cacng6        |
| 1448394_at           | -5.00          | 1.52E-05 | 0.00024 | 12.98             | 0.68            | Myl2          |
| 1432289_a_at         | -4.98          | 1.60E-05 | 0.00025 | 10.30             | 0.60            | Jsrp1         |
| 1450716_at           | -4.97          | 1.66E-05 | 0.00025 | 8.57              | 0.84            | Adamts1       |
| 1423672_at           | -4.96          | 1.67E-05 | 0.00025 | 6.93              | 1.10            | Ttc30b        |
| 1440559_at           | -4.96          | 1.69E-05 | 0.00026 | 4.91              | 1.16            | Hmga2-ps1     |
| 1436122_at           | -4.96          | 1.72E-05 | 0.00026 | 6.36              | 1.13            | Zfp667        |
| 1427426_at           | -4.95          | 1.75E-05 | 0.00026 | 6.87              | 1.23            | Kcnq5         |
| 1456661_at           | -4.95          | 1.75E-05 | 0.00026 | 6.00              | 1.38            | Jarid2        |
| 1418591_at           | -4.95          | 1.75E-05 | 0.00026 | 9.95              | 0.76            | Dnaja4        |
| 1449631_at           | -4.94          | 1.79E-05 | 0.00027 | 6.02              | 1.37            | Eno3          |
| 1429058_at           | -4.93          | 1.86E-05 | 0.00027 | 6.49              | 1.14            | Tmem107       |
| 1439491_at           | -4.92          | 1.89E-05 | 0.00028 | 5.70              | 1.76            | Lrrc38        |
| 1418782_at           | -4.92          | 1.91E-05 | 0.00028 | 8.44              | 0.87            | Rxrg          |
| 1454720_at           | -4.90          | 2.05E-05 | 0.00030 | 6.59              | 1.24            | Hs3st5        |
| 1449155_at           | -4.90          | 2.05E-05 | 0.00030 | 3.25              | 0.82            | Polr3g        |
| 1429888_a_at         | -4.89          | 2.12E-05 | 0.00031 | 8.44              | 0.81            | Hspb2         |
| 1425533_a_at         | -4.89          | 2.13E-05 | 0.00031 | 8.54              | 0.80            | Stau2         |
| 1438720_at           | -4.88          | 2.19E-05 | 0.00031 | 7.85              | 0.92            | 9330159F19Rik |
| 1439662_at           | -4.88          | 2.19E-05 | 0.00031 | 9.77              | 0.69            | Homer1        |
| 1441373_at           | -4.86          | 2.30E-05 | 0.00033 | 3.26              | 0.92            | Msi2          |
| 1417673_at           | -4.86          | 2.33E-05 | 0.00033 | 9.17              | 0.80            | Grb14         |
| 1451190_a_at         | -4.86          | 2.33E-05 | 0.00033 | 9.13              | 0.68            | Sbk1          |
| 1417366_s_at         | -4.86          | 2.33E-05 | 0.00033 | 11.57             | 0.57            | Calm1         |
| 1433509_s_at         | -4.85          | 2.34E-05 | 0.00033 | 10.14             | 0.68            | Reep1         |
| 1448884_at           | -4.85          | 2.35E-05 | 0.00033 | 7.11              | 0.96            | Gtf2e2        |
| 1447849_s_at         | -4.85          | 2.37E-05 | 0.00033 | 11.61             | 0.65            | Maf           |
| 1437363_at           | -4.85          | 2.38E-05 | 0.00033 | 10.59             | 0.71            | Homer1        |
| 1451506_at           | -4.85          | 2.39E-05 | 0.00033 | 11.44             | 0.69            | Mef2c         |
| AFFX-TransRecMur/X57 | -4.84          | 2.47E-05 | 0.00034 | 4.36              | 1.48            | Tfrc          |
| 1447657_s_at         | -4.82          | 2.62E-05 | 0.00036 | 10.63             | 0.91            | Synpo2l       |
| 1450910_at           | -4.81          | 2.66E-05 | 0.00036 | 10.92             | 0.53            | Cap2          |
| 1454637_at           | -4.81          | 2.66E-05 | 0.00036 | 8.00              | 0.97            | Klhl8         |
| 1434014_at           | -4.80          | 2.74E-05 | 0.00037 | 7.07              | 0.96            | Atg4c         |
| 1447934_at           | -4.80          | 2.74E-05 | 0.00037 | 9.68              | 0.71            | 9630033F20Rik |
| 1419527_at           | -4.80          | 2.74E-05 | 0.00037 | 5.24              | 1.44            | Comp          |
| 1419145_at           | -4.80          | 2.80E-05 | 0.00038 | 10.33             | 0.70            | Smtnl1        |
| 1435527_at           | -4.79          | 2.83E-05 | 0.00038 | 9.14              | 0.67            | Nfic          |

| Probe <sup>1</sup> | t <sup>2</sup> | p-value  | q-value | Mean <sup>3</sup> | FC <sup>4</sup> | Symbol        |
|--------------------|----------------|----------|---------|-------------------|-----------------|---------------|
| 1448298_at         | -4.79          | 2.88E-05 | 0.00039 | 3.53              | 0.82            | Tnk2          |
| 1419499_at         | -4.78          | 2.90E-05 | 0.00039 | 12.10             | 0.51            | Gpam          |
| 1451589_at         | -4.77          | 3.02E-05 | 0.00040 | 8.76              | 0.70            | Gats          |
| 1427167_at         | -4.76          | 3.13E-05 | 0.00041 | 7.24              | 1.19            | Armcx4        |
| 1448517_at         | -4.76          | 3.15E-05 | 0.00042 | 8.72              | 0.81            | Timm22        |
| 1436368_at         | -4.76          | 3.16E-05 | 0.00042 | 5.86              | 1.13            | Slc16a10      |
| 1417402_at         | -4.75          | 3.17E-05 | 0.00042 | 9.41              | 0.67            | 1190017O12Rik |
| 1416284_at         | -4.75          | 3.18E-05 | 0.00042 | 8.94              | 0.67            | Mrpl28        |
| 1439205_at         | -4.75          | 3.19E-05 | 0.00042 | 5.64              | 1.08            | Nfatc2        |
| 1426923_at         | -4.75          | 3.25E-05 | 0.00042 | 8.65              | 0.71            | Hrb           |
| 1417164_at         | -4.74          | 3.33E-05 | 0.00043 | 6.78              | 1.11            | Dusp10        |
| 1459145_at         | -4.73          | 3.44E-05 | 0.00044 | 4.59              | 1.23            | A930033H14Rik |
| 1424151_at         | -4.72          | 3.49E-05 | 0.00045 | 11.89             | 0.55            | Jtv1          |
| 1458379_at         | -4.72          | 3.54E-05 | 0.00045 | 8.39              | 0.79            | 9330159F19Rik |
| 1440339_at         | -4.72          | 3.54E-05 | 0.00045 | 3.91              | 0.96            | 4833416E15Rik |
| 1451203_at         | -4.71          | 3.59E-05 | 0.00046 | 14.27             | 0.37            | Mb            |
| 1460521_a_at       | -4.71          | 3.61E-05 | 0.00046 | 5.73              | 1.35            | Obfc2a        |
| 1460324_at         | -4.70          | 3.69E-05 | 0.00047 | 6.33              | 1.04            | Dnmt3a        |
| 1438022_at         | -4.70          | 3.80E-05 | 0.00048 | 8.66              | 0.74            | Rab11fip3     |
| 1428319_at         | -4.69          | 3.81E-05 | 0.00048 | 7.00              | 0.89            | Pdlim7        |
| 1433902_at         | -4.69          | 3.83E-05 | 0.00048 | 5.13              | 1.17            | Kbtbd8        |
| 1427831_s_at       | -4.69          | 3.85E-05 | 0.00048 | 8.89              | 0.70            | Zfp260        |
| 1418413_at         | -4.69          | 3.87E-05 | 0.00048 | 7.33              | 1.00            | Cav3          |
| 1418057_at         | -4.69          | 3.87E-05 | 0.00048 | 4.81              | 1.20            | Tiam1         |
| 1430176_at         | -4.69          | 3.88E-05 | 0.00048 | 5.28              | 1.16            | 5430433E21Rik |
| 1421028_a_at       | -4.68          | 3.94E-05 | 0.00049 | 11.24             | 0.72            | Mef2c         |
| 1418666_at         | -4.68          | 3.97E-05 | 0.00049 | 6.20              | 1.17            | Ptx3          |
| 1450870_at         | -4.68          | 3.99E-05 | 0.00049 | 7.03              | 0.89            | Rala          |
| 1423258_at         | -4.68          | 4.01E-05 | 0.00050 | 4.33              | 1.03            | Syt9          |
| 1435981_at         | -4.67          | 4.11E-05 | 0.00051 | 4.74              | 1.01            | Nav2          |
| 1448682_at         | -4.67          | 4.13E-05 | 0.00051 | 9.65              | 0.63            | Dynll1        |
| 1434196_at         | -4.66          | 4.18E-05 | 0.00051 | 10.25             | 0.70            | Dnaja4        |
| 1418337_at         | -4.66          | 4.25E-05 | 0.00052 | 8.92              | 0.69            | Rpia          |
| 1446450_at         | -4.64          | 4.45E-05 | 0.00054 | 3.98              | 0.95            | Ttn           |
| 1426959_at         | -4.64          | 4.52E-05 | 0.00055 | 5.81              | 1.45            | Bdh1          |
| 1444343_at         | -4.64          | 4.55E-05 | 0.00055 | 4.36              | 1.16            | A130064L14Rik |
| 1457904_at         | -4.63          | 4.58E-05 | 0.00055 | 3.42              | 0.78            | Car8          |
| 1417576_a_at       | -4.63          | 4.59E-05 | 0.00055 | 3.76              | 1.22            | Otub2         |
| 1453657_at         | -4.63          | 4.60E-05 | 0.00055 | 6.81              | 1.36            | 2310065F04Rik |
| 1428183_at         | -4.63          | 4.67E-05 | 0.00056 | 13.16             | 0.43            | Ankrd23       |
| 1429205_at         | -4.62          | 4.74E-05 | 0.00057 | 10.51             | 0.56            | Mllt3         |
| 1423010_at         | -4.62          | 4.77E-05 | 0.00057 | 4.92              | 1.28            | Sacs          |
| 1453744_a_at       | -4.60          | 5.01E-05 | 0.00059 | 9.72              | 0.62            | Ankrd40       |
| 1423978_at         | -4.60          | 5.08E-05 | 0.00060 | 5.67              | 1.06            | Sbk1          |
| 1436431_at         | -4.60          | 5.09E-05 | 0.00060 | 9.49              | 0.63            | 1700025G04Rik |
| 1416379_at         | -4.60          | 5.12E-05 | 0.00060 | 4.59              | 1.15            | Panx1         |
| 1454193_at         | -4.59          | 5.23E-05 | 0.00061 | 3.71              | 1.32            | 5430401H09Rik |
| 1418255_s_at       | -4.59          | 5.28E-05 | 0.00062 | 8.24              | 0.75            | Srf           |

| Probe <sup>1</sup> | t <sup>2</sup> | p-value  | q-value | Mean <sup>3</sup> | FC <sup>4</sup> | Symbol        |
|--------------------|----------------|----------|---------|-------------------|-----------------|---------------|
| 1419003_at         | -4.58          | 5.30E-05 | 0.00062 | 7.61              | 0.82            | Bves          |
| 1452203_at         | -4.58          | 5.41E-05 | 0.00063 | 7.82              | 0.91            | Obfc2a        |
| 1439627_at         | -4.58          | 5.41E-05 | 0.00063 | 3.53              | 0.91            | Zic1          |
| 1456125_a_at       | -4.58          | 5.41E-05 | 0.00063 | 10.84             | 0.58            | Dynll1        |
| 1452312_at         | -4.57          | 5.48E-05 | 0.00063 | 5.38              | 1.15            | 2810002D19Rik |
| 1452257_at         | -4.57          | 5.50E-05 | 0.00064 | 9.27              | 0.96            | Bdh1          |
| 1431281_at         | -4.57          | 5.54E-05 | 0.00064 | 10.90             | 0.68            | Dysfip1       |
| 1453592_at         | -4.57          | 5.60E-05 | 0.00064 | 10.01             | 0.63            | Lrrc39        |
| 1427414_at         | -4.56          | 5.63E-05 | 0.00065 | 8.97              | 0.74            | Prkar2a       |
| 1431890_a_at       | -4.56          | 5.65E-05 | 0.00065 | 9.81              | 0.59            | Mllt3         |
| 1449553_at         | -4.56          | 5.76E-05 | 0.00066 | 8.55              | 0.73            | Nkain1        |
| 1429065_at         | -4.54          | 6.01E-05 | 0.00069 | 5.65              | 1.02            | 1200009F10Rik |
| 1416846_a_at       | -4.54          | 6.16E-05 | 0.00070 | 11.69             | 0.50            | Pdzn3         |
| 1422562_at         | -4.53          | 6.24E-05 | 0.00071 | 3.97              | 1.68            | Rrad          |
| 1447057_at         | -4.53          | 6.27E-05 | 0.00071 | 7.88              | 0.92            | NA            |
| 1417339_a_at       | -4.53          | 6.31E-05 | 0.00071 | 11.04             | 0.54            | Dynll1        |
| 1439658_at         | -4.52          | 6.41E-05 | 0.00072 | 10.33             | 0.78            | Lmod3         |
| 1427400_at         | -4.51          | 6.61E-05 | 0.00074 | 6.42              | 1.06            | Lbx1          |
| 1427344_s_at       | -4.51          | 6.65E-05 | 0.00074 | 8.77              | 1.09            | Rasd2         |
| 1424003_at         | -4.51          | 6.66E-05 | 0.00074 | 6.44              | 0.91            | 4930444A02Rik |
| 1438577_at         | -4.51          | 6.67E-05 | 0.00074 | 7.47              | 0.87            | Inpp4b        |
| 1420816_at         | -4.51          | 6.68E-05 | 0.00074 | 5.65              | 1.15            | Ywhag         |
| 1422798_at         | -4.51          | 6.72E-05 | 0.00074 | 5.51              | 1.26            | Cntnap2       |
| 1449075_at         | -4.51          | 6.73E-05 | 0.00074 | 5.65              | 0.96            | Exdl2         |
| 1431469_a_at       | -4.50          | 6.85E-05 | 0.00076 | 4.80              | 1.09            | Cxxc5         |
| 1435398_at         | -4.50          | 6.93E-05 | 0.00076 | 5.82              | 1.02            | Stxbp5        |
| 1451262_a_at       | -4.49          | 7.02E-05 | 0.00077 | 11.03             | 0.53            | Jtv1          |
| 1458497_at         | -4.49          | 7.03E-05 | 0.00077 | 5.04              | 0.99            | NA            |
| 1456981_at         | -4.49          | 7.07E-05 | 0.00077 | 7.18              | 1.13            | Tmc7          |
| 1417155_at         | -4.49          | 7.09E-05 | 0.00078 | 3.74              | 0.78            | Mycn          |
| 1431164_at         | -4.49          | 7.12E-05 | 0.00078 | 7.08              | 1.03            | Rragd         |
| 1443007_at         | -4.48          | 7.30E-05 | 0.00079 | 3.27              | 0.75            | NA            |
| 1420504_at         | -4.48          | 7.35E-05 | 0.00080 | 3.14              | 0.82            | Slc6a14       |
| 1428295_at         | -4.44          | 8.13E-05 | 0.00087 | 8.87              | 0.97            | Synpo2l       |
| 1439708_at         | -4.44          | 8.14E-05 | 0.00087 | 7.69              | 1.02            | Myom3         |
| 1434228_at         | -4.43          | 8.32E-05 | 0.00088 | 9.48              | 0.63            | Ppm2c         |
| 1431734_a_at       | -4.43          | 8.45E-05 | 0.00090 | 9.63              | 0.56            | Dnajb4        |
| 1430567_at         | -4.43          | 8.57E-05 | 0.00091 | 3.57              | 1.31            | Spink5        |
| 1426427_at         | -4.42          | 8.66E-05 | 0.00091 | 3.32              | 0.73            | Ttl1          |
| 1435915_at         | -4.42          | 8.74E-05 | 0.00092 | 4.19              | 0.98            | Jmjd4         |
| 1443575_at         | -4.42          | 8.77E-05 | 0.00092 | 10.36             | 0.68            | 2310040G24Rik |
| 1424719_a_at       | -4.41          | 8.99E-05 | 0.00094 | 8.11              | 0.74            | Mapt          |
| 1421824_at         | -4.41          | 9.10E-05 | 0.00095 | 6.09              | 0.95            | Bace1         |
| 1449206_at         | -4.40          | 9.18E-05 | 0.00096 | 8.57              | 0.91            | Sypl2         |
| 1448119_at         | -4.40          | 9.31E-05 | 0.00097 | 9.51              | 0.60            | Bpgm          |
| 1451978_at         | -4.39          | 9.46E-05 | 0.00098 | 7.96              | 0.77            | Loxl1         |
| 1424110_a_at       | -4.39          | 9.49E-05 | 0.00098 | 7.68              | 0.99            | Nme1          |
| 1428945_at         | -4.38          | 9.68E-05 | 0.00100 | 4.74              | 0.94            | Uba6          |

| Probe <sup>1</sup> | t <sup>2</sup> | p-value  | q-value | Mean <sup>3</sup> | FC <sup>4</sup> | Symbol        |
|--------------------|----------------|----------|---------|-------------------|-----------------|---------------|
| 1435184_at         | -4.38          | 9.80E-05 | 0.00101 | 9.03              | 1.06            | Npr3          |
| 1460405_at         | -4.38          | 9.82E-05 | 0.00101 | 4.80              | 1.06            | Arhgef10l     |
| 1459875_x_at       | -4.38          | 9.85E-05 | 0.00102 | 4.20              | 0.93            | 5730494M16Rik |
| 1450729_at         | -4.37          | 0.00010  | 0.00103 | 7.41              | 0.90            | Hs2st1        |
| 1453485_s_at       | -4.37          | 0.00010  | 0.00104 | 9.96              | 0.54            | 1110005A03Rik |
| 1448643_at         | -4.36          | 0.00010  | 0.00106 | 7.84              | 0.85            | Ssna1         |
| 1449498_at         | -4.36          | 0.00010  | 0.00106 | 3.84              | 1.92            | Marco         |
| 1440603_at         | -4.36          | 0.00010  | 0.00106 | 4.49              | 0.91            | NA            |
| 1427768_s_at       | -4.36          | 0.00010  | 0.00106 | 12.37             | 0.67            | Myl3          |
| 1457671_at         | -4.36          | 0.00011  | 0.00107 | 7.03              | 1.31            | 9330120H11Rik |
| 1452661_at         | -4.36          | 0.00011  | 0.00107 | 9.67              | 1.18            | Tfrc          |
| 1441259_s_at       | -4.35          | 0.00011  | 0.00108 | 7.58              | 0.82            | Ift122        |
| 1434129_s_at       | -4.35          | 0.00011  | 0.00109 | 5.38              | 1.34            | Lhfp12        |
| 1430984_at         | -4.34          | 0.00011  | 0.00111 | 3.05              | 0.69            | Azin1         |
| 1440936_at         | -4.34          | 0.00011  | 0.00112 | 7.50              | 0.81            | Serac1        |
| 1428129_at         | -4.33          | 0.00011  | 0.00113 | 6.95              | 0.92            | Lman1         |
| 1426157_a_at       | -4.33          | 0.00011  | 0.00114 | 4.54              | 1.82            | Cd209b        |
| 1458000_at         | -4.33          | 0.00011  | 0.00115 | 4.26              | 1.47            | Dsg1a         |
| 1438596_at         | -4.33          | 0.00011  | 0.00115 | 4.39              | 1.01            | Hectd2        |
| 1455425_at         | -4.33          | 0.00012  | 0.00115 | 2.82              | 0.66            | BB001228      |
| 1446516_at         | -4.32          | 0.00012  | 0.00116 | 2.94              | 0.64            | Bcl7c         |
| 1417343_at         | -4.32          | 0.00012  | 0.00117 | 7.06              | 0.82            | Fxyd6         |
| 1416280_at         | -4.32          | 0.00012  | 0.00118 | 9.89              | 0.56            | Uba2          |
| 1427447_a_at       | -4.31          | 0.00012  | 0.00119 | 5.42              | 1.10            | Triobp        |
| 1451991_at         | -4.31          | 0.00012  | 0.00119 | 3.62              | 0.83            | Epha7         |
| 1441960_x_at       | -4.31          | 0.00012  | 0.00119 | 7.51              | 0.81            | 5730494M16Rik |
| 1428719_at         | -4.30          | 0.00012  | 0.00121 | 5.46              | 1.48            | 2010309G21Rik |
| 1416473_a_at       | -4.30          | 0.00013  | 0.00124 | 9.80              | 0.72            | Nope          |
| 1456203_at         | -4.29          | 0.00013  | 0.00125 | 4.08              | 2.38            | 1110020A10Rik |
| 1416201_at         | -4.29          | 0.00013  | 0.00127 | 9.37              | 0.59            | Crk           |
| 1416321_s_at       | -4.28          | 0.00013  | 0.00129 | 8.73              | 1.21            | Pre1p         |
| 1448827_s_at       | -4.28          | 0.00013  | 0.00129 | 5.25              | 1.39            | Myh6          |
| 1428681_at         | -4.28          | 0.00013  | 0.00130 | 7.71              | 0.80            | Gm608         |
| 1451207_at         | -4.27          | 0.00013  | 0.00131 | 8.71              | 0.65            | Cbara1        |
| 1425344_at         | -4.27          | 0.00013  | 0.00131 | 8.72              | 0.63            | Narf          |
| 1435828_at         | -4.27          | 0.00014  | 0.00131 | 10.25             | 0.68            | Maf           |
| 1434299_x_at       | -4.27          | 0.00014  | 0.00132 | 8.91              | 0.69            | Rabl4         |
| 1418482_at         | -4.27          | 0.00014  | 0.00133 | 3.29              | 0.73            | Cyb561d2      |
| 1423350_at         | -4.27          | 0.00014  | 0.00133 | 8.53              | 0.66            | Socs5         |
| 1452924_at         | -4.27          | 0.00014  | 0.00133 | 4.02              | 0.81            | 2310007D09Rik |
| 1449460_at         | -4.26          | 0.00014  | 0.00134 | 4.52              | 0.90            | Asb13         |
| 1438980_x_at       | -4.26          | 0.00014  | 0.00135 | 3.22              | 0.73            | Pm20d1        |
| 1423250_a_at       | -4.26          | 0.00014  | 0.00136 | 7.52              | 0.83            | Tgfb2         |
| 1446932_at         | -4.26          | 0.00014  | 0.00136 | 3.73              | 0.81            | NA            |
| 1420346_at         | -4.26          | 0.00014  | 0.00136 | 9.49              | 0.55            | Asb12         |
| 1429823_at         | -4.25          | 0.00014  | 0.00138 | 8.59              | 0.67            | Sgcg          |
| 1448024_at         | -4.25          | 0.00015  | 0.00139 | 7.14              | 1.17            | Npr3          |
| 1426640_s_at       | -4.24          | 0.00015  | 0.00140 | 8.58              | 0.72            | Trib2         |

| Probe <sup>1</sup> | t <sup>2</sup> | p-value | q-value | Mean <sup>3</sup> | FC <sup>4</sup> | Symbol        |
|--------------------|----------------|---------|---------|-------------------|-----------------|---------------|
| 1422813_at         | -4.24          | 0.00015 | 0.00140 | 10.87             | 0.53            | Cacng1        |
| 1456331_at         | -4.24          | 0.00015 | 0.00142 | 4.07              | 0.78            | 9130023H24Rik |
| 1421534_at         | -4.24          | 0.00015 | 0.00143 | 10.17             | 0.61            | LOC14210      |
| 1436978_at         | -4.23          | 0.00015 | 0.00144 | 7.07              | 0.80            | Wnt9a         |
| 1451488_at         | -4.23          | 0.00015 | 0.00145 | 10.44             | 0.53            | 1110028A07Rik |
| 1458578_at         | -4.23          | 0.00015 | 0.00146 | 3.26              | 0.71            | Rbms1         |
| 1419652_s_at       | -4.23          | 0.00016 | 0.00147 | 6.64              | 0.97            | Nkain1        |
| 1421087_at         | -4.22          | 0.00016 | 0.00148 | 4.54              | 1.25            | Per3          |
| 1444341_at         | -4.22          | 0.00016 | 0.00148 | 12.43             | 0.45            | 8030451F13Rik |
| 1428266_at         | -4.22          | 0.00016 | 0.00149 | 11.29             | 0.69            | Myl3          |
| 1438303_at         | -4.22          | 0.00016 | 0.00149 | 4.76              | 1.02            | Tgfb2         |
| 1455649_at         | -4.20          | 0.00017 | 0.00155 | 4.33              | 0.99            | Ttc9          |
| 1429364_at         | -4.20          | 0.00017 | 0.00156 | 5.11              | 0.95            | 4930579G24Rik |
| 1422598_at         | -4.20          | 0.00017 | 0.00156 | 13.53             | 0.40            | Casq1         |
| 1418626_a_at       | -4.20          | 0.00017 | 0.00156 | 8.66              | 0.73            | Clu           |
| 1424362_at         | -4.19          | 0.00017 | 0.00159 | 8.31              | 1.26            | Ppapdc3       |
| 1456930_at         | -4.19          | 0.00017 | 0.00159 | 6.95              | 0.84            | Camsap1       |
| 1424596_s_at       | -4.19          | 0.00017 | 0.00160 | 10.68             | 0.73            | Lmcd1         |
| 1437030_at         | -4.18          | 0.00018 | 0.00162 | 8.87              | 1.09            | Plcd4         |
| 1449037_at         | -4.18          | 0.00018 | 0.00163 | 7.67              | 0.79            | Crem          |
| 1418587_at         | -4.18          | 0.00018 | 0.00163 | 5.52              | 1.27            | Traf3         |
| 1417701_at         | -4.18          | 0.00018 | 0.00164 | 10.51             | 0.60            | Ppp1r14c      |
| 1428302_at         | -4.18          | 0.00018 | 0.00165 | 9.85              | 0.55            | Mrpl48        |
| 1454906_at         | -4.18          | 0.00018 | 0.00165 | 5.30              | 1.25            | Rarb          |
| 1450044_at         | -4.17          | 0.00018 | 0.00165 | 9.02              | 0.56            | Fzd7          |
| 1455058_at         | -4.17          | 0.00018 | 0.00167 | 5.45              | 0.94            | Mtmr9         |
| 1452080_a_at       | -4.16          | 0.00019 | 0.00170 | 8.15              | 0.77            | Dcun1d1       |
| 1452773_at         | -4.16          | 0.00019 | 0.00173 | 11.01             | 0.45            | 5730494N06Rik |
| 1440330_at         | -4.15          | 0.00019 | 0.00174 | 4.54              | 0.90            | Hist1h1e      |
| 1456029_a_at       | -4.15          | 0.00019 | 0.00176 | 7.64              | 0.89            | Ttc7b         |
| 1430584_s_at       | -4.14          | 0.00020 | 0.00177 | 9.72              | 1.14            | Car3          |
| 1450922_a_at       | -4.14          | 0.00020 | 0.00180 | 5.90              | 0.98            | Tgfb2         |
| 1443513_at         | -4.14          | 0.00020 | 0.00180 | 5.10              | 1.04            | NA            |
| 1427024_at         | -4.14          | 0.00020 | 0.00180 | 7.43              | 0.74            | Slain2        |
| 1434188_at         | -4.14          | 0.00020 | 0.00181 | 4.38              | 0.98            | Slc16a12      |
| 1458518_at         | -4.13          | 0.00020 | 0.00182 | 4.49              | 0.94            | Cpeb2         |
| 1428748_at         | -4.13          | 0.00020 | 0.00183 | 5.70              | 1.36            | 5830428H23Rik |
| 1455794_at         | -4.13          | 0.00021 | 0.00184 | 11.44             | 0.46            | Smtnl2        |
| 1428880_at         | -4.13          | 0.00021 | 0.00185 | 9.37              | 0.56            | 0610038F07Rik |
| 1433440_x_at       | -4.13          | 0.00021 | 0.00185 | 11.43             | 0.45            | Uba2          |
| 1453588_at         | -4.12          | 0.00021 | 0.00190 | 9.16              | 1.14            | Car3          |
| 1423196_at         | -4.11          | 0.00022 | 0.00190 | 5.69              | 0.97            | Nedd1         |
| 1424048_a_at       | -4.11          | 0.00022 | 0.00193 | 9.90              | 0.51            | Cyb5r1        |
| 1432281_a_at       | -4.11          | 0.00022 | 0.00194 | 4.31              | 1.56            | Itgb6         |
| 1452841_at         | -4.10          | 0.00022 | 0.00194 | 9.47              | 0.53            | Pgm2l1        |
| 1454884_at         | -4.10          | 0.00023 | 0.00197 | 5.27              | 0.97            | Zbtb46        |
| 1454794_at         | -4.10          | 0.00023 | 0.00198 | 9.35              | 0.54            | Spast         |
| 1425425_a_at       | -4.09          | 0.00023 | 0.00199 | 3.33              | 0.80            | Wif1          |

| Probe <sup>1</sup>   | t <sup>2</sup> | p-value | q-value | Mean <sup>3</sup> | FC <sup>4</sup> | Symbol        |
|----------------------|----------------|---------|---------|-------------------|-----------------|---------------|
| 1417473_a_at         | -4.09          | 0.00023 | 0.00202 | 5.39              | 0.99            | Ppcs          |
| 1446537_at           | -4.09          | 0.00023 | 0.00203 | 5.21              | 1.21            | NA            |
| 1430362_at           | -4.09          | 0.00024 | 0.00203 | 3.80              | 0.93            | 5730409N24Rik |
| 1436071_at           | -4.08          | 0.00024 | 0.00207 | 3.56              | 0.78            | Ankrd26       |
| 1453003_at           | -4.08          | 0.00024 | 0.00207 | 8.06              | 0.70            | Sorl1         |
| 1453739_at           | -4.08          | 0.00024 | 0.00207 | 7.77              | 0.74            | Tmem126b      |
| 1417365_a_at         | -4.08          | 0.00024 | 0.00207 | 12.29             | 0.42            | Calm1         |
| 1429234_s_at         | -4.07          | 0.00024 | 0.00209 | 7.90              | 0.70            | Sep-11        |
| 1448319_at           | -4.07          | 0.00025 | 0.00210 | 11.42             | 0.43            | Akr1b3        |
| 1417515_at           | -4.07          | 0.00025 | 0.00211 | 5.57              | 0.90            | Lsm10         |
| 1418209_a_at         | -4.07          | 0.00025 | 0.00211 | 12.98             | 0.36            | Pfn2          |
| 1426710_at           | -4.07          | 0.00025 | 0.00211 | 9.10              | 0.59            | Calm3         |
| 1418516_at           | -4.07          | 0.00025 | 0.00211 | 8.45              | 0.64            | Mtf2          |
| 1450813_a_at         | -4.07          | 0.00025 | 0.00211 | 10.99             | 0.68            | Tnni1         |
| 1436614_at           | -4.06          | 0.00025 | 0.00213 | 5.53              | 0.96            | NA            |
| 1419426_s_at         | -4.06          | 0.00025 | 0.00215 | 8.18              | 1.57            | Ccl21a        |
| 1417885_at           | -4.06          | 0.00025 | 0.00215 | 3.71              | 0.71            | Mapt          |
| 1451642_at           | -4.06          | 0.00026 | 0.00216 | 10.07             | 0.69            | Kif1b         |
| 1429656_at           | -4.06          | 0.00026 | 0.00216 | 5.03              | 1.31            | Rhobtb1       |
| 1456733_x_at         | -4.05          | 0.00026 | 0.00217 | 7.55              | 0.73            | Serpinh1      |
| 1419099_x_at         | -4.05          | 0.00026 | 0.00217 | 5.68              | 0.98            | Stom          |
| 1431334_a_at         | -4.05          | 0.00026 | 0.00218 | 4.74              | 0.90            | 4933433P14Rik |
| 1452166_a_at         | -4.05          | 0.00026 | 0.00221 | 7.98              | 2.69            | Krt10         |
| 1434314_s_at         | -4.04          | 0.00027 | 0.00223 | 10.17             | 0.46            | Rab11fip5     |
| 1429503_at           | -4.04          | 0.00027 | 0.00224 | 9.56              | 0.57            | 2900024C23Rik |
| 1434887_at           | -4.04          | 0.00027 | 0.00225 | 3.88              | 0.77            | Freq          |
| 1439815_at           | -4.03          | 0.00027 | 0.00228 | 3.62              | 0.66            | Heatr5b       |
| 1449945_at           | -4.03          | 0.00027 | 0.00228 | 5.23              | 1.10            | Ppargc1b      |
| 1436594_at           | -4.03          | 0.00028 | 0.00229 | 5.61              | 0.85            | Zfp719        |
| 1448248_at           | -4.03          | 0.00028 | 0.00229 | 10.42             | 0.50            | Crk           |
| 1436188_a_at         | -4.03          | 0.00028 | 0.00229 | 4.21              | 0.97            | Ndrp4         |
| 1418667_at           | -4.03          | 0.00028 | 0.00229 | 6.94              | 0.84            | 2410002O22Rik |
| 1416609_at           | -4.03          | 0.00028 | 0.00231 | 9.99              | 0.51            | BC004004      |
| 1430308_at           | -4.02          | 0.00028 | 0.00233 | 3.59              | 0.85            | 5730409N16Rik |
| AFFX-TransRecMur/X57 | -4.01          | 0.00029 | 0.00239 | 3.80              | 0.90            | Tfrc          |
| 1422482_at           | -4.01          | 0.00029 | 0.00242 | 6.06              | 0.95            | Ruvbl2        |
| 1418230_a_at         | -4.01          | 0.00030 | 0.00242 | 9.27              | 0.52            | Lims1         |
| 1416554_at           | -4.00          | 0.00031 | 0.00249 | 9.39              | 0.71            | Pdlim1        |
| 1431708_a_at         | -3.99          | 0.00031 | 0.00250 | 5.72              | 0.99            | Tia1          |
| 1427522_at           | -3.99          | 0.00031 | 0.00251 | 5.74              | 0.92            | Arhgap20      |
| 1442769_at           | -3.99          | 0.00031 | 0.00252 | 10.58             | 0.54            | 8030451F13Rik |
| 1433481_at           | -3.99          | 0.00031 | 0.00253 | 6.23              | 0.89            | Fkbp14        |
| 1426567_a_at         | -3.99          | 0.00031 | 0.00253 | 6.92              | 0.90            | Pq1c1         |
| 1429129_at           | -3.98          | 0.00032 | 0.00255 | 6.14              | 0.99            | Lrrcc1        |
| 1458297_s_at         | -3.98          | 0.00032 | 0.00257 | 3.80              | 1.09            | Marco         |
| 1436659_at           | -3.98          | 0.00032 | 0.00258 | 4.48              | 0.94            | Dclk1         |
| 1418798_s_at         | -3.98          | 0.00032 | 0.00258 | 8.44              | 0.83            | Srpk3         |
| 1455571_x_at         | -3.98          | 0.00032 | 0.00258 | 13.17             | 0.33            | Calm1         |

| Probe <sup>1</sup> | t <sup>2</sup> | p-value | q-value | Mean <sup>3</sup> | FC <sup>4</sup> | Symbol        |
|--------------------|----------------|---------|---------|-------------------|-----------------|---------------|
| 1437473_at         | -3.98          | 0.00032 | 0.00258 | 7.56              | 0.85            | Maf           |
| 1424223_at         | -3.98          | 0.00032 | 0.00260 | 9.77              | 0.57            | 1700020C11Rik |
| 1430623_s_at       | -3.97          | 0.00032 | 0.00260 | 7.37              | 0.94            | Obfc2a        |
| 1436332_at         | -3.97          | 0.00032 | 0.00260 | 13.93             | 0.30            | Hspb6         |
| 1418281_at         | -3.97          | 0.00033 | 0.00263 | 3.13              | 0.59            | Rad51         |
| 1440838_at         | -3.97          | 0.00033 | 0.00264 | 4.52              | 0.84            | AI852064      |
| 1417856_at         | -3.97          | 0.00033 | 0.00264 | 3.95              | 0.76            | Relb          |
| 1451149_at         | -3.97          | 0.00033 | 0.00264 | 13.06             | 0.34            | Pgm2          |
| 1421052_a_at       | -3.96          | 0.00034 | 0.00269 | 9.98              | 0.54            | Sms           |
| 1456789_at         | -3.95          | 0.00035 | 0.00276 | 7.72              | 0.79            | Zfp462        |
| 1444073_at         | -3.95          | 0.00035 | 0.00276 | 5.56              | 1.19            | Maf           |
| 1453055_at         | -3.95          | 0.00035 | 0.00276 | 8.22              | 0.64            | Sema6d        |
| 1427680_a_at       | -3.95          | 0.00035 | 0.00277 | 10.24             | 0.45            | Nfib          |
| 1435657_at         | -3.94          | 0.00036 | 0.00280 | 6.11              | 0.90            | NA            |
| 1417229_at         | -3.94          | 0.00036 | 0.00281 | 6.98              | 0.81            | Capn1         |
| 1450276_a_at       | -3.94          | 0.00036 | 0.00282 | 5.72              | 0.98            | Scin          |
| 1445684_s_at       | -3.94          | 0.00036 | 0.00283 | 9.99              | 0.49            | Hdac2         |
| 1422992_s_at       | -3.94          | 0.00036 | 0.00283 | 3.08              | 0.59            | Pik3cd        |
| 1449388_at         | -3.93          | 0.00037 | 0.00288 | 9.45              | 0.69            | Thbs4         |
| 1422983_at         | -3.93          | 0.00037 | 0.00288 | 4.30              | 1.38            | Itgb6         |
| 1422538_at         | -3.93          | 0.00037 | 0.00289 | 8.30              | 0.65            | Extl2         |
| 1452250_a_at       | -3.93          | 0.00037 | 0.00291 | 7.91              | 0.73            | Col6a2        |
| 1434272_at         | -3.93          | 0.00037 | 0.00292 | 10.12             | 0.48            | Cpeb2         |
| 1452319_at         | -3.93          | 0.00037 | 0.00292 | 3.29              | 0.71            | Zfp82         |
| 1437700_at         | -3.93          | 0.00037 | 0.00292 | 3.27              | 0.81            | Schip1        |
| 1423856_at         | -3.92          | 0.00038 | 0.00292 | 10.32             | 0.50            | Rpl17         |
| 1453421_at         | -3.92          | 0.00038 | 0.00293 | 5.16              | 1.04            | Srr           |
| 1424986_s_at       | -3.92          | 0.00038 | 0.00293 | 8.44              | 0.64            | Fbxw7         |
| 1437833_at         | -3.92          | 0.00038 | 0.00298 | 4.20              | 0.85            | Ltbp3         |
| 1420677_x_at       | -3.92          | 0.00039 | 0.00298 | 4.69              | 2.14            | Lce1a1        |
| 1437278_a_at       | -3.91          | 0.00039 | 0.00299 | 11.90             | 0.41            | Uba2          |
| 1418210_at         | -3.91          | 0.00039 | 0.00300 | 12.40             | 0.40            | Pfn2          |
| 1446563_at         | -3.91          | 0.00039 | 0.00301 | 4.20              | 1.06            | NA            |
| 1435787_at         | -3.91          | 0.00039 | 0.00301 | 9.06              | 0.62            | Ppm1l         |
| 1448484_at         | -3.91          | 0.00039 | 0.00301 | 12.10             | 0.49            | Amd1          |
| 1430125_s_at       | -3.91          | 0.00039 | 0.00303 | 8.59              | 0.61            | Pq1c1         |
| 1455732_at         | -3.91          | 0.00040 | 0.00305 | 9.25              | 0.55            | 2610510E02Rik |
| 1449059_a_at       | -3.90          | 0.00041 | 0.00312 | 13.02             | 0.34            | Oxct1         |
| 1451305_at         | -3.90          | 0.00041 | 0.00313 | 6.05              | 0.98            | Cby1          |
| 1443534_at         | -3.88          | 0.00042 | 0.00320 | 9.13              | 1.01            | NA            |
| 1434436_at         | -3.88          | 0.00043 | 0.00324 | 5.14              | 0.95            | Morc4         |
| 1440084_at         | -3.88          | 0.00043 | 0.00324 | 7.44              | 0.98            | AI663975      |
| 1423054_at         | -3.88          | 0.00043 | 0.00327 | 7.76              | 0.70            | Wdr1          |
| 1422879_at         | -3.88          | 0.00043 | 0.00327 | 10.81             | 0.49            | Sypl          |
| 1440202_at         | -3.88          | 0.00043 | 0.00327 | 4.41              | 0.86            | 5930412I24Rik |
| 1416313_at         | -3.87          | 0.00044 | 0.00335 | 10.68             | 0.51            | Mllt11        |
| 1449645_s_at       | -3.86          | 0.00045 | 0.00336 | 7.87              | 0.70            | Cct3          |
| 1422966_a_at       | -3.86          | 0.00045 | 0.00337 | 4.56              | 1.29            | Tfrc          |

| Probe <sup>1</sup> | t <sup>2</sup> | p-value | q-value | Mean <sup>3</sup> | FC <sup>4</sup> | Symbol        |
|--------------------|----------------|---------|---------|-------------------|-----------------|---------------|
| 1424131_at         | -3.86          | 0.00045 | 0.00339 | 8.39              | 0.64            | Col6a3        |
| 1425454_a_at       | -3.86          | 0.00046 | 0.00342 | 3.99              | 0.82            | Il12a         |
| 1450782_at         | -3.86          | 0.00046 | 0.00343 | 5.80              | 0.87            | Wnt4          |
| 1457587_at         | -3.85          | 0.00046 | 0.00345 | 9.23              | 0.61            | Kcnq5         |
| 1451219_at         | -3.85          | 0.00046 | 0.00345 | 9.29              | 0.51            | Ormdl1        |
| 1439946_at         | -3.85          | 0.00046 | 0.00345 | 5.64              | 1.12            | Mef2c         |
| 1440364_a_at       | -3.85          | 0.00047 | 0.00346 | 4.04              | 0.73            | Aasdh         |
| 1424014_at         | -3.85          | 0.00047 | 0.00346 | 6.43              | 0.78            | 2900092E17Rik |
| 1424616_s_at       | -3.84          | 0.00048 | 0.00354 | 7.98              | 0.66            | Frag1         |
| 1424990_at         | -3.84          | 0.00048 | 0.00354 | 6.12              | 0.92            | Orai1         |
| 1435228_at         | -3.83          | 0.00049 | 0.00361 | 9.46              | 0.48            | BC023829      |
| 1435194_at         | -3.83          | 0.00049 | 0.00362 | 10.00             | 0.49            | Hspa4         |
| 1438030_at         | -3.83          | 0.00050 | 0.00365 | 8.88              | 0.66            | Rasgrp3       |
| 1425767_a_at       | -3.83          | 0.00050 | 0.00365 | 9.01              | 0.53            | Six4          |
| 1459632_at         | -3.83          | 0.00050 | 0.00366 | 5.70              | 1.13            | NA            |
| 1422837_at         | -3.83          | 0.00050 | 0.00366 | 4.53              | 1.55            | Scel          |
| 1452646_at         | -3.82          | 0.00050 | 0.00367 | 11.34             | 0.54            | Trp53inp2     |
| 1443161_at         | -3.82          | 0.00051 | 0.00374 | 6.46              | 0.91            | Trps1         |
| 1434864_at         | -3.81          | 0.00052 | 0.00377 | 6.89              | 0.81            | Nipa1         |
| 1417435_at         | -3.81          | 0.00052 | 0.00377 | 8.83              | 0.59            | Large         |
| 1421027_a_at       | -3.81          | 0.00053 | 0.00382 | 12.70             | 0.47            | Mef2c         |
| 1457851_at         | -3.81          | 0.00053 | 0.00382 | 5.57              | 0.97            | D10Ertd276e   |
| 1434722_at         | -3.81          | 0.00053 | 0.00382 | 13.38             | 0.33            | Ampd1         |
| 1425730_at         | -3.81          | 0.00053 | 0.00383 | 5.79              | 0.86            | Cacng6        |
| 1460314_s_at       | -3.80          | 0.00053 | 0.00384 | 3.44              | 0.65            | Hist2h3c1     |
| 1421495_a_at       | -3.80          | 0.00054 | 0.00387 | 5.72              | 0.85            | 1700052N19Rik |
| 1418769_at         | -3.80          | 0.00054 | 0.00389 | 11.62             | 0.53            | Myoz2         |
| 1456211_at         | -3.80          | 0.00054 | 0.00389 | 3.11              | 0.70            | Nlrp10        |
| 1433897_at         | -3.80          | 0.00054 | 0.00390 | 9.91              | 0.48            | AI597468      |
| 1418063_at         | -3.79          | 0.00055 | 0.00392 | 3.34              | 0.84            | Kera          |
| 1446475_at         | -3.79          | 0.00055 | 0.00392 | 4.96              | 1.56            | Mbnl2         |
| 1427410_at         | -3.79          | 0.00056 | 0.00399 | 6.46              | 0.84            | Dleu2         |
| 1420817_at         | -3.79          | 0.00056 | 0.00399 | 10.27             | 0.45            | Ywhag         |
| 1417168_a_at       | -3.79          | 0.00056 | 0.00400 | 11.21             | 0.60            | Usp2          |
| 1456092_at         | -3.79          | 0.00056 | 0.00402 | 4.02              | 0.73            | Kctd7         |
| 1456052_at         | -3.78          | 0.00057 | 0.00404 | 3.01              | 0.56            | Cdkl3         |
| 1422407_s_at       | -3.78          | 0.00057 | 0.00407 | 9.09              | 0.61            | Hras1         |
| 1456862_at         | -3.78          | 0.00057 | 0.00407 | 9.81              | 0.56            | Six4          |
| 1455152_at         | -3.78          | 0.00057 | 0.00408 | 8.48              | 0.62            | AI462493      |
| 1419682_a_at       | -3.78          | 0.00058 | 0.00410 | 3.88              | 0.68            | Trp53rk       |
| 1420427_a_at       | -3.77          | 0.00058 | 0.00412 | 9.41              | 0.50            | Dhx32         |
| 1424648_at         | -3.77          | 0.00058 | 0.00413 | 4.85              | 1.01            | Rabl4         |
| 1448554_s_at       | -3.77          | 0.00059 | 0.00414 | 10.72             | 0.65            | Myh7          |
| 1448869_a_at       | -3.77          | 0.00059 | 0.00415 | 9.31              | 0.51            | Mrps16        |
| 1428347_at         | -3.76          | 0.00060 | 0.00423 | 4.73              | 0.83            | Cyfp2         |
| 1458367_at         | -3.76          | 0.00060 | 0.00423 | 4.23              | 2.15            | Gm94          |
| 1451968_at         | -3.76          | 0.00060 | 0.00423 | 6.75              | 0.77            | Xrcc5         |
| 1431030_a_at       | -3.76          | 0.00060 | 0.00424 | 7.47              | 0.83            | Rnf14         |



| Probe <sup>1</sup> | t <sup>2</sup> | p-value | q-value | Mean <sup>3</sup> | FC <sup>4</sup> | Symbol        |
|--------------------|----------------|---------|---------|-------------------|-----------------|---------------|
| 1426519_at         | -3.76          | 0.00061 | 0.00426 | 7.36              | 0.76            | P4ha1         |
| 1417644_at         | -3.75          | 0.00062 | 0.00434 | 10.05             | 0.50            | Sspn          |
| 1423082_at         | -3.75          | 0.00062 | 0.00435 | 8.61              | 0.60            | Derl1         |
| 1422558_at         | -3.75          | 0.00062 | 0.00435 | 4.44              | 0.89            | Gamt          |
| 1455334_at         | -3.75          | 0.00062 | 0.00435 | 6.22              | 0.88            | D330038O06Rik |
| 1417686_at         | -3.75          | 0.00062 | 0.00435 | 5.03              | 1.14            | Lgals12       |
| 1424614_at         | -3.75          | 0.00062 | 0.00436 | 5.91              | 0.89            | Frag1         |
| 1417985_at         | -3.75          | 0.00063 | 0.00436 | 4.96              | 1.06            | Nrarp         |
| 1421903_at         | -3.75          | 0.00063 | 0.00437 | 6.97              | 0.78            | Med29         |
| 1435066_at         | -3.74          | 0.00064 | 0.00444 | 7.32              | 0.89            | Pitpnc1       |
| 1426679_at         | -3.74          | 0.00064 | 0.00444 | 10.40             | 0.47            | Zfp706        |
| 1417014_at         | -3.74          | 0.00064 | 0.00446 | 9.50              | 0.49            | Hspb8         |
| 1418455_at         | -3.74          | 0.00064 | 0.00447 | 7.20              | 0.74            | Copz2         |
| 1454611_a_at       | -3.74          | 0.00065 | 0.00447 | 13.40             | 0.31            | Calm1         |
| 1445539_at         | -3.73          | 0.00065 | 0.00448 | 9.31              | 0.56            | Pde7b         |
| 1437234_x_at       | -3.73          | 0.00065 | 0.00450 | 4.57              | 0.81            | Prmt2         |
| 1438245_at         | -3.73          | 0.00066 | 0.00453 | 5.53              | 0.91            | Nfib          |
| 1439945_at         | -3.73          | 0.00066 | 0.00453 | 5.17              | 0.91            | Zfp449        |
| 1416665_at         | -3.73          | 0.00067 | 0.00458 | 10.54             | 0.50            | Coq7          |
| 1453726_s_at       | -3.72          | 0.00067 | 0.00461 | 10.99             | 0.40            | 2810407C02Rik |
| 1435801_at         | -3.72          | 0.00068 | 0.00465 | 6.67              | 0.89            | Fktn          |
| 1422009_at         | -3.72          | 0.00068 | 0.00466 | 8.04              | 0.66            | Atp1b2        |
| 1423746_at         | -3.71          | 0.00069 | 0.00470 | 8.23              | 0.59            | Txndc5        |
| 1451448_a_at       | -3.71          | 0.00069 | 0.00473 | 10.35             | 0.47            | 1110005A03Rik |
| 1420350_at         | -3.71          | 0.00069 | 0.00473 | 4.30              | 1.47            | Lce1a2        |
| 1417543_at         | -3.71          | 0.00070 | 0.00476 | 6.19              | 0.79            | Rps6ka2       |
| 1450344_a_at       | -3.71          | 0.00070 | 0.00478 | 4.65              | 1.32            | Ptger3        |
| 1453380_a_at       | -3.71          | 0.00070 | 0.00478 | 2.84              | 0.53            | Xrcc6bp1      |
| 1454084_a_at       | -3.71          | 0.00071 | 0.00480 | 6.22              | 0.79            | Senp8         |
| 1425527_at         | -3.70          | 0.00071 | 0.00482 | 5.19              | 1.01            | Prrx1         |
| 1420858_at         | -3.70          | 0.00071 | 0.00485 | 11.83             | 0.44            | Pkia          |
| 1445870_at         | -3.70          | 0.00072 | 0.00491 | 3.73              | 0.68            | Cdc42ep2      |
| 1447258_at         | -3.70          | 0.00072 | 0.00491 | 4.56              | 0.93            | Myst4         |
| 1419985_s_at       | -3.69          | 0.00073 | 0.00495 | 6.75              | 0.91            | Ccdc69        |
| 1419480_at         | -3.69          | 0.00073 | 0.00496 | 2.72              | 0.66            | Sell          |
| 1452353_at         | -3.69          | 0.00074 | 0.00496 | 8.42              | 0.61            | Gpr155        |
| 1434500_at         | -3.69          | 0.00074 | 0.00497 | 5.97              | 0.80            | Ttyh2         |
| 1423234_at         | -3.69          | 0.00074 | 0.00498 | 8.17              | 0.57            | Psmd5         |
| 1452801_at         | -3.69          | 0.00074 | 0.00499 | 4.52              | 0.85            | Pigk          |
| 1449072_a_at       | -3.69          | 0.00074 | 0.00499 | 8.25              | 0.62            | N6amt2        |
| 1418702_a_at       | -3.69          | 0.00075 | 0.00501 | 9.48              | 0.47            | 2810428I15Rik |
| 1425526_a_at       | -3.68          | 0.00075 | 0.00501 | 8.20              | 0.79            | Prrx1         |
| 1450865_s_at       | -3.68          | 0.00075 | 0.00502 | 9.45              | 0.47            | Mrps24        |
| 1440443_at         | -3.68          | 0.00075 | 0.00503 | 7.56              | 1.32            | E030016H06Rik |
| 1448755_at         | -3.68          | 0.00075 | 0.00503 | 3.78              | 0.89            | Col15a1       |
| 1417979_at         | -3.68          | 0.00076 | 0.00506 | 4.77              | 1.27            | Tnmd          |
| 1433544_at         | -3.68          | 0.00076 | 0.00508 | 10.47             | 0.44            | Als2cr2       |
| 1436538_at         | -3.68          | 0.00076 | 0.00508 | 3.77              | 0.69            | Ankrd37       |

| Probe <sup>1</sup> | t <sup>2</sup> | p-value | q-value | Mean <sup>3</sup> | FC <sup>4</sup> | Symbol   |
|--------------------|----------------|---------|---------|-------------------|-----------------|----------|
| 1424735_at         | -3.67          | 0.00078 | 0.00517 | 4.54              | 1.66            | Slc25a25 |
| 1450085_at         | -3.67          | 0.00078 | 0.00518 | 6.15              | 1.10            | Angptl2  |
| 1448533_at         | -3.67          | 0.00078 | 0.00519 | 9.39              | 0.48            | Tbcb     |
| 1452146_a_at       | -3.67          | 0.00078 | 0.00520 | 8.29              | 0.62            | Cox15    |
| 1431043_at         | -3.67          | 0.00078 | 0.00520 | 10.75             | 0.61            | Kbtbd5   |
| 1449080_at         | -3.67          | 0.00079 | 0.00521 | 8.88              | 0.53            | Hdac2    |
| 1423222_at         | -3.66          | 0.00080 | 0.00530 | 10.72             | 0.53            | Cap2     |
| 1459800_s_at       | -3.66          | 0.00081 | 0.00536 | 8.74              | 0.57            | Map3k4   |
| 1448194_a_at       | -3.65          | 0.00082 | 0.00539 | 11.97             | 0.48            | H19      |
| 1434306_at         | -3.65          | 0.00082 | 0.00540 | 8.41              | 0.54            | Rab3ip   |
| 1417364_at         | -3.65          | 0.00082 | 0.00541 | 12.49             | 0.32            | Eef1g    |
| 1458802_at         | -3.65          | 0.00083 | 0.00542 | 4.71              | 0.90            | Hivep3   |
| 1429621_at         | -3.64          | 0.00084 | 0.00549 | 8.64              | 0.61            | Cand2    |
| 1440555_at         | -3.64          | 0.00084 | 0.00550 | 5.97              | 0.93            | Rragd    |
| 1456057_x_at       | -3.64          | 0.00085 | 0.00553 | 13.65             | 0.28            | Tmem109  |
| 1460583_at         | -3.64          | 0.00085 | 0.00556 | 6.25              | 0.83            | Golt1b   |
| 1450385_at         | -3.64          | 0.00086 | 0.00557 | 9.04              | 0.56            | Kpna3    |
| 1429389_at         | -3.64          | 0.00086 | 0.00559 | 4.90              | 0.91            | Setmar   |
| 1439073_at         | -3.63          | 0.00087 | 0.00563 | 3.96              | 0.67            | Zfp160   |
| 1434348_at         | -3.63          | 0.00087 | 0.00565 | 9.31              | 0.47            | Fez2     |
| 1448844_at         | -3.63          | 0.00087 | 0.00566 | 8.19              | 0.64            | Cyb5b    |
| 1451486_at         | -3.62          | 0.00089 | 0.00576 | 4.41              | 0.78            | Slc46a3  |
| 1424012_at         | -3.62          | 0.00089 | 0.00576 | 5.32              | 0.87            | Ttc30a1  |
| 1455292_x_at       | -3.62          | 0.00089 | 0.00576 | 5.36              | 0.83            | Rsl1     |
| 1434532_at         | -3.62          | 0.00090 | 0.00578 | 4.76              | 0.96            | Csnrp2   |
| 1434152_at         | -3.62          | 0.00090 | 0.00581 | 4.81              | 1.26            | Apol7c   |
| 1416019_at         | -3.61          | 0.00092 | 0.00591 | 5.08              | 0.84            | Dr1      |
| 1424107_at         | -3.61          | 0.00093 | 0.00594 | 4.44              | 0.77            | Kif18a   |
| 1434565_at         | -3.61          | 0.00093 | 0.00594 | 10.22             | 0.44            | Cgrrf1   |
| 1428865_at         | -3.61          | 0.00093 | 0.00595 | 4.08              | 0.69            | Bcl2l12  |
| 1455450_at         | -3.61          | 0.00093 | 0.00597 | 8.48              | 0.64            | Ptpn3    |
| 1428199_at         | -3.60          | 0.00094 | 0.00601 | 6.05              | 0.85            | Adal     |
| 1439848_at         | -3.60          | 0.00096 | 0.00611 | 5.83              | 0.92            | Bves     |
| 1443001_at         | -3.60          | 0.00096 | 0.00612 | 3.10              | 0.58            | C78344   |
| 1435649_at         | -3.60          | 0.00096 | 0.00612 | 12.36             | 0.38            | Nexn     |
| 1449383_at         | -3.59          | 0.00097 | 0.00613 | 13.36             | 0.29            | Adssl1   |
| 1448467_a_at       | -3.59          | 0.00097 | 0.00615 | 8.99              | 0.49            | Ehbp1l1  |
| 1422772_at         | -3.59          | 0.00098 | 0.00619 | 6.75              | 0.79            | C1galt1  |
| 1417455_at         | -3.59          | 0.00098 | 0.00622 | 8.85              | 0.55            | Tgfb3    |
| 1419401_at         | -3.59          | 0.00098 | 0.00622 | 7.95              | 0.73            | Asb13    |
| 1434520_at         | -3.59          | 0.00099 | 0.00623 | 8.20              | 0.59            | Sc5d     |
| 1428811_at         | -3.59          | 0.00099 | 0.00624 | 4.34              | 0.73            | Wfikkn2  |
| 1452681_at         | -3.58          | 0.00099 | 0.00626 | 5.75              | 0.80            | Dtymk    |
| 1454295_at         | -3.58          | 0.00099 | 0.00626 | 6.47              | 1.12            | Nrip1    |
| 1421002_at         | -3.58          | 0.00100 | 0.00632 | 4.66              | 1.09            | Angptl2  |
| 1434096_at         | -3.58          | 0.00101 | 0.00632 | 7.32              | 0.83            | Slc4a4   |
| 1452130_at         | -3.58          | 0.00101 | 0.00634 | 9.86              | 0.48            | Txndc14  |
| 1436045_at         | -3.58          | 0.00101 | 0.00635 | 7.54              | 0.67            | Tsga10   |

| Probe <sup>1</sup> | t <sup>2</sup> | p-value | q-value | Mean <sup>3</sup> | FC <sup>4</sup> | Symbol        |
|--------------------|----------------|---------|---------|-------------------|-----------------|---------------|
| 1457898_at         | -3.58          | 0.00101 | 0.00635 | 4.77              | 0.91            | NA            |
| 1434879_at         | -3.58          | 0.00102 | 0.00638 | 11.11             | 0.39            | Cdc34         |
| 1449618_s_at       | -3.57          | 0.00103 | 0.00640 | 7.20              | 0.71            | 2900092E17Rik |
| 1416390_at         | -3.57          | 0.00104 | 0.00648 | 5.89              | 0.84            | Rcbtb2        |
| 1458040_at         | -3.56          | 0.00106 | 0.00659 | 4.11              | 0.72            | D7Wsu130e     |
| 1438345_at         | -3.56          | 0.00106 | 0.00659 | 6.19              | 0.90            | NA            |
| 1426719_at         | -3.56          | 0.00106 | 0.00659 | 9.15              | 0.49            | Apbb2         |
| 1425492_at         | -3.56          | 0.00106 | 0.00659 | 10.19             | 0.39            | Bmpr1a        |
| 1429233_at         | -3.56          | 0.00107 | 0.00660 | 4.37              | 0.76            | Sep-11        |
| 1448460_at         | -3.56          | 0.00107 | 0.00661 | 8.65              | 0.55            | Acvr1         |
| 1428406_s_at       | -3.56          | 0.00107 | 0.00662 | 9.62              | 0.43            | Hcfc1r1       |
| 1456176_x_at       | -3.55          | 0.00108 | 0.00667 | 10.27             | 0.42            | Slc25a39      |
| 1453749_at         | -3.55          | 0.00108 | 0.00667 | 4.33              | 0.71            | 2610507I01Rik |
| 1427112_at         | -3.55          | 0.00109 | 0.00669 | 6.78              | 0.71            | Ttl           |
| 1456812_at         | -3.55          | 0.00109 | 0.00671 | 6.92              | 0.70            | Abcd2         |
| 1435991_at         | -3.55          | 0.00110 | 0.00676 | 6.31              | 0.81            | Nr3c2         |
| 1443219_at         | -3.55          | 0.00110 | 0.00676 | 9.38              | 0.56            | NA            |
| 1448648_at         | -3.54          | 0.00111 | 0.00682 | 3.56              | 0.59            | 9130005N14Rik |
| 1445841_at         | -3.54          | 0.00112 | 0.00685 | 7.82              | 0.68            | Lrrc39        |
| 1419114_at         | -3.54          | 0.00112 | 0.00685 | 5.72              | 0.79            | Alg14         |
| 1438759_x_at       | -3.54          | 0.00112 | 0.00687 | 9.92              | 0.43            | NA            |
| 1445574_at         | -3.54          | 0.00113 | 0.00687 | 7.36              | 0.97            | NA            |
| 1429135_at         | -3.54          | 0.00113 | 0.00689 | 3.51              | 0.59            | 1110059M19Rik |
| 1425007_at         | -3.54          | 0.00113 | 0.00690 | 4.83              | 0.91            | Zfp566        |
| 1452638_s_at       | -3.54          | 0.00114 | 0.00693 | 7.24              | 0.86            | Dnm1l         |
| 1448356_at         | -3.54          | 0.00114 | 0.00693 | 9.05              | 0.46            | Ube2d2        |
| 1450416_at         | -3.54          | 0.00114 | 0.00694 | 4.72              | 0.80            | Cbx5          |
| 1453230_at         | -3.53          | 0.00114 | 0.00695 | 6.06              | 0.84            | Zfp74         |
| 1435541_at         | -3.53          | 0.00115 | 0.00695 | 3.59              | 0.74            | Btc           |
| 1435764_a_at       | -3.53          | 0.00115 | 0.00696 | 7.47              | 0.63            | Gemin7        |
| 1417930_at         | -3.53          | 0.00116 | 0.00700 | 3.77              | 0.64            | Nab2          |
| 1433460_at         | -3.53          | 0.00116 | 0.00701 | 10.64             | 0.45            | Ttc7b         |
| 1452328_s_at       | -3.53          | 0.00116 | 0.00701 | 9.51              | 0.47            | Pja2          |
| 1455626_at         | -3.53          | 0.00117 | 0.00703 | 9.09              | 0.59            | Hoxa9         |
| 1452340_at         | -3.53          | 0.00117 | 0.00703 | 4.88              | 0.77            | Zfp518b       |
| 1457304_at         | -3.52          | 0.00117 | 0.00707 | 4.28              | 0.81            | D13ErtD787e   |
| 1455054_a_at       | -3.52          | 0.00118 | 0.00712 | 10.20             | 0.38            | Dcun1d1       |
| 1451872_a_at       | -3.52          | 0.00120 | 0.00721 | 4.28              | 0.71            | Neurl         |
| 1433621_at         | -3.52          | 0.00120 | 0.00721 | 6.53              | 0.76            | Wdr41         |
| 1452381_at         | -3.52          | 0.00121 | 0.00721 | 5.70              | 0.84            | Creb3l2       |
| 1444387_at         | -3.51          | 0.00121 | 0.00723 | 3.90              | 0.64            | Nmt2          |
| 1438244_at         | -3.51          | 0.00121 | 0.00725 | 7.09              | 0.78            | Nfib          |
| 1444130_at         | -3.51          | 0.00121 | 0.00725 | 5.23              | 0.79            | 1700081L11Rik |
| 1435970_at         | -3.51          | 0.00122 | 0.00725 | 9.11              | 0.49            | Nlk           |
| 1416536_at         | -3.51          | 0.00123 | 0.00731 | 7.26              | 0.72            | Mum1          |
| 1451975_at         | -3.51          | 0.00123 | 0.00731 | 7.81              | 0.70            | 2810453I06Rik |
| 1441482_at         | -3.51          | 0.00123 | 0.00731 | 4.15              | 0.91            | Map2k6        |
| 1450843_a_at       | -3.51          | 0.00123 | 0.00732 | 8.76              | 0.53            | Serpinh1      |

| Probe <sup>1</sup> | t <sup>2</sup> | p-value | q-value | Mean <sup>3</sup> | FC <sup>4</sup> | Symbol        |
|--------------------|----------------|---------|---------|-------------------|-----------------|---------------|
| 1420676_at         | -3.51          | 0.00123 | 0.00732 | 4.57              | 2.38            | Lce1a1        |
| 1424440_at         | -3.51          | 0.00123 | 0.00732 | 8.90              | 0.57            | Mrps6         |
| 1451540_at         | -3.51          | 0.00123 | 0.00732 | 8.58              | 0.53            | Mpi           |
| 1448669_at         | -3.51          | 0.00123 | 0.00732 | 4.54              | 1.06            | Dkk3          |
| 1428598_at         | -3.51          | 0.00124 | 0.00734 | 6.08              | 0.79            | Tbc1d7        |
| 1437019_at         | -3.50          | 0.00125 | 0.00735 | 5.96              | 1.26            | 2200001I15Rik |
| 1455538_at         | -3.50          | 0.00125 | 0.00735 | 9.18              | 0.49            | 6330403M23Rik |
| 1449459_s_at       | -3.50          | 0.00125 | 0.00735 | 8.49              | 0.62            | Asb13         |
| 1418095_at         | -3.50          | 0.00125 | 0.00735 | 13.61             | 0.33            | Smpx          |
| 1460687_at         | -3.50          | 0.00125 | 0.00735 | 9.57              | 0.57            | Setd8         |
| 1424801_at         | -3.50          | 0.00125 | 0.00737 | 8.72              | 0.66            | Enah          |
| 1453552_at         | -3.50          | 0.00125 | 0.00737 | 7.88              | 0.83            | 2310014F07Rik |
| 1436844_at         | -3.50          | 0.00126 | 0.00741 | 9.06              | 0.45            | AW046287      |
| 1441445_at         | -3.50          | 0.00126 | 0.00742 | 4.96              | 0.87            | Per3          |
| 1452049_at         | -3.50          | 0.00127 | 0.00745 | 7.87              | 0.59            | Rpl7l1        |
| 1455650_at         | -3.50          | 0.00127 | 0.00745 | 3.70              | 0.69            | NA            |
| 1456770_at         | -3.50          | 0.00128 | 0.00747 | 3.88              | 0.75            | Zfp14         |
| 1424946_a_at       | -3.49          | 0.00128 | 0.00748 | 6.53              | 0.72            | Mtfr1         |
| 1454857_at         | -3.49          | 0.00128 | 0.00748 | 3.67              | 0.64            | Rnf122        |
| 1442873_at         | -3.49          | 0.00128 | 0.00748 | 4.01              | 0.67            | NA            |
| 1433923_at         | -3.49          | 0.00128 | 0.00749 | 5.38              | 2.76            | Krt77         |
| 1417081_a_at       | -3.49          | 0.00128 | 0.00750 | 12.17             | 0.35            | Syngn2        |
| 1422529_s_at       | -3.49          | 0.00128 | 0.00750 | 9.02              | 0.80            | Casq2         |
| 1457532_at         | -3.49          | 0.00128 | 0.00750 | 4.19              | 0.71            | Garnl1        |
| 1447783_x_at       | -3.49          | 0.00129 | 0.00750 | 7.83              | 0.62            | Slc25a39      |
| 1456895_at         | -3.49          | 0.00129 | 0.00750 | 5.11              | 1.85            | Cd209b        |
| 1458376_at         | -3.49          | 0.00130 | 0.00755 | 5.56              | 0.92            | B930025B16Rik |
| 1425646_at         | -3.49          | 0.00131 | 0.00760 | 6.35              | 0.88            | BC016495      |
| 1434927_at         | -3.48          | 0.00132 | 0.00768 | 12.26             | 0.56            | Hspb7         |
| 1448127_at         | -3.48          | 0.00133 | 0.00769 | 8.49              | 0.61            | Rrm1          |
| 1453604_a_at       | -3.48          | 0.00133 | 0.00770 | 8.43              | 0.57            | Hbs1l         |
| 1427936_at         | -3.48          | 0.00133 | 0.00770 | 3.88              | 0.68            | Thnsl1        |
| 1455060_at         | -3.48          | 0.00134 | 0.00773 | 8.75              | 0.55            | G3bp1         |
| 1423488_at         | -3.48          | 0.00134 | 0.00774 | 8.74              | 1.30            | Mmd           |
| 1453424_at         | -3.48          | 0.00134 | 0.00774 | 5.65              | 0.88            | Fyco1         |
| 1433842_at         | -3.48          | 0.00134 | 0.00774 | 7.86              | 0.71            | Lrrfip1       |
| 1429565_s_at       | -3.48          | 0.00134 | 0.00774 | 4.54              | 1.70            | Lce1m         |
| 1425231_a_at       | -3.48          | 0.00135 | 0.00775 | 8.57              | 0.52            | Zfp46         |
| 1421953_at         | -3.48          | 0.00135 | 0.00776 | 3.84              | 0.63            | Crkl          |
| 1439753_x_at       | -3.47          | 0.00136 | 0.00783 | 9.85              | 0.50            | Six4          |
| 1460412_at         | -3.47          | 0.00137 | 0.00785 | 3.04              | 0.51            | Fbln7         |
| 1435207_at         | -3.47          | 0.00137 | 0.00785 | 6.64              | 0.85            | Dixdc1        |
| 1437739_a_at       | -3.47          | 0.00137 | 0.00786 | 4.20              | 0.71            | 5430432N15Rik |
| 1429348_at         | -3.46          | 0.00139 | 0.00795 | 10.16             | 0.39            | Sema3c        |
| 1451558_at         | -3.46          | 0.00139 | 0.00795 | 8.62              | 0.55            | Fbxw7         |
| 1438072_at         | -3.46          | 0.00139 | 0.00796 | 5.99              | 0.79            | Nfib          |
| 1449079_s_at       | -3.46          | 0.00140 | 0.00797 | 11.62             | 0.37            | St3gal6       |
| 1425211_at         | -3.46          | 0.00140 | 0.00798 | 6.39              | 0.75            | Gatc          |

| Probe <sup>1</sup> | t <sup>2</sup> | p-value | q-value | Mean <sup>3</sup> | FC <sup>4</sup> | Symbol        |
|--------------------|----------------|---------|---------|-------------------|-----------------|---------------|
| 1455326_at         | -3.46          | 0.00140 | 0.00798 | 3.20              | 0.51            | Clec16a       |
| 1434389_at         | -3.46          | 0.00140 | 0.00799 | 8.41              | 0.51            | Sos1          |
| 1417093_a_at       | -3.46          | 0.00141 | 0.00802 | 6.94              | 0.68            | Gtf2h4        |
| 1432436_a_at       | -3.46          | 0.00142 | 0.00807 | 6.39              | 0.76            | Ak3           |
| 1454850_at         | -3.46          | 0.00142 | 0.00809 | 4.49              | 0.85            | Tbc1d10c      |
| 1434900_at         | -3.46          | 0.00143 | 0.00810 | 4.98              | 0.99            | Mkl1          |
| 1431606_a_at       | -3.46          | 0.00143 | 0.00810 | 6.56              | 0.78            | Angel2        |
| 1426984_at         | -3.45          | 0.00143 | 0.00810 | 5.25              | 0.80            | 2310067B10Rik |
| 1421815_at         | -3.45          | 0.00145 | 0.00823 | 8.95              | 0.51            | Epdr1         |
| 1447658_x_at       | -3.45          | 0.00145 | 0.00823 | 6.82              | 0.81            | Synpo2l       |
| 1435745_at         | -3.45          | 0.00146 | 0.00826 | 10.73             | 0.43            | 5031439G07Rik |
| 1458087_at         | -3.45          | 0.00147 | 0.00829 | 11.10             | 0.41            | Stac3         |
| 1423349_at         | -3.44          | 0.00147 | 0.00829 | 5.21              | 0.76            | Socs5         |
| 1448693_at         | -3.44          | 0.00148 | 0.00833 | 4.28              | 0.66            | Gltpd1        |
| 1421828_at         | -3.44          | 0.00148 | 0.00834 | 10.14             | 0.40            | Kpna3         |
| 1426887_at         | -3.44          | 0.00148 | 0.00835 | 3.66              | 0.62            | Nudt11        |
| 1421059_a_at       | -3.44          | 0.00149 | 0.00836 | 6.79              | 0.85            | Alg2          |
| 1434657_at         | -3.44          | 0.00149 | 0.00837 | 8.21              | 0.59            | Gls           |
| 1449017_at         | -3.44          | 0.00149 | 0.00838 | 8.24              | 0.56            | Nutf2         |
| 1417982_at         | -3.44          | 0.00150 | 0.00840 | 9.24              | 0.48            | Insig2        |
| 1425027_s_at       | -3.44          | 0.00150 | 0.00841 | 4.00              | 0.65            | Sft2d2        |
| 1425097_a_at       | -3.44          | 0.00151 | 0.00843 | 8.87              | 0.57            | Zfp106        |
| 1456590_x_at       | -3.43          | 0.00151 | 0.00845 | 12.34             | 0.32            | Akr1b3        |
| 1428243_at         | -3.43          | 0.00152 | 0.00846 | 4.61              | 0.72            | 1700021K19Rik |
| 1426404_a_at       | -3.43          | 0.00152 | 0.00846 | 11.47             | 0.37            | Rnf11         |
| 1427268_at         | -3.43          | 0.00152 | 0.00848 | 3.51              | 1.03            | Flg           |
| 1418505_at         | -3.43          | 0.00153 | 0.00849 | 12.08             | 0.35            | Nudt4         |
| 1428781_at         | -3.43          | 0.00154 | 0.00857 | 4.89              | 3.05            | Dmkn          |
| 1418274_at         | -3.43          | 0.00155 | 0.00860 | 10.16             | 0.40            | Nutf2         |
| 1435188_at         | -3.42          | 0.00156 | 0.00863 | 4.38              | 1.11            | Gm129         |
| 1435241_at         | -3.42          | 0.00157 | 0.00865 | 8.32              | 0.60            | Heatr5a       |
| 1452467_at         | -3.42          | 0.00157 | 0.00865 | 6.39              | 0.77            | Mmab          |
| 1416474_at         | -3.42          | 0.00158 | 0.00870 | 8.88              | 0.57            | Nope          |
| 1442844_at         | -3.42          | 0.00158 | 0.00870 | 4.60              | 0.78            | A830052D11Rik |
| 1450213_at         | -3.42          | 0.00159 | 0.00875 | 2.87              | 0.54            | Pde7b         |
| 1421290_at         | -3.42          | 0.00159 | 0.00875 | 10.75             | 0.60            | Hspb7         |
| 1451141_at         | -3.41          | 0.00160 | 0.00878 | 4.72              | 0.82            | Mettl8        |
| 1439150_x_at       | -3.41          | 0.00161 | 0.00882 | 3.41              | 0.67            | Grtp1         |
| 1420586_at         | -3.41          | 0.00162 | 0.00888 | 2.86              | 0.50            | 2900054J07Rik |
| 1430718_s_at       | -3.41          | 0.00163 | 0.00892 | 4.13              | 0.72            | Dph4          |
| 1424996_at         | -3.41          | 0.00163 | 0.00892 | 7.51              | 0.68            | Cflar         |
| 1434883_at         | -3.41          | 0.00163 | 0.00892 | 8.38              | 0.52            | Mtdh          |
| 1416023_at         | -3.41          | 0.00163 | 0.00892 | 13.10             | 0.31            | Fabp3         |
| 1431063_at         | -3.41          | 0.00163 | 0.00893 | 3.87              | 0.65            | NA            |
| 1436644_x_at       | -3.40          | 0.00165 | 0.00899 | 3.74              | 0.71            | Tmem25        |
| 1423925_at         | -3.40          | 0.00165 | 0.00899 | 7.80              | 0.58            | Dhx16         |
| 1435760_at         | -3.40          | 0.00165 | 0.00899 | 3.10              | 1.12            | Csta          |
| 1418370_at         | -3.40          | 0.00165 | 0.00900 | 11.76             | 0.50            | Tnnc1         |

| Probe <sup>1</sup> | t <sup>2</sup> | p-value | q-value | Mean <sup>3</sup> | FC <sup>4</sup> | Symbol        |
|--------------------|----------------|---------|---------|-------------------|-----------------|---------------|
| 1434229_a_at       | -3.40          | 0.00165 | 0.00900 | 10.56             | 0.40            | Polb          |
| 1452094_at         | -3.40          | 0.00166 | 0.00902 | 6.68              | 0.70            | P4ha1         |
| 1422797_at         | -3.40          | 0.00166 | 0.00902 | 9.71              | 0.41            | Mapbpip       |
| 1455372_at         | -3.40          | 0.00166 | 0.00902 | 10.19             | 0.39            | Cpeb3         |
| 1435334_at         | -3.40          | 0.00167 | 0.00907 | 3.55              | 0.57            | Ttc7          |
| 1421937_at         | -3.40          | 0.00167 | 0.00908 | 3.72              | 0.69            | Dapp1         |
| 1426586_at         | -3.40          | 0.00168 | 0.00912 | 11.37             | 0.38            | Slc25a11      |
| 1418395_at         | -3.40          | 0.00168 | 0.00913 | 9.57              | 0.52            | Slc47a1       |
| 1426122_a_at       | -3.39          | 0.00169 | 0.00915 | 8.97              | 0.55            | Coro6         |
| 1439859_at         | -3.39          | 0.00172 | 0.00928 | 9.07              | 0.47            | 9630033F20Rik |
| 1415674_a_at       | -3.39          | 0.00172 | 0.00930 | 8.14              | 0.55            | Trappc4       |
| 1454256_s_at       | -3.38          | 0.00173 | 0.00934 | 9.15              | 0.51            | 1700113I22Rik |
| 1417035_at         | -3.38          | 0.00173 | 0.00934 | 5.23              | 0.73            | Sac3d1        |
| 1419606_a_at       | -3.38          | 0.00174 | 0.00935 | 11.44             | 0.53            | Tnnt1         |
| 1434534_at         | -3.38          | 0.00174 | 0.00935 | 4.31              | 1.24            | Dsc3          |
| 1434944_at         | -3.38          | 0.00175 | 0.00939 | 9.03              | 0.52            | Dmpk          |
| 1428104_at         | -3.38          | 0.00176 | 0.00943 | 3.87              | 0.63            | Tpx2          |
| 1436641_at         | -3.38          | 0.00177 | 0.00946 | 3.83              | 0.67            | AI415730      |
| 1455548_at         | -3.38          | 0.00177 | 0.00948 | 7.33              | 0.74            | Dlgap4        |
| 1452363_a_at       | -3.38          | 0.00178 | 0.00949 | 11.15             | 0.52            | Atp2a2        |
| 1448283_a_at       | -3.38          | 0.00178 | 0.00949 | 10.65             | 0.43            | Uba2          |
| 1448853_at         | -3.38          | 0.00178 | 0.00949 | 11.17             | 0.37            | Synj2bp       |
| 1416221_at         | -3.38          | 0.00178 | 0.00949 | 9.59              | 0.45            | Fstl1         |
| 1434274_at         | -3.37          | 0.00180 | 0.00958 | 10.08             | 0.45            | Mycbp2        |
| 1451871_a_at       | -3.37          | 0.00181 | 0.00964 | 7.89              | 0.62            | Ghr           |
| 1423381_at         | -3.37          | 0.00182 | 0.00968 | 3.47              | 0.70            | 4921521F21Rik |
| 1434357_a_at       | -3.37          | 0.00182 | 0.00968 | 3.81              | 0.66            | Kpnb1         |
| 1438483_at         | -3.37          | 0.00183 | 0.00970 | 7.16              | 0.78            | Nos1          |
| 1450740_a_at       | -3.36          | 0.00184 | 0.00974 | 10.17             | 0.39            | Mapre1        |
| 1428198_at         | -3.36          | 0.00186 | 0.00982 | 7.76              | 0.66            | Adal          |
| 1425228_a_at       | -3.36          | 0.00186 | 0.00982 | 6.72              | 0.71            | Dguok         |
| 1452286_at         | -3.36          | 0.00187 | 0.00986 | 11.53             | 0.36            | Slain2        |
| 1432129_a_at       | -3.36          | 0.00187 | 0.00988 | 4.98              | 0.86            | Prrx1         |
| 1451360_at         | -3.36          | 0.00188 | 0.00988 | 5.35              | 0.83            | Ergic2        |

**Table S3b. Footnote**

Gene lists were generated using the Cyber-T method, with only genes with a *q*-value < 0.01 presented.

<sup>1</sup> *Probe* represents the Affymetrix probe set identifier.

<sup>2</sup> *t* represents the t-statistic output from the Cyber-T method.

<sup>3</sup> *Mean* represents the mean expression signal after normalization.

<sup>4</sup> *FC* represents the log<sub>2</sub> fold change in normalized signals.

**Table S4a.** Genes upregulated in white adipose tissue of *S6K<sup>-/-</sup>* mice compared to wild type mice.

| Probe <sup>1</sup> | t <sup>2</sup> | p-value  | q-value  | Mean <sup>3</sup> | FC <sup>4</sup> | Symbol        |
|--------------------|----------------|----------|----------|-------------------|-----------------|---------------|
| 1443621_at         | 23.68          | 2.06E-21 | 3.23E-17 | 6.00              | 5.53            | Xaf1          |
| 1448231_at         | 12.14          | 2.57E-13 | 1.35E-09 | 7.78              | 4.04            | Fkbp5         |
| 1416125_at         | 10.85          | 4.40E-12 | 1.73E-08 | 9.68              | 2.53            | Fkbp5         |
| 1438059_at         | 10.58          | 8.14E-12 | 2.56E-08 | 5.75              | 3.41            | 1700011I03Rik |
| 1457117_at         | 9.84           | 4.74E-11 | 1.24E-07 | 5.35              | 3.91            | Nfe2l2        |
| 1455930_at         | 9.63           | 7.77E-11 | 1.74E-07 | 4.81              | 3.02            | NA            |
| 1450505_a_at       | 9.12           | 2.79E-10 | 4.38E-07 | 7.13              | 3.92            | 1810015C04Rik |
| 1429235_at         | 8.69           | 8.28E-10 | 1.08E-06 | 9.43              | 1.96            | Galnt12       |
| 1453410_at         | 8.32           | 2.12E-09 | 2.38E-06 | 6.63              | 3.51            | Angptl4       |
| 1433711_s_at       | 8.19           | 2.97E-09 | 3.11E-06 | 10.27             | 1.34            | Sesn1         |
| 1440506_at         | 8.07           | 4.15E-09 | 3.44E-06 | 5.82              | 2.95            | Slc7a2        |
| 1421289_at         | 8.06           | 4.17E-09 | 3.44E-06 | 5.75              | 3.31            | Hspb7         |
| 1444746_at         | 7.91           | 6.28E-09 | 4.56E-06 | 7.58              | 2.82            | Ptbp2         |
| 1416927_at         | 7.89           | 6.57E-09 | 4.56E-06 | 7.81              | 3.20            | Trp53inp1     |
| 1417522_at         | 7.88           | 6.77E-09 | 4.56E-06 | 7.60              | 4.11            | Fbxo32        |
| 1456717_at         | 7.88           | 6.82E-09 | 4.56E-06 | 5.50              | 3.00            | Tead1         |
| 1443116_at         | 7.79           | 8.55E-09 | 5.37E-06 | 5.77              | 2.39            | Psme4         |
| 1438931_s_at       | 7.71           | 1.07E-08 | 6.41E-06 | 11.69             | 1.26            | Sesn1         |
| 1438295_at         | 7.67           | 1.18E-08 | 6.60E-06 | 5.28              | 2.07            | Glcci1        |
| 1428352_at         | 7.60           | 1.43E-08 | 7.62E-06 | 7.21              | 1.85            | Arrdc2        |
| 1453817_at         | 7.60           | 1.45E-08 | 7.62E-06 | 5.25              | 1.98            | Abca6         |
| 1436763_a_at       | 7.55           | 1.67E-08 | 8.08E-06 | 8.39              | 1.58            | Klf9          |
| 1434202_a_at       | 7.53           | 1.73E-08 | 8.08E-06 | 8.04              | 1.95            | BC055107      |
| 1418507_s_at       | 7.53           | 1.75E-08 | 8.08E-06 | 8.93              | 2.30            | Socs2         |
| 1425274_at         | 7.51           | 1.85E-08 | 8.25E-06 | 5.56              | 2.87            | Asph          |
| 1422904_at         | 7.50           | 1.89E-08 | 8.25E-06 | 8.37              | 2.35            | Fmo2          |
| 1434777_at         | 7.48           | 1.97E-08 | 8.35E-06 | 4.89              | 2.22            | Mycl1         |
| 1438796_at         | 7.43           | 2.27E-08 | 9.23E-06 | 6.02              | 3.17            | Nr4a3         |
| 1456341_a_at       | 7.37           | 2.69E-08 | 1.02E-05 | 12.84             | 1.09            | Klf9          |
| 1423434_at         | 7.37           | 2.71E-08 | 1.02E-05 | 6.08              | 2.35            | Tead1         |
| 1418932_at         | 7.36           | 2.74E-08 | 1.02E-05 | 5.72              | 2.26            | Nfil3         |
| 1441326_at         | 7.26           | 3.65E-08 | 1.32E-05 | 6.44              | 2.15            | Cp            |
| 1424683_at         | 7.25           | 3.74E-08 | 1.32E-05 | 11.74             | 2.62            | 1810015C04Rik |
| 1454699_at         | 7.24           | 3.79E-08 | 1.32E-05 | 10.87             | 1.33            | Sesn1         |
| 1457347_at         | 7.16           | 4.76E-08 | 1.45E-05 | 5.57              | 3.95            | Ryr1          |
| 1447891_at         | 7.15           | 4.96E-08 | 1.47E-05 | 4.97              | 2.83            | Tacc2         |
| 1452124_at         | 7.13           | 5.11E-08 | 1.49E-05 | 7.83              | 2.42            | Ank3          |
| 1455377_at         | 7.12           | 5.37E-08 | 1.53E-05 | 4.96              | 2.19            | Ttll7         |
| 1429236_at         | 7.09           | 5.82E-08 | 1.63E-05 | 10.30             | 1.62            | Galnt12       |
| 1436555_at         | 7.07           | 6.07E-08 | 1.67E-05 | 7.14              | 2.73            | Slc7a2        |
| 1443954_at         | 7.03           | 6.87E-08 | 1.80E-05 | 5.77              | 2.23            | Rad18         |
| 1428111_at         | 7.00           | 7.31E-08 | 1.83E-05 | 5.81              | 2.45            | Slc38a4       |
| 1442018_at         | 7.00           | 7.44E-08 | 1.83E-05 | 4.59              | 2.51            | AI426953      |
| 1452345_at         | 7.00           | 7.47E-08 | 1.83E-05 | 6.66              | 4.86            | Lmod2         |
| 1422557_s_at       | 7.00           | 7.47E-08 | 1.83E-05 | 12.69             | 1.85            | Mt1           |
| 1439836_at         | 6.97           | 7.99E-08 | 1.93E-05 | 5.62              | 3.89            | Asb15         |
| 1438704_at         | 6.94           | 8.76E-08 | 2.09E-05 | 8.99              | 6.99            | Trim63        |
| 1444018_at         | 6.92           | 9.29E-08 | 2.12E-05 | 6.62              | 1.94            | B930098A02Rik |
| 1457438_at         | 6.92           | 9.33E-08 | 2.12E-05 | 4.70              | 1.69            | NA            |
| 1460147_at         | 6.87           | 1.06E-07 | 2.36E-05 | 5.40              | 2.36            | A730009E18Rik |
| 1460515_at         | 6.86           | 1.08E-07 | 2.36E-05 | 4.32              | 1.83            | 8430419K02Rik |

| Probe <sup>1</sup>   | t <sup>2</sup> | p-value  | q-value  | Mean <sup>3</sup> | FC <sup>4</sup> | Symbol        |
|----------------------|----------------|----------|----------|-------------------|-----------------|---------------|
| ←-PyrCarbMur/L09192_ | 6.84           | 1.15E-07 | 2.42E-05 | 6.97              | 3.29            | Pcx           |
| 1428288_at           | 6.83           | 1.17E-07 | 2.42E-05 | 12.68             | 1.09            | 2310051E17Rik |
| 1428529_at           | 6.82           | 1.21E-07 | 2.46E-05 | 8.96              | 1.94            | 2810026P18Rik |
| 1453332_at           | 6.81           | 1.25E-07 | 2.51E-05 | 7.24              | 2.10            | 2410002O22Rik |
| 1455358_at           | 6.78           | 1.35E-07 | 2.68E-05 | 4.69              | 2.83            | A2bp1         |
| 1458455_at           | 6.78           | 1.37E-07 | 2.68E-05 | 5.51              | 2.69            | Abra          |
| 1423660_at           | 6.77           | 1.40E-07 | 2.68E-05 | 8.15              | 1.97            | Ctdsp2        |
| 1418288_at           | 6.76           | 1.45E-07 | 2.72E-05 | 11.81             | 1.14            | Lpin1         |
| 1417969_at           | 6.76           | 1.46E-07 | 2.72E-05 | 7.09              | 2.31            | Fbxo31        |
| 1433836_a_at         | 6.74           | 1.53E-07 | 2.76E-05 | 11.43             | 1.92            | 8430408G22Rik |
| 1418314_a_at         | 6.74           | 1.53E-07 | 2.76E-05 | 4.19              | 2.87            | A2bp1         |
| 1433837_at           | 6.74           | 1.54E-07 | 2.76E-05 | 10.73             | 2.22            | 8430408G22Rik |
| 1439795_at           | 6.73           | 1.59E-07 | 2.78E-05 | 9.99              | 2.23            | Gpr64         |
| 1428926_at           | 6.72           | 1.59E-07 | 2.78E-05 | 6.01              | 1.96            | 1110003O08Rik |
| 1416053_at           | 6.71           | 1.66E-07 | 2.86E-05 | 4.21              | 1.77            | Lrrn1         |
| 1426008_a_at         | 6.69           | 1.73E-07 | 2.96E-05 | 3.61              | 1.89            | Slc7a2        |
| 1426516_a_at         | 6.69           | 1.76E-07 | 2.97E-05 | 12.16             | 1.12            | Lpin1         |
| 1454752_at           | 6.67           | 1.84E-07 | 3.04E-05 | 6.11              | 2.58            | Rbm24         |
| 1449109_at           | 6.66           | 1.88E-07 | 3.06E-05 | 9.44              | 1.68            | Socs2         |
| 1416255_at           | 6.66           | 1.89E-07 | 3.06E-05 | 4.41              | 1.71            | Gja4          |
| 1452418_at           | 6.62           | 2.12E-07 | 3.39E-05 | 12.30             | 1.55            | 1200016E24Rik |
| 1422153_a_at         | 6.62           | 2.16E-07 | 3.42E-05 | 5.53              | 3.85            | Asb11         |
| 1444295_at           | 6.59           | 2.34E-07 | 3.68E-05 | 5.36              | 1.75            | Neo1          |
| 1419157_at           | 6.56           | 2.54E-07 | 3.87E-05 | 4.37              | 2.36            | Sox4          |
| 1430462_at           | 6.54           | 2.66E-07 | 3.98E-05 | 5.34              | 2.73            | 2310002L09Rik |
| 1429895_at           | 6.54           | 2.66E-07 | 3.98E-05 | 5.69              | 1.78            | 2310010G23Rik |
| 1448747_at           | 6.53           | 2.78E-07 | 4.10E-05 | 9.57              | 2.75            | Fbxo32        |
| 1418589_a_at         | 6.52           | 2.80E-07 | 4.10E-05 | 6.28              | 3.65            | Mlf1          |
| 1434817_s_at         | 6.52           | 2.83E-07 | 4.12E-05 | 8.08              | 1.94            | 4930535B03Rik |
| 1422648_at           | 6.52           | 2.86E-07 | 4.12E-05 | 4.74              | 2.08            | Slc7a2        |
| 1435813_at           | 6.50           | 2.94E-07 | 4.16E-05 | 5.28              | 3.32            | Mypn          |
| 1454005_at           | 6.50           | 2.98E-07 | 4.18E-05 | 3.75              | 1.14            | Fmo2          |
| 1444564_at           | 6.48           | 3.18E-07 | 4.43E-05 | 5.76              | 2.22            | Apod          |
| 1438350_at           | 6.46           | 3.32E-07 | 4.57E-05 | 8.88              | 2.35            | Gpr64         |
| 1421534_at           | 6.44           | 3.51E-07 | 4.75E-05 | 9.00              | 1.70            | LOC14210      |
| -PyrCarbMur/L09192_M | 6.44           | 3.57E-07 | 4.75E-05 | 7.64              | 2.73            | Pcx           |
| 1428332_at           | 6.44           | 3.57E-07 | 4.75E-05 | 8.58              | 1.34            | Pik3ip1       |
| 1458660_at           | 6.41           | 3.87E-07 | 5.07E-05 | 4.69              | 3.02            | AI414330      |
| 1432007_s_at         | 6.40           | 3.97E-07 | 5.15E-05 | 8.99              | 1.60            | Ap2a2         |
| 1421413_a_at         | 6.35           | 4.49E-07 | 5.74E-05 | 7.87              | 2.63            | Pdlim5        |
| 1445188_at           | 6.35           | 4.58E-07 | 5.81E-05 | 4.77              | 2.06            | Gphn          |
| 1453582_at           | 6.34           | 4.73E-07 | 5.90E-05 | 4.21              | 1.64            | Chka          |
| 1422997_s_at         | 6.31           | 5.03E-07 | 6.12E-05 | 6.82              | 2.68            | Acot2         |
| 1459887_at           | 6.31           | 5.11E-07 | 6.14E-05 | 4.64              | 1.81            | Ube4a         |
| 1441964_at           | 6.30           | 5.22E-07 | 6.21E-05 | 6.23              | 1.70            | 1110003F05Rik |
| 1440417_at           | 6.29           | 5.36E-07 | 6.33E-05 | 6.79              | 1.99            | D19Ert409e    |
| 1437523_s_at         | 6.28           | 5.55E-07 | 6.46E-05 | 6.51              | 2.89            | Sgcg          |
| 1416075_at           | 6.28           | 5.59E-07 | 6.46E-05 | 9.07              | 1.40            | Sav1          |
| 1428289_at           | 6.27           | 5.64E-07 | 6.46E-05 | 11.67             | 1.06            | 2310051E17Rik |
| 1453435_a_at         | 6.27           | 5.67E-07 | 6.46E-05 | 10.79             | 1.42            | Fmo2          |
| 1427200_at           | 6.27           | 5.68E-07 | 6.46E-05 | 9.40              | 1.18            | Zranb1        |
| 1433783_at           | 6.22           | 6.48E-07 | 7.22E-05 | 8.85              | 1.98            | Ldb3          |
| 1436326_at           | 6.19           | 7.15E-07 | 7.80E-05 | 8.87              | 1.46            | Rora          |



| Probe <sup>1</sup> | t <sup>2</sup> | p-value  | q-value  | Mean <sup>3</sup> | FC <sup>4</sup> | Symbol        |
|--------------------|----------------|----------|----------|-------------------|-----------------|---------------|
| 1455773_at         | 6.19           | 7.20E-07 | 7.80E-05 | 9.07              | 1.45            | NA            |
| 1424638_at         | 6.18           | 7.41E-07 | 7.97E-05 | 10.04             | 1.50            | Cdkn1a        |
| 1435459_at         | 6.16           | 7.74E-07 | 8.27E-05 | 10.67             | 1.35            | Fmo2          |
| 1425745_a_at       | 6.14           | 8.16E-07 | 8.66E-05 | 10.18             | 1.72            | Tacc2         |
| 1455418_at         | 6.13           | 8.44E-07 | 8.85E-05 | 9.76              | 1.05            | NA            |
| 1416572_at         | 6.13           | 8.51E-07 | 8.85E-05 | 9.42              | 1.31            | Mmp14         |
| 1438946_at         | 6.13           | 8.60E-07 | 8.89E-05 | 7.13              | 2.06            | Pdgfra        |
| 1442277_at         | 6.12           | 8.73E-07 | 8.91E-05 | 4.71              | 2.26            | Chka          |
| 1438824_at         | 6.11           | 8.94E-07 | 8.98E-05 | 4.08              | 1.31            | Slc20a1       |
| 1425282_at         | 6.11           | 8.97E-07 | 8.98E-05 | 4.71              | 2.43            | Rnf144b       |
| 1457321_at         | 6.09           | 9.51E-07 | 9.40E-05 | 5.95              | 1.93            | D130037M23Rik |
| 1455165_at         | 6.08           | 9.64E-07 | 9.47E-05 | 9.46              | 1.23            | Rora          |
| 1428025_s_at       | 6.07           | 9.92E-07 | 9.66E-05 | 6.63              | 1.71            | Pitpnc1       |
| 1456182_x_at       | 6.06           | 1.02E-06 | 9.71E-05 | 4.74              | 2.97            | Mela          |
| 1440179_x_at       | 6.06           | 1.03E-06 | 9.71E-05 | 7.71              | 1.62            | Rnf217        |
| 1444139_at         | 6.06           | 1.03E-06 | 9.71E-05 | 6.40              | 2.22            | Ddit4l        |
| 1424649_a_at       | 6.06           | 1.03E-06 | 9.71E-05 | 5.05              | 2.12            | Tspan8        |
| 1449065_at         | 6.05           | 1.05E-06 | 9.85E-05 | 8.09              | 2.88            | Acot1         |
| 1443138_at         | 6.04           | 1.10E-06 | 0.00010  | 5.75              | 1.65            | Sult5a1       |
| 1421037_at         | 6.03           | 1.13E-06 | 0.00010  | 6.02              | 2.35            | Npas2         |
| 1440053_at         | 6.02           | 1.16E-06 | 0.00011  | 4.28              | 1.47            | Adam12        |
| 1448595_a_at       | 6.02           | 1.17E-06 | 0.00011  | 8.53              | 1.52            | Bex1          |
| 1451372_a_at       | 6.02           | 1.17E-06 | 0.00011  | 6.32              | 3.90            | Art1          |
| 1419621_at         | 6.00           | 1.22E-06 | 0.00011  | 5.80              | 3.02            | Ankrd2        |
| 1427052_at         | 5.99           | 1.26E-06 | 0.00011  | 9.71              | 1.62            | Acacb         |
| 1434927_at         | 5.99           | 1.28E-06 | 0.00011  | 8.21              | 2.10            | Hspb7         |
| 1423608_at         | 5.98           | 1.30E-06 | 0.00011  | 9.10              | 1.35            | Itm2a         |
| 1453628_s_at       | 5.97           | 1.32E-06 | 0.00011  | 5.80              | 3.00            | Lrrc2         |
| 1422905_s_at       | 5.96           | 1.37E-06 | 0.00012  | 10.23             | 1.61            | Fmo2          |
| 1446001_at         | 5.96           | 1.38E-06 | 0.00012  | 4.97              | 1.62            | Reps1         |
| 1440104_at         | 5.96           | 1.39E-06 | 0.00012  | 6.89              | 2.45            | Ranbp2        |
| 1428306_at         | 5.95           | 1.40E-06 | 0.00012  | 10.69             | 1.73            | Ddit4         |
| 1459238_at         | 5.95           | 1.41E-06 | 0.00012  | 5.84              | 1.57            | NA            |
| 1426812_a_at       | 5.94           | 1.46E-06 | 0.00012  | 9.41              | 1.79            | 9130404D14Rik |
| 1458129_at         | 5.93           | 1.48E-06 | 0.00012  | 6.98              | 1.54            | Rora          |
| 1416332_at         | 5.93           | 1.50E-06 | 0.00012  | 9.30              | 1.49            | Cirbp         |
| 1439332_at         | 5.92           | 1.54E-06 | 0.00012  | 5.74              | 1.85            | Ddit4l        |
| 1426114_at         | 5.91           | 1.56E-06 | 0.00012  | 12.18             | 1.16            | Hnrpab        |
| 1448482_at         | 5.89           | 1.66E-06 | 0.00013  | 6.70              | 2.54            | Slc39a8       |
| 1436871_at         | 5.89           | 1.67E-06 | 0.00013  | 7.98              | 1.79            | Sfrs7         |
| 1432794_at         | 5.89           | 1.67E-06 | 0.00013  | 3.78              | 1.24            | 2310058F05Rik |
| 1451447_at         | 5.88           | 1.73E-06 | 0.00013  | 6.55              | 2.28            | Cuedc1        |
| 1456456_x_at       | 5.87           | 1.76E-06 | 0.00013  | 4.47              | 2.17            | Mela          |
| 1429783_at         | 5.87           | 1.80E-06 | 0.00014  | 9.79              | 3.60            | Pdlim5        |
| 1446603_at         | 5.87           | 1.80E-06 | 0.00014  | 5.20              | 1.66            | NA            |
| 1437137_at         | 5.86           | 1.83E-06 | 0.00014  | 6.40              | 1.85            | 6430550H21Rik |
| 1418745_at         | 5.85           | 1.88E-06 | 0.00014  | 6.92              | 1.79            | Omd           |
| 1423447_at         | 5.83           | 1.98E-06 | 0.00015  | 10.40             | 1.03            | Clpx          |
| 1458368_at         | 5.83           | 2.00E-06 | 0.00015  | 8.39              | 5.30            | Myh4          |
| 1442258_at         | 5.83           | 2.01E-06 | 0.00015  | 5.79              | 1.78            | NA            |
| 1451047_at         | 5.81           | 2.12E-06 | 0.00015  | 6.68              | 1.65            | Itm2a         |
| 1444749_at         | 5.81           | 2.12E-06 | 0.00015  | 4.37              | 1.98            | NA            |
| 1416371_at         | 5.81           | 2.13E-06 | 0.00015  | 10.39             | 1.67            | Apod          |

| Probe <sup>1</sup> | t <sup>2</sup> | p-value  | q-value | Mean <sup>3</sup> | FC <sup>4</sup> | Symbol        |
|--------------------|----------------|----------|---------|-------------------|-----------------|---------------|
| 1459557_at         | 5.80           | 2.17E-06 | 0.00015 | 5.92              | 1.94            | Zbtb16        |
| 1451612_at         | 5.80           | 2.18E-06 | 0.00015 | 4.72              | 2.49            | Mt1           |
| 1458460_at         | 5.79           | 2.20E-06 | 0.00015 | 5.90              | 1.87            | Stim1         |
| 1443823_s_at       | 5.79           | 2.21E-06 | 0.00015 | 13.67             | 0.70            | Atp1a2        |
| 1444333_at         | 5.79           | 2.24E-06 | 0.00016 | 6.50              | 1.69            | NA            |
| 1421254_a_at       | 5.79           | 2.25E-06 | 0.00016 | 4.64              | 2.11            | Sgcg          |
| 1439249_at         | 5.78           | 2.30E-06 | 0.00016 | 6.05              | 1.55            | Wac           |
| 1450276_a_at       | 5.78           | 2.31E-06 | 0.00016 | 4.89              | 1.46            | Scin          |
| 1427312_at         | 5.74           | 2.55E-06 | 0.00017 | 7.39              | 4.17            | Cmya5         |
| 1422264_s_at       | 5.74           | 2.57E-06 | 0.00017 | 10.11             | 1.18            | Klf9          |
| 1457275_at         | 5.74           | 2.58E-06 | 0.00017 | 8.58              | 1.94            | Dmn           |
| 1449398_at         | 5.73           | 2.62E-06 | 0.00018 | 5.50              | 2.76            | Rpl3l         |
| 1444083_at         | 5.72           | 2.71E-06 | 0.00018 | 6.94              | 4.30            | Ttn           |
| 1451751_at         | 5.72           | 2.75E-06 | 0.00018 | 5.57              | 2.22            | Ddit4l        |
| 1439753_x_at       | 5.70           | 2.85E-06 | 0.00019 | 6.34              | 1.87            | Six4          |
| 1416041_at         | 5.70           | 2.86E-06 | 0.00019 | 12.47             | 1.27            | Sgk1          |
| 1420583_a_at       | 5.70           | 2.87E-06 | 0.00019 | 9.00              | 1.12            | Rora          |
| 1429463_at         | 5.70           | 2.88E-06 | 0.00019 | 7.03              | 1.70            | Prkaa2        |
| 1450468_at         | 5.70           | 2.92E-06 | 0.00019 | 8.07              | 1.47            | Myoc          |
| 1445717_at         | 5.69           | 3.01E-06 | 0.00019 | 5.12              | 1.55            | Luc7l2        |
| 1433438_x_at       | 5.68           | 3.03E-06 | 0.00019 | 5.01              | 3.11            | Mela          |
| 1449733_s_at       | 5.68           | 3.04E-06 | 0.00019 | 7.94              | 1.48            | Siah1a        |
| 1421679_a_at       | 5.68           | 3.08E-06 | 0.00020 | 4.77              | 1.65            | Cdkn1a        |
| 1420884_at         | 5.67           | 3.12E-06 | 0.00020 | 5.22              | 3.45            | Sln           |
| 1423238_at         | 5.66           | 3.24E-06 | 0.00020 | 4.20              | 2.08            | Itgb1bp2      |
| 1435504_at         | 5.66           | 3.26E-06 | 0.00020 | 7.30              | 1.67            | Clip4         |
| 1427595_at         | 5.66           | 3.28E-06 | 0.00020 | 5.44              | 2.40            | Acaca         |
| 1441150_x_at       | 5.64           | 3.42E-06 | 0.00021 | 10.59             | 1.24            | NA            |
| 1451743_at         | 5.64           | 3.45E-06 | 0.00021 | 6.29              | 1.53            | D19Wsu162e    |
| 1442744_at         | 5.64           | 3.46E-06 | 0.00021 | 9.27              | 1.55            | NA            |
| 1416084_at         | 5.63           | 3.56E-06 | 0.00022 | 9.12              | 1.25            | Zfand5        |
| 1448327_at         | 5.62           | 3.61E-06 | 0.00022 | 6.14              | 3.68            | Actn2         |
| 1446148_x_at       | 5.60           | 3.81E-06 | 0.00023 | 7.71              | 1.74            | NA            |
| 1449356_at         | 5.60           | 3.83E-06 | 0.00023 | 8.10              | 4.07            | Asb5          |
| 1446899_at         | 5.60           | 3.88E-06 | 0.00023 | 3.61              | 0.95            | NA            |
| 1447713_at         | 5.58           | 4.10E-06 | 0.00024 | 4.42              | 2.28            | Tpm1          |
| 1436898_at         | 5.56           | 4.29E-06 | 0.00025 | 10.41             | 1.33            | Sfpq          |
| 1426235_a_at       | 5.55           | 4.40E-06 | 0.00026 | 12.08             | 1.13            | Glul          |
| 1446068_at         | 5.55           | 4.42E-06 | 0.00026 | 6.73              | 2.12            | Adk           |
| 1436325_at         | 5.55           | 4.46E-06 | 0.00026 | 6.38              | 1.62            | Rora          |
| 1419440_at         | 5.55           | 4.48E-06 | 0.00026 | 5.09              | 2.52            | Trim54        |
| 1454288_at         | 5.54           | 4.62E-06 | 0.00027 | 5.43              | 2.03            | 5830468K08Rik |
| 1418951_at         | 5.52           | 4.87E-06 | 0.00027 | 5.78              | 3.24            | Txlnb         |
| 1443167_at         | 5.51           | 4.94E-06 | 0.00028 | 5.66              | 1.75            | Rnf12         |
| 1426337_a_at       | 5.51           | 4.94E-06 | 0.00028 | 3.48              | 1.11            | Tead4         |
| 1418278_at         | 5.51           | 4.94E-06 | 0.00028 | 5.91              | 2.30            | Apoc3         |
| 1450459_at         | 5.51           | 5.01E-06 | 0.00028 | 5.74              | 1.86            | 2010106G01Rik |
| 1422088_at         | 5.51           | 5.03E-06 | 0.00028 | 3.75              | 1.09            | Mycl1         |
| 1438815_at         | 5.50           | 5.06E-06 | 0.00028 | 4.80              | 1.28            | Hist2h2aa2    |
| 1451628_a_at       | 5.50           | 5.07E-06 | 0.00028 | 5.85              | 1.69            | Ank3          |
| 1429050_at         | 5.50           | 5.09E-06 | 0.00028 | 9.42              | 1.43            | Chic2         |
| 1419816_s_at       | 5.50           | 5.10E-06 | 0.00028 | 9.13              | 2.75            | Errfi1        |
| 1453976_at         | 5.50           | 5.15E-06 | 0.00028 | 5.73              | 1.70            | 4432414F05Rik |

| Probe <sup>1</sup> | t <sup>2</sup> | p-value  | q-value | Mean <sup>3</sup> | FC <sup>4</sup> | Symbol        |
|--------------------|----------------|----------|---------|-------------------|-----------------|---------------|
| 1454038_at         | 5.50           | 5.16E-06 | 0.00028 | 3.48              | 0.97            | 4833403I15Rik |
| 1423661_s_at       | 5.49           | 5.21E-06 | 0.00028 | 6.26              | 1.60            | Ctdsp2        |
| 1444503_at         | 5.49           | 5.31E-06 | 0.00028 | 4.80              | 1.35            | Gbas          |
| 1445235_at         | 5.48           | 5.42E-06 | 0.00028 | 4.96              | 1.59            | Ythdf3        |
| 1439087_a_at       | 5.47           | 5.57E-06 | 0.00029 | 6.68              | 1.59            | 5830455E04Rik |
| 1424178_at         | 5.47           | 5.58E-06 | 0.00029 | 4.46              | 2.45            | Tmem38a       |
| 1446147_at         | 5.47           | 5.65E-06 | 0.00029 | 8.40              | 1.65            | NA            |
| 1428942_at         | 5.46           | 5.67E-06 | 0.00029 | 12.06             | 1.95            | Mt2           |
| 1442049_at         | 5.46           | 5.69E-06 | 0.00029 | 4.34              | 1.29            | Trf           |
| 1444494_at         | 5.45           | 5.89E-06 | 0.00030 | 6.34              | 3.84            | Kbtbd10       |
| 1446102_at         | 5.44           | 6.06E-06 | 0.00031 | 5.77              | 1.69            | D9Ertd292e    |
| 1419717_at         | 5.44           | 6.13E-06 | 0.00031 | 6.06              | 1.53            | Sema3e        |
| 1426607_at         | 5.44           | 6.14E-06 | 0.00031 | 7.96              | 1.48            | EG633640      |
| 1454299_at         | 5.43           | 6.17E-06 | 0.00031 | 3.46              | 1.01            | 4833422B07Rik |
| 1433634_at         | 5.42           | 6.36E-06 | 0.00032 | 9.35              | 1.23            | Irf2bp2       |
| 1418952_at         | 5.42           | 6.39E-06 | 0.00032 | 5.71              | 2.21            | Txlnb         |
| 1420693_at         | 5.42           | 6.45E-06 | 0.00032 | 6.28              | 2.72            | Myom1         |
| 1427747_a_at       | 5.42           | 6.49E-06 | 0.00032 | 5.03              | 1.58            | Lcn2          |
| 1424034_at         | 5.42           | 6.50E-06 | 0.00032 | 8.05              | 1.33            | Rora          |
| 1453698_at         | 5.41           | 6.65E-06 | 0.00032 | 8.71              | 1.67            | 6030451C04Rik |
| 1429399_at         | 5.40           | 6.77E-06 | 0.00033 | 10.45             | 1.91            | Rnf125        |
| 1416926_at         | 5.40           | 6.88E-06 | 0.00033 | 11.90             | 1.24            | Trp53inp1     |
| 1436952_at         | 5.39           | 6.93E-06 | 0.00033 | 4.67              | 1.58            | Klf9          |
| 1449007_at         | 5.39           | 7.04E-06 | 0.00034 | 10.30             | 1.13            | Btg3          |
| 1436566_at         | 5.39           | 7.12E-06 | 0.00034 | 9.15              | 1.35            | Rab40b        |
| 1425023_at         | 5.38           | 7.19E-06 | 0.00034 | 7.91              | 1.39            | Usp3          |
| 1443755_at         | 5.38           | 7.21E-06 | 0.00034 | 2.89              | 0.95            | NA            |
| 1430798_x_at       | 5.37           | 7.45E-06 | 0.00035 | 6.28              | 1.53            | Mrpl15        |
| 1425281_a_at       | 5.37           | 7.45E-06 | 0.00035 | 10.94             | 1.34            | Tsc22d3       |
| 1429556_at         | 5.37           | 7.46E-06 | 0.00035 | 10.48             | 1.38            | 2610024B07Rik |
| 1448636_at         | 5.36           | 7.58E-06 | 0.00035 | 4.35              | 1.56            | Myoz1         |
| 1449876_at         | 5.36           | 7.68E-06 | 0.00035 | 6.10              | 1.43            | Prkg1         |
| 1452929_at         | 5.36           | 7.73E-06 | 0.00036 | 9.85              | 1.11            | Clip1         |
| 1420494_x_at       | 5.35           | 7.81E-06 | 0.00036 | 14.19             | 0.47            | Ubc           |
| 1422375_a_at       | 5.35           | 7.93E-06 | 0.00036 | 4.90              | 1.90            | Art1          |
| 1447109_at         | 5.34           | 8.08E-06 | 0.00037 | 7.10              | 1.63            | Elavl1        |
| 1429215_at         | 5.32           | 8.51E-06 | 0.00038 | 6.82              | 1.47            | 2310058N22Rik |
| 1424177_at         | 5.30           | 9.05E-06 | 0.00040 | 6.03              | 2.36            | Tmem38a       |
| 1435355_at         | 5.30           | 9.06E-06 | 0.00040 | 8.66              | 4.57            | Neb           |
| 1453851_a_at       | 5.29           | 9.25E-06 | 0.00040 | 9.94              | 1.24            | Gadd45g       |
| 1444811_at         | 5.29           | 9.37E-06 | 0.00041 | 5.54              | 1.76            | Tloc1         |
| 1448602_at         | 5.28           | 9.50E-06 | 0.00041 | 7.73              | 3.90            | Pygm          |
| 1420249_s_at       | 5.27           | 9.91E-06 | 0.00042 | 11.51             | 1.01            | Ccl6          |
| 1444376_at         | 5.26           | 1.01E-05 | 0.00043 | 4.23              | 1.47            | Sesn1         |
| 1443100_at         | 5.26           | 1.01E-05 | 0.00043 | 7.44              | 1.74            | Thrb          |
| 1442710_at         | 5.26           | 1.02E-05 | 0.00043 | 9.43              | 1.30            | Pdlim5        |
| 1439431_x_at       | 5.24           | 1.07E-05 | 0.00045 | 4.26              | 1.83            | NA            |
| 1419150_at         | 5.23           | 1.10E-05 | 0.00046 | 4.89              | 2.54            | Myf6          |
| 1435084_at         | 5.23           | 1.12E-05 | 0.00047 | 11.63             | 1.60            | C730049O14Rik |
| 1444341_at         | 5.22           | 1.14E-05 | 0.00047 | 7.55              | 3.83            | 8030451F13Rik |
| 1417626_at         | 5.21           | 1.19E-05 | 0.00049 | 8.77              | 1.95            | Pde4dip       |
| 1421916_at         | 5.21           | 1.19E-05 | 0.00049 | 6.08              | 1.42            | Pdgfra        |
| 1458408_at         | 5.20           | 1.22E-05 | 0.00049 | 6.32              | 1.83            | Samd8         |

| Probe <sup>1</sup> | t <sup>2</sup> | p-value  | q-value | Mean <sup>3</sup> | FC <sup>4</sup> | Symbol        |
|--------------------|----------------|----------|---------|-------------------|-----------------|---------------|
| 1449039_a_at       | 5.20           | 1.22E-05 | 0.00049 | 10.29             | 1.00            | Hnrpd1        |
| 1451204_at         | 5.20           | 1.23E-05 | 0.00049 | 11.71             | 0.93            | Scara5        |
| 1455094_s_at       | 5.19           | 1.25E-05 | 0.00050 | 7.37              | 1.30            | Ube2g1        |
| 1426521_at         | 5.19           | 1.26E-05 | 0.00050 | 9.10              | 1.16            | D230025D16Rik |
| 1455399_at         | 5.18           | 1.27E-05 | 0.00050 | 3.86              | 1.53            | Cnksr1        |
| 1448204_at         | 5.18           | 1.27E-05 | 0.00050 | 10.71             | 1.06            | Sav1          |
| 1441592_at         | 5.18           | 1.28E-05 | 0.00051 | 6.86              | 1.52            | Jmjd1c        |
| 1430969_at         | 5.17           | 1.31E-05 | 0.00051 | 4.67              | 1.38            | Mtch2         |
| 1442618_at         | 5.17           | 1.33E-05 | 0.00052 | 3.46              | 0.82            | Ldhd          |
| 1441112_at         | 5.16           | 1.34E-05 | 0.00052 | 7.56              | 1.46            | LOC667118     |
| 1439153_at         | 5.16           | 1.35E-05 | 0.00052 | 9.93              | 1.24            | Rnf144b       |
| 1449969_at         | 5.16           | 1.35E-05 | 0.00052 | 5.61              | 3.30            | Tmod4         |
| 1442535_at         | 5.16           | 1.36E-05 | 0.00053 | 4.25              | 1.05            | Zfp609        |
| 1443632_at         | 5.16           | 1.37E-05 | 0.00053 | 4.02              | 2.19            | Obscn         |
| 1452096_s_at       | 5.15           | 1.39E-05 | 0.00053 | 7.62              | 1.35            | D230025D16Rik |
| 1460003_at         | 5.15           | 1.40E-05 | 0.00054 | 9.45              | 1.02            | AI956758      |
| 1425275_at         | 5.15           | 1.41E-05 | 0.00054 | 5.75              | 2.41            | Asph          |
| 1439786_at         | 5.12           | 1.51E-05 | 0.00057 | 5.12              | 1.42            | Gab2          |
| 1417168_a_at       | 5.12           | 1.52E-05 | 0.00057 | 6.58              | 1.44            | Usp2          |
| 1442014_at         | 5.12           | 1.52E-05 | 0.00057 | 6.01              | 1.54            | Ifrd1         |
| 1423866_at         | 5.12           | 1.53E-05 | 0.00057 | 7.22              | 2.70            | Serpina3k     |
| 1452026_a_at       | 5.12           | 1.54E-05 | 0.00057 | 8.76              | 1.25            | Pla2g12a      |
| 1443188_at         | 5.11           | 1.55E-05 | 0.00057 | 4.55              | 1.35            | Ube2w         |
| 1425559_a_at       | 5.11           | 1.56E-05 | 0.00057 | 10.35             | 1.78            | Acsm3         |
| 1455437_at         | 5.11           | 1.56E-05 | 0.00057 | 10.01             | 0.96            | 9030204A07Rik |
| 1448789_at         | 5.11           | 1.58E-05 | 0.00058 | 9.05              | 1.03            | Aldh1a3       |
| 1453512_at         | 5.10           | 1.59E-05 | 0.00058 | 6.63              | 1.80            | 5830407P18Rik |
| 1415997_at         | 5.10           | 1.59E-05 | 0.00058 | 12.69             | 1.00            | Txnip         |
| 1441546_at         | 5.10           | 1.60E-05 | 0.00058 | 7.05              | 1.26            | LOC624524     |
| 1434766_at         | 5.10           | 1.61E-05 | 0.00058 | 7.23              | 1.50            | NA            |
| 1419518_at         | 5.10           | 1.62E-05 | 0.00058 | 5.11              | 1.85            | Tuba8         |
| 1421290_at         | 5.10           | 1.63E-05 | 0.00058 | 6.50              | 1.74            | Hspb7         |
| 1455091_at         | 5.09           | 1.64E-05 | 0.00059 | 8.98              | 1.01            | 3222402P14Rik |
| 1418093_a_at       | 5.09           | 1.66E-05 | 0.00059 | 5.47              | 1.40            | Egf           |
| 1422573_at         | 5.08           | 1.68E-05 | 0.00059 | 11.07             | 1.22            | Ampd3         |
| 1423437_at         | 5.08           | 1.69E-05 | 0.00059 | 9.04              | 1.63            | Gsta3         |
| 1458676_at         | 5.08           | 1.72E-05 | 0.00060 | 6.20              | 1.56            | Nktr          |
| 1424312_at         | 5.08           | 1.72E-05 | 0.00060 | 5.66              | 1.41            | Adipor1       |
| 1456502_at         | 5.07           | 1.75E-05 | 0.00061 | 5.01              | 1.38            | Dyrk2         |
| 1427556_at         | 5.07           | 1.76E-05 | 0.00061 | 4.60              | 2.45            | Mylk2         |
| 1442226_at         | 5.07           | 1.78E-05 | 0.00061 | 4.11              | 1.18            | Sema3e        |
| 1454524_at         | 5.06           | 1.80E-05 | 0.00062 | 4.66              | 1.19            | 2310075M01Rik |
| 1432686_at         | 5.04           | 1.89E-05 | 0.00064 | 4.25              | 1.04            | 4833406M21Rik |
| 1440396_at         | 5.04           | 1.89E-05 | 0.00064 | 4.76              | 1.39            | Mpp6          |
| 1436948_a_at       | 5.04           | 1.92E-05 | 0.00065 | 8.63              | 1.27            | 6430550H21Rik |
| 1441233_at         | 5.03           | 1.96E-05 | 0.00066 | 8.78              | 1.25            | Srp54a        |
| 1425137_a_at       | 5.03           | 1.98E-05 | 0.00066 | 9.08              | 1.51            | H2-Q10        |
| 1434909_at         | 5.02           | 2.01E-05 | 0.00067 | 5.59              | 2.20            | Rragd         |
| 1443471_at         | 5.02           | 2.02E-05 | 0.00068 | 8.88              | 1.20            | Zbtb20        |
| 1454174_a_at       | 5.02           | 2.03E-05 | 0.00068 | 8.95              | 1.33            | C330007P06Rik |
| 1424489_a_at       | 5.02           | 2.04E-05 | 0.00068 | 9.22              | 1.00            | Trit1         |
| 1436261_at         | 5.00           | 2.13E-05 | 0.00071 | 4.24              | 1.20            | Dysf          |
| 1444037_at         | 5.00           | 2.14E-05 | 0.00071 | 4.83              | 1.24            | Lman1         |

| Probe <sup>1</sup> | t <sup>2</sup> | p-value  | q-value | Mean <sup>3</sup> | FC <sup>4</sup> | Symbol        |
|--------------------|----------------|----------|---------|-------------------|-----------------|---------------|
| 1460426_at         | 5.00           | 2.15E-05 | 0.00071 | 5.63              | 1.86            | Pde4dip       |
| 1444195_at         | 5.00           | 2.15E-05 | 0.00071 | 5.21              | 1.52            | Rmnd5a        |
| 1439643_at         | 4.99           | 2.19E-05 | 0.00072 | 7.29              | 1.77            | Acvr2a        |
| 1421253_at         | 4.99           | 2.22E-05 | 0.00072 | 6.83              | 3.19            | Nrap          |
| 1419040_at         | 4.98           | 2.26E-05 | 0.00073 | 9.55              | 1.39            | Cyp2d22       |
| 1428186_at         | 4.98           | 2.26E-05 | 0.00073 | 8.86              | 1.20            | Kctd6         |
| 1427446_s_at       | 4.98           | 2.27E-05 | 0.00073 | 8.60              | 4.54            | Ttn           |
| 1460202_at         | 4.98           | 2.27E-05 | 0.00073 | 7.32              | 3.87            | Myoz1         |
| 1456260_at         | 4.98           | 2.28E-05 | 0.00073 | 6.91              | 1.45            | Rbbp4         |
| 1447034_at         | 4.98           | 2.30E-05 | 0.00073 | 5.89              | 1.42            | Tnpo1         |
| 1423049_a_at       | 4.98           | 2.30E-05 | 0.00073 | 11.17             | 2.22            | Tpm1          |
| 1449178_at         | 4.98           | 2.31E-05 | 0.00073 | 9.49              | 1.26            | Pdlim3        |
| 1425564_at         | 4.97           | 2.31E-05 | 0.00073 | 3.44              | 0.77            | Rest          |
| 1438798_at         | 4.97           | 2.32E-05 | 0.00073 | 10.03             | 1.22            | 4931406P16Rik |
| 1419486_at         | 4.96           | 2.39E-05 | 0.00075 | 6.48              | 1.52            | Foxc1         |
| 1416780_at         | 4.96           | 2.43E-05 | 0.00076 | 8.76              | 2.33            | Pfkm          |
| 1422570_at         | 4.95           | 2.45E-05 | 0.00076 | 6.19              | 1.46            | Yy1           |
| 1440158_x_at       | 4.95           | 2.45E-05 | 0.00076 | 3.62              | 1.10            | Chchd7        |
| 1450970_at         | 4.95           | 2.46E-05 | 0.00076 | 7.96              | 1.61            | Got1          |
| 1436544_at         | 4.95           | 2.47E-05 | 0.00076 | 8.74              | 1.30            | Atp10d        |
| 1448793_a_at       | 4.95           | 2.49E-05 | 0.00077 | 6.27              | 1.49            | Sdc4          |
| 1429223_a_at       | 4.95           | 2.50E-05 | 0.00077 | 5.22              | 1.92            | Hfe2          |
| 1422813_at         | 4.94           | 2.52E-05 | 0.00077 | 3.46              | 1.27            | Cacng1        |
| 1417373_a_at       | 4.94           | 2.52E-05 | 0.00077 | 10.90             | 1.46            | Tuba4a        |
| 1441506_at         | 4.94           | 2.53E-05 | 0.00077 | 8.54              | 1.51            | Dcn           |
| 1426015_s_at       | 4.94           | 2.54E-05 | 0.00077 | 11.33             | 0.94            | Asph          |
| 1422560_at         | 4.94           | 2.56E-05 | 0.00078 | 5.95              | 1.37            | Rsc1a1        |
| 1452125_at         | 4.94           | 2.58E-05 | 0.00078 | 8.88              | 1.45            | Thrap3        |
| 1435719_at         | 4.93           | 2.59E-05 | 0.00078 | 5.95              | 1.23            | AI448984      |
| 1431385_a_at       | 4.93           | 2.60E-05 | 0.00078 | 6.19              | 2.08            | Mbtps1        |
| 1418603_at         | 4.93           | 2.65E-05 | 0.00079 | 5.03              | 1.26            | Avpr1a        |
| 1457814_at         | 4.93           | 2.65E-05 | 0.00079 | 5.26              | 1.20            | Nsmce2        |
| 1427306_at         | 4.92           | 2.67E-05 | 0.00079 | 6.90              | 3.14            | Ryr1          |
| 1417374_at         | 4.92           | 2.68E-05 | 0.00079 | 9.60              | 1.39            | Tuba4a        |
| 1435943_at         | 4.92           | 2.71E-05 | 0.00080 | 11.62             | 0.87            | Dpep1         |
| 1419039_at         | 4.92           | 2.72E-05 | 0.00080 | 9.22              | 1.56            | Cyp2d22       |
| 1443926_at         | 4.92           | 2.73E-05 | 0.00080 | 8.39              | 1.45            | Meis2         |
| 1448990_a_at       | 4.91           | 2.81E-05 | 0.00082 | 6.87              | 1.39            | Myo1b         |
| 1444691_at         | 4.90           | 2.84E-05 | 0.00082 | 4.66              | 1.25            | Prkd3         |
| 1415949_at         | 4.89           | 2.93E-05 | 0.00084 | 11.14             | 1.25            | Cpe           |
| 1423145_a_at       | 4.89           | 2.98E-05 | 0.00085 | 8.11              | 4.59            | Tcap          |
| 1440373_at         | 4.88           | 3.01E-05 | 0.00086 | 6.15              | 1.47            | Elavl1        |
| 1455102_at         | 4.88           | 3.01E-05 | 0.00086 | 9.23              | 0.98            | Larp4         |
| 1456378_s_at       | 4.88           | 3.02E-05 | 0.00086 | 9.69              | 0.97            | Fbxl20        |
| 1431928_at         | 4.88           | 3.03E-05 | 0.00086 | 3.87              | 1.39            | Ttn           |
| 1419109_at         | 4.87           | 3.07E-05 | 0.00086 | 4.92              | 2.09            | Hrc           |
| 1455736_at         | 4.87           | 3.13E-05 | 0.00087 | 8.30              | 5.12            | Mybpc2        |
| 1439006_x_at       | 4.87           | 3.13E-05 | 0.00087 | 8.29              | 1.20            | 6430550H21Rik |
| 1418062_at         | 4.87           | 3.13E-05 | 0.00087 | 8.01              | 1.99            | Eef1a2        |
| 1416129_at         | 4.87           | 3.15E-05 | 0.00088 | 10.45             | 2.05            | Errfi1        |
| 1416987_at         | 4.86           | 3.18E-05 | 0.00088 | 4.47              | 1.19            | Elp4          |
| 1433575_at         | 4.86           | 3.20E-05 | 0.00089 | 11.54             | 1.21            | NA            |
| 1453775_at         | 4.86           | 3.22E-05 | 0.00089 | 4.19              | 1.22            | 4921505C17Rik |

| Probe <sup>1</sup> | t <sup>2</sup> | p-value  | q-value | Mean <sup>3</sup> | FC <sup>4</sup> | Symbol        |
|--------------------|----------------|----------|---------|-------------------|-----------------|---------------|
| 1434458_at         | 4.86           | 3.23E-05 | 0.00089 | 9.36              | 1.19            | Fst           |
| 1420924_at         | 4.85           | 3.27E-05 | 0.00090 | 8.83              | 1.50            | Timp2         |
| 1455785_at         | 4.85           | 3.30E-05 | 0.00090 | 5.21              | 1.38            | Kcna1         |
| 1420376_a_at       | 4.85           | 3.31E-05 | 0.00090 | 12.18             | 0.81            | H3f3b         |
| 1425645_s_at       | 4.85           | 3.31E-05 | 0.00090 | 5.29              | 3.12            | Cyp2b10       |
| 1437230_at         | 4.85           | 3.33E-05 | 0.00091 | 5.39              | 1.40            | Kcna1         |
| 1434728_at         | 4.85           | 3.34E-05 | 0.00091 | 6.77              | 1.43            | Gria3         |
| 1455214_at         | 4.84           | 3.40E-05 | 0.00092 | 9.87              | 0.97            | Mitf          |
| 1422884_at         | 4.84           | 3.43E-05 | 0.00093 | 9.70              | 0.93            | Snrpd3        |
| 1435008_at         | 4.83           | 3.51E-05 | 0.00095 | 11.11             | 1.29            | Slc9a6        |
| 1456621_at         | 4.83           | 3.53E-05 | 0.00095 | 10.01             | 1.09            | D430015B01Rik |
| 1445559_at         | 4.83           | 3.54E-05 | 0.00095 | 5.79              | 1.39            | rp9           |
| 1456596_at         | 4.82           | 3.55E-05 | 0.00096 | 7.73              | 1.32            | 6430550H21Rik |
| 1447657_s_at       | 4.81           | 3.67E-05 | 0.00098 | 4.15              | 1.74            | Synpo2l       |
| 1437869_at         | 4.81           | 3.70E-05 | 0.00098 | 7.82              | 1.23            | 3222402P14Rik |
| 1445807_at         | 4.80           | 3.77E-05 | 0.00099 | 5.03              | 1.36            | Prkg1         |
| 1437666_x_at       | 4.80           | 3.77E-05 | 0.00099 | 14.17             | 0.47            | Ubc           |
| 1451999_at         | 4.80           | 3.80E-05 | 0.00100 | 4.65              | 1.38            | Ldb3          |
| 1456548_at         | 4.80           | 3.81E-05 | 0.00100 | 4.83              | 1.27            | Mtdh          |
| 1436549_a_at       | 4.80           | 3.84E-05 | 0.00100 | 10.09             | 0.91            | Hnrnpa1       |
| 1430476_at         | 4.80           | 3.86E-05 | 0.00100 | 5.11              | 1.57            | Srp54b        |
| 1422654_at         | 4.79           | 3.89E-05 | 0.00101 | 4.06              | 1.37            | Sgca          |
| 1452651_a_at       | 4.79           | 3.93E-05 | 0.00102 | 12.19             | 1.90            | Myl1          |
| 1424141_at         | 4.79           | 3.94E-05 | 0.00102 | 9.86              | 0.96            | Hectd1        |
| 1435163_at         | 4.78           | 4.02E-05 | 0.00104 | 7.39              | 1.48            | 9030612M13Rik |
| 1443651_at         | 4.78           | 4.02E-05 | 0.00104 | 4.65              | 1.29            | Phc3          |
| 1455680_at         | 4.78           | 4.07E-05 | 0.00104 | 5.77              | 1.24            | 9630025H16Rik |
| 1429094_at         | 4.77           | 4.10E-05 | 0.00105 | 5.30              | 1.35            | Ddi2          |
| 1457147_at         | 4.77           | 4.11E-05 | 0.00105 | 5.56              | 1.40            | Etl4          |
| 1429481_at         | 4.77           | 4.16E-05 | 0.00106 | 3.80              | 1.25            | Nck2          |
| 1443702_at         | 4.77           | 4.18E-05 | 0.00107 | 5.28              | 2.19            | Mtap4         |
| 1456258_at         | 4.77           | 4.19E-05 | 0.00107 | 7.34              | 1.29            | Emx2          |
| 1421321_a_at       | 4.76           | 4.21E-05 | 0.00107 | 10.70             | 1.08            | Net1          |
| 1442769_at         | 4.76           | 4.25E-05 | 0.00108 | 5.39              | 1.98            | 8030451F13Rik |
| 1426236_a_at       | 4.76           | 4.26E-05 | 0.00108 | 13.75             | 0.72            | Glul          |
| 1425461_at         | 4.76           | 4.26E-05 | 0.00108 | 3.92              | 0.90            | Fbxw11        |
| 1429823_at         | 4.76           | 4.32E-05 | 0.00109 | 3.30              | 1.00            | Sgcg          |
| 1451179_a_at       | 4.75           | 4.37E-05 | 0.00109 | 11.97             | 0.86            | Qk            |
| 1420342_at         | 4.75           | 4.39E-05 | 0.00109 | 8.28              | 1.37            | Gdap10        |
| 1420887_a_at       | 4.75           | 4.41E-05 | 0.00110 | 4.36              | 1.19            | Bcl2l1        |
| 1426180_a_at       | 4.74           | 4.46E-05 | 0.00111 | 5.59              | 1.90            | Smr2          |
| 1422257_s_at       | 4.74           | 4.55E-05 | 0.00112 | 4.57              | 2.89            | Cyp2b10       |
| 1458268_s_at       | 4.73           | 4.60E-05 | 0.00113 | 9.50              | 1.09            | Igfbp3        |
| 1423856_at         | 4.73           | 4.61E-05 | 0.00113 | 4.72              | 1.70            | Rpl17         |
| 1458212_at         | 4.73           | 4.62E-05 | 0.00113 | 4.40              | 1.10            | NA            |
| 1459047_x_at       | 4.73           | 4.64E-05 | 0.00114 | 4.10              | 1.12            | NA            |
| 1455645_at         | 4.73           | 4.65E-05 | 0.00114 | 7.89              | 4.24            | 8030451F13Rik |
| 1425099_a_at       | 4.73           | 4.66E-05 | 0.00114 | 7.43              | 1.50            | Arntl         |
| 1457639_at         | 4.73           | 4.67E-05 | 0.00114 | 5.92              | 1.45            | Atp6v1h       |
| 1446490_at         | 4.72           | 4.72E-05 | 0.00115 | 4.20              | 1.17            | Ptbp2         |
| 1443221_at         | 4.72           | 4.75E-05 | 0.00115 | 6.03              | 1.44            | Wt1           |
| 1418677_at         | 4.72           | 4.77E-05 | 0.00115 | 8.98              | 4.58            | Actn3         |
| 1445198_at         | 4.72           | 4.80E-05 | 0.00116 | 5.66              | 1.59            | Utx           |

| Probe <sup>1</sup> | t <sup>2</sup> | p-value  | q-value | Mean <sup>3</sup> | FC <sup>4</sup> | Symbol        |
|--------------------|----------------|----------|---------|-------------------|-----------------|---------------|
| 1442109_at         | 4.72           | 4.81E-05 | 0.00116 | 8.33              | 1.33            | NA            |
| 1449078_at         | 4.71           | 4.86E-05 | 0.00117 | 9.91              | 1.48            | St3gal6       |
| 1416247_at         | 4.71           | 4.88E-05 | 0.00117 | 11.53             | 0.80            | Dctn3         |
| 1449073_at         | 4.71           | 4.89E-05 | 0.00117 | 5.71              | 1.51            | Flnc          |
| 1435874_at         | 4.71           | 4.95E-05 | 0.00118 | 8.79              | 1.19            | Prkab2        |
| 1417190_at         | 4.70           | 5.01E-05 | 0.00119 | 8.96              | 1.05            | Nampt         |
| 1441688_at         | 4.70           | 5.03E-05 | 0.00119 | 5.59              | 1.19            | 6430537I21Rik |
| 1457633_x_at       | 4.70           | 5.03E-05 | 0.00119 | 4.47              | 2.76            | Cox6a2        |
| 1435872_at         | 4.70           | 5.05E-05 | 0.00120 | 8.24              | 1.46            | Pim1          |
| 1432001_at         | 4.69           | 5.20E-05 | 0.00123 | 6.48              | 3.23            | Zmynd17       |
| 1432665_at         | 4.69           | 5.21E-05 | 0.00123 | 3.87              | 0.89            | 2210416J07Rik |
| 1430370_at         | 4.68           | 5.29E-05 | 0.00124 | 5.32              | 1.36            | Eprs          |
| 1444226_at         | 4.68           | 5.29E-05 | 0.00124 | 3.51              | 0.80            | Foxo3a        |
| 1448303_at         | 4.68           | 5.30E-05 | 0.00124 | 7.99              | 1.03            | Gpnmb         |
| 1438906_at         | 4.68           | 5.35E-05 | 0.00125 | 6.38              | 1.51            | NA            |
| 1440272_at         | 4.68           | 5.40E-05 | 0.00126 | 7.80              | 1.08            | Eif2s1        |
| 1438542_at         | 4.68           | 5.42E-05 | 0.00126 | 4.08              | 1.30            | Trp53         |
| 1440222_at         | 4.68           | 5.43E-05 | 0.00126 | 3.92              | 0.95            | NA            |
| 1426191_a_at       | 4.67           | 5.48E-05 | 0.00127 | 4.19              | 1.23            | Bcl2l1        |
| 1458667_at         | 4.67           | 5.56E-05 | 0.00128 | 8.25              | 1.31            | 4930519N13Rik |
| 1425620_at         | 4.67           | 5.59E-05 | 0.00128 | 7.55              | 1.26            | Tgfbr3        |
| 1423222_at         | 4.67           | 5.59E-05 | 0.00128 | 3.69              | 1.46            | Cap2          |
| 1459764_x_at       | 4.66           | 5.61E-05 | 0.00128 | 7.44              | 1.15            | Snx10         |
| 1433598_at         | 4.66           | 5.61E-05 | 0.00128 | 7.37              | 1.44            | Arglu1        |
| 1457146_at         | 4.66           | 5.70E-05 | 0.00129 | 5.51              | 1.49            | Dock4         |
| 1420119_s_at       | 4.65           | 5.81E-05 | 0.00131 | 6.22              | 1.51            | AU020177      |
| 1423086_at         | 4.65           | 5.82E-05 | 0.00131 | 7.90              | 1.22            | Npc1          |
| 1422009_at         | 4.64           | 5.93E-05 | 0.00133 | 3.70              | 0.79            | Atp1b2        |
| 1421907_at         | 4.64           | 5.93E-05 | 0.00133 | 8.12              | 1.72            | Med1          |
| 1441976_at         | 4.64           | 5.96E-05 | 0.00134 | 5.76              | 1.33            | 5430434G16Rik |
| 1448554_s_at       | 4.64           | 5.98E-05 | 0.00134 | 4.25              | 2.25            | Myh7          |
| 1451718_at         | 4.64           | 6.03E-05 | 0.00134 | 8.19              | 1.19            | Plp1          |
| 1456180_at         | 4.64           | 6.03E-05 | 0.00134 | 2.70              | 0.68            | 6330546B05Rik |
| 1436968_x_at       | 4.64           | 6.03E-05 | 0.00134 | 10.03             | 0.91            | Klh124        |
| 1417268_at         | 4.64           | 6.09E-05 | 0.00134 | 9.38              | 1.05            | Cd14          |
| 1442745_x_at       | 4.63           | 6.11E-05 | 0.00134 | 8.97              | 1.46            | NA            |
| 1444612_at         | 4.63           | 6.12E-05 | 0.00134 | 6.50              | 1.33            | 3222402P14Rik |
| 1456216_at         | 4.63           | 6.12E-05 | 0.00134 | 7.66              | 1.53            | NA            |
| 1415965_at         | 4.63           | 6.13E-05 | 0.00134 | 13.26             | 0.91            | Scd1          |
| 1443977_at         | 4.63           | 6.13E-05 | 0.00134 | 6.55              | 1.69            | E130014H10Rik |
| 1444126_at         | 4.63           | 6.14E-05 | 0.00134 | 7.07              | 1.52            | Pja2          |
| 1427445_a_at       | 4.63           | 6.24E-05 | 0.00136 | 10.28             | 4.87            | Ttn           |
| 1453356_at         | 4.63           | 6.26E-05 | 0.00136 | 7.65              | 1.28            | 5730453I16Rik |
| 1436361_at         | 4.62           | 6.33E-05 | 0.00137 | 4.65              | 1.78            | Vgll2         |
| 1426179_a_at       | 4.62           | 6.35E-05 | 0.00137 | 5.64              | 1.40            | Twsg1         |
| 1419829_a_at       | 4.62           | 6.36E-05 | 0.00137 | 9.91              | 1.06            | Gab2          |
| 1453384_at         | 4.62           | 6.41E-05 | 0.00138 | 5.35              | 1.25            | Dennd1b       |
| 1417273_at         | 4.61           | 6.54E-05 | 0.00140 | 13.19             | 1.30            | Pdk4          |
| 1450047_at         | 4.61           | 6.55E-05 | 0.00140 | 4.25              | 1.06            | Hs6st2        |
| 1444498_at         | 4.60           | 6.66E-05 | 0.00142 | 5.16              | 1.50            | Gphn          |
| 1430097_at         | 4.60           | 6.68E-05 | 0.00142 | 8.35              | 1.25            | 8430436C05Rik |
| 1443402_at         | 4.60           | 6.69E-05 | 0.00142 | 5.16              | 1.48            | Phka2         |
| 1435009_at         | 4.60           | 6.70E-05 | 0.00142 | 10.05             | 1.15            | Slc9a6        |

| Probe <sup>1</sup> | t <sup>2</sup> | p-value  | q-value | Mean <sup>3</sup> | FC <sup>4</sup> | Symbol        |
|--------------------|----------------|----------|---------|-------------------|-----------------|---------------|
| 1418990_at         | 4.60           | 6.71E-05 | 0.00142 | 11.75             | 0.92            | Ms4a4d        |
| 1443315_at         | 4.60           | 6.72E-05 | 0.00142 | 4.53              | 1.33            | NA            |
| 1427867_at         | 4.60           | 6.73E-05 | 0.00142 | 7.23              | 2.44            | Myh1          |
| 1459917_at         | 4.60           | 6.74E-05 | 0.00142 | 8.26              | 1.37            | Ggnbp2        |
| 1444638_at         | 4.59           | 6.84E-05 | 0.00143 | 6.53              | 3.93            | Ttn           |
| 1428440_at         | 4.59           | 6.86E-05 | 0.00143 | 8.81              | 1.21            | Slc25a12      |
| 1416085_s_at       | 4.59           | 6.91E-05 | 0.00144 | 11.77             | 0.86            | Zfand5        |
| 1440267_at         | 4.59           | 6.95E-05 | 0.00144 | 5.05              | 1.61            | Pex1          |
| 1416077_at         | 4.59           | 6.96E-05 | 0.00144 | 9.28              | 1.01            | Adm           |
| 1450917_at         | 4.59           | 6.96E-05 | 0.00144 | 6.00              | 2.74            | Myom2         |
| 1455980_a_at       | 4.59           | 6.99E-05 | 0.00145 | 5.91              | 1.43            | Gas2l3        |
| 1429177_x_at       | 4.59           | 7.00E-05 | 0.00145 | 10.02             | 0.99            | Sox17         |
| 1428562_at         | 4.59           | 7.01E-05 | 0.00145 | 10.76             | 0.98            | 2210403K04Rik |
| 1416816_at         | 4.59           | 7.02E-05 | 0.00145 | 11.76             | 0.74            | Nek7          |
| 1457678_at         | 4.59           | 7.03E-05 | 0.00145 | 5.67              | 1.35            | 2310035C23Rik |
| 1426143_at         | 4.58           | 7.06E-05 | 0.00145 | 8.73              | 2.54            | Trdn          |
| 1436001_at         | 4.58           | 7.06E-05 | 0.00145 | 4.72              | 1.14            | 2310028O11Rik |
| 1417561_at         | 4.58           | 7.10E-05 | 0.00146 | 9.51              | 1.09            | Apoc1         |
| 1425792_a_at       | 4.58           | 7.16E-05 | 0.00146 | 3.88              | 1.18            | Rorc          |
| 1455473_at         | 4.58           | 7.20E-05 | 0.00147 | 5.06              | 1.93            | Usp13         |
| 1433733_a_at       | 4.58           | 7.23E-05 | 0.00147 | 9.05              | 1.16            | Cry1          |
| 1457435_x_at       | 4.57           | 7.24E-05 | 0.00147 | 7.75              | 4.36            | Myom2         |
| 1423233_at         | 4.57           | 7.24E-05 | 0.00147 | 11.09             | 1.19            | Cebpd         |
| 1459391_at         | 4.57           | 7.32E-05 | 0.00148 | 4.82              | 1.37            | Abca5         |
| 1449028_at         | 4.57           | 7.34E-05 | 0.00148 | 7.26              | 1.38            | Rhou          |
| 1419924_at         | 4.57           | 7.36E-05 | 0.00148 | 6.78              | 1.44            | Fnip1         |
| 1434033_at         | 4.57           | 7.38E-05 | 0.00148 | 6.81              | 1.29            | Tle1          |
| 1455047_at         | 4.57           | 7.44E-05 | 0.00149 | 8.93              | 0.88            | Fbxo3         |
| 1427537_at         | 4.56           | 7.46E-05 | 0.00150 | 6.38              | 1.60            | Eppk1         |
| 1460126_at         | 4.56           | 7.49E-05 | 0.00150 | 5.91              | 1.36            | NA            |
| 1450351_a_at       | 4.56           | 7.50E-05 | 0.00150 | 7.56              | 1.24            | Clip1         |
| 1418043_at         | 4.56           | 7.57E-05 | 0.00151 | 4.52              | 1.10            | Abcc5         |
| 1460099_at         | 4.56           | 7.59E-05 | 0.00151 | 3.59              | 0.98            | Atp9b         |
| 1436531_at         | 4.56           | 7.63E-05 | 0.00152 | 8.76              | 1.05            | Metap2        |
| 1438131_at         | 4.55           | 7.70E-05 | 0.00153 | 8.12              | 1.37            | Fbxw2         |
| 1458087_at         | 4.55           | 7.71E-05 | 0.00153 | 3.48              | 1.53            | Stac3         |
| 1418697_at         | 4.55           | 7.76E-05 | 0.00154 | 12.91             | 1.07            | Inmt          |
| 1419312_at         | 4.55           | 7.77E-05 | 0.00154 | 9.71              | 5.18            | Atp2a1        |
| 1451557_at         | 4.55           | 7.82E-05 | 0.00154 | 3.45              | 1.03            | Tat           |
| 1423858_a_at       | 4.55           | 7.83E-05 | 0.00154 | 10.05             | 1.31            | Hmgcs2        |
| 1419145_at         | 4.55           | 7.87E-05 | 0.00155 | 3.58              | 1.36            | Smtnl1        |
| 1436120_at         | 4.54           | 7.89E-05 | 0.00155 | 6.18              | 1.39            | Setdb2        |
| 1427932_s_at       | 4.54           | 7.90E-05 | 0.00155 | 13.87             | 0.61            | 1200016E24Rik |
| 1441315_s_at       | 4.54           | 8.00E-05 | 0.00157 | 7.21              | 1.37            | Slc19a2       |
| 1418755_at         | 4.54           | 8.00E-05 | 0.00157 | 4.05              | 1.08            | Tbx15         |
| 1448079_at         | 4.54           | 8.03E-05 | 0.00157 | 5.61              | 1.10            | Rnf166        |
| 1453413_at         | 4.53           | 8.24E-05 | 0.00160 | 4.64              | 0.96            | Gnas          |
| 1427388_at         | 4.53           | 8.29E-05 | 0.00161 | 4.21              | 1.58            | Lrrc2         |
| 1439042_at         | 4.53           | 8.32E-05 | 0.00161 | 4.11              | 1.05            | Adcyap1r1     |
| 1431043_at         | 4.52           | 8.41E-05 | 0.00163 | 3.88              | 1.31            | Kbtbd5        |
| 1419674_a_at       | 4.52           | 8.52E-05 | 0.00164 | 10.50             | 0.91            | Dpep1         |
| 1429144_at         | 4.51           | 8.61E-05 | 0.00165 | 9.93              | 0.97            | Prei4         |
| 1440536_at         | 4.51           | 8.61E-05 | 0.00165 | 5.05              | 1.33            | Slc22a5       |



| Probe <sup>1</sup> | t <sup>2</sup> | p-value  | q-value | Mean <sup>3</sup> | FC <sup>4</sup> | Symbol        |
|--------------------|----------------|----------|---------|-------------------|-----------------|---------------|
| 1460417_at         | 4.51           | 8.64E-05 | 0.00165 | 5.23              | 1.57            | AB041803      |
| 1448265_x_at       | 4.51           | 8.67E-05 | 0.00165 | 8.85              | 1.49            | Mpzl2         |
| 1449577_x_at       | 4.51           | 8.68E-05 | 0.00165 | 9.36              | 3.45            | Tpm2          |
| 1440123_at         | 4.51           | 8.77E-05 | 0.00167 | 5.47              | 1.27            | NA            |
| 1426731_at         | 4.51           | 8.81E-05 | 0.00167 | 7.35              | 1.75            | Des           |
| 1430646_at         | 4.50           | 8.90E-05 | 0.00168 | 4.71              | 1.14            | 5830407P18Rik |
| 1415994_at         | 4.50           | 8.93E-05 | 0.00169 | 14.66             | 0.45            | Cyp2e1        |
| 1421657_a_at       | 4.50           | 8.97E-05 | 0.00169 | 4.92              | 1.39            | Sox17         |
| 1429410_at         | 4.50           | 9.01E-05 | 0.00169 | 6.39              | 1.29            | Eny2          |
| 1431218_at         | 4.50           | 9.01E-05 | 0.00169 | 6.79              | 1.41            | Zdhhc20       |
| 1419705_at         | 4.49           | 9.16E-05 | 0.00171 | 10.37             | 1.01            | Car5b         |
| 1453840_at         | 4.48           | 9.40E-05 | 0.00175 | 7.29              | 1.32            | Pabpc1        |
| 1446713_at         | 4.48           | 9.45E-05 | 0.00176 | 5.76              | 1.28            | Tial1         |
| 1453447_at         | 4.48           | 9.51E-05 | 0.00177 | 3.50              | 0.66            | 1700109H08Rik |
| 1422743_at         | 4.47           | 9.69E-05 | 0.00179 | 7.73              | 1.67            | Phka1         |
| 1425861_x_at       | 4.47           | 9.70E-05 | 0.00179 | 3.77              | 0.87            | Cacna2d1      |
| 1418066_at         | 4.467539857    | 9.82E-05 | 0.00180 | 9.99              | 0.83            | Cfl2          |
| 1422571_at         | 4.47           | 9.87E-05 | 0.00180 | 11.43             | 1.05            | Thbs2         |
| 1427425_at         | 4.46           | 0.00010  | 0.00183 | 7.56              | 1.60            | 9130208E07Rik |
| 1453374_at         | 4.45           | 0.00010  | 0.00184 | 3.73              | 0.77            | Zfand5        |
| 1436867_at         | 4.45           | 0.00010  | 0.00184 | 6.93              | 2.69            | Srl           |
| 1460241_a_at       | 4.45           | 0.00010  | 0.00184 | 5.43              | 1.24            | St3gal5       |
| 1459434_at         | 4.45           | 0.00010  | 0.00184 | 4.78              | 1.17            | Pdhx          |
| 1421267_a_at       | 4.45           | 0.00010  | 0.00185 | 7.99              | 1.05            | Cited2        |
| 1427026_at         | 4.45           | 0.00010  | 0.00185 | 9.93              | 5.44            | Myh4          |
| 1427038_at         | 4.45           | 0.00010  | 0.00187 | 9.61              | 1.05            | Penk1         |
| 1459392_at         | 4.45           | 0.00010  | 0.00187 | 4.35              | 1.07            | Phf8          |
| 1416236_a_at       | 4.45           | 0.00010  | 0.00187 | 9.12              | 1.36            | Mpzl2         |
| 1447852_x_at       | 4.44           | 0.00010  | 0.00187 | 9.24              | 1.19            | Rilpl1        |
| 1436202_at         | 4.44           | 0.00010  | 0.00187 | 10.22             | 1.13            | NA            |
| 1449547_at         | 4.44           | 0.00011  | 0.00188 | 4.30              | 1.76            | Asb14         |
| 1418412_at         | 4.44           | 0.00011  | 0.00188 | 4.64              | 1.06            | Tpd52l1       |
| 1440511_at         | 4.44           | 0.00011  | 0.00188 | 7.95              | 1.16            | NA            |
| 1446860_at         | 4.44           | 0.00011  | 0.00189 | 7.97              | 1.36            | Gab2          |
| 1453482_at         | 4.44           | 0.00011  | 0.00190 | 4.04              | 0.92            | Cflar         |
| 1445847_at         | 4.43           | 0.00011  | 0.00192 | 3.64              | 1.04            | NA            |
| 1415996_at         | 4.42           | 0.00011  | 0.00195 | 14.29             | 0.42            | Txnip         |
| 1460020_at         | 4.42           | 0.00011  | 0.00196 | 4.60              | 1.00            | Ankrd11       |
| 1418769_at         | 4.42           | 0.00011  | 0.00196 | 5.82              | 2.89            | Myoz2         |
| 1440346_at         | 4.42           | 0.00011  | 0.00196 | 6.25              | 1.43            | Jmjd3         |
| 1459695_at         | 4.42           | 0.00011  | 0.00196 | 7.05              | 1.37            | NA            |
| 1449996_a_at       | 4.42           | 0.00011  | 0.00197 | 7.75              | 2.43            | Tpm3          |
| 1458924_at         | 4.42           | 0.00011  | 0.00197 | 4.08              | 1.03            | D430013B06Rik |
| 1437877_at         | 4.41           | 0.00011  | 0.00199 | 5.94              | 1.37            | Ttc14         |
| 1440806_x_at       | 4.41           | 0.00012  | 0.00202 | 6.21              | 1.38            | 5730526G10Rik |
| 1456862_at         | 4.41           | 0.00012  | 0.00202 | 7.47              | 1.49            | Six4          |
| 1418250_at         | 4.40           | 0.00012  | 0.00203 | 7.25              | 1.17            | Arl4d         |
| 1430020_x_at       | 4.40           | 0.00012  | 0.00203 | 9.59              | 0.84            | Hnrnpa1       |
| 1457454_at         | 4.40           | 0.00012  | 0.00203 | 6.22              | 1.48            | D7Ertd602e    |
| 1438175_x_at       | 4.40           | 0.00012  | 0.00203 | 5.98              | 3.44            | Myom2         |
| 1438609_x_at       | 4.40           | 0.00012  | 0.00204 | 10.03             | 3.67            | Tnni2         |
| 1435265_at         | 4.40           | 0.00012  | 0.00204 | 8.61              | 1.14            | NA            |
| 1446156_at         | 4.40           | 0.00012  | 0.00204 | 5.66              | 1.47            | Dmd           |

| Probe <sup>1</sup> | t <sup>2</sup> | p-value | q-value | Mean <sup>3</sup> | FC <sup>4</sup> | Symbol        |
|--------------------|----------------|---------|---------|-------------------|-----------------|---------------|
| 1422643_at         | 4.40           | 0.00012 | 0.00205 | 3.72              | 0.80            | Moxd1         |
| 1440850_at         | 4.40           | 0.00012 | 0.00206 | 5.39              | 1.31            | Rnf12         |
| 1440347_at         | 4.39           | 0.00012 | 0.00206 | 5.31              | 1.19            | Arhgap10      |
| 1454137_s_at       | 4.39           | 0.00012 | 0.00206 | 4.73              | 1.75            | Hfe2          |
| 1423799_at         | 4.39           | 0.00012 | 0.00206 | 12.29             | 0.69            | Eif1          |
| 1444875_at         | 4.39           | 0.00012 | 0.00209 | 4.17              | 0.95            | Ppp2ca        |
| 1425202_a_at       | 4.39           | 0.00012 | 0.00209 | 3.30              | 0.91            | Ank3          |
| 1451080_at         | 4.38           | 0.00012 | 0.00210 | 9.93              | 0.79            | Usp1          |
| 1423062_at         | 4.38           | 0.00012 | 0.00210 | 11.03             | 1.04            | Igfbp3        |
| 1443218_at         | 4.38           | 0.00013 | 0.00214 | 4.29              | 1.04            | NA            |
| 1450511_at         | 4.38           | 0.00013 | 0.00214 | 3.32              | 0.68            | Musk          |
| 1436322_a_at       | 4.37           | 0.00013 | 0.00215 | 10.24             | 0.94            | 2810001A02Rik |
| 1439399_a_at       | 4.37           | 0.00013 | 0.00217 | 11.02             | 0.92            | Snhg1         |
| 1443003_at         | 4.37           | 0.00013 | 0.00218 | 3.13              | 0.68            | NA            |
| 1436431_at         | 4.36           | 0.00013 | 0.00220 | 4.90              | 1.08            | 1700025G04Rik |
| 1450118_a_at       | 4.36           | 0.00013 | 0.00222 | 9.29              | 5.19            | Tnnt3         |
| 1428682_at         | 4.36           | 0.00013 | 0.00222 | 8.16              | 1.00            | Zc3h6         |
| 1434778_at         | 4.36           | 0.00013 | 0.00222 | 9.93              | 0.78            | Wapal         |
| 1454018_at         | 4.35           | 0.00014 | 0.00226 | 6.51              | 1.27            | Tlk2          |
| 1422793_at         | 4.35           | 0.00014 | 0.00227 | 9.12              | 0.91            | Pafah1b2      |
| 1431664_at         | 4.35           | 0.00014 | 0.00227 | 3.25              | 0.61            | Luc7l         |
| 1459713_s_at       | 4.35           | 0.00014 | 0.00228 | 8.56              | 1.04            | Tmem16a       |
| 1438862_at         | 4.35           | 0.00014 | 0.00228 | 4.60              | 1.27            | A630005I04Rik |
| 1441467_at         | 4.35           | 0.00014 | 0.00228 | 5.58              | 1.27            | Tspan5        |
| 1434758_at         | 4.35           | 0.00014 | 0.00228 | 8.78              | 0.96            | Crispld2      |
| 1433593_at         | 4.35           | 0.00014 | 0.00228 | 10.77             | 0.83            | Ypel5         |
| 1443518_at         | 4.35           | 0.00014 | 0.00228 | 4.45              | 1.17            | Sgce          |
| 1433643_at         | 4.35           | 0.00014 | 0.00228 | 7.04              | 1.33            | Cacna2d1      |
| 1441111_at         | 4.34           | 0.00014 | 0.00230 | 5.01              | 2.10            | NA            |
| 1425022_at         | 4.34           | 0.00014 | 0.00230 | 8.73              | 1.15            | Usp3          |
| 1420487_at         | 4.34           | 0.00014 | 0.00230 | 7.86              | 1.01            | Nol7          |
| 1455078_at         | 4.34           | 0.00014 | 0.00232 | 9.58              | 0.80            | Hsp90aa1      |
| 1416832_at         | 4.33           | 0.00014 | 0.00233 | 10.71             | 1.34            | Slc39a8       |
| 1416612_at         | 4.33           | 0.00014 | 0.00234 | 8.77              | 1.07            | Cyp1b1        |
| 1422996_at         | 4.33           | 0.00014 | 0.00234 | 5.19              | 1.19            | Acot2         |
| 1447094_at         | 4.33           | 0.00015 | 0.00234 | 4.10              | 1.06            | NA            |
| 1437385_at         | 4.33           | 0.00015 | 0.00234 | 7.98              | 0.99            | Ccbe1         |
| 1423851_a_at       | 4.33           | 0.00015 | 0.00235 | 5.73              | 1.37            | Tmem46        |
| 1420551_at         | 4.32           | 0.00015 | 0.00237 | 5.46              | 2.10            | 2310039E09Rik |
| 1442867_at         | 4.32           | 0.00015 | 0.00237 | 3.96              | 0.99            | NA            |
| 1418210_at         | 4.32           | 0.00015 | 0.00238 | 9.28              | 0.86            | Pfn2          |
| 1417653_at         | 4.32           | 0.00015 | 0.00238 | 8.66              | 4.80            | Pvalb         |
| 1444247_at         | 4.32           | 0.00015 | 0.00238 | 3.25              | 0.69            | C81557        |
| 1423470_at         | 4.32           | 0.00015 | 0.00238 | 9.88              | 0.89            | Ptbp2         |
| 1429657_at         | 4.32           | 0.00015 | 0.00239 | 4.35              | 1.19            | Zfand5        |
| 1416467_at         | 4.31           | 0.00016 | 0.00246 | 10.63             | 0.81            | Ddx3x         |
| 1417067_s_at       | 4.31           | 0.00016 | 0.00246 | 7.21              | 1.47            | Cabc1         |
| 1451382_at         | 4.30           | 0.00016 | 0.00247 | 7.46              | 1.97            | Chac1         |
| 1437274_at         | 4.30           | 0.00016 | 0.00247 | 7.36              | 1.24            | Copa          |
| 1444845_at         | 4.30           | 0.00016 | 0.00247 | 6.25              | 1.28            | Scfd1         |
| 1453224_at         | 4.30           | 0.00016 | 0.00247 | 3.69              | 0.83            | Zfand5        |
| 1448553_at         | 4.30           | 0.00016 | 0.00247 | 6.34              | 3.36            | Myh7          |
| 1417066_at         | 4.30           | 0.00016 | 0.00248 | 8.80              | 1.29            | Cabc1         |

| Probe <sup>1</sup>    | t <sup>2</sup> | p-value | q-value | Mean <sup>3</sup> | FC <sup>4</sup> | Symbol        |
|-----------------------|----------------|---------|---------|-------------------|-----------------|---------------|
| 1437556_at            | 4.30           | 0.00016 | 0.00248 | 7.57              | 1.20            | Zfhx4         |
| 1440163_at            | 4.30           | 0.00016 | 0.00248 | 5.59              | 1.18            | Ccnk          |
| 1451805_at            | 4.30           | 0.00016 | 0.00250 | 4.31              | 0.93            | Phip          |
| 1440463_at            | 4.29           | 0.00016 | 0.00251 | 4.98              | 1.34            | Ngly1         |
| 1432646_a_at          | 4.29           | 0.00016 | 0.00251 | 7.26              | 1.63            | 2900097C17Rik |
| 1421365_at            | 4.29           | 0.00016 | 0.00252 | 7.64              | 1.12            | Fst           |
| 1437429_at            | 4.29           | 0.00016 | 0.00252 | 4.41              | 1.01            | Adamtsl1      |
| 1418155_at            | 4.29           | 0.00016 | 0.00255 | 8.94              | 4.49            | Myot          |
| 1438701_at            | 4.28           | 0.00017 | 0.00256 | 6.84              | 1.24            | Bicd1         |
| 1455725_a_at          | 4.28           | 0.00017 | 0.00256 | 12.35             | 0.72            | H3f3b         |
| 1433674_a_at          | 4.28           | 0.00017 | 0.00257 | 10.19             | 0.87            | Snord22       |
| 1415988_at            | 4.28           | 0.00017 | 0.00257 | 9.21              | 1.11            | Hdlbp         |
| 1418095_at            | 4.28           | 0.00017 | 0.00259 | 7.80              | 4.14            | Smpx          |
| 1436462_at            | 4.27           | 0.00017 | 0.00265 | 7.49              | 1.07            | LOC626832     |
| 1442358_at            | 4.27           | 0.00017 | 0.00265 | 4.30              | 1.20            | AA409587      |
| 1426144_x_at          | 4.27           | 0.00017 | 0.00265 | 8.89              | 2.67            | Trdn          |
| 1422736_at            | 4.27           | 0.00017 | 0.00265 | 9.72              | 0.87            | Ranbp9        |
| 1450231_a_at          | 4.27           | 0.00017 | 0.00265 | 3.81              | 0.81            | Xiap          |
| 1439847_s_at          | 4.26           | 0.00018 | 0.00268 | 5.15              | 1.17            | Klf12         |
| 1416551_at            | 4.26           | 0.00018 | 0.00268 | 10.43             | 0.95            | Atp2a2        |
| 1449027_at            | 4.26           | 0.00018 | 0.00268 | 8.71              | 1.19            | Rhou          |
| 1429385_at            | 4.26           | 0.00018 | 0.00270 | 3.81              | 0.78            | Wdr68         |
| 1443618_at            | 4.25           | 0.00018 | 0.00270 | 5.50              | 1.56            | Pdzd2         |
| 1442414_at            | 4.25           | 0.00018 | 0.00270 | 3.67              | 0.97            | Rnf103        |
| 1448371_at            | 4.25           | 0.00018 | 0.00271 | 9.83              | 4.50            | Mylpf         |
| 1452308_a_at          | 4.25           | 0.00018 | 0.00271 | 12.13             | 0.68            | Atp1a2        |
| 1423436_at            | 4.25           | 0.00018 | 0.00271 | 11.81             | 1.07            | Gsta3         |
| 1459877_x_at          | 4.25           | 0.00018 | 0.00272 | 7.04              | 1.32            | Rnf185        |
| 1416889_at            | 4.24           | 0.00019 | 0.00276 | 9.67              | 5.05            | Tnni2         |
| 1417614_at            | 4.24           | 0.00019 | 0.00276 | 9.40              | 4.94            | Ckm           |
| 1438871_at            | 4.24           | 0.00019 | 0.00277 | 7.03              | 1.58            | Son           |
| 1438739_at            | 4.24           | 0.00019 | 0.00277 | 8.60              | 1.12            | Cnbp          |
| 1430295_at            | 4.24           | 0.00019 | 0.00277 | 7.19              | 1.06            | Gna13         |
| 1451740_at            | 4.24           | 0.00019 | 0.00277 | 7.66              | 1.16            | Paip1         |
| 1446146_at            | 4.24           | 0.00019 | 0.00278 | 6.55              | 1.46            | Gjc1          |
| 1429914_at            | 4.24           | 0.00019 | 0.00279 | 5.19              | 1.16            | Epc1          |
| 1443196_at            | 4.23           | 0.00019 | 0.00279 | 5.29              | 1.24            | NA            |
| 1442191_at            | 4.23           | 0.00019 | 0.00280 | 4.55              | 1.22            | 5033411D12Rik |
| 1457825_x_at          | 4.23           | 0.00019 | 0.00281 | 11.31             | 0.81            | Tcn2          |
| 1417341_a_at          | 4.23           | 0.00019 | 0.00282 | 10.13             | 0.85            | Ppp1r2        |
| 1422087_at            | 4.23           | 0.00019 | 0.00282 | 3.41              | 0.74            | Mycl1         |
| 1417520_at            | 4.23           | 0.00019 | 0.00283 | 5.58              | 1.23            | Nfe2l3        |
| 1426464_at            | 4.23           | 0.00019 | 0.00283 | 6.51              | 1.33            | Nr1d1         |
| 1456156_at            | 4.23           | 0.00019 | 0.00283 | 7.25              | 1.29            | Lepr          |
| -PyrucarbMur/L09192_M | 4.22           | 0.00020 | 0.00284 | 10.33             | 0.97            | Pcx           |
| 1460318_at            | 4.22           | 0.00020 | 0.00284 | 6.89              | 3.03            | Csrp3         |
| 1425292_at            | 4.22           | 0.00020 | 0.00284 | 4.71              | 1.10            | Dtna          |
| 1428884_at            | 4.22           | 0.00020 | 0.00285 | 8.82              | 0.89            | Tmem57        |
| 1438675_at            | 4.22           | 0.00020 | 0.00286 | 7.94              | 1.19            | Sfrs8         |
| 1436469_at            | 4.22           | 0.00020 | 0.00286 | 4.28              | 1.10            | LOC634327     |
| 1415893_at            | 4.22           | 0.00020 | 0.00286 | 7.64              | 1.54            | Sgpl1         |
| 1442603_at            | 4.22           | 0.00020 | 0.00286 | 5.47              | 1.27            | Pbrm1         |
| 1446772_at            | 4.22           | 0.00020 | 0.00287 | 4.82              | 1.20            | Sema5a        |

| Probe <sup>1</sup> | t <sup>2</sup> | p-value | q-value | Mean <sup>3</sup> | FC <sup>4</sup> | Symbol        |
|--------------------|----------------|---------|---------|-------------------|-----------------|---------------|
| 1458371_at         | 4.21           | 0.00020 | 0.00288 | 4.42              | 0.89            | 1110051M20Rik |
| 1438972_x_at       | 4.21           | 0.00020 | 0.00288 | 7.94              | 1.54            | LOC100042332  |
| 1449270_at         | 4.21           | 0.00020 | 0.00288 | 7.10              | 1.03            | Plxdc2        |
| 1424251_a_at       | 4.21           | 0.00020 | 0.00291 | 12.45             | 0.74            | Hnrpd1        |
| 1417951_at         | 4.21           | 0.00020 | 0.00292 | 9.65              | 3.07            | Eno3          |
| 1435280_at         | 4.21           | 0.00020 | 0.00292 | 9.44              | 1.03            | AI452195      |
| 1439215_at         | 4.20           | 0.00021 | 0.00294 | 6.16              | 1.27            | Atp2c1        |
| 1434553_at         | 4.20           | 0.00021 | 0.00295 | 6.53              | 1.86            | Tmem56        |
| 1428071_at         | 4.20           | 0.00021 | 0.00295 | 9.05              | 1.07            | 1110038D17Rik |
| 1415712_at         | 4.20           | 0.00021 | 0.00295 | 8.66              | 1.01            | Zranb1        |
| 1425988_a_at       | 4.20           | 0.00021 | 0.00296 | 4.47              | 1.10            | Hipk1         |
| 1454617_at         | 4.20           | 0.00021 | 0.00300 | 11.32             | 0.98            | Arrdc3        |
| 1438398_at         | 4.19           | 0.00021 | 0.00303 | 8.14              | 1.03            | Rbm39         |
| 1430418_at         | 4.18           | 0.00022 | 0.00307 | 7.29              | 1.27            | Tmem57        |
| 1434722_at         | 4.18           | 0.00022 | 0.00308 | 5.77              | 2.75            | Ampd1         |
| 1419606_a_at       | 4.18           | 0.00022 | 0.00308 | 6.02              | 2.89            | Tnnt1         |
| 1445032_at         | 4.18           | 0.00022 | 0.00308 | 3.85              | 0.72            | Dapk1         |
| 1452207_at         | 4.18           | 0.00022 | 0.00308 | 10.91             | 0.80            | Cited2        |
| 1436993_x_at       | 4.18           | 0.00022 | 0.00309 | 8.13              | 0.99            | Pfn2          |
| 1443517_at         | 4.18           | 0.00022 | 0.00309 | 4.68              | 1.18            | 6030443O07Rik |
| 1418486_at         | 4.18           | 0.00022 | 0.00309 | 11.42             | 1.69            | Vnn1          |
| 1439342_at         | 4.18           | 0.00022 | 0.00310 | 8.52              | 1.07            | Clpx          |
| 1459301_at         | 4.18           | 0.00022 | 0.00310 | 5.91              | 1.23            | Meis2         |
| 1417150_at         | 4.18           | 0.00022 | 0.00310 | 4.04              | 1.01            | Slc6a4        |
| 1421239_at         | 4.17           | 0.00022 | 0.00311 | 8.51              | 1.19            | Il6st         |
| 1417902_at         | 4.17           | 0.00022 | 0.00311 | 7.55              | 1.12            | Slc19a2       |
| 1422788_at         | 4.17           | 0.00022 | 0.00311 | 10.96             | 0.83            | Slc43a3       |
| 1444175_at         | 4.17           | 0.00023 | 0.00312 | 4.76              | 1.12            | Arfgef1       |
| 1441620_at         | 4.17           | 0.00023 | 0.00312 | 4.85              | 1.26            | NA            |
| 1429810_at         | 4.17           | 0.00023 | 0.00313 | 5.61              | 1.31            | 4921505C17Rik |
| 1435658_at         | 4.17           | 0.00023 | 0.00315 | 11.08             | 0.94            | Slc27a1       |
| 1439732_at         | 4.16           | 0.00023 | 0.00318 | 3.95              | 0.94            | NA            |
| 1435137_s_at       | 4.16           | 0.00023 | 0.00318 | 13.82             | 0.64            | 1200016E24Rik |
| 1422795_at         | 4.15           | 0.00024 | 0.00324 | 5.59              | 1.09            | Cul3          |
| 1421103_at         | 4.15           | 0.00024 | 0.00325 | 7.91              | 1.39            | Bmp2k         |
| 1435881_at         | 4.15           | 0.00024 | 0.00326 | 7.85              | 1.01            | Map3k12       |
| 1422553_at         | 4.15           | 0.00024 | 0.00327 | 12.03             | 0.69            | Pten          |
| 1433675_at         | 4.15           | 0.00024 | 0.00327 | 9.78              | 0.86            | Snord22       |
| 1458089_at         | 4.15           | 0.00024 | 0.00328 | 5.81              | 1.76            | Fkbp5         |
| 1448607_at         | 4.15           | 0.00024 | 0.00328 | 6.92              | 1.19            | Nampt         |
| 1415801_at         | 4.14           | 0.00024 | 0.00329 | 7.42              | 1.18            | Gja1          |
| 1437177_at         | 4.14           | 0.00024 | 0.00329 | 8.47              | 0.97            | Larp4         |
| 1446244_at         | 4.14           | 0.00025 | 0.00330 | 6.02              | 1.14            | Zyg11b        |
| 1440431_at         | 4.14           | 0.00025 | 0.00331 | 6.50              | 1.19            | Meis1         |
| 1431166_at         | 4.14           | 0.00025 | 0.00331 | 5.02              | 1.18            | Chd1          |
| 1452496_at         | 4.14           | 0.00025 | 0.00334 | 6.96              | 1.09            | Atp11c        |
| 1425153_at         | 4.13           | 0.00025 | 0.00335 | 9.12              | 4.38            | Myh2          |
| 1422644_at         | 4.13           | 0.00025 | 0.00337 | 6.67              | 1.75            | Sh3bgr        |
| 1426155_a_at       | 4.13           | 0.00025 | 0.00337 | 4.08              | 1.08            | Osr2          |
| 1447839_x_at       | 4.13           | 0.00025 | 0.00337 | 8.63              | 1.12            | Adm           |
| 1460281_at         | 4.13           | 0.00025 | 0.00338 | 3.07              | 0.70            | Asb15         |
| 1422518_at         | 4.13           | 0.00026 | 0.00338 | 8.38              | 1.03            | Cask          |
| 1449348_at         | 4.13           | 0.00026 | 0.00338 | 9.41              | 0.84            | Mpp6          |

| Probe <sup>1</sup> | t <sup>2</sup> | p-value | q-value | Mean <sup>3</sup> | FC <sup>4</sup> | Symbol        |
|--------------------|----------------|---------|---------|-------------------|-----------------|---------------|
| 1442880_at         | 4.13           | 0.00026 | 0.00339 | 3.97              | 0.98            | NA            |
| 1434203_at         | 4.12           | 0.00026 | 0.00340 | 4.49              | 0.90            | BC055107      |
| 1422025_at         | 4.12           | 0.00026 | 0.00340 | 5.05              | 1.29            | Mitf          |
| 1434362_at         | 4.12           | 0.00026 | 0.00340 | 6.20              | 1.25            | NA            |
| 1434405_at         | 4.12           | 0.00026 | 0.00343 | 8.68              | 0.99            | Fnip1         |
| 1435458_at         | 4.12           | 0.00026 | 0.00343 | 8.04              | 1.06            | Pim1          |
| 1441519_at         | 4.12           | 0.00026 | 0.00343 | 6.47              | 1.40            | Nid1          |
| 1438201_at         | 4.12           | 0.00026 | 0.00345 | 8.53              | 0.98            | Ppm2c         |
| 1459647_at         | 4.12           | 0.00026 | 0.00345 | 3.93              | 0.88            | Pold3         |
| 1429251_at         | 4.11           | 0.00027 | 0.00347 | 7.58              | 1.04            | Prdm2         |
| 1419739_at         | 4.11           | 0.00027 | 0.00349 | 5.79              | 2.01            | Tpm2          |
| 1446340_at         | 4.11           | 0.00027 | 0.00349 | 3.73              | 0.80            | Ar            |
| 1417642_at         | 4.11           | 0.00027 | 0.00350 | 5.46              | 1.10            | Aldh1a3       |
| 1430575_a_at       | 4.11           | 0.00027 | 0.00350 | 7.96              | 1.07            | Tpp2          |
| 1443847_x_at       | 4.11           | 0.00027 | 0.00350 | 8.35              | 1.17            | Aff2          |
| 1447800_x_at       | 4.11           | 0.00027 | 0.00351 | 11.70             | 0.74            | Tcn2          |
| 1444128_at         | 4.10           | 0.00027 | 0.00351 | 5.77              | 1.39            | Arhgap26      |
| 1440490_at         | 4.10           | 0.00028 | 0.00353 | 5.72              | 1.20            | Mpp6          |
| 1436908_at         | 4.10           | 0.00028 | 0.00353 | 8.82              | 0.82            | Pcm1          |
| 1440225_at         | 4.10           | 0.00028 | 0.00357 | 9.45              | 0.92            | Gpr116        |
| 1438075_at         | 4.10           | 0.00028 | 0.00357 | 6.55              | 1.32            | Fem1c         |
| 1444695_at         | 4.10           | 0.00028 | 0.00357 | 5.68              | 1.17            | NA            |
| 1436108_at         | 4.09           | 0.00028 | 0.00357 | 3.79              | 0.96            | Txndc9        |
| 1417607_at         | 4.09           | 0.00028 | 0.00359 | 7.56              | 3.32            | Cox6a2        |
| 1427540_at         | 4.09           | 0.00028 | 0.00359 | 6.08              | 1.26            | Zwint         |
| 1436994_a_at       | 4.09           | 0.00028 | 0.00360 | 12.91             | 0.68            | Hist1h1c      |
| 1430147_a_at       | 4.09           | 0.00028 | 0.00360 | 8.37              | 1.05            | Josd3         |
| 1436964_at         | 4.09           | 0.00029 | 0.00361 | 6.76              | 1.18            | D7Ertd715e    |
| 1454919_at         | 4.09           | 0.00029 | 0.00361 | 9.56              | 0.80            | NA            |
| 1455506_at         | 4.08           | 0.00029 | 0.00368 | 5.36              | 1.35            | Slc25a34      |
| 1428546_at         | 4.08           | 0.00029 | 0.00369 | 9.91              | 0.73            | Syncrip       |
| 1416752_at         | 4.08           | 0.00030 | 0.00372 | 7.65              | 3.48            | Ldb3          |
| 1428373_at         | 4.07           | 0.00030 | 0.00376 | 6.10              | 1.24            | Ihpk2         |
| 1447845_s_at       | 4.07           | 0.00030 | 0.00376 | 10.27             | 1.88            | Vnn1          |
| 1435344_at         | 4.07           | 0.00030 | 0.00377 | 8.07              | 0.99            | 1110029I05Rik |
| 1440854_at         | 4.07           | 0.00030 | 0.00377 | 6.11              | 1.40            | 2810403A07Rik |
| 1418069_at         | 4.07           | 0.00030 | 0.00377 | 6.66              | 1.15            | Apoc2         |
| 1425711_a_at       | 4.07           | 0.00030 | 0.00377 | 7.52              | 1.28            | Akt1          |
| 1456081_a_at       | 4.06           | 0.00031 | 0.00383 | 7.26              | 1.22            | Aacs          |
| 1438719_at         | 4.06           | 0.00031 | 0.00383 | 8.73              | 1.04            | Map3k2        |
| 1449573_at         | 4.06           | 0.00031 | 0.00383 | 3.92              | 1.13            | Alpk3         |
| 1446700_at         | 4.06           | 0.00031 | 0.00383 | 5.83              | 1.28            | NA            |
| 1452707_at         | 4.06           | 0.00031 | 0.00384 | 4.36              | 1.92            | Klhl30        |
| 1419088_at         | 4.06           | 0.00031 | 0.00385 | 8.03              | 1.00            | Timp3         |
| 1421987_at         | 4.05           | 0.00031 | 0.00385 | 7.69              | 1.35            | Papss2        |
| 1439216_at         | 4.05           | 0.00031 | 0.00385 | 4.32              | 0.97            | BB211804      |
| 1459882_at         | 4.05           | 0.00031 | 0.00385 | 4.79              | 0.98            | Mcm9          |
| 1449079_s_at       | 4.05           | 0.00031 | 0.00385 | 10.06             | 1.29            | St3gal6       |
| 1429337_at         | 4.05           | 0.00031 | 0.00385 | 8.86              | 0.83            | Tmem87b       |
| 1448029_at         | 4.05           | 0.00032 | 0.00386 | 6.95              | 1.64            | Tbx3          |
| 1453255_at         | 4.05           | 0.00032 | 0.00387 | 7.40              | 1.39            | Slc43a1       |
| 1439722_at         | 4.05           | 0.00032 | 0.00388 | 8.69              | 1.00            | NA            |
| 1448889_at         | 4.05           | 0.00032 | 0.00389 | 3.29              | 0.79            | Slc38a4       |

| Probe <sup>1</sup> | t <sup>2</sup> | p-value | q-value | Mean <sup>3</sup> | FC <sup>4</sup> | Symbol        |
|--------------------|----------------|---------|---------|-------------------|-----------------|---------------|
| 1442715_at         | 4.04           | 0.00033 | 0.00396 | 4.77              | 1.50            | NA            |
| 1426142_a_at       | 4.04           | 0.00033 | 0.00397 | 9.02              | 2.13            | Trdn          |
| 1447360_at         | 4.04           | 0.00033 | 0.00399 | 4.34              | 0.87            | Tsc22d1       |
| 1435267_at         | 4.04           | 0.00033 | 0.00399 | 9.04              | 0.97            | A430108E01Rik |
| 1427893_a_at       | 4.03           | 0.00033 | 0.00402 | 8.44              | 1.11            | Pmvk          |
| 1446150_at         | 4.03           | 0.00033 | 0.00403 | 3.80              | 0.80            | NA            |
| 1419156_at         | 4.03           | 0.00034 | 0.00409 | 7.22              | 1.58            | Sox4          |
| 1455305_x_at       | 4.02           | 0.00034 | 0.00411 | 10.63             | 0.71            | Hnrnpa1       |
| 1442761_at         | 4.02           | 0.00034 | 0.00414 | 7.03              | 1.23            | Tpd52l2       |
| 1453128_at         | 4.02           | 0.00034 | 0.00414 | 8.84              | 1.00            | Lyve1         |
| 1436145_at         | 4.02           | 0.00035 | 0.00414 | 6.38              | 1.07            | Igf2bp3       |
| 1447842_x_at       | 4.02           | 0.00035 | 0.00415 | 11.14             | 0.83            | Tcn2          |
| 1442846_at         | 4.02           | 0.00035 | 0.00415 | 5.80              | 1.28            | Pbx1          |
| 1446921_at         | 4.02           | 0.00035 | 0.00418 | 6.22              | 1.21            | NA            |
| 1422470_at         | 4.01           | 0.00035 | 0.00420 | 13.67             | 0.50            | Bnip3         |
| 1425457_a_at       | 4.01           | 0.00036 | 0.00423 | 5.55              | 1.22            | Grb10         |
| 1457367_at         | 4.01           | 0.00036 | 0.00424 | 6.75              | 1.20            | Amy2          |
| 1442381_at         | 4.01           | 0.00036 | 0.00424 | 6.00              | 1.28            | Mkln1         |
| 1453925_at         | 4.01           | 0.00036 | 0.00425 | 2.93              | 0.58            | 4930429F24Rik |
| 1421184_a_at       | 4.01           | 0.00036 | 0.00426 | 10.62             | 0.89            | Mettl7a1      |
| 1417464_at         | 4.00           | 0.00036 | 0.00426 | 10.78             | 4.87            | Tnnc2         |
| 1445781_at         | 4.00           | 0.00036 | 0.00427 | 5.49              | 1.04            | Sh3d19        |
| 1455610_at         | 4.00           | 0.00036 | 0.00428 | 6.60              | 1.45            | Dmn           |
| 1442529_at         | 4.00           | 0.00037 | 0.00432 | 3.27              | 0.72            | Ogfrl1        |
| 1445571_at         | 4.00           | 0.00037 | 0.00432 | 5.28              | 1.05            | Tbk1          |
| 1451601_a_at       | 4.00           | 0.00037 | 0.00432 | 7.58              | 1.10            | Spns2         |
| 1450703_at         | 4.00           | 0.00037 | 0.00432 | 3.83              | 0.81            | Slc7a2        |
| 1456521_at         | 4.00           | 0.00037 | 0.00432 | 3.36              | 1.50            | NA            |
| 1442168_at         | 3.99           | 0.00037 | 0.00435 | 4.34              | 0.90            | A230071A22Rik |
| 1428776_at         | 3.99           | 0.00037 | 0.00435 | 8.21              | 0.93            | Slc10a6       |
| 1458203_at         | 3.99           | 0.00037 | 0.00435 | 4.87              | 0.99            | Spire1        |
| 1446626_at         | 3.99           | 0.00037 | 0.00436 | 4.38              | 0.83            | D16H22S680E   |
| 1449350_at         | 3.99           | 0.00038 | 0.00438 | 8.41              | 0.97            | Osr1          |
| 1423796_at         | 3.99           | 0.00038 | 0.00440 | 8.13              | 1.04            | Sfpq          |
| 1447812_x_at       | 3.98           | 0.00038 | 0.00441 | 4.10              | 1.04            | Flnc          |
| 1450368_a_at       | 3.98           | 0.00038 | 0.00441 | 7.27              | 1.16            | Ppp3r1        |
| 1427868_x_at       | 3.98           | 0.00038 | 0.00441 | 10.26             | 4.99            | Myh1          |
| 1433656_a_at       | 3.98           | 0.00038 | 0.00442 | 10.64             | 0.69            | Gnl3          |
| 1457689_at         | 3.98           | 0.00039 | 0.00443 | 6.80              | 1.51            | Sbf2          |
| 1423522_at         | 3.98           | 0.00039 | 0.00443 | 5.47              | 0.99            | Npm3          |
| 1438127_at         | 3.98           | 0.00039 | 0.00443 | 5.53              | 1.05            | LOC552906     |
| 1460455_at         | 3.98           | 0.00039 | 0.00444 | 10.93             | 0.76            | Zfp650        |
| 1423172_at         | 3.98           | 0.00039 | 0.00445 | 4.35              | 1.04            | Napb          |
| 1454646_at         | 3.98           | 0.00039 | 0.00445 | 10.09             | 0.72            | Tcp11l2       |
| 1453059_at         | 3.98           | 0.00039 | 0.00446 | 4.88              | 1.61            | 2310046A06Rik |
| 1455136_at         | 3.97           | 0.00039 | 0.00448 | 8.78              | 0.86            | Atp1a2        |
| 1428444_at         | 3.97           | 0.00039 | 0.00448 | 6.37              | 2.03            | Asb2          |
| 1453344_at         | 3.97           | 0.00039 | 0.00448 | 4.97              | 1.09            | 1810032O08Rik |
| 1444507_at         | 3.97           | 0.00039 | 0.00449 | 4.44              | 1.01            | Usp53         |
| 1454043_a_at       | 3.96           | 0.00040 | 0.00456 | 4.21              | 0.84            | Kcnab1        |
| 1416067_at         | 3.96           | 0.00040 | 0.00456 | 11.74             | 0.84            | Ifrd1         |
| 1430529_at         | 3.96           | 0.00040 | 0.00456 | 5.03              | 1.04            | Csnk1a1       |
| 1456153_at         | 3.96           | 0.00040 | 0.00456 | 8.19              | 0.91            | Ssh2          |

| Probe <sup>1</sup> | t <sup>2</sup> | p-value | q-value | Mean <sup>3</sup> | FC <sup>4</sup> | Symbol        |
|--------------------|----------------|---------|---------|-------------------|-----------------|---------------|
| 1439036_a_at       | 3.96           | 0.00041 | 0.00458 | 9.43              | 0.80            | Atp1b1        |
| 1421078_at         | 3.96           | 0.00041 | 0.00460 | 5.60              | 1.22            | Tcf23         |
| 1445575_at         | 3.96           | 0.00041 | 0.00461 | 2.91              | 0.54            | Fbxl20        |
| 1448383_at         | 3.95           | 0.00041 | 0.00465 | 10.65             | 0.67            | Mmp14         |
| 1455320_at         | 3.95           | 0.00042 | 0.00466 | 9.46              | 0.83            | NA            |
| 1438471_at         | 3.95           | 0.00042 | 0.00467 | 7.75              | 1.31            | Wtap          |
| 1444722_at         | 3.95           | 0.00042 | 0.00470 | 4.40              | 1.13            | NA            |
| 1457047_at         | 3.95           | 0.00042 | 0.00471 | 4.91              | 1.10            | NA            |
| 1418858_at         | 3.95           | 0.00042 | 0.00473 | 7.03              | 1.11            | Aox3          |
| 1419155_a_at       | 3.95           | 0.00043 | 0.00475 | 6.28              | 1.29            | Sox4          |
| 1433681_x_at       | 3.94           | 0.00043 | 0.00475 | 4.32              | 1.22            | Capn3         |
| 1449999_a_at       | 3.94           | 0.00043 | 0.00477 | 3.62              | 0.72            | Cacna2d1      |
| 1448167_at         | 3.94           | 0.00043 | 0.00478 | 9.89              | 0.75            | Ifngr1        |
| 1441531_at         | 3.94           | 0.00044 | 0.00484 | 5.69              | 1.09            | Plcb4         |
| 1430205_a_at       | 3.94           | 0.00044 | 0.00484 | 6.41              | 1.13            | Cdc3711       |
| 1448829_at         | 3.94           | 0.00044 | 0.00484 | 8.07              | 0.93            | Smc6          |
| 1417872_at         | 3.93           | 0.00044 | 0.00487 | 12.16             | 0.73            | Fhl1          |
| 1425701_a_at       | 3.93           | 0.00044 | 0.00489 | 8.23              | 1.61            | Rgs3          |
| 1424007_at         | 3.93           | 0.00045 | 0.00491 | 9.57              | 0.81            | Gdf10         |
| 1438900_at         | 3.93           | 0.00045 | 0.00494 | 5.97              | 1.23            | Sacm1l        |
| 1429863_at         | 3.92           | 0.00045 | 0.00495 | 4.50              | 1.17            | Lonrf3        |
| 1442424_at         | 3.92           | 0.00045 | 0.00497 | 8.10              | 1.04            | Ctdspl2       |
| 1433177_at         | 3.92           | 0.00045 | 0.00497 | 3.28              | 0.76            | 4933427C19Rik |
| 1436893_a_at       | 3.92           | 0.00045 | 0.00498 | 9.21              | 0.77            | Mar-07        |
| 1456855_at         | 3.92           | 0.00045 | 0.00498 | 4.66              | 1.11            | NA            |
| 1457233_at         | 3.92           | 0.00046 | 0.00498 | 8.44              | 0.99            | Dnaja2        |
| 1443962_at         | 3.92           | 0.00046 | 0.00498 | 6.94              | 0.99            | Tfdp2         |
| 1427520_a_at       | 3.92           | 0.00046 | 0.00500 | 10.21             | 4.85            | Myh1          |
| 1423072_at         | 3.92           | 0.00046 | 0.00502 | 7.17              | 1.41            | NA            |
| 1432006_at         | 3.91           | 0.00046 | 0.00506 | 5.53              | 1.12            | Ap2a2         |
| 1437548_at         | 3.91           | 0.00047 | 0.00508 | 5.67              | 1.04            | Bicd1         |
| 1430164_a_at       | 3.91           | 0.00047 | 0.00508 | 7.01              | 1.09            | Grb10         |
| 1434008_at         | 3.91           | 0.00048 | 0.00514 | 3.94              | 1.23            | Scn4b         |
| 1424797_a_at       | 3.90           | 0.00048 | 0.00515 | 3.89              | 1.05            | Pitx2         |
| 1444677_at         | 3.90           | 0.00048 | 0.00515 | 5.67              | 1.18            | C77673        |
| 1423280_at         | 3.90           | 0.00048 | 0.00519 | 5.04              | 0.97            | Stmn2         |
| 1456256_at         | 3.90           | 0.00048 | 0.00521 | 8.99              | 0.84            | Eif5          |
| 1422925_s_at       | 3.90           | 0.00049 | 0.00523 | 4.45              | 1.60            | Acot3         |
| 1438234_at         | 3.90           | 0.00049 | 0.00524 | 8.36              | 0.99            | Wdr26         |
| 1425658_at         | 3.89           | 0.00049 | 0.00526 | 3.97              | 0.84            | Cd109         |
| 1435585_at         | 3.89           | 0.00049 | 0.00526 | 4.24              | 1.27            | Tceal7        |
| 1427358_a_at       | 3.89           | 0.00049 | 0.00526 | 8.46              | 0.90            | Dapk1         |
| 1450006_at         | 3.89           | 0.00050 | 0.00531 | 10.83             | 0.82            | Ncoa4         |
| 1449088_at         | 3.89           | 0.00050 | 0.00534 | 6.20              | 1.94            | Fbp2          |
| 1440488_at         | 3.89           | 0.00050 | 0.00534 | 4.25              | 0.94            | NA            |
| 1450813_a_at       | 3.89           | 0.00050 | 0.00535 | 5.14              | 2.51            | Tnni1         |
| 1439095_at         | 3.88           | 0.00050 | 0.00535 | 6.27              | 1.13            | Sfrs11        |
| 1418872_at         | 3.88           | 0.00050 | 0.00535 | 10.23             | 0.87            | Abcb1b        |
| 1442125_at         | 3.88           | 0.00050 | 0.00535 | 5.32              | 1.25            | Krit1         |
| 1429379_at         | 3.88           | 0.00051 | 0.00535 | 10.70             | 0.88            | Lyve1         |
| 1436092_at         | 3.88           | 0.00051 | 0.00535 | 3.55              | 1.19            | NA            |
| 1448320_at         | 3.88           | 0.00051 | 0.00537 | 8.02              | 1.09            | Stim1         |
| 1420250_at         | 3.88           | 0.00051 | 0.00538 | 6.24              | 1.24            | NA            |

| Probe <sup>1</sup> | t <sup>2</sup> | p-value | q-value | Mean <sup>3</sup> | FC <sup>4</sup> | Symbol        |
|--------------------|----------------|---------|---------|-------------------|-----------------|---------------|
| 1451203_at         | 3.88           | 0.00051 | 0.00538 | 8.81              | 4.17            | Mb            |
| 1458757_at         | 3.88           | 0.00051 | 0.00540 | 3.31              | 0.65            | Ptbp2         |
| 1418323_at         | 3.87           | 0.00052 | 0.00545 | 5.51              | 1.04            | Fem1b         |
| 1441407_at         | 3.87           | 0.00052 | 0.00545 | 7.57              | 1.36            | Rod1          |
| 1441266_at         | 3.87           | 0.00052 | 0.00549 | 8.97              | 0.92            | Strn3         |
| 1455554_at         | 3.87           | 0.00052 | 0.00549 | 3.51              | 0.63            | A830039N20Rik |
| 1426231_at         | 3.87           | 0.00053 | 0.00549 | 8.37              | 0.93            | Vit           |
| 1430271_x_at       | 3.87           | 0.00053 | 0.00550 | 9.07              | 0.85            | Josd3         |
| 1439079_a_at       | 3.87           | 0.00053 | 0.00551 | 7.54              | 1.00            | Erbp2ip       |
| 1437039_at         | 3.87           | 0.00053 | 0.00553 | 9.62              | 0.70            | Cops2         |
| 1421989_s_at       | 3.86           | 0.00053 | 0.00554 | 9.29              | 0.84            | Papss2        |
| 1444982_at         | 3.86           | 0.00053 | 0.00554 | 5.40              | 1.08            | Rhoj          |
| 1457358_at         | 3.86           | 0.00054 | 0.00558 | 5.24              | 1.00            | NA            |
| 1442946_at         | 3.86           | 0.00054 | 0.00558 | 5.81              | 1.08            | Atxn7         |
| 1422744_at         | 3.86           | 0.00054 | 0.00562 | 4.78              | 1.22            | Phka1         |
| 1429537_at         | 3.86           | 0.00054 | 0.00563 | 7.85              | 1.21            | Sfrs18        |
| 1447491_at         | 3.85           | 0.00055 | 0.00566 | 5.14              | 0.98            | Lrrc8d        |
| 1453238_s_at       | 3.85           | 0.00055 | 0.00567 | 13.64             | 0.63            | 1200016E24Rik |
| 1421377_at         | 3.85           | 0.00055 | 0.00569 | 3.42              | 0.71            | Traf6         |
| 1447023_at         | 3.85           | 0.00056 | 0.00573 | 4.17              | 0.78            | NA            |
| 1425514_at         | 3.85           | 0.00056 | 0.00575 | 9.01              | 0.85            | Pik3r1        |
| 1433574_at         | 3.85           | 0.00056 | 0.00575 | 9.14              | 0.77            | Cdc37l1       |
| 1429796_at         | 3.84           | 0.00056 | 0.00575 | 4.46              | 0.82            | Kalrn         |
| 1416144_a_at       | 3.84           | 0.00056 | 0.00575 | 11.80             | 0.63            | Dhx15         |
| 1429318_a_at       | 3.84           | 0.00057 | 0.00585 | 10.67             | 0.68            | Qk            |
| 1450956_at         | 3.84           | 0.00057 | 0.00585 | 3.85              | 1.15            | Scd3          |
| 1441947_x_at       | 3.84           | 0.00058 | 0.00589 | 8.60              | 0.93            | BC033915      |
| 1443375_at         | 3.83           | 0.00059 | 0.00596 | 4.90              | 0.99            | Gnas          |
| 1430407_at         | 3.83           | 0.00059 | 0.00597 | 4.77              | 1.06            | 3110035C09Rik |
| 1439316_at         | 3.83           | 0.00059 | 0.00598 | 7.30              | 1.03            | Rbm39         |
| 1416817_at         | 3.83           | 0.00059 | 0.00599 | 4.13              | 0.77            | Nek7          |
| 1444472_at         | 3.82           | 0.00060 | 0.00603 | 9.81              | 0.92            | Snf1lk2       |
| 1446397_at         | 3.82           | 0.00060 | 0.00606 | 5.05              | 1.05            | Nup98         |
| 1453487_at         | 3.82           | 0.00060 | 0.00607 | 8.40              | 0.85            | Dhdh          |
| 1437071_at         | 3.82           | 0.00061 | 0.00615 | 5.34              | 1.09            | Eif1ay        |
| 1445866_at         | 3.81           | 0.00061 | 0.00615 | 5.64              | 1.13            | Mast4         |
| 1444557_at         | 3.81           | 0.00061 | 0.00616 | 4.30              | 1.00            | Sumo1         |
| 1430404_at         | 3.81           | 0.00061 | 0.00616 | 4.62              | 1.09            | Akap13        |
| 1422754_at         | 3.81           | 0.00061 | 0.00616 | 6.80              | 1.29            | Tmod1         |
| 1424074_at         | 3.81           | 0.00062 | 0.00620 | 6.17              | 0.99            | Btf3l4        |
| 1442435_at         | 3.81           | 0.00062 | 0.00620 | 4.39              | 0.84            | Smg6          |
| 1419754_at         | 3.81           | 0.00062 | 0.00625 | 9.48              | 0.83            | Myo5a         |
| 1418523_at         | 3.80           | 0.00063 | 0.00625 | 5.97              | 1.04            | Arih2         |
| 1441115_at         | 3.80           | 0.00063 | 0.00626 | 8.19              | 1.89            | D18ErtD232e   |
| 1425767_a_at       | 3.80           | 0.00063 | 0.00626 | 4.78              | 0.94            | Six4          |
| 1418694_at         | 3.80           | 0.00064 | 0.00636 | 6.99              | 1.06            | Kcmf1         |
| 1436945_x_at       | 3.80           | 0.00064 | 0.00639 | 6.13              | 1.22            | Stim1         |
| 1427735_a_at       | 3.79           | 0.00064 | 0.00639 | 12.94             | 1.79            | Acta1         |
| 1439293_at         | 3.79           | 0.00065 | 0.00640 | 10.36             | 0.71            | BC031353      |
| 1418209_a_at       | 3.79           | 0.00065 | 0.00640 | 9.74              | 0.76            | Pfn2          |
| 1448845_at         | 3.79           | 0.00065 | 0.00640 | 4.58              | 0.99            | Rpp25         |
| 1416721_s_at       | 3.79           | 0.00065 | 0.00641 | 10.90             | 0.72            | Sfrs6         |
| 1427820_at         | 3.79           | 0.00065 | 0.00642 | 7.91              | 1.52            | NA            |



| Probe <sup>1</sup> | t <sup>2</sup> | p-value | q-value | Mean <sup>3</sup> | FC <sup>4</sup> | Symbol        |
|--------------------|----------------|---------|---------|-------------------|-----------------|---------------|
| 1425464_at         | 3.79           | 0.00065 | 0.00643 | 8.37              | 1.08            | Gata6         |
| 1426395_s_at       | 3.79           | 0.00066 | 0.00647 | 9.91              | 0.67            | Eif3j         |
| 1418370_at         | 3.78           | 0.00066 | 0.00653 | 7.60              | 2.62            | Tnnc1         |
| 1456873_at         | 3.78           | 0.00067 | 0.00654 | 6.94              | 1.05            | Clic5         |
| 1444620_at         | 3.78           | 0.00067 | 0.00658 | 3.99              | 0.75            | Tcf12         |
| 1425001_at         | 3.78           | 0.00067 | 0.00659 | 6.14              | 1.02            | Rnf146        |
| 1442878_at         | 3.78           | 0.00067 | 0.00659 | 4.41              | 1.16            | Prdx6         |
| 1449383_at         | 3.78           | 0.00068 | 0.00659 | 7.04              | 2.12            | Adssl1        |
| 1449640_at         | 3.78           | 0.00068 | 0.00661 | 3.76              | 0.72            | Tlr7          |
| 1428633_at         | 3.78           | 0.00068 | 0.00661 | 5.50              | 0.96            | Twistnb       |
| 1430598_at         | 3.77           | 0.00068 | 0.00662 | 4.40              | 0.87            | Crem          |
| 1447609_at         | 3.77           | 0.00068 | 0.00663 | 3.62              | 0.70            | 5730410E15Rik |
| 1441850_x_at       | 3.77           | 0.00069 | 0.00667 | 7.86              | 1.08            | Tcn2          |
| 1417889_at         | 3.77           | 0.00069 | 0.00670 | 7.79              | 2.82            | Apobec2       |
| 1442834_at         | 3.77           | 0.00069 | 0.00671 | 5.30              | 1.03            | Ppp4r2        |
| 1449901_a_at       | 3.77           | 0.00070 | 0.00672 | 6.61              | 1.11            | Map3k6        |
| 1455351_at         | 3.77           | 0.00070 | 0.00673 | 6.24              | 1.03            | NA            |
| 1443235_at         | 3.77           | 0.00070 | 0.00673 | 3.95              | 0.80            | Eif2ak4       |
| 1423243_at         | 3.76           | 0.00070 | 0.00674 | 4.24              | 1.13            | Mpp1          |
| 1438428_at         | 3.76           | 0.00070 | 0.00675 | 7.59              | 1.30            | Jph1          |
| 1456830_at         | 3.76           | 0.00070 | 0.00675 | 6.82              | 1.05            | Ppp1r2        |
| 1447459_at         | 3.76           | 0.00070 | 0.00675 | 3.73              | 0.91            | Aatf          |
| 1446886_at         | 3.76           | 0.00070 | 0.00676 | 6.60              | 1.27            | Usp3          |
| 1430319_at         | 3.76           | 0.00071 | 0.00676 | 4.81              | 1.08            | 4833411C07Rik |
| 1423615_at         | 3.76           | 0.00071 | 0.00677 | 8.92              | 0.81            | Zfp364        |
| 1441238_at         | 3.76           | 0.00071 | 0.00679 | 6.94              | 1.29            | Pds5a         |
| 1449865_at         | 3.76           | 0.00071 | 0.00681 | 4.18              | 0.89            | Sema3a        |
| 1439800_at         | 3.76           | 0.00072 | 0.00684 | 6.66              | 1.04            | Clip1         |
| 1453028_at         | 3.75           | 0.00072 | 0.00685 | 8.11              | 0.93            | Pwwp2a        |
| 1448325_at         | 3.75           | 0.00072 | 0.00686 | 6.95              | 1.17            | Myd116        |
| 1438516_at         | 3.75           | 0.00072 | 0.00688 | 6.15              | 1.02            | Rif1          |
| 1455546_s_at       | 3.75           | 0.00073 | 0.00689 | 8.83              | 0.76            | Sf3a2         |
| 1439341_at         | 3.75           | 0.00073 | 0.00694 | 4.96              | 1.36            | AK220484      |
| 1442176_at         | 3.75           | 0.00073 | 0.00694 | 3.60              | 0.67            | Arid5b        |
| 1420410_at         | 3.75           | 0.00073 | 0.00695 | 4.37              | 1.43            | Nr5a2         |
| 1435449_at         | 3.75           | 0.00074 | 0.00696 | 4.39              | 0.79            | Bcl2l11       |
| 1429963_at         | 3.75           | 0.00074 | 0.00696 | 4.37              | 1.13            | Mapk6         |
| 1450910_at         | 3.74           | 0.00074 | 0.00698 | 4.93              | 1.27            | Cap2          |
| 1455455_at         | 3.74           | 0.00074 | 0.00702 | 6.18              | 1.03            | Glt28d2       |
| 1444089_at         | 3.74           | 0.00075 | 0.00703 | 8.83              | 1.08            | Spnb2         |
| 1449528_at         | 3.74           | 0.00075 | 0.00703 | 9.20              | 0.72            | Figf          |
| 1443649_at         | 3.74           | 0.00075 | 0.00705 | 7.04              | 1.14            | Huwe1         |
| 1431355_s_at       | 3.74           | 0.00075 | 0.00706 | 7.76              | 1.07            | Trpm7         |
| 1430637_at         | 3.74           | 0.00075 | 0.00706 | 8.07              | 1.02            | 2210016H18Rik |
| 1432827_x_at       | 3.74           | 0.00075 | 0.00707 | 13.72             | 0.47            | Ubc           |
| 1428228_at         | 3.74           | 0.00076 | 0.00710 | 8.64              | 0.90            | Pgm3          |
| 1454802_x_at       | 3.73           | 0.00076 | 0.00711 | 11.08             | 0.71            | Arih2         |
| 1429165_at         | 3.73           | 0.00076 | 0.00713 | 5.74              | 1.01            | 3110001I22Rik |
| 1423043_s_at       | 3.73           | 0.00077 | 0.00716 | 12.89             | 0.54            | Ddx3x         |
| 1436318_at         | 3.73           | 0.00077 | 0.00719 | 8.71              | 0.89            | Tardbp        |
| 1449388_at         | 3.73           | 0.00077 | 0.00719 | 3.92              | 1.01            | Thbs4         |
| 1433192_at         | 3.73           | 0.00077 | 0.00719 | 5.95              | 1.38            | A430105P17Rik |
| 1436769_at         | 3.73           | 0.00078 | 0.00724 | 4.55              | 0.94            | Psma1         |

| Probe <sup>1</sup> | t <sup>2</sup> | p-value | q-value | Mean <sup>3</sup> | FC <sup>4</sup> | Symbol        |
|--------------------|----------------|---------|---------|-------------------|-----------------|---------------|
| 1442406_at         | 3.72           | 0.00078 | 0.00727 | 7.02              | 1.16            | 9230104K21Rik |
| 1416101_a_at       | 3.72           | 0.00078 | 0.00727 | 12.19             | 0.65            | Hist1h1c      |
| 1457930_at         | 3.72           | 0.00078 | 0.00727 | 5.67              | 1.06            | Jarid1c       |
| 1451257_at         | 3.72           | 0.00079 | 0.00728 | 3.26              | 0.66            | Acsl6         |
| 1434515_at         | 3.72           | 0.00079 | 0.00732 | 9.05              | 0.76            | Ncoa1         |
| 1449732_at         | 3.72           | 0.00079 | 0.00733 | 7.85              | 0.91            | Zscan21       |
| 1432198_at         | 3.72           | 0.00080 | 0.00735 | 7.68              | 1.10            | A230083H22Rik |
| 1455479_a_at       | 3.71           | 0.00080 | 0.00740 | 13.09             | 0.58            | Ube2d3        |
| 1430585_at         | 3.71           | 0.00082 | 0.00752 | 8.06              | 1.02            | 5930436O19Rik |
| 1422811_at         | 3.71           | 0.00082 | 0.00754 | 10.42             | 0.89            | Slc27a1       |
| 1428010_at         | 3.70           | 0.00083 | 0.00758 | 5.79              | 1.06            | Timm9         |
| 1437941_at         | 3.70           | 0.00083 | 0.00759 | 3.99              | 0.90            | Phka2         |
| 1444951_at         | 3.70           | 0.00084 | 0.00764 | 4.22              | 0.80            | Dennd1b       |
| 1449816_at         | 3.70           | 0.00084 | 0.00767 | 5.94              | 0.99            | Sult5a1       |
| 1428163_at         | 3.70           | 0.00084 | 0.00770 | 11.79             | 0.66            | Sar1b         |
| 1425296_a_at       | 3.69           | 0.00085 | 0.00772 | 8.42              | 1.40            | Rgs3          |
| 1416060_at         | 3.69           | 0.00085 | 0.00772 | 11.71             | 0.74            | Tbc1d15       |
| 1456706_at         | 3.69           | 0.00085 | 0.00774 | 5.97              | 1.06            | 4833441D16Rik |
| 1427638_at         | 3.69           | 0.00085 | 0.00774 | 6.07              | 1.13            | Zbtb16        |
| 1437508_at         | 3.69           | 0.00085 | 0.00774 | 5.05              | 1.03            | Sp4           |
| 1447849_s_at       | 3.69           | 0.00086 | 0.00778 | 10.55             | 0.68            | Maf           |
| 1431936_a_at       | 3.68           | 0.00087 | 0.00786 | 3.09              | 0.76            | Neu2          |
| 1424280_at         | 3.68           | 0.00087 | 0.00787 | 9.90              | 0.69            | Mospd1        |
| 1422404_x_at       | 3.68           | 0.00087 | 0.00787 | 3.25              | 0.57            | Ifna7         |
| 1439238_at         | 3.68           | 0.00087 | 0.00787 | 3.98              | 0.89            | Unc84b        |
| 1450637_a_at       | 3.68           | 0.00087 | 0.00787 | 11.04             | 0.65            | Aebp1         |
| 1435875_at         | 3.68           | 0.00087 | 0.00788 | 8.15              | 0.88            | Prkab2        |
| 1430345_at         | 3.68           | 0.00088 | 0.00789 | 7.94              | 1.01            | 5530402H23Rik |
| 1443002_at         | 3.68           | 0.00088 | 0.00789 | 5.53              | 0.96            | Zfr           |
| 1425906_a_at       | 3.68           | 0.00088 | 0.00789 | 3.45              | 0.63            | Sema3e        |
| 1422598_at         | 3.68           | 0.00088 | 0.00790 | 6.51              | 2.60            | Casq1         |
| 1442625_at         | 3.68           | 0.00088 | 0.00793 | 5.18              | 1.02            | Fermt2        |
| 1421376_at         | 3.68           | 0.00089 | 0.00795 | 4.03              | 0.82            | Traf6         |
| 1416860_s_at       | 3.68           | 0.00089 | 0.00795 | 9.99              | 0.75            | Ing1          |
| 1457035_at         | 3.68           | 0.00089 | 0.00797 | 10.23             | 0.75            | AI607873      |
| 1420888_at         | 3.68           | 0.00089 | 0.00797 | 7.46              | 1.04            | Bcl2l1        |
| 1453189_at         | 3.67           | 0.00090 | 0.00798 | 4.90              | 1.00            | Ube2i         |
| 1434613_at         | 3.67           | 0.00090 | 0.00798 | 10.70             | 0.64            | 1810013L24Rik |
| 1427233_at         | 3.67           | 0.00090 | 0.00799 | 9.75              | 0.71            | Tshz1         |
| 1443673_x_at       | 3.67           | 0.00090 | 0.00800 | 6.12              | 1.34            | NA            |
| 1427539_a_at       | 3.67           | 0.00090 | 0.00801 | 8.65              | 0.94            | Zwint         |
| 1418090_at         | 3.67           | 0.00091 | 0.00805 | 8.68              | 1.13            | Plvap         |
| 1448200_at         | 3.67           | 0.00091 | 0.00810 | 10.94             | 0.76            | Tcn2          |
| 1430498_at         | 3.67           | 0.00092 | 0.00812 | 4.71              | 0.89            | 9130009I01Rik |
| 1446149_at         | 3.66           | 0.00092 | 0.00815 | 4.49              | 0.95            | Ppp3cb        |
| 1438515_at         | 3.66           | 0.00092 | 0.00815 | 6.64              | 1.21            | Zfp207        |
| 1420940_x_at       | 3.66           | 0.00093 | 0.00824 | 8.25              | 0.99            | Rgs5          |
| 1449525_at         | 3.66           | 0.00094 | 0.00826 | 5.49              | 1.16            | Fmo3          |
| 1437543_at         | 3.65           | 0.00095 | 0.00834 | 6.93              | 1.22            | Fubp1         |
| 1440253_at         | 3.65           | 0.00095 | 0.00836 | 10.44             | 0.67            | Psm11         |
| 1426117_a_at       | 3.65           | 0.00095 | 0.00836 | 3.55              | 0.68            | Slc19a2       |
| 1456790_at         | 3.65           | 0.00095 | 0.00836 | 8.62              | 1.01            | Zfp800        |
| 1457632_s_at       | 3.65           | 0.00095 | 0.00836 | 9.51              | 0.81            | Meis2         |

| Probe <sup>1</sup> | t <sup>2</sup> | p-value | q-value | Mean <sup>3</sup> | FC <sup>4</sup> | Symbol        |
|--------------------|----------------|---------|---------|-------------------|-----------------|---------------|
| 1438714_at         | 3.65           | 0.00096 | 0.00839 | 10.75             | 0.85            | Zfp207        |
| 1441799_at         | 3.65           | 0.00096 | 0.00841 | 7.05              | 1.56            | 6030422H21Rik |
| 1433913_at         | 3.65           | 0.00096 | 0.00841 | 8.81              | 0.77            | C80913        |
| 1459361_at         | 3.65           | 0.00096 | 0.00842 | 4.74              | 0.97            | NA            |
| 1431281_at         | 3.65           | 0.00097 | 0.00844 | 4.11              | 1.24            | Dysfip1       |
| 1447793_x_at       | 3.64           | 0.00097 | 0.00846 | 3.74              | 0.71            | Rbx1          |
| 1429806_at         | 3.64           | 0.00098 | 0.00850 | 4.83              | 0.98            | Eral1         |
| 1438039_at         | 3.64           | 0.00098 | 0.00852 | 7.12              | 1.13            | Hectd1        |
| 1430369_at         | 3.64           | 0.00098 | 0.00852 | 3.84              | 0.72            | Epb4.1        |
| 1450198_at         | 3.64           | 0.00098 | 0.00852 | 3.97              | 0.95            | Dusp13        |
| 1419381_at         | 3.64           | 0.00098 | 0.00852 | 6.79              | 0.97            | Terf2ip       |
| 1455430_at         | 3.64           | 0.00098 | 0.00853 | 8.01              | 0.88            | Prr8          |
| 1456199_x_at       | 3.64           | 0.00098 | 0.00853 | 11.20             | 0.74            | Ranbp9        |
| 1423006_at         | 3.64           | 0.00098 | 0.00853 | 3.58              | 0.62            | Pim1          |
| 1429639_at         | 3.64           | 0.00099 | 0.00853 | 7.62              | 1.21            | Prei4         |
| 1429545_at         | 3.64           | 0.00099 | 0.00855 | 4.44              | 0.99            | Ube2i         |
| 1432643_at         | 3.64           | 0.00099 | 0.00856 | 4.08              | 0.78            | 4933411E06Rik |
| 1422403_at         | 3.64           | 0.00099 | 0.00856 | 3.59              | 0.84            | Ifna7         |
| 1460633_at         | 3.64           | 0.00100 | 0.00857 | 8.42              | 0.78            | Prpf19        |
| 1442126_at         | 3.63           | 0.00100 | 0.00859 | 5.30              | 1.00            | 5830417C01Rik |
| 1423353_at         | 3.63           | 0.00100 | 0.00859 | 3.47              | 0.57            | Crispld1      |
| 1454880_s_at       | 3.63           | 0.00100 | 0.00861 | 7.71              | 0.87            | Bmf           |
| 1426837_at         | 3.63           | 0.00100 | 0.00862 | 6.59              | 1.16            | Metap1        |
| 1448076_at         | 3.63           | 0.00100 | 0.00862 | 4.27              | 0.81            | Ctr9          |
| 1440491_at         | 3.63           | 0.00100 | 0.00862 | 7.20              | 1.28            | Slc1a3        |
| 1427150_at         | 3.63           | 0.00101 | 0.00866 | 8.11              | 0.82            | Mll3          |
| 1451361_a_at       | 3.63           | 0.00102 | 0.00873 | 8.81              | 1.10            | Pnpla7        |
| 1457682_at         | 3.62           | 0.00103 | 0.00877 | 4.71              | 0.80            | 9030420J04Rik |
| 1432356_at         | 3.62           | 0.00103 | 0.00880 | 4.83              | 1.02            | 1700056N10Rik |
| 1443905_at         | 3.62           | 0.00103 | 0.00880 | 4.43              | 0.96            | Sfrs8         |
| 1450449_a_at       | 3.62           | 0.00103 | 0.00882 | 8.34              | 1.01            | Rilpl1        |
| 1441765_at         | 3.62           | 0.00104 | 0.00882 | 6.06              | 1.09            | NA            |
| 1440935_at         | 3.62           | 0.00104 | 0.00887 | 5.70              | 1.04            | Grb10         |
| 1429093_at         | 3.62           | 0.00104 | 0.00887 | 6.68              | 1.04            | Ddi2          |
| 1448382_at         | 3.62           | 0.00105 | 0.00891 | 10.42             | 1.24            | Ehhadh        |
| 1437001_at         | 3.61           | 0.00105 | 0.00892 | 7.64              | 1.02            | Gsk3b         |
| 1430746_at         | 3.61           | 0.00106 | 0.00898 | 3.72              | 0.57            | 1110050P16Rik |
| 1449997_at         | 3.61           | 0.00106 | 0.00898 | 7.41              | 1.89            | Tpm3          |
| 1430942_at         | 3.61           | 0.00106 | 0.00899 | 4.81              | 1.00            | 8430437O03Rik |
| 1460547_a_at       | 3.61           | 0.00106 | 0.00899 | 13.73             | 0.42            | Hnrpk         |
| 1439200_x_at       | 3.61           | 0.00106 | 0.00899 | 9.73              | 0.89            | Erdr1         |
| 1421721_a_at       | 3.61           | 0.00107 | 0.00900 | 4.55              | 0.87            | Arnt          |
| 1426194_x_at       | 3.61           | 0.00107 | 0.00901 | 3.39              | 0.59            | Rev3l         |
| 1423396_at         | 3.61           | 0.00107 | 0.00901 | 10.58             | 0.86            | Agt           |
| 1455089_at         | 3.61           | 0.00107 | 0.00901 | 9.96              | 0.75            | Gng12         |
| 1448239_at         | 3.61           | 0.00107 | 0.00901 | 7.98              | 1.27            | Hmox1         |
| 1459341_at         | 3.61           | 0.00107 | 0.00901 | 3.64              | 0.77            | 8030448K23Rik |
| 1447706_at         | 3.61           | 0.00107 | 0.00902 | 8.49              | 1.15            | NA            |
| 1440322_at         | 3.61           | 0.00107 | 0.00902 | 3.02              | 0.54            | Cugbp2        |
| 1425685_at         | 3.60           | 0.00108 | 0.00905 | 4.05              | 0.69            | 2310005E10Rik |
| 1450790_at         | 3.60           | 0.00109 | 0.00915 | 3.64              | 0.74            | Tg            |
| 1449102_at         | 3.60           | 0.00110 | 0.00918 | 8.63              | 0.79            | Ebf2          |
| 1419376_at         | 3.60           | 0.00110 | 0.00921 | 5.66              | 0.99            | 1110018M03Rik |

| Probe <sup>1</sup> | t <sup>2</sup> | p-value | q-value | Mean <sup>3</sup> | FC <sup>4</sup> | Symbol        |
|--------------------|----------------|---------|---------|-------------------|-----------------|---------------|
| 1447870_x_at       | 3.60           | 0.00111 | 0.00922 | 4.78              | 1.29            | 1110002E22Rik |
| 1440020_at         | 3.60           | 0.00111 | 0.00922 | 7.34              | 1.05            | Rlf           |
| 1421921_at         | 3.60           | 0.00111 | 0.00922 | 5.85              | 1.82            | Serpina3m     |
| 1437479_x_at       | 3.59           | 0.00111 | 0.00923 | 6.85              | 1.24            | Tbx3          |
| 1444045_at         | 3.59           | 0.00111 | 0.00923 | 6.09              | 1.19            | NA            |
| 1428653_x_at       | 3.59           | 0.00111 | 0.00923 | 4.58              | 0.99            | Elavl1        |
| 1436766_at         | 3.59           | 0.00111 | 0.00923 | 12.27             | 0.66            | Luc7l2        |
| 1437244_at         | 3.59           | 0.00111 | 0.00923 | 4.70              | 0.99            | Gas2l3        |
| 1425964_x_at       | 3.59           | 0.00111 | 0.00923 | 10.97             | 0.75            | Hspb1         |
| 1441567_at         | 3.59           | 0.00113 | 0.00935 | 4.66              | 0.86            | Myo9a         |
| 1448780_at         | 3.59           | 0.00113 | 0.00935 | 5.52              | 0.92            | Slc12a2       |
| 1432011_at         | 3.58           | 0.00115 | 0.00950 | 5.80              | 1.08            | 2900052L18Rik |
| 1453583_at         | 3.58           | 0.00116 | 0.00952 | 5.53              | 0.97            | Zzef1         |
| 1458233_at         | 3.58           | 0.00116 | 0.00952 | 4.63              | 0.84            | Fryl          |
| 1449668_s_at       | 3.58           | 0.00116 | 0.00955 | 10.41             | 0.67            | Fnip1         |
| 1425480_at         | 3.58           | 0.00117 | 0.00956 | 7.67              | 1.02            | Cnot6l        |
| 1435800_a_at       | 3.58           | 0.00117 | 0.00958 | 13.54             | 0.51            | Csda          |
| 1441573_at         | 3.57           | 0.00117 | 0.00958 | 4.46              | 0.96            | Scmh1         |
| 1439314_at         | 3.57           | 0.00117 | 0.00959 | 7.65              | 1.20            | Clock         |
| 1429784_at         | 3.57           | 0.00117 | 0.00960 | 8.22              | 0.92            | Mapk1ip1l     |
| 1427278_at         | 3.57           | 0.00118 | 0.00963 | 4.54              | 0.92            | Clip4         |
| 1455794_at         | 3.57           | 0.00119 | 0.00967 | 5.47              | 1.59            | Smtnl2        |
| 1445534_at         | 3.57           | 0.00119 | 0.00968 | 5.88              | 1.14            | Flnb          |
| 1437878_s_at       | 3.57           | 0.00119 | 0.00972 | 9.54              | 0.88            | Ttc14         |
| 1416613_at         | 3.57           | 0.00120 | 0.00972 | 7.88              | 1.02            | Cyp1b1        |
| 1431789_s_at       | 3.57           | 0.00120 | 0.00974 | 9.72              | 0.75            | Tmed5         |
| 1438089_a_at       | 3.57           | 0.00120 | 0.00975 | 9.78              | 0.77            | Bclaf1        |
| 1434424_at         | 3.56           | 0.00121 | 0.00976 | 9.78              | 0.80            | Flvcr1        |
| 1443500_at         | 3.56           | 0.00121 | 0.00978 | 5.92              | 0.96            | Mllt10        |
| 1450876_at         | 3.56           | 0.00122 | 0.00983 | 12.61             | 0.60            | Cfh           |
| 1442019_at         | 3.56           | 0.00122 | 0.00985 | 5.35              | 0.96            | Rcvrn         |
| 1426288_at         | 3.56           | 0.00122 | 0.00987 | 4.71              | 0.87            | Lrp4          |
| 1423192_at         | 3.56           | 0.00123 | 0.00989 | 8.49              | 0.86            | Pspc1         |
| 1454404_at         | 3.56           | 0.00123 | 0.00989 | 3.70              | 0.66            | 2610011E03Rik |
| 1429749_at         | 3.56           | 0.00123 | 0.00990 | 7.21              | 0.91            | 9330180L21Rik |
| 1429776_a_at       | 3.56           | 0.00123 | 0.00990 | 8.79              | 0.81            | Dnajb6        |
| 1428976_at         | 3.56           | 0.00123 | 0.00990 | 7.98              | 1.05            | Tmpo          |
| 1453591_at         | 3.56           | 0.00123 | 0.00990 | 4.49              | 0.99            | 5730437N04Rik |
| 1428731_at         | 3.55           | 0.00124 | 0.00994 | 6.41              | 1.12            | Usp54         |
| 1457249_at         | 3.55           | 0.00125 | 0.00998 | 6.84              | 1.07            | Ubap2l        |
| 1438781_at         | 3.55           | 0.00125 | 0.00998 | 7.88              | 0.92            | Tet2          |
| 1442671_at         | 3.55           | 0.00125 | 0.00998 | 4.49              | 0.87            | Ube2k         |
| 1451506_at         | 3.55           | 0.00125 | 0.01000 | 7.20              | 0.99            | Mef2c         |
| 1444783_at         | 3.55           | 0.00125 | 0.01000 | 3.36              | 0.54            | Abi2          |

**Table S4a. Footnote**

Gene lists were generated using the Cyber-T method, with only genes with a *q*-value < 0.01 presented.

| <b>Probe<sup>1</sup></b> | <b>t<sup>2</sup></b> | <b>p-value</b> | <b>q-value</b> | <b>Mean<sup>3</sup></b> | <b>FC<sup>4</sup></b> | <b>Symbol</b> |
|--------------------------|----------------------|----------------|----------------|-------------------------|-----------------------|---------------|
|--------------------------|----------------------|----------------|----------------|-------------------------|-----------------------|---------------|

<sup>1</sup> *Probe* represents the Affymetrix probe set identifier.

<sup>2</sup> *t* represents the t-statistic output from the Cyber-T method.

<sup>3</sup> *Mean* represents the mean expression signal after normalization.

<sup>4</sup> *FC* represents the log<sub>2</sub> fold change in normalized signals.

---

**Table S4b.** Genes downregulated in white adipose tissue of *S6K<sup>-/-</sup>* mice compared to wild type mice.

| Probe <sup>1</sup> | t <sup>2</sup> | p-value  | q-value  | Mean <sup>3</sup> | FC <sup>4</sup> | Symbol        |
|--------------------|----------------|----------|----------|-------------------|-----------------|---------------|
| 1460705_at         | -13.05         | 3.92E-14 | 3.08E-10 | 8.1               | 3.51            | Rps6kb1       |
| 1422141_s_at       | -9.45          | 1.21E-10 | 2.38E-07 | 8.46              | 2.47            | Csprs         |
| 1418713_at         | -9.16          | 2.47E-10 | 4.32E-07 | 6.26              | 3               | Pcbd1         |
| 1424338_at         | -8.96          | 4.17E-10 | 5.96E-07 | 5.71              | 2.83            | Slc6a13       |
| AFFX-MURINE_b1_at  | -8.36          | 1.93E-09 | 2.33E-06 | 14.17             | 0.98            | NA            |
| 1434130_at         | -8.13          | 3.53E-09 | 3.44E-06 | 8.37              | 3.06            | Lhfp12        |
| 1456812_at         | -8.08          | 4.00E-09 | 3.44E-06 | 9.04              | 2.26            | Abcd2         |
| 1434129_s_at       | -7.87          | 6.97E-09 | 4.56E-06 | 9.15              | 2.55            | Lhfp12        |
| 1435792_at         | -7.7           | 1.10E-08 | 6.41E-06 | 10.3              | 1.89            | Csprs         |
| 1418547_at         | -7.56          | 1.62E-08 | 8.08E-06 | 6.04              | 2.32            | Tfpi2         |
| 1436590_at         | -7.43          | 2.29E-08 | 9.23E-06 | 7.13              | 2.3             | Ppp1r3b       |
| 1422140_at         | -7.22          | 4.08E-08 | 1.39E-05 | 8.17              | 2.01            | Csprs         |
| 1424440_at         | -7.2           | 4.25E-08 | 1.39E-05 | 10.89             | 1.76            | Mrps6         |
| 1451655_at         | -7.2           | 4.26E-08 | 1.39E-05 | 6.93              | 2.08            | Slfn8         |
| 1441096_at         | -7.18          | 4.47E-08 | 1.42E-05 | 10.23             | 1.48            | Tusc5         |
| 1436260_at         | -7.18          | 4.51E-08 | 1.42E-05 | 6.63              | 2.65            | NA            |
| 1426936_at         | -7.16          | 4.79E-08 | 1.45E-05 | 7.38              | 2.45            | LOC215866     |
| 1428468_at         | -7.06          | 6.23E-08 | 1.69E-05 | 10.73             | 1.36            | 3110043021Rik |
| 1443698_at         | -7.05          | 6.44E-08 | 1.72E-05 | 7.89              | 2.65            | Xaf1          |
| 1460416_s_at       | -6.92          | 9.17E-08 | 2.12E-05 | 7.22              | 2.37            | Csprs         |
| 1447585_s_at       | -6.86          | 1.08E-07 | 2.36E-05 | 11.7              | 1.5             | Slc5a3        |
| 1454956_at         | -6.84          | 1.15E-07 | 2.42E-05 | 7.75              | 1.77            | Rps6kb1       |
| 1452319_at         | -6.84          | 1.17E-07 | 2.42E-05 | 4.16              | 1.55            | Zfp82         |
| 1440884_s_at       | -6.78          | 1.38E-07 | 2.68E-05 | 10                | 1.52            | A530047J11Rik |
| 1436473_at         | -6.74          | 1.51E-07 | 2.76E-05 | 3.95              | 1.42            | Zfp248        |
| 1449419_at         | -6.68          | 1.78E-07 | 2.97E-05 | 9.36              | 1.74            | Dock8         |
| 1422678_at         | -6.57          | 2.44E-07 | 3.79E-05 | 9.73              | 2.75            | Dgat2         |
| 1423488_at         | -6.56          | 2.49E-07 | 3.83E-05 | 13.47             | 1.24            | Mmd           |
| 1451888_a_at       | -6.51          | 2.93E-07 | 4.16E-05 | 6.11              | 2.83            | Odz4          |
| 1452646_at         | -6.46          | 3.35E-07 | 4.57E-05 | 11.09             | 1.5             | Trp53inp2     |
| 1441727_s_at       | -6.43          | 3.64E-07 | 4.81E-05 | 7.67              | 1.62            | Zfp467        |
| 1451099_at         | -6.38          | 4.14E-07 | 5.33E-05 | 9.88              | 1.58            | Mbc2          |
| 1416968_a_at       | -6.34          | 4.66E-07 | 5.85E-05 | 9.47              | 1.33            | Hsd3b7        |
| 1438980_x_at       | -6.33          | 4.84E-07 | 5.97E-05 | 5.86              | 2.29            | Pm20d1        |
| 1418652_at         | -6.33          | 4.86E-07 | 5.97E-05 | 9.95              | 1.59            | Cxcl9         |
| 1422677_at         | -6.31          | 5.12E-07 | 6.14E-05 | 9.19              | 2.45            | Dgat2         |
| 1423489_at         | -6.26          | 5.91E-07 | 6.68E-05 | 13.67             | 1.08            | Mmd           |
| 1424130_a_at       | -6.23          | 6.40E-07 | 7.18E-05 | 12.76             | 1               | Ptrf          |
| 1454171_x_at       | -6.22          | 6.55E-07 | 7.24E-05 | 6.16              | 1.73            | 9530053H05Rik |
| 1436294_at         | -6.22          | 6.61E-07 | 7.27E-05 | 8.24              | 1.56            | Ankrd29       |
| 1429571_a_at       | -6.13          | 8.50E-07 | 8.85E-05 | 6.46              | 2.16            | Spaca1        |
| 1448755_at         | -6.12          | 8.74E-07 | 8.91E-05 | 6.87              | 3.07            | Col15a1       |
| 1428001_at         | -6.12          | 8.81E-07 | 8.93E-05 | 5.69              | 2.08            | Tshr          |
| 1438756_at         | -6.1           | 9.21E-07 | 9.16E-05 | 7.34              | 1.98            | Ankrd29       |
| 1436047_at         | -6.07          | 9.96E-07 | 9.66E-05 | 6.94              | 1.72            | Gm672         |
| 1429006_s_at       | -6.06          | 1.02E-06 | 9.71E-05 | 4.31              | 1.41            | 2610110G12Rik |
| 1425216_at         | -6.05          | 1.06E-06 | 9.85E-05 | 6.92              | 2.73            | Ffar2         |
| 1458045_at         | -6             | 1.23E-06 | 0.00011  | 6.08              | 1.96            | Odz4          |
| 1419721_at         | -5.98          | 1.29E-06 | 0.00011  | 4.47              | 1.71            | Gpr109a       |
| 1416930_at         | -5.98          | 1.31E-06 | 0.00011  | 5.71              | 2.28            | Ly6d          |
| 1418197_at         | -5.96          | 1.37E-06 | 0.00012  | 9.55              | 2.98            | Ucp1          |

| Probe <sup>1</sup>   | t <sup>2</sup> | p-value  | q-value | Mean <sup>3</sup> | FC <sup>4</sup> | Symbol        |
|----------------------|----------------|----------|---------|-------------------|-----------------|---------------|
| 1425215_at           | -5.96          | 1.37E-06 | 0.00012 | 8.12              | 1.89            | Ffar2         |
| 1437234_x_at         | -5.95          | 1.43E-06 | 0.00012 | 8.4               | 1.2             | Prmt2         |
| 1418472_at           | -5.92          | 1.54E-06 | 0.00012 | 8.16              | 1.61            | Aspa          |
| 1452834_at           | -5.91          | 1.56E-06 | 0.00012 | 5.96              | 1.81            | 2600010E01Rik |
| 1457354_at           | -5.89          | 1.66E-06 | 0.00013 | 4.22              | 1.44            | Krt222        |
| 1435184_at           | -5.88          | 1.73E-06 | 0.00013 | 12.17             | 2.19            | Npr3          |
| 1436199_at           | -5.88          | 1.75E-06 | 0.00013 | 7.69              | 1.85            | Trim14        |
| 1418497_at           | -5.87          | 1.79E-06 | 0.00014 | 10.79             | 2.03            | Fgf13         |
| 1428004_at           | -5.87          | 1.79E-06 | 0.00014 | 5.68              | 1.67            | 3300001G02Rik |
| 1425228_a_at         | -5.84          | 1.95E-06 | 0.00014 | 8.48              | 1.32            | Dguok         |
| <-18SRNAMur/X00686_l | -5.83          | 1.99E-06 | 0.00015 | 13.23             | 3.25            | NA            |
| 1423294_at           | -5.8           | 2.19E-06 | 0.00015 | 10.43             | 3.88            | Met           |
| 1453262_at           | -5.75          | 2.48E-06 | 0.00017 | 3.74              | 1.13            | 2810032G03Rik |
| 1448024_at           | -5.75          | 2.52E-06 | 0.00017 | 11.19             | 2.13            | Npr3          |
| 1445565_at           | -5.74          | 2.57E-06 | 0.00017 | 5.91              | 1.7             | Hist1h1e      |
| 1422948_s_at         | -5.71          | 2.83E-06 | 0.00019 | 9.03              | 1.44            | Hist1h3a      |
| 1416111_at           | -5.67          | 3.12E-06 | 0.0002  | 8.03              | 1.32            | Cd83          |
| 1450843_a_at         | -5.67          | 3.19E-06 | 0.0002  | 10.99             | 1.17            | Serpinh1      |
| 1434530_at           | -5.66          | 3.27E-06 | 0.0002  | 7.46              | 3.21            | Odz4          |
| 1459850_x_at         | -5.63          | 3.48E-06 | 0.00021 | 5.16              | 2.1             | Glr           |
| 1452312_at           | -5.63          | 3.50E-06 | 0.00021 | 6.12              | 1.37            | 2810002D19Rik |
| 1454714_x_at         | -5.58          | 4.12E-06 | 0.00024 | 11.23             | 1.35            | Phgdh         |
| 1450997_at           | -5.56          | 4.34E-06 | 0.00025 | 9.88              | 1.2             | Stk17b        |
| 1443219_at           | -5.54          | 4.55E-06 | 0.00026 | 9.35              | 1.35            | NA            |
| 1417070_at           | -5.53          | 4.65E-06 | 0.00027 | 10.24             | 1.66            | Cyp4v3        |
| 1419669_at           | -5.53          | 4.72E-06 | 0.00027 | 5.14              | 1.49            | Prtn3         |
| 1418498_at           | -5.53          | 4.73E-06 | 0.00027 | 6.36              | 2.69            | Fgf13         |
| 1435905_at           | -5.52          | 4.83E-06 | 0.00027 | 4.03              | 1.04            | D3Ert300e     |
| 1438448_at           | -5.5           | 5.14E-06 | 0.00028 | 5.77              | 2.35            | Otop1         |
| 1450286_at           | -5.5           | 5.15E-06 | 0.00028 | 9.17              | 2.45            | Npr3          |
| 1449396_at           | -5.5           | 5.16E-06 | 0.00028 | 13.13             | 0.87            | Aoc3          |
| 1428052_a_at         | -5.49          | 5.27E-06 | 0.00028 | 4.64              | 1.32            | Zmym1         |
| 1439069_a_at         | -5.48          | 5.40E-06 | 0.00028 | 9.43              | 1.13            | 4933439C20Rik |
| 1433696_at           | -5.48          | 5.41E-06 | 0.00028 | 9.6               | 1.45            | Hn1l          |
| 1452830_s_at         | -5.48          | 5.43E-06 | 0.00028 | 6.2               | 1.5             | Cad           |
| 1430584_s_at         | -5.46          | 5.71E-06 | 0.00029 | 11.37             | 1.78            | Car3          |
| 1456733_x_at         | -5.46          | 5.75E-06 | 0.00029 | 10.47             | 1.28            | Serpinh1      |
| 1456045_at           | -5.46          | 5.79E-06 | 0.0003  | 5.19              | 1.41            | 1700106N22Rik |
| 1449534_at           | -5.45          | 5.99E-06 | 0.0003  | 10.84             | 1.32            | Sycp3         |
| 1435238_x_at         | -5.43          | 6.34E-06 | 0.00032 | 7.52              | 1.6             | 2310009A05Rik |
| 1452583_s_at         | -5.42          | 6.51E-06 | 0.00032 | 9.19              | 1.29            | Galm          |
| 1436594_at           | -5.4           | 6.74E-06 | 0.00033 | 6.01              | 1.49            | Zfp719        |
| 1420444_at           | -5.4           | 6.79E-06 | 0.00033 | 9.54              | 1.37            | Slc22a3       |
| 1438431_at           | -5.4           | 6.84E-06 | 0.00033 | 12.25             | 1.06            | Abcd2         |
| 1435645_at           | -5.4           | 6.91E-06 | 0.00033 | 10.66             | 1.11            | Mmd           |
| 1428897_at           | -5.39          | 7.10E-06 | 0.00034 | 7.31              | 1.91            | 2610029I01Rik |
| 1456471_x_at         | -5.38          | 7.27E-06 | 0.00034 | 10.24             | 1.35            | Phgdh         |
| 1435700_at           | -5.34          | 8.11E-06 | 0.00037 | 5.78              | 1.77            | Tln2          |
| 1452243_at           | -5.34          | 8.11E-06 | 0.00037 | 3.71              | 1.14            | Kcnj14        |
| 1426606_at           | -5.33          | 8.29E-06 | 0.00038 | 5.49              | 1.95            | Crtac1        |
| 1455792_x_at         | -5.33          | 8.39E-06 | 0.00038 | 10.63             | 1.19            | Ndn           |
| 1416844_at           | -5.32          | 8.49E-06 | 0.00038 | 6.92              | 1.42            | Prmt2         |
| 1415818_at           | -5.31          | 8.80E-06 | 0.00039 | 10.73             | 1.26            | Anxa6         |

| Probe <sup>1</sup> | t <sup>2</sup> | p-value  | q-value | Mean <sup>3</sup> | FC <sup>4</sup> | Symbol             |
|--------------------|----------------|----------|---------|-------------------|-----------------|--------------------|
| 1457266_at         | -5.31          | 8.87E-06 | 0.0004  | 8.18              | 1.4             | NA                 |
| 1417877_at         | -5.31          | 8.89E-06 | 0.0004  | 9.17              | 1.94            | Eepd1              |
| 1441206_at         | -5.3           | 9.10E-06 | 0.0004  | 9.83              | 2.64            | Synpo2             |
| 1419748_at         | -5.3           | 9.11E-06 | 0.0004  | 11.44             | 1.08            | Abcd2              |
| 1436172_at         | -5.29          | 9.25E-06 | 0.0004  | 9                 | 1.11            | Samd9l             |
| 1454604_s_at       | -5.28          | 9.70E-06 | 0.00042 | 10.88             | 1.13            | Tspan12            |
| 1435939_s_at       | -5.28          | 9.71E-06 | 0.00042 | 4.63              | 2.07            | AI987662           |
| 1429135_at         | -5.27          | 9.83E-06 | 0.00042 | 8.48              | 2.25            | 1110059M19Rik      |
| 1415936_at         | -5.27          | 9.85E-06 | 0.00042 | 9.24              | 1.17            | Bcar3              |
| 1448321_at         | -5.27          | 9.91E-06 | 0.00042 | 11.08             | 1.1             | Smoc1              |
| 1436530_at         | -5.27          | 1.00E-05 | 0.00043 | 9.58              | 1.16            | OTTMUSG00000000971 |
| 1422838_at         | -5.25          | 1.05E-05 | 0.00044 | 3.76              | 0.86            | Kcnu1              |
| 1416321_s_at       | -5.25          | 1.05E-05 | 0.00044 | 11.77             | 1.57            | Prep               |
| 1416529_at         | -5.23          | 1.11E-05 | 0.00047 | 11.96             | 1.2             | Emp1               |
| 1418490_at         | -5.23          | 1.12E-05 | 0.00047 | 3.88              | 1.1             | Sdsl               |
| 1436702_at         | -5.2           | 1.19E-05 | 0.00049 | 7.26              | 1.93            | Nat8l              |
| 1452203_at         | -5.2           | 1.21E-05 | 0.00049 | 9.69              | 1.34            | Obfc2a             |
| 1419239_at         | -5.2           | 1.21E-05 | 0.00049 | 5.68              | 1.56            | Zfp54              |
| 1437672_at         | -5.2           | 1.21E-05 | 0.00049 | 8.33              | 1.15            | Irs3               |
| 1426658_x_at       | -5.2           | 1.22E-05 | 0.00049 | 9                 | 1.53            | Phgdh              |
| 1418480_at         | -5.19          | 1.23E-05 | 0.0005  | 4.36              | 1.34            | Ppbb               |
| 1455993_at         | -5.19          | 1.24E-05 | 0.0005  | 6.02              | 2.92            | Odz4               |
| 1435326_at         | -5.18          | 1.28E-05 | 0.00051 | 10.99             | 1.57            | AW112037           |
| 1448501_at         | -5.18          | 1.29E-05 | 0.00051 | 8.49              | 1.54            | Tspan6             |
| 1455025_at         | -5.18          | 1.29E-05 | 0.00051 | 6.93              | 2.34            | Paqr9              |
| 1424226_at         | -5.17          | 1.34E-05 | 0.00052 | 7.46              | 1.39            | 9030617003Rik      |
| 1452936_at         | -5.15          | 1.39E-05 | 0.00054 | 3.38              | 1.03            | Crtac1             |
| 1417071_s_at       | -5.15          | 1.40E-05 | 0.00054 | 11                | 1.37            | Cyp4v3             |
| 1440227_at         | -5.14          | 1.42E-05 | 0.00054 | 8.69              | 1.67            | Slc5a3             |
| 1424131_at         | -5.14          | 1.44E-05 | 0.00055 | 9.64              | 1.39            | Col6a3             |
| 1423771_at         | -5.13          | 1.47E-05 | 0.00056 | 9.55              | 1.58            | Prkcdbp            |
| 1444786_at         | -5.13          | 1.48E-05 | 0.00056 | 4.71              | 1.29            | Nol3               |
| 1426947_x_at       | -5.13          | 1.48E-05 | 0.00056 | 8.65              | 2.16            | Col6a2             |
| 1449002_at         | -5.13          | 1.49E-05 | 0.00056 | 9.55              | 1.19            | Phlda3             |
| 1419091_a_at       | -5.11          | 1.55E-05 | 0.00057 | 12.67             | 1.13            | Anxa2              |
| 1454847_at         | -5.11          | 1.55E-05 | 0.00057 | 6.39              | 1.75            | Lhfp12             |
| 1424319_at         | -5.11          | 1.57E-05 | 0.00057 | 6.17              | 1.34            | Oraov1             |
| 1423911_at         | -5.1           | 1.60E-05 | 0.00058 | 11.8              | 1.07            | Ppp2r5a            |
| 1454900_s_at       | -5.1           | 1.61E-05 | 0.00058 | 12.5              | 0.99            | Mycbp2             |
| 1442917_at         | -5.09          | 1.64E-05 | 0.00059 | 4.17              | 1.16            | LOC100040792       |
| 1426530_a_at       | -5.09          | 1.65E-05 | 0.00059 | 10.6              | 0.98            | Klhl5              |
| 1418261_at         | -5.09          | 1.66E-05 | 0.00059 | 7.95              | 1.58            | Syk                |
| 1436943_at         | -5.08          | 1.69E-05 | 0.00059 | 5.16              | 1.29            | Cyb5d2             |
| 1425927_a_at       | -5.08          | 1.69E-05 | 0.00059 | 8.52              | 1.1             | Atf5               |
| 1425837_a_at       | -5.08          | 1.72E-05 | 0.0006  | 9.37              | 1.03            | Ccrn4l             |
| 1455642_a_at       | -5.08          | 1.72E-05 | 0.0006  | 9.18              | 1.52            | Tspan17            |
| 1434051_s_at       | -5.07          | 1.74E-05 | 0.0006  | 7.59              | 1.86            | Hspa12a            |
| 1458820_at         | -5.07          | 1.75E-05 | 0.00061 | 3.89              | 0.97            | Zfp560             |
| 1455436_at         | -5.07          | 1.76E-05 | 0.00061 | 5.07              | 2.38            | Diras2             |
| 1437621_x_at       | -5.07          | 1.77E-05 | 0.00061 | 11.03             | 1.31            | Phgdh              |
| 1422155_at         | -5.06          | 1.82E-05 | 0.00062 | 6.24              | 1.63            | Hist2h3c2          |
| 1421999_at         | -5.05          | 1.85E-05 | 0.00063 | 9.46              | 1.5             | Tshr               |
| 1451679_at         | -5.05          | 1.86E-05 | 0.00063 | 8.87              | 1.62            | 6530401D17Rik      |



| Probe <sup>1</sup> | t <sup>2</sup> | p-value  | q-value | Mean <sup>3</sup> | FC <sup>4</sup> | Symbol        |
|--------------------|----------------|----------|---------|-------------------|-----------------|---------------|
| 1451362_at         | -5.05          | 1.88E-05 | 0.00064 | 8.38              | 1.24            | Rab7i1        |
| 1449349_at         | -5.04          | 1.92E-05 | 0.00065 | 4.69              | 1.35            | Nudt1         |
| 1416407_at         | -5             | 2.16E-05 | 0.00071 | 10.06             | 0.95            | Pea15a        |
| 1424996_at         | -5             | 2.16E-05 | 0.00071 | 8.76              | 1.07            | Cflar         |
| 1427919_at         | -4.99          | 2.20E-05 | 0.00072 | 7.75              | 2.09            | Srpx2         |
| 1457397_at         | -4.99          | 2.20E-05 | 0.00072 | 4.81              | 1.61            | Klf14         |
| 1436075_at         | -4.98          | 2.26E-05 | 0.00073 | 9.12              | 2.23            | Sfrp5         |
| 1421129_a_at       | -4.98          | 2.27E-05 | 0.00073 | 8.32              | 1.3             | Atp2a3        |
| 1440849_at         | -4.98          | 2.27E-05 | 0.00073 | 7.59              | 1.65            | 6330417G04Rik |
| 1439148_a_at       | -4.98          | 2.30E-05 | 0.00073 | 8.95              | 1.12            | Pfkl          |
| 1415923_at         | -4.97          | 2.31E-05 | 0.00073 | 10.23             | 1.08            | Ndn           |
| 1434520_at         | -4.97          | 2.31E-05 | 0.00073 | 7.9               | 1.62            | Sc5d          |
| 1448682_at         | -4.97          | 2.33E-05 | 0.00073 | 11.21             | 0.87            | Dynll1        |
| 1443906_at         | -4.97          | 2.36E-05 | 0.00074 | 9.32              | 1               | Cd55          |
| 1435382_at         | -4.96          | 2.39E-05 | 0.00075 | 11.24             | 1.05            | Ndn           |
| 1419703_at         | -4.95          | 2.49E-05 | 0.00077 | 8.89              | 1.53            | Col5a3        |
| 1456126_at         | -4.94          | 2.57E-05 | 0.00078 | 8.74              | 1.11            | Malt1         |
| 1448280_at         | -4.94          | 2.58E-05 | 0.00078 | 5.14              | 1.74            | Syp           |
| 1418537_at         | -4.94          | 2.58E-05 | 0.00078 | 5.67              | 1.44            | Isoc2b        |
| 1456319_at         | -4.93          | 2.61E-05 | 0.00079 | 5.29              | 1.99            | EG665081      |
| 1422630_at         | -4.93          | 2.63E-05 | 0.00079 | 7.35              | 1.64            | Rad50         |
| 1460173_at         | -4.93          | 2.64E-05 | 0.00079 | 10.46             | 0.98            | Lasp1         |
| 1418172_at         | -4.93          | 2.65E-05 | 0.00079 | 10.68             | 0.92            | Hebp1         |
| 1445268_at         | -4.92          | 2.67E-05 | 0.00079 | 7.47              | 2.86            | NA            |
| 1452250_a_at       | -4.92          | 2.72E-05 | 0.0008  | 10.86             | 1.4             | Col6a2        |
| 1425567_a_at       | -4.91          | 2.75E-05 | 0.00081 | 12.82             | 0.81            | Anxa5         |
| 1426614_at         | -4.91          | 2.79E-05 | 0.00082 | 9.1               | 0.97            | Prkcbp1       |
| 1435353_a_at       | -4.91          | 2.82E-05 | 0.00082 | 8.32              | 1.27            | Sfi1          |
| 1416992_at         | -4.9           | 2.83E-05 | 0.00082 | 6.31              | 2.1             | Mfng          |
| 1454075_s_at       | -4.9           | 2.83E-05 | 0.00082 | 7.42              | 1.25            | Nudt13        |
| 1417688_at         | -4.9           | 2.83E-05 | 0.00082 | 6.55              | 1.3             | BC004044      |
| 1429111_at         | -4.9           | 2.87E-05 | 0.00083 | 9.06              | 1.37            | Tln2          |
| 1435264_at         | -4.89          | 2.94E-05 | 0.00084 | 10.12             | 1.1             | Emilin2       |
| 1447544_at         | -4.89          | 2.96E-05 | 0.00085 | 5.82              | 1.25            | Mmp28         |
| 1440330_at         | -4.89          | 2.96E-05 | 0.00085 | 4.15              | 1.3             | Hist1h1e      |
| 1452770_at         | -4.88          | 3.04E-05 | 0.00086 | 10.66             | 0.89            | Vkorc1        |
| 1440888_at         | -4.88          | 3.04E-05 | 0.00086 | 8.58              | 1.69            | Oxtr          |
| 1427042_at         | -4.88          | 3.05E-05 | 0.00086 | 6.15              | 1.4             | Mal2          |
| 1425266_a_at       | -4.88          | 3.05E-05 | 0.00086 | 8.5               | 1.03            | Rap1gds1      |
| 1435484_at         | -4.88          | 3.06E-05 | 0.00086 | 11.97             | 1.4             | Slc5a3        |
| 1439265_at         | -4.88          | 3.07E-05 | 0.00086 | 4.14              | 1.14            | Xkr6          |
| 1448891_at         | -4.87          | 3.12E-05 | 0.00087 | 7.28              | 2               | Fcrls         |
| 1435660_at         | -4.86          | 3.23E-05 | 0.00089 | 5.52              | 1.57            | A530032D15Rik |
| 1456264_at         | -4.86          | 3.24E-05 | 0.00089 | 4.75              | 1.13            | Commd7        |
| 1450779_at         | -4.85          | 3.27E-05 | 0.0009  | 3.33              | 0.96            | Fabp7         |
| 1428177_at         | -4.82          | 3.56E-05 | 0.00096 | 10.07             | 0.98            | Trappc6b      |
| 1425826_a_at       | -4.82          | 3.57E-05 | 0.00096 | 11.75             | 0.86            | Sorbs1        |
| 1426002_a_at       | -4.82          | 3.57E-05 | 0.00096 | 3.76              | 0.86            | Cdc7          |
| 1451290_at         | -4.82          | 3.58E-05 | 0.00096 | 9.84              | 0.93            | Map1lc3a      |
| 1429246_a_at       | -4.82          | 3.64E-05 | 0.00097 | 10.57             | 1.13            | Anxa6         |
| 1437449_at         | -4.81          | 3.66E-05 | 0.00097 | 4.78              | 1.29            | Rsad1         |
| 1435426_s_at       | -4.81          | 3.72E-05 | 0.00099 | 5.48              | 1.47            | Pisd          |
| 1433443_a_at       | -4.81          | 3.73E-05 | 0.00099 | 11.6              | 0.85            | Hmgcs1        |

| Probe <sup>1</sup> | t <sup>2</sup> | p-value  | q-value | Mean <sup>3</sup> | FC <sup>4</sup> | Symbol        |
|--------------------|----------------|----------|---------|-------------------|-----------------|---------------|
| 1448569_at         | -4.8           | 3.79E-05 | 0.001   | 8.4               | 1.29            | 2410014A08Rik |
| 1423506_a_at       | -4.8           | 3.84E-05 | 0.001   | 10.93             | 1.79            | Nnat          |
| 1455439_a_at       | -4.8           | 3.85E-05 | 0.001   | 14.34             | 0.57            | Lgals1        |
| 1419515_at         | -4.8           | 3.86E-05 | 0.001   | 4.15              | 1.32            | Fgd2          |
| 1428382_at         | -4.79          | 3.95E-05 | 0.00102 | 8.93              | 1.03            | Smarcc2       |
| 1435237_at         | -4.78          | 4.06E-05 | 0.00104 | 7.69              | 1.39            | 2310009A05Rik |
| 1458412_at         | -4.76          | 4.21E-05 | 0.00107 | 3.81              | 0.9             | Zfp78         |
| 1434500_at         | -4.76          | 4.31E-05 | 0.00109 | 8.6               | 1.04            | Ttyh2         |
| 1420631_a_at       | -4.75          | 4.34E-05 | 0.00109 | 9.72              | 0.98            | Bicap         |
| 1428447_at         | -4.75          | 4.35E-05 | 0.00109 | 7.99              | 1.25            | Tmem14a       |
| 1423045_at         | -4.75          | 4.35E-05 | 0.00109 | 8.76              | 1.03            | Ncbp2         |
| 1418262_at         | -4.75          | 4.37E-05 | 0.00109 | 7.49              | 1.36            | Syk           |
| 1419422_at         | -4.75          | 4.44E-05 | 0.0011  | 3.87              | 1.05            | Pkd2l2        |
| 1425145_at         | -4.74          | 4.52E-05 | 0.00112 | 7.04              | 1.37            | Il1rl1        |
| 1436030_at         | -4.74          | 4.52E-05 | 0.00112 | 10.17             | 1.12            | Cachd1        |
| 1428541_at         | -4.74          | 4.57E-05 | 0.00113 | 6.97              | 1.68            | 3321401G04Rik |
| 1450391_a_at       | -4.73          | 4.67E-05 | 0.00114 | 12.36             | 0.94            | Mgll          |
| 1445882_at         | -4.73          | 4.68E-05 | 0.00114 | 6.48              | 1.48            | Cd300lb       |
| 1424815_at         | -4.72          | 4.79E-05 | 0.00116 | 4.81              | 1.48            | Gys2          |
| 1424308_at         | -4.71          | 4.87E-05 | 0.00117 | 10.16             | 0.97            | Slc24a3       |
| 1429909_at         | -4.71          | 4.87E-05 | 0.00117 | 5.49              | 1.44            | 2600010E01Rik |
| 1443921_at         | -4.7           | 5.10E-05 | 0.00121 | 4.91              | 1.55            | Ranbp3l       |
| 1453588_at         | -4.7           | 5.12E-05 | 0.00121 | 11.04             | 1.5             | Car3          |
| 1424316_at         | -4.7           | 5.12E-05 | 0.00121 | 6.32              | 1.75            | Slc25a19      |
| 1435383_x_at       | -4.69          | 5.22E-05 | 0.00123 | 11.45             | 0.98            | Ndn           |
| 1427410_at         | -4.68          | 5.29E-05 | 0.00124 | 7.73              | 1.23            | Dleu2         |
| 1428596_at         | -4.68          | 5.33E-05 | 0.00124 | 9.15              | 1.13            | Tbc1d9b       |
| 1417235_at         | -4.68          | 5.40E-05 | 0.00126 | 9.3               | 1.61            | Ehd3          |
| 1457799_at         | -4.67          | 5.44E-05 | 0.00126 | 5.85              | 1.62            | Kcns3         |
| 1417985_at         | -4.67          | 5.55E-05 | 0.00128 | 6.08              | 1.55            | Nrarp         |
| 1455664_at         | -4.66          | 5.60E-05 | 0.00128 | 5.25              | 1.58            | Rtn4rl1       |
| 1451563_at         | -4.66          | 5.61E-05 | 0.00128 | 7.18              | 1.63            | Emr4          |
| 1434188_at         | -4.66          | 5.67E-05 | 0.00129 | 8.17              | 1.28            | Slc16a12      |
| 1433536_at         | -4.66          | 5.69E-05 | 0.00129 | 6.11              | 1.57            | Lrp11         |
| 1428750_at         | -4.66          | 5.70E-05 | 0.00129 | 7.34              | 1.36            | Cdc42ep2      |
| 1423266_at         | -4.65          | 5.76E-05 | 0.00131 | 10.27             | 1.29            | 2810405K02Rik |
| 1433768_at         | -4.65          | 5.78E-05 | 0.00131 | 9.66              | 0.95            | Palld         |
| 1450974_at         | -4.65          | 5.88E-05 | 0.00132 | 10.25             | 1.22            | Timp4         |
| 1428140_at         | -4.64          | 5.95E-05 | 0.00134 | 11.41             | 0.86            | Oxct1         |
| 1423405_at         | -4.64          | 5.99E-05 | 0.00134 | 12.43             | 0.97            | Timp4         |
| 1449509_at         | -4.64          | 6.00E-05 | 0.00134 | 3.86              | 0.87            | Serf1         |
| 1423669_at         | -4.64          | 6.03E-05 | 0.00134 | 8.9               | 1.41            | Col1a1        |
| 1434245_a_at       | -4.64          | 6.10E-05 | 0.00134 | 8.93              | 1.12            | Cybasc3       |
| 1419182_at         | -4.63          | 6.14E-05 | 0.00134 | 9.77              | 0.96            | Svep1         |
| 1424349_a_at       | -4.63          | 6.14E-05 | 0.00134 | 13.08             | 1.07            | Lpgat1        |
| 1426971_at         | -4.63          | 6.17E-05 | 0.00135 | 6.16              | 1.56            | Ube1l         |
| 1448392_at         | -4.63          | 6.21E-05 | 0.00135 | 13.14             | 0.8             | Sparc         |
| 1450065_at         | -4.62          | 6.32E-05 | 0.00137 | 7.28              | 1.32            | Adcy7         |
| 1430623_s_at       | -4.62          | 6.34E-05 | 0.00137 | 8.77              | 1.13            | Obfc2a        |
| 1416239_at         | -4.62          | 6.43E-05 | 0.00139 | 6.6               | 1.41            | Ass1          |
| 1455099_at         | -4.61          | 6.46E-05 | 0.00139 | 4.69              | 1.35            | Mogat2        |
| 1424187_at         | -4.61          | 6.50E-05 | 0.0014  | 11.36             | 0.86            | Ccdc80        |
| 1429028_at         | -4.61          | 6.57E-05 | 0.00141 | 11.01             | 0.82            | Dock11        |

| Probe <sup>1</sup> | t <sup>2</sup> | p-value  | q-value | Mean <sup>3</sup> | FC <sup>4</sup> | Symbol        |
|--------------------|----------------|----------|---------|-------------------|-----------------|---------------|
| 1450409_a_at       | -4.61          | 6.63E-05 | 0.00142 | 9.76              | 0.85            | 4930570C03Rik |
| 1437643_at         | -4.6           | 6.66E-05 | 0.00142 | 4.94              | 1.26            | Cenpj         |
| 1429524_at         | -4.6           | 6.68E-05 | 0.00142 | 5.04              | 1.08            | Myo1f         |
| 1425343_at         | -4.6           | 6.73E-05 | 0.00142 | 3.24              | 0.77            | Hdhd3         |
| 1418367_x_at       | -4.6           | 6.76E-05 | 0.00142 | 11.15             | 0.9             | Hist2h2aa1    |
| 1424065_at         | -4.6           | 6.76E-05 | 0.00142 | 9.57              | 0.9             | Edem1         |
| 1453156_s_at       | -4.6           | 6.77E-05 | 0.00142 | 8.97              | 1.03            | Zadh1         |
| 1424336_at         | -4.6           | 6.80E-05 | 0.00142 | 4.01              | 0.91            | Ppcdc         |
| 1455673_at         | -4.6           | 6.81E-05 | 0.00142 | 4.08              | 0.95            | Alkbh2        |
| 1455428_at         | -4.59          | 6.92E-05 | 0.00144 | 7.32              | 1.26            | A930008G19Rik |
| 1419509_a_at       | -4.58          | 7.05E-05 | 0.00145 | 9.13              | 0.88            | Nagk          |
| 1422760_at         | -4.58          | 7.19E-05 | 0.00147 | 4.32              | 1.13            | Padi4         |
| 1433954_at         | -4.57          | 7.32E-05 | 0.00148 | 7.9               | 1.15            | 4632419I22Rik |
| 1451567_a_at       | -4.57          | 7.32E-05 | 0.00148 | 9.36              | 1.12            | Ifi203        |
| 1418982_at         | -4.57          | 7.34E-05 | 0.00148 | 11.18             | 1.03            | Cebpa         |
| 1439755_at         | -4.57          | 7.37E-05 | 0.00148 | 6.2               | 1.21            | Sipa111       |
| 1436101_at         | -4.56          | 7.48E-05 | 0.0015  | 6.19              | 1.4             | Pank2         |
| 1416432_at         | -4.56          | 7.63E-05 | 0.00152 | 11.88             | 1               | Pfkfb3        |
| 1437459_x_at       | -4.55          | 7.70E-05 | 0.00153 | 3.41              | 0.75            | Slc25a19      |
| 1451564_at         | -4.54          | 8.05E-05 | 0.00157 | 8.47              | 1.11            | Parp14        |
| 1419249_at         | -4.53          | 8.11E-05 | 0.00158 | 9.23              | 1.03            | Pftk1         |
| 1434274_at         | -4.53          | 8.13E-05 | 0.00158 | 10.88             | 1.01            | Mycbp2        |
| 1436618_at         | -4.53          | 8.14E-05 | 0.00158 | 5.28              | 1.44            | Sfxn5         |
| 1436974_at         | -4.53          | 8.22E-05 | 0.0016  | 5.38              | 1.38            | A230069A22Rik |
| 1460372_at         | -4.53          | 8.29E-05 | 0.00161 | 4.6               | 1.05            | Duoxa1        |
| 1428892_at         | -4.52          | 8.44E-05 | 0.00163 | 5.43              | 1.3             | Ppil1         |
| 1422558_at         | -4.52          | 8.50E-05 | 0.00164 | 4.36              | 1.54            | Gamt          |
| 1434342_at         | -4.52          | 8.54E-05 | 0.00164 | 6.18              | 1.57            | S100b         |
| 1434241_at         | -4.52          | 8.55E-05 | 0.00164 | 4.31              | 0.96            | Wdr67         |
| 1417702_a_at       | -4.51          | 8.63E-05 | 0.00165 | 10.18             | 0.99            | Hnmt          |
| 1454717_at         | -4.51          | 8.74E-05 | 0.00166 | 7.62              | 1.02            | Ankrd27       |
| 1424110_a_at       | -4.51          | 8.78E-05 | 0.00167 | 9.82              | 0.88            | Nme1          |
| 1426434_at         | -4.51          | 8.79E-05 | 0.00167 | 10.1              | 1.08            | Tmem43        |
| 1442508_at         | -4.5           | 8.89E-05 | 0.00168 | 8.63              | 1.05            | 4933404M19Rik |
| 1448550_at         | -4.5           | 8.99E-05 | 0.00169 | 9.5               | 1.37            | Lbp           |
| 1435541_at         | -4.5           | 9.07E-05 | 0.0017  | 6.38              | 1.72            | Btc           |
| 1453434_at         | -4.49          | 9.08E-05 | 0.0017  | 5.69              | 1.37            | 1110019D14Rik |
| 1431251_at         | -4.49          | 9.11E-05 | 0.00171 | 4.45              | 1.27            | Lrrc3         |
| 1435404_at         | -4.49          | 9.12E-05 | 0.00171 | 3.8               | 0.78            | Disp2         |
| 1433490_s_at       | -4.49          | 9.24E-05 | 0.00172 | 10.57             | 0.96            | Epb4.1I2      |
| 1434937_at         | -4.48          | 9.53E-05 | 0.00177 | 12.06             | 0.98            | Mycbp2        |
| 1423369_at         | -4.48          | 9.57E-05 | 0.00178 | 11.76             | 1.31            | Fmr1          |
| 1444201_at         | -4.48          | 9.60E-05 | 0.00178 | 3.78              | 0.74            | Cep135        |
| 1449147_at         | -4.47          | 9.67E-05 | 0.00179 | 10.89             | 1.2             | Chst1         |
| 1455400_at         | -4.47          | 9.71E-05 | 0.00179 | 4.04              | 1.06            | Ddah1         |
| 1426806_at         | -4.47          | 9.80E-05 | 0.0018  | 9.13              | 1.15            | Obfc2a        |
| 1416406_at         | -4.47          | 9.81E-05 | 0.0018  | 9.07              | 0.92            | Pea15a        |
| 1425829_a_at       | -4.47          | 9.82E-05 | 0.0018  | 9.7               | 1.49            | Steap4        |
| 1418474_at         | -4.47          | 9.84E-05 | 0.0018  | 6.25              | 1.77            | 1500005A01Rik |
| 1424444_a_at       | -4.47          | 9.87E-05 | 0.0018  | 8.32              | 1.04            | 1600014C10Rik |
| 1433855_at         | -4.47          | 9.88E-05 | 0.0018  | 9.58              | 1.36            | Abat          |
| 1418987_at         | -4.46          | 9.97E-05 | 0.00182 | 8.93              | 1.21            | Pla2g2d       |
| 1435271_at         | -4.46          | 9.97E-05 | 0.00182 | 4.49              | 1.02            | Irf3          |

| Probe <sup>1</sup> | t <sup>2</sup> | p-value | q-value | Mean <sup>3</sup> | FC <sup>4</sup> | Symbol             |
|--------------------|----------------|---------|---------|-------------------|-----------------|--------------------|
| 1460197_a_at       | -4.46          | 0.0001  | 0.00183 | 11.51             | 1.14            | Steap4             |
| 1422003_at         | -4.46          | 0.0001  | 0.00184 | 4.76              | 2.32            | Cxcr5              |
| 1416619_at         | -4.46          | 0.0001  | 0.00184 | 9.82              | 0.88            | 4632428N05Rik      |
| 1454632_at         | -4.45          | 0.0001  | 0.00185 | 4.29              | 1.32            | 6330442E10Rik      |
| 1434139_at         | -4.44          | 0.0001  | 0.00187 | 8.32              | 1.01            | Parp11             |
| 1423023_at         | -4.44          | 0.00011 | 0.00188 | 6.34              | 1.94            | Sfrp5              |
| 1416221_at         | -4.44          | 0.00011 | 0.00188 | 11.62             | 0.81            | Fstl1              |
| 1423596_at         | -4.44          | 0.00011 | 0.00188 | 7.81              | 1.54            | Nek6               |
| 1435031_at         | -4.44          | 0.00011 | 0.0019  | 10.9              | 0.86            | Tmem120a           |
| 1440890_a_at       | -4.43          | 0.00011 | 0.00191 | 8.45              | 1.05            | Zfp809             |
| 1437853_x_at       | -4.43          | 0.00011 | 0.00191 | 10.14             | 0.92            | Ndn                |
| 1419648_at         | -4.43          | 0.00011 | 0.00192 | 10.1              | 0.81            | Myo1c              |
| 1441098_at         | -4.43          | 0.00011 | 0.00193 | 4.48              | 1.45            | Pnlcd1             |
| 1438038_at         | -4.43          | 0.00011 | 0.00193 | 8.99              | 0.91            | 4930402H24Rik      |
| 1423644_at         | -4.42          | 0.00011 | 0.00195 | 9.5               | 1.17            | Aco1               |
| 1417633_at         | -4.42          | 0.00011 | 0.00196 | 10.49             | 1.38            | Sod3               |
| 1451625_a_at       | -4.41          | 0.00011 | 0.00198 | 3.75              | 1.11            | C8g                |
| 1427295_at         | -4.41          | 0.00012 | 0.00202 | 9.74              | 0.85            | Slc38a10           |
| 1434572_at         | -4.4           | 0.00012 | 0.00203 | 7.66              | 1.29            | Hdac9              |
| 1418710_at         | -4.39          | 0.00012 | 0.00206 | 11.03             | 0.85            | Cd59a              |
| 1431109_at         | -4.39          | 0.00012 | 0.00207 | 5.96              | 1.45            | Prr16              |
| 1452799_at         | -4.38          | 0.00012 | 0.0021  | 7.39              | 1.24            | Fggy               |
| 1443939_at         | -4.38          | 0.00013 | 0.00214 | 5.23              | 1.55            | OTTMUSG00000008561 |
| 1424317_at         | -4.38          | 0.00013 | 0.00214 | 6.21              | 1.36            | Slc25a19           |
| 1419573_a_at       | -4.38          | 0.00013 | 0.00214 | 13.77             | 0.65            | Lgals1             |
| 1434754_at         | -4.37          | 0.00013 | 0.00216 | 7.34              | 1.06            | Garnl4             |
| 1424857_a_at       | -4.37          | 0.00013 | 0.00216 | 9.62              | 1.05            | NA                 |
| 1428670_at         | -4.37          | 0.00013 | 0.00217 | 4.62              | 1.1             | 2610305J24Rik      |
| 1424906_at         | -4.37          | 0.00013 | 0.00218 | 9.34              | 1.13            | Pqlc3              |
| 1435553_at         | -4.36          | 0.00013 | 0.00221 | 10.7              | 0.89            | Pdzd2              |
| 1442580_at         | -4.36          | 0.00013 | 0.00223 | 6.97              | 1.48            | A530020G20Rik      |
| 1434737_at         | -4.34          | 0.00014 | 0.00229 | 4.82              | 0.99            | Obfc1              |
| 1432562_at         | -4.34          | 0.00014 | 0.0023  | 5.6               | 1.26            | 1110006G14Rik      |
| 1454934_at         | -4.34          | 0.00014 | 0.0023  | 6.88              | 1.25            | Ppm1f              |
| 1450493_at         | -4.34          | 0.00014 | 0.0023  | 4.73              | 1.03            | Kiss1r             |
| 1438378_at         | -4.33          | 0.00014 | 0.00233 | 4.73              | 1.2             | 1700013G23Rik      |
| 1439995_at         | -4.33          | 0.00014 | 0.00234 | 5.49              | 1.49            | Nhedc2             |
| 1427228_at         | -4.33          | 0.00015 | 0.00234 | 8.17              | 1.09            | Palld              |
| 1454157_a_at       | -4.33          | 0.00015 | 0.00234 | 7.69              | 1.47            | Pla2g2d            |
| 1432489_a_at       | -4.32          | 0.00015 | 0.00237 | 6.04              | 1.19            | 2410187C16Rik      |
| 1452621_at         | -4.32          | 0.00015 | 0.00237 | 10.02             | 0.84            | Pcbd2              |
| 1426785_s_at       | -4.32          | 0.00015 | 0.00238 | 12.63             | 0.69            | Mgll               |
| 1439834_at         | -4.32          | 0.00015 | 0.00238 | 9.77              | 0.86            | 2400009B08Rik      |
| 1457869_at         | -4.32          | 0.00015 | 0.00238 | 4.98              | 1.21            | LOC100041694       |
| 1417751_at         | -4.31          | 0.00015 | 0.00244 | 7.34              | 1.12            | Stk10              |
| 1434729_at         | -4.31          | 0.00015 | 0.00244 | 4.74              | 0.97            | AK129302           |
| 1428947_at         | -4.31          | 0.00015 | 0.00244 | 7.46              | 2.09            | 2010001M09Rik      |
| 1426879_at         | -4.31          | 0.00016 | 0.00246 | 7.5               | 1.13            | 1190005F20Rik      |
| 1457031_at         | -4.3           | 0.00016 | 0.00249 | 6.95              | 1.43            | Fsd2               |
| 1428988_at         | -4.29          | 0.00016 | 0.00251 | 5.59              | 1.19            | Abcc3              |
| 1449222_at         | -4.29          | 0.00016 | 0.00251 | 4.85              | 1.18            | Ebi3               |
| 1449846_at         | -4.29          | 0.00016 | 0.00252 | 8.45              | 1.03            | Ear2               |
| 1455070_at         | -4.28          | 0.00016 | 0.00256 | 8.36              | 1.05            | Dcp2               |

| Probe <sup>1</sup> | t <sup>2</sup> | p-value | q-value | Mean <sup>3</sup> | FC <sup>4</sup> | Symbol        |
|--------------------|----------------|---------|---------|-------------------|-----------------|---------------|
| 1451969_s_at       | -4.28          | 0.00016 | 0.00256 | 10.25             | 0.9             | Parp3         |
| 1416390_at         | -4.28          | 0.00017 | 0.00257 | 8.62              | 0.91            | Rcbtb2        |
| 1452223_s_at       | -4.28          | 0.00017 | 0.00259 | 10.12             | 0.81            | Gcap14        |
| 1422437_at         | -4.27          | 0.00017 | 0.00261 | 11                | 0.79            | Col5a2        |
| 1451489_at         | -4.27          | 0.00017 | 0.00263 | 7.22              | 1.38            | Slc25a35      |
| 1434126_at         | -4.27          | 0.00017 | 0.00263 | 10.03             | 0.8             | 4930402H24Rik |
| 1417686_at         | -4.27          | 0.00017 | 0.00265 | 10.14             | 1.12            | Lgals12       |
| 1425850_a_at       | -4.27          | 0.00017 | 0.00265 | 7.4               | 1.51            | Nek6          |
| 1419649_s_at       | -4.27          | 0.00017 | 0.00265 | 10.46             | 0.81            | Myo1c         |
| 1432164_a_at       | -4.26          | 0.00017 | 0.00265 | 11.79             | 0.84            | Gcsh          |
| 1425294_at         | -4.26          | 0.00017 | 0.00265 | 3.27              | 0.73            | Slamf8        |
| 1445597_s_at       | -4.26          | 0.00017 | 0.00265 | 13.94             | 0.56            | Hrasls3       |
| 1427231_at         | -4.26          | 0.00018 | 0.00268 | 6.64              | 1.54            | Robo1         |
| 1422504_at         | -4.26          | 0.00018 | 0.00268 | 5.6               | 1.56            | Glrb          |
| 1423602_at         | -4.26          | 0.00018 | 0.00268 | 3.61              | 0.92            | Traf1         |
| 1428656_at         | -4.26          | 0.00018 | 0.00268 | 7.63              | 1.05            | Rnasen        |
| 1421045_at         | -4.26          | 0.00018 | 0.00268 | 4.7               | 1.17            | Mrc2          |
| 1435327_at         | -4.25          | 0.00018 | 0.0027  | 10.96             | 1.3             | AW112037      |
| 1419692_a_at       | -4.25          | 0.00018 | 0.0027  | 9.89              | 0.98            | Ltc4s         |
| 1416389_a_at       | -4.25          | 0.00018 | 0.0027  | 10.3              | 0.81            | Rcbtb2        |
| 1450095_a_at       | -4.25          | 0.00018 | 0.00273 | 9.32              | 0.89            | Acyp1         |
| 1449131_s_at       | -4.25          | 0.00018 | 0.00273 | 12.94             | 0.8             | Cd1d1         |
| 1456125_a_at       | -4.24          | 0.00018 | 0.00274 | 12.19             | 0.65            | Dynll1        |
| 1426657_s_at       | -4.24          | 0.00018 | 0.00275 | 9.25              | 1.25            | Phgdh         |
| 1419882_at         | -4.24          | 0.00019 | 0.00276 | 4.25              | 1.34            | Pfkfb3        |
| 1452893_s_at       | -4.24          | 0.00019 | 0.00277 | 3.4               | 0.67            | 2310040A07Rik |
| 1449412_at         | -4.24          | 0.00019 | 0.00279 | 10.22             | 0.87            | 1810046J19Rik |
| 1419706_a_at       | -4.23          | 0.00019 | 0.00282 | 11.56             | 0.8             | Akap12        |
| 1456442_at         | -4.23          | 0.00019 | 0.00282 | 5.32              | 1.36            | Rab3il1       |
| 1430133_at         | -4.23          | 0.00019 | 0.00283 | 8.53              | 1.01            | Tbc1d8b       |
| 1425084_at         | -4.23          | 0.00019 | 0.00283 | 5.44              | 2.08            | Gimap7        |
| 1437360_at         | -4.23          | 0.00019 | 0.00283 | 7.58              | 1               | Pcdh19        |
| 1426435_at         | -4.23          | 0.00019 | 0.00283 | 10.27             | 1.03            | Tmem135       |
| 1418884_x_at       | -4.22          | 0.0002  | 0.00285 | 13.64             | 0.72            | Tuba1a        |
| 1419498_at         | -4.22          | 0.0002  | 0.00285 | 5.91              | 1.35            | Tmigd1        |
| 1421871_at         | -4.22          | 0.0002  | 0.00285 | 12.44             | 0.7             | Sh3bgrl       |
| 1448786_at         | -4.21          | 0.0002  | 0.00292 | 9.3               | 0.91            | 1100001H23Rik |
| 1456584_x_at       | -4.21          | 0.0002  | 0.00292 | 8.39              | 1.2             | Phgdh         |
| 1418206_at         | -4.2           | 0.00021 | 0.00295 | 5.52              | 1.12            | Sdf2l1        |
| 1439758_at         | -4.2           | 0.00021 | 0.003   | 6.14              | 1.62            | Als2cr12      |
| 1447570_s_at       | -4.19          | 0.00021 | 0.003   | 5.1               | 1.68            | Akap10        |
| 1418057_at         | -4.19          | 0.00021 | 0.003   | 6.81              | 1.45            | Tiam1         |
| 1436453_at         | -4.19          | 0.00021 | 0.00301 | 13.07             | 0.82            | BB144871      |
| 1418482_at         | -4.19          | 0.00021 | 0.00303 | 5.31              | 1.12            | Cyb561d2      |
| 1451122_at         | -4.19          | 0.00022 | 0.00305 | 8.27              | 1.06            | Idi1          |
| 1448967_at         | -4.19          | 0.00022 | 0.00305 | 9.71              | 0.79            | Nipsnap3a     |
| 1422601_at         | -4.18          | 0.00022 | 0.00308 | 8.83              | 0.92            | Serpib9       |
| 1449059_a_at       | -4.18          | 0.00022 | 0.00308 | 13.08             | 0.67            | Oxct1         |
| 1434999_at         | -4.18          | 0.00022 | 0.00309 | 7.99              | 1.07            | Suv420h1      |
| 1417098_s_at       | -4.18          | 0.00022 | 0.00309 | 9.25              | 0.81            | Mecr          |
| 1452540_a_at       | -4.18          | 0.00022 | 0.00309 | 12.8              | 0.69            | Hist1h2bp     |
| 1449954_at         | -4.18          | 0.00022 | 0.0031  | 5.48              | 1.07            | Hyal1         |
| 1434291_a_at       | -4.18          | 0.00022 | 0.0031  | 9.33              | 0.89            | Serf1         |

| Probe <sup>1</sup> | t <sup>2</sup> | p-value | q-value | Mean <sup>3</sup> | FC <sup>4</sup> | Symbol        |
|--------------------|----------------|---------|---------|-------------------|-----------------|---------------|
| 1423706_a_at       | -4.17          | 0.00023 | 0.00312 | 10.81             | 0.79            | Pgd           |
| 1423518_at         | -4.17          | 0.00023 | 0.00313 | 6.26              | 1.19            | Csk           |
| 1451218_at         | -4.17          | 0.00023 | 0.00313 | 9.88              | 0.9             | Edem1         |
| 1436045_at         | -4.17          | 0.00023 | 0.00313 | 4.38              | 0.87            | Tsga10        |
| 1439885_at         | -4.17          | 0.00023 | 0.00313 | 7.46              | 1.14            | Hoxc5         |
| 1452654_at         | -4.16          | 0.00023 | 0.00317 | 7.61              | 1.4             | Zdhhc2        |
| 1419292_at         | -4.16          | 0.00023 | 0.00317 | 10.41             | 0.83            | Htra3         |
| 1418980_a_at       | -4.16          | 0.00023 | 0.00318 | 4.69              | 1.07            | Cnp           |
| 1444449_at         | -4.16          | 0.00023 | 0.00319 | 3.31              | 0.63            | Usp18         |
| 1449229_a_at       | -4.16          | 0.00024 | 0.00321 | 7.16              | 1.31            | Cdkl2         |
| 1422191_at         | -4.16          | 0.00024 | 0.00321 | 4.06              | 1               | Cd200r1       |
| 1427294_a_at       | -4.15          | 0.00024 | 0.00323 | 10                | 0.76            | Slc38a10      |
| 1422580_at         | -4.15          | 0.00024 | 0.00324 | 7.05              | 1.33            | Myl4          |
| 1418327_at         | -4.15          | 0.00024 | 0.00325 | 9.34              | 0.91            | 1110058L19Rik |
| 1433727_at         | -4.15          | 0.00024 | 0.00328 | 11.21             | 1.04            | Glb1l2        |
| 1436833_x_at       | -4.15          | 0.00024 | 0.00328 | 8.76              | 0.96            | Ttll1         |
| 1429712_at         | -4.14          | 0.00024 | 0.00329 | 11.01             | 0.77            | RP24-87L14.2  |
| 1452067_at         | -4.14          | 0.00025 | 0.0033  | 8.78              | 1.01            | Asahl         |
| 1448619_at         | -4.14          | 0.00025 | 0.0033  | 4.26              | 1.13            | Dhcr7         |
| 1448259_at         | -4.14          | 0.00025 | 0.00331 | 11.24             | 0.79            | Fstl1         |
| 1446582_at         | -4.14          | 0.00025 | 0.00333 | 4.71              | 1.25            | Poln          |
| 1437875_at         | -4.14          | 0.00025 | 0.00334 | 10.23             | 0.91            | Bicd2         |
| 1437325_x_at       | -4.13          | 0.00025 | 0.00336 | 6.74              | 1.17            | Aldh18a1      |
| 1427100_at         | -4.13          | 0.00025 | 0.00337 | 5.42              | 1.44            | Metrn         |
| 1426690_a_at       | -4.13          | 0.00025 | 0.00337 | 8.6               | 1.07            | Srebfl        |
| 1443931_at         | -4.13          | 0.00026 | 0.00338 | 3.83              | 0.74            | Zfp617        |
| 1434592_at         | -4.13          | 0.00026 | 0.00339 | 5.77              | 1.07            | Slc16a10      |
| 1418382_at         | -4.12          | 0.00026 | 0.00341 | 11.11             | 1.08            | Apcdd1        |
| 1452402_at         | -4.12          | 0.00026 | 0.00343 | 5.69              | 1.15            | Uchl3         |
| 1426092_a_at       | -4.12          | 0.00026 | 0.00344 | 4.16              | 0.85            | Trim34        |
| 1434864_at         | -4.12          | 0.00026 | 0.00345 | 8.42              | 0.96            | Nipa1         |
| 1434436_at         | -4.11          | 0.00027 | 0.00347 | 8.99              | 1.24            | Morc4         |
| 1435331_at         | -4.11          | 0.00027 | 0.00348 | 7.43              | 1.95            | Pyhin1        |
| 1441404_at         | -4.11          | 0.00027 | 0.00348 | 3.95              | 0.89            | Pafah1b1      |
| 1430238_at         | -4.11          | 0.00027 | 0.00349 | 3.91              | 0.71            | Got1l1        |
| 1429394_at         | -4.11          | 0.00027 | 0.00349 | 4.12              | 0.89            | A130010J15Rik |
| 1425784_a_at       | -4.11          | 0.00027 | 0.00349 | 8.13              | 1.49            | Olfm1         |
| 1449267_at         | -4.11          | 0.00027 | 0.0035  | 6.19              | 1.16            | Chid1         |
| 1452338_s_at       | -4.11          | 0.00027 | 0.0035  | 7.87              | 0.99            | Itsn1         |
| 1428141_at         | -4.11          | 0.00027 | 0.0035  | 8.57              | 0.89            | Gga2          |
| 1419259_at         | -4.11          | 0.00027 | 0.0035  | 10.78             | 0.74            | Rsu1          |
| 1439070_x_at       | -4.11          | 0.00027 | 0.00351 | 9.01              | 0.74            | 4933439C20Rik |
| 1428243_at         | -4.1           | 0.00028 | 0.00355 | 4.58              | 1.02            | 1700021K19Rik |
| 1433564_at         | -4.1           | 0.00028 | 0.00357 | 9.74              | 0.78            | Dgkd          |
| 1435691_at         | -4.1           | 0.00028 | 0.00357 | 6.85              | 1.49            | C630028N24Rik |
| 1426876_at         | -4.1           | 0.00028 | 0.00357 | 3.84              | 0.98            | Pm20d1        |
| 1441752_at         | -4.1           | 0.00028 | 0.00357 | 7.45              | 1.17            | Art3          |
| 1455179_at         | -4.09          | 0.00028 | 0.00357 | 8.25              | 1.02            | Mpp7          |
| 1439835_x_at       | -4.09          | 0.00028 | 0.00358 | 5.22              | 1.1             | Abcd2         |
| 1417339_a_at       | -4.09          | 0.00028 | 0.0036  | 12.26             | 0.62            | Dynll1        |
| 1420123_at         | -4.09          | 0.00029 | 0.00361 | 9.63              | 0.8             | Tcta          |
| 1460592_at         | -4.09          | 0.00029 | 0.00362 | 8.88              | 1.12            | Epb4.1l1      |
| 1417298_at         | -4.09          | 0.00029 | 0.00363 | 8.81              | 1.06            | Ebpl          |

| Probe <sup>1</sup> | t <sup>2</sup> | p-value | q-value | Mean <sup>3</sup> | FC <sup>4</sup> | Symbol        |
|--------------------|----------------|---------|---------|-------------------|-----------------|---------------|
| 1417535_at         | -4.08          | 0.00029 | 0.00364 | 7.86              | 1.03            | Fbxo25        |
| 1417604_at         | -4.08          | 0.00029 | 0.00369 | 8.86              | 0.95            | Camk1         |
| 1442294_at         | -4.08          | 0.0003  | 0.00372 | 9.08              | 0.95            | A530053G22Rik |
| 1438411_at         | -4.07          | 0.0003  | 0.00374 | 6.12              | 2.68            | Gpr81         |
| 1416108_a_at       | -4.07          | 0.0003  | 0.00374 | 10.13             | 0.74            | Tmed3         |
| 1429830_a_at       | -4.07          | 0.0003  | 0.00375 | 11.03             | 0.8             | Cd59a         |
| 1437416_at         | -4.07          | 0.0003  | 0.00375 | 10.76             | 0.85            | BC034902      |
| 1450519_a_at       | -4.07          | 0.0003  | 0.00376 | 7.29              | 1.17            | Prkaca        |
| 1418366_at         | -4.07          | 0.0003  | 0.00376 | 10.45             | 0.85            | Hist2h2aa1    |
| 1418128_at         | -4.07          | 0.0003  | 0.00376 | 9.54              | 0.84            | Adcy6         |
| 1460424_at         | -4.07          | 0.0003  | 0.00377 | 9.03              | 0.78            | Tmem160       |
| 1452738_at         | -4.07          | 0.0003  | 0.00377 | 6.49              | 1.16            | Stoml1        |
| 1423218_a_at       | -4.07          | 0.0003  | 0.00377 | 8.55              | 0.83            | Mrpl49        |
| 1423619_at         | -4.06          | 0.00031 | 0.00383 | 7.31              | 2.05            | Rasd1         |
| 1449626_s_at       | -4.06          | 0.00031 | 0.00383 | 9.7               | 0.75            | Acbd4         |
| 1421963_a_at       | -4.06          | 0.00031 | 0.00385 | 4.3               | 0.92            | Cdc25b        |
| 1460351_at         | -4.05          | 0.00031 | 0.00385 | 13.17             | 0.75            | S100a11       |
| 1428033_at         | -4.05          | 0.00031 | 0.00385 | 4.38              | 0.9             | EG245174      |
| 1451318_a_at       | -4.05          | 0.00031 | 0.00385 | 9.27              | 0.87            | Lyn           |
| 1433446_at         | -4.05          | 0.00032 | 0.00387 | 10.22             | 0.77            | Hmgcs1        |
| 1434262_at         | -4.05          | 0.00032 | 0.00388 | 3.16              | 0.66            | Cog1          |
| 1449145_a_at       | -4.05          | 0.00032 | 0.0039  | 14.12             | 0.54            | Cav1          |
| 1454876_at         | -4.05          | 0.00032 | 0.0039  | 5.05              | 0.99            | Rab23         |
| 1424471_at         | -4.05          | 0.00032 | 0.0039  | 7.07              | 1.13            | Rapgef3       |
| 1436519_a_at       | -4.04          | 0.00032 | 0.00393 | 9.71              | 0.88            | 1110057K04Rik |
| 1424334_at         | -4.04          | 0.00033 | 0.00396 | 7.32              | 1.18            | Tspan17       |
| 1450981_at         | -4.04          | 0.00033 | 0.00397 | 10.01             | 1.16            | Cnn2          |
| 1460629_at         | -4.04          | 0.00033 | 0.004   | 4.37              | 1.13            | Trim16        |
| 1440825_s_at       | -4.03          | 0.00034 | 0.00408 | 4.4               | 0.98            | Ccdc28a       |
| 1439489_at         | -4.03          | 0.00034 | 0.0041  | 7.57              | 0.97            | Gpr120        |
| 1433504_at         | -4.02          | 0.00035 | 0.00415 | 9.9               | 1.23            | Pygb          |
| 1427411_s_at       | -4.02          | 0.00035 | 0.00415 | 7.07              | 1.03            | Dleu2         |
| 1452655_at         | -4.02          | 0.00035 | 0.00415 | 6.03              | 1.3             | Zdhhc2        |
| 1424156_at         | -4.02          | 0.00035 | 0.00416 | 6.2               | 1.19            | Rbl1          |
| 1449303_at         | -4.01          | 0.00035 | 0.0042  | 8.97              | 0.94            | Sesn3         |
| 1428082_at         | -4.01          | 0.00035 | 0.00422 | 9.92              | 0.79            | AcsI5         |
| 1458678_at         | -4.01          | 0.00035 | 0.00422 | 4.63              | 0.94            | Ndufab1       |
| 1417392_a_at       | -4.01          | 0.00036 | 0.00424 | 3.93              | 0.74            | Slc7a7        |
| 1416897_at         | -4.01          | 0.00036 | 0.00424 | 9.51              | 0.83            | Parp9         |
| 1416298_at         | -4.01          | 0.00036 | 0.00426 | 8.41              | 0.87            | Mmp9          |
| 1452333_at         | -4.01          | 0.00036 | 0.00426 | 7.27              | 1.04            | Smarca2       |
| 1424350_s_at       | -4             | 0.00037 | 0.00431 | 9.41              | 1.17            | Lpgat1        |
| 1435628_x_at       | -4             | 0.00037 | 0.00431 | 7                 | 1.18            | BC005512      |
| 1437212_at         | -4             | 0.00037 | 0.00432 | 5.3               | 1.04            | Zfp420        |
| 1416804_at         | -4             | 0.00037 | 0.00432 | 6.89              | 1.22            | Ehbp1l1       |
| 1452606_at         | -4             | 0.00037 | 0.00432 | 3.41              | 0.76            | Mnd1          |
| 1439944_at         | -4             | 0.00037 | 0.00432 | 4.94              | 0.98            | NA            |
| 1442648_at         | -3.99          | 0.00037 | 0.00434 | 4.36              | 0.89            | Zfp563        |
| 1429058_at         | -3.99          | 0.00037 | 0.00436 | 8.22              | 1.12            | Tmem107       |
| 1428526_at         | -3.99          | 0.00038 | 0.00438 | 9.46              | 0.81            | Lsmd1         |
| 1419120_at         | -3.99          | 0.00038 | 0.00439 | 6.47              | 1.29            | Lyl1          |
| 1433610_at         | -3.99          | 0.00038 | 0.0044  | 3.69              | 0.73            | AA986860      |
| 1453836_a_at       | -3.99          | 0.00038 | 0.0044  | 12.05             | 0.75            | Mgll          |

| Probe <sup>1</sup> | t <sup>2</sup> | p-value | q-value | Mean <sup>3</sup> | FC <sup>4</sup> | Symbol        |
|--------------------|----------------|---------|---------|-------------------|-----------------|---------------|
| 1441559_at         | -3.99          | 0.00038 | 0.0044  | 5.14              | 1.4             | LOC627626     |
| 1423557_at         | -3.98          | 0.00038 | 0.00441 | 6.63              | 1.07            | Ifngr2        |
| 1453739_at         | -3.98          | 0.00038 | 0.00441 | 7.75              | 1.01            | Tmem126b      |
| 1426052_at         | -3.98          | 0.00038 | 0.00441 | 5.87              | 1.14            | Mlh3          |
| 1416589_at         | -3.98          | 0.00038 | 0.00441 | 13.34             | 0.69            | Sparc         |
| 1431920_a_at       | -3.98          | 0.00038 | 0.00442 | 3.87              | 0.9             | 2010004A03Rik |
| 1417527_at         | -3.98          | 0.00038 | 0.00442 | 6.08              | 1.22            | Ap3m2         |
| 1441640_at         | -3.98          | 0.00039 | 0.00443 | 3.44              | 0.65            | Socs5         |
| 1419426_s_at       | -3.98          | 0.00039 | 0.00443 | 9.73              | 1.03            | Ccl21a        |
| 1456770_at         | -3.98          | 0.00039 | 0.00444 | 4.74              | 0.94            | Zfp14         |
| 1423765_at         | -3.97          | 0.00039 | 0.00448 | 7.09              | 1.05            | Athl1         |
| 1419103_a_at       | -3.97          | 0.00039 | 0.00449 | 8.37              | 0.86            | Abhd6         |
| 1417634_at         | -3.97          | 0.0004  | 0.00449 | 8.65              | 1.38            | Sod3          |
| 1434975_x_at       | -3.97          | 0.0004  | 0.0045  | 10.76             | 0.69            | 4933439C20Rik |
| 1429468_at         | -3.97          | 0.0004  | 0.0045  | 6.89              | 1.06            | 1110018F16Rik |
| 1435194_at         | -3.97          | 0.0004  | 0.00451 | 9.73              | 0.71            | Hspa4         |
| 1419027_s_at       | -3.96          | 0.0004  | 0.00457 | 9.55              | 0.81            | Gltf          |
| 1423046_s_at       | -3.96          | 0.00041 | 0.00458 | 9.73              | 0.71            | Ncbp2         |
| 1451555_at         | -3.96          | 0.00041 | 0.00459 | 7.07              | 1.1             | Nln           |
| 1417470_at         | -3.96          | 0.00041 | 0.0046  | 5.65              | 1.25            | Apobec3       |
| 1458236_at         | -3.96          | 0.00041 | 0.00463 | 3.48              | 0.75            | NA            |
| 1436039_at         | -3.96          | 0.00041 | 0.00463 | 7.37              | 1.21            | Cmah          |
| 1417189_at         | -3.95          | 0.00042 | 0.00473 | 10.91             | 0.63            | Psme2         |
| 1435191_at         | -3.94          | 0.00043 | 0.00475 | 5.48              | 2.52            | Cdsn          |
| 1431056_a_at       | -3.94          | 0.00043 | 0.0048  | 14.08             | 0.45            | Lpl           |
| 1460444_at         | -3.94          | 0.00043 | 0.00481 | 8.25              | 0.88            | Arrb1         |
| 1442023_at         | -3.94          | 0.00043 | 0.00482 | 5.61              | 2.29            | A530030E21Rik |
| 1434745_at         | -3.94          | 0.00044 | 0.00484 | 10.72             | 0.98            | Ccnd2         |
| 1456023_at         | -3.94          | 0.00044 | 0.00484 | 5.12              | 1               | 2210010B09Rik |
| 1456337_at         | -3.94          | 0.00044 | 0.00484 | 5.14              | 1.13            | Centd1        |
| 1418770_at         | -3.93          | 0.00044 | 0.00489 | 6.77              | 1.71            | Cd2           |
| 1454084_a_at       | -3.93          | 0.00044 | 0.00491 | 5.46              | 1.22            | Senp8         |
| 1422072_a_at       | -3.93          | 0.00045 | 0.00491 | 4.33              | 0.93            | Gstm6         |
| 1425548_a_at       | -3.93          | 0.00045 | 0.00494 | 4.97              | 1.02            | Lst1          |
| 1433503_at         | -3.92          | 0.00046 | 0.00499 | 10.25             | 0.81            | Zadh1         |
| 1418848_at         | -3.92          | 0.00046 | 0.00501 | 6.51              | 1.22            | Aqp7          |
| 1448979_at         | -3.92          | 0.00046 | 0.00504 | 8.62              | 0.86            | Muted         |
| 1428471_at         | -3.91          | 0.00046 | 0.00506 | 13.67             | 0.5             | Sorbs1        |
| 1419383_at         | -3.91          | 0.00047 | 0.00508 | 3.72              | 0.64            | S100b         |
| 1424831_at         | -3.91          | 0.00047 | 0.00508 | 4.77              | 1.22            | Cpne2         |
| 1429267_at         | -3.91          | 0.00047 | 0.00508 | 5.19              | 1.3             | Acot11        |
| 1431003_a_at       | -3.91          | 0.00047 | 0.00508 | 6.77              | 1.07            | 2610002J02Rik |
| 1420984_at         | -3.91          | 0.00047 | 0.00508 | 6.19              | 1.16            | Pctp          |
| 1417788_at         | -3.91          | 0.00047 | 0.0051  | 12.18             | 0.96            | Sncg          |
| 1455918_at         | -3.91          | 0.00048 | 0.00514 | 12.23             | 1.07            | Adrb3         |
| 1424140_at         | -3.9           | 0.00048 | 0.00514 | 3.38              | 0.8             | Gale          |
| 1434214_at         | -3.9           | 0.00048 | 0.00515 | 9.34              | 0.82            | 0910001L09Rik |
| 1460521_a_at       | -3.9           | 0.00048 | 0.00516 | 8.31              | 1.09            | Obfc2a        |
| 1423495_at         | -3.9           | 0.00048 | 0.0052  | 8.18              | 0.78            | Decr2         |
| 1452327_at         | -3.9           | 0.00049 | 0.00523 | 7.87              | 0.99            | Iqsec1        |
| 1431163_at         | -3.9           | 0.00049 | 0.00524 | 6.32              | 1.02            | 2700046G09Rik |
| 1421093_at         | -3.89          | 0.00049 | 0.00525 | 10.45             | 0.99            | Slc7a10       |
| 1419564_at         | -3.89          | 0.00049 | 0.00526 | 5.42              | 1.19            | Zfp467        |



| Probe <sup>1</sup> | t <sup>2</sup> | p-value | q-value | Mean <sup>3</sup> | FC <sup>4</sup> | Symbol        |
|--------------------|----------------|---------|---------|-------------------|-----------------|---------------|
| 1445279_at         | -3.89          | 0.00049 | 0.00526 | 7.6               | 1.29            | NA            |
| 1433463_at         | -3.89          | 0.0005  | 0.00535 | 9.45              | 0.73            | 0610010K06Rik |
| 1451606_at         | -3.88          | 0.0005  | 0.00535 | 6.81              | 1.59            | A530016L24Rik |
| 1429396_at         | -3.88          | 0.0005  | 0.00535 | 4.06              | 0.76            | Atg16l2       |
| 1435375_at         | -3.88          | 0.00051 | 0.00535 | 4.84              | 0.96            | BC052328      |
| 1456480_at         | -3.88          | 0.00051 | 0.00535 | 10.44             | 0.9             | Fry           |
| 1428874_at         | -3.88          | 0.00051 | 0.00536 | 8.55              | 0.81            | 1110019N10Rik |
| 1430030_at         | -3.88          | 0.00051 | 0.00537 | 7.4               | 1.08            | 5330426P16Rik |
| 1435910_at         | -3.88          | 0.00051 | 0.00538 | 10.68             | 0.94            | Fads3         |
| 1449070_x_at       | -3.88          | 0.00051 | 0.00541 | 12.17             | 1.01            | Apcdd1        |
| 1429326_at         | -3.88          | 0.00051 | 0.00541 | 4.38              | 0.85            | Cenpl         |
| 1449072_a_at       | -3.88          | 0.00052 | 0.00543 | 7.68              | 1.12            | N6amt2        |
| 1424863_a_at       | -3.87          | 0.00052 | 0.00544 | 9.35              | 0.89            | Hipk2         |
| 1448922_at         | -3.87          | 0.00052 | 0.00544 | 6.47              | 1.09            | Dusp19        |
| 1425598_a_at       | -3.87          | 0.00052 | 0.00549 | 7.22              | 1.05            | Lyn           |
| 1422645_at         | -3.87          | 0.00053 | 0.00549 | 10.07             | 1               | Hfe           |
| 1449130_at         | -3.86          | 0.00054 | 0.00559 | 13.55             | 0.63            | Cd1d1         |
| 1456907_at         | -3.86          | 0.00054 | 0.00561 | 5.95              | 1.12            | Cxcl9         |
| 1428505_at         | -3.86          | 0.00054 | 0.00564 | 10.51             | 0.68            | Ccdc90b       |
| 1426502_s_at       | -3.86          | 0.00055 | 0.00565 | 7.99              | 1.59            | Gpt           |
| 1435403_at         | -3.85          | 0.00055 | 0.00572 | 3.73              | 0.65            | 1700007L15Rik |
| 1439959_at         | -3.85          | 0.00055 | 0.00572 | 4.21              | 0.9             | Fgf11         |
| 1438728_at         | -3.85          | 0.00055 | 0.00572 | 4.6               | 0.92            | Nif3l1        |
| 1458019_at         | -3.85          | 0.00055 | 0.00572 | 3.22              | 0.7             | NA            |
| 1428433_at         | -3.85          | 0.00056 | 0.00575 | 12.2              | 0.72            | Hipk2         |
| 1421882_a_at       | -3.85          | 0.00056 | 0.00575 | 3.78              | 0.84            | Elavl2        |
| 1433445_x_at       | -3.85          | 0.00056 | 0.00575 | 12.29             | 0.59            | Hmgcs1        |
| 1418702_a_at       | -3.85          | 0.00056 | 0.00575 | 8.13              | 0.88            | 2810428I15Rik |
| 1422550_a_at       | -3.84          | 0.00057 | 0.0058  | 6.29              | 1.05            | Mtap6         |
| 1448631_a_at       | -3.84          | 0.00057 | 0.00581 | 5.06              | 1.57            | Hipk2         |
| 1429176_at         | -3.83          | 0.00058 | 0.00592 | 5.93              | 1.07            | Lrsam1        |
| 1427883_a_at       | -3.83          | 0.00058 | 0.00592 | 12.88             | 0.83            | Col3a1        |
| 1451232_at         | -3.83          | 0.00058 | 0.00593 | 11.13             | 0.72            | Cd151         |
| 1417272_at         | -3.83          | 0.00059 | 0.00597 | 8.61              | 0.84            | 9130005N14Rik |
| 1417903_at         | -3.83          | 0.00059 | 0.00599 | 5.7               | 1.1             | Dfna5h        |
| 1452829_at         | -3.83          | 0.00059 | 0.00599 | 6.06              | 0.99            | Cad           |
| 1433526_at         | -3.83          | 0.00059 | 0.006   | 5.18              | 1.21            | Klhl8         |
| 1434172_at         | -3.83          | 0.00059 | 0.006   | 7.42              | 1.37            | Cnr1          |
| 1416645_a_at       | -3.82          | 0.0006  | 0.00603 | 3.34              | 1.16            | Afp           |
| 1433728_at         | -3.82          | 0.0006  | 0.00605 | 10.83             | 0.93            | Glb1l2        |
| 1456307_s_at       | -3.82          | 0.0006  | 0.00607 | 9.21              | 1               | Adcy7         |
| 1437760_at         | -3.81          | 0.00061 | 0.00616 | 5.77              | 1.05            | Galnt12       |
| 1448536_at         | -3.81          | 0.00061 | 0.00616 | 10.39             | 0.74            | Lsm3          |
| 1422628_at         | -3.81          | 0.00061 | 0.00616 | 7.99              | 1.21            | 4632417K18Rik |
| 1448559_at         | -3.81          | 0.00061 | 0.00616 | 9.22              | 0.88            | Flot1         |
| 1434980_at         | -3.81          | 0.00061 | 0.00616 | 4.4               | 0.92            | Pik3r5        |
| 1415673_at         | -3.81          | 0.00062 | 0.00619 | 7.68              | 1.22            | Psph          |
| 1427404_x_at       | -3.81          | 0.00062 | 0.00625 | 11.48             | 0.65            | EG433182      |
| 1456361_at         | -3.81          | 0.00062 | 0.00625 | 6.26              | 1.06            | Afap1         |
| 1453708_a_at       | -3.81          | 0.00063 | 0.00625 | 4.34              | 0.87            | Gsto2         |
| 1422903_at         | -3.8           | 0.00063 | 0.00627 | 9.65              | 1.12            | Ly86          |
| 1423101_at         | -3.8           | 0.00063 | 0.00631 | 5.39              | 1.22            | Paqr4         |
| 1457625_s_at       | -3.8           | 0.00063 | 0.00632 | 4.42              | 0.93            | Cdkl2         |

| Probe <sup>1</sup> | t <sup>2</sup> | p-value | q-value | Mean <sup>3</sup> | FC <sup>4</sup> | Symbol        |
|--------------------|----------------|---------|---------|-------------------|-----------------|---------------|
| 1456022_at         | -3.8           | 0.00064 | 0.00632 | 9.58              | 1.09            | Hipk2         |
| 1416993_at         | -3.79          | 0.00064 | 0.00639 | 9.19              | 0.79            | Cog4          |
| 1448291_at         | -3.79          | 0.00065 | 0.0064  | 5.65              | 1.18            | Mmp9          |
| 1427989_at         | -3.79          | 0.00065 | 0.00641 | 3.58              | 1.02            | Amhr2         |
| 1457679_at         | -3.79          | 0.00065 | 0.00641 | 4.19              | 0.8             | Dclre1c       |
| 1429169_at         | -3.79          | 0.00065 | 0.00643 | 5.47              | 1.29            | Rbm3          |
| 1434528_at         | -3.79          | 0.00065 | 0.00643 | 6.8               | 1.21            | Aard          |
| 1460337_at         | -3.79          | 0.00066 | 0.00645 | 9.69              | 0.82            | Sh3kbp1       |
| 1419219_at         | -3.79          | 0.00066 | 0.00645 | 7.04              | 1.24            | Cyp4f18       |
| 1429196_at         | -3.79          | 0.00066 | 0.00647 | 7.82              | 1               | Rabgap1l      |
| 1451399_at         | -3.79          | 0.00066 | 0.00647 | 8.25              | 0.86            | Pnkd          |
| 1442174_at         | -3.78          | 0.00067 | 0.00653 | 5.86              | 1.15            | Tspan18       |
| 1428242_at         | -3.78          | 0.00067 | 0.00654 | 4.69              | 1.15            | Hmha1         |
| 1428085_at         | -3.78          | 0.00067 | 0.00654 | 9.52              | 0.75            | 1110057K04Rik |
| 1433786_x_at       | -3.78          | 0.00067 | 0.00657 | 11.61             | 0.65            | Serf2         |
| 1428540_at         | -3.78          | 0.00067 | 0.00658 | 7.43              | 1.16            | 3321401G04Rik |
| 1458404_at         | -3.78          | 0.00068 | 0.00659 | 6.01              | 1.01            | Ndufb8        |
| 1439622_at         | -3.78          | 0.00068 | 0.00661 | 7.33              | 1.15            | Rassf4        |
| 1434017_at         | -3.77          | 0.00068 | 0.00662 | 9.1               | 0.84            | NA            |
| 1453744_a_at       | -3.77          | 0.00068 | 0.00663 | 9.86              | 0.69            | Ankrd40       |
| 1435796_at         | -3.77          | 0.00068 | 0.00664 | 4.22              | 1.04            | NA            |
| 1415946_at         | -3.77          | 0.00069 | 0.00666 | 9.24              | 0.74            | Pigq          |
| 1435692_at         | -3.77          | 0.00069 | 0.00666 | 5.79              | 1.08            | Kctd21        |
| 1424217_at         | -3.77          | 0.00069 | 0.00671 | 3.74              | 0.76            | Papola        |
| 1421550_a_at       | -3.77          | 0.0007  | 0.00672 | 6.29              | 1.11            | Trim34        |
| 1447277_s_at       | -3.76          | 0.0007  | 0.00675 | 11.43             | 0.64            | Pcyox1        |
| 1423135_at         | -3.76          | 0.0007  | 0.00675 | 7.8               | 1.22            | Thy1          |
| 1455940_x_at       | -3.76          | 0.0007  | 0.00675 | 11.04             | 0.69            | Wdr6          |
| 1447100_s_at       | -3.76          | 0.0007  | 0.00675 | 8.52              | 0.81            | 5730508B09Rik |
| 1452599_s_at       | -3.76          | 0.00071 | 0.00676 | 6.59              | 0.93            | AI413582      |
| 1417218_at         | -3.76          | 0.00071 | 0.00677 | 5.08              | 0.95            | 2810048G17Rik |
| 1429934_at         | -3.76          | 0.00071 | 0.00679 | 3.99              | 0.82            | 4930502E18Rik |
| 1448590_at         | -3.76          | 0.00071 | 0.00682 | 10.99             | 0.89            | Col6a1        |
| 1418383_at         | -3.76          | 0.00072 | 0.00684 | 9.56              | 1.07            | Apcdd1        |
| 1452823_at         | -3.75          | 0.00072 | 0.00686 | 9.85              | 0.73            | Gstk1         |
| 1448640_at         | -3.75          | 0.00072 | 0.00688 | 4.62              | 0.86            | Slc14a1       |
| 1418716_at         | -3.75          | 0.00072 | 0.00688 | 6.35              | 1.05            | Mrps25        |
| 1419604_at         | -3.75          | 0.00073 | 0.00694 | 3.95              | 0.81            | Zbp1          |
| 1426398_at         | -3.75          | 0.00074 | 0.00696 | 9.66              | 0.69            | Ube2w         |
| 1448390_a_at       | -3.74          | 0.00074 | 0.00698 | 11.2              | 0.66            | Dhrs3         |
| 1448124_at         | -3.74          | 0.00074 | 0.007   | 9.45              | 0.87            | Gusb          |
| 1449443_at         | -3.74          | 0.00075 | 0.00703 | 8.79              | 0.89            | Decr1         |
| 1429525_s_at       | -3.74          | 0.00075 | 0.00703 | 5.78              | 0.96            | Myo1f         |
| 1422527_at         | -3.74          | 0.00075 | 0.00705 | 7.06              | 1.22            | H2-DMA        |
| 1429522_at         | -3.74          | 0.00075 | 0.00705 | 3.29              | 0.82            | Ankrd42       |
| 1428041_at         | -3.74          | 0.00076 | 0.00709 | 3.2               | 0.55            | 1600002H07Rik |
| 1417434_at         | -3.73          | 0.00076 | 0.00711 | 10.91             | 0.75            | Gpd2          |
| 1439487_at         | -3.73          | 0.00076 | 0.00714 | 6.49              | 1.14            | Lig4          |
| 1449124_at         | -3.73          | 0.00077 | 0.0072  | 8.99              | 0.76            | Rgl1          |
| 1447500_at         | -3.73          | 0.00078 | 0.00725 | 3.44              | 0.69            | Cux2          |
| 1421720_a_at       | -3.72          | 0.00078 | 0.00727 | 7.54              | 0.98            | Dtx2          |
| 1448319_at         | -3.72          | 0.00078 | 0.00727 | 10.77             | 0.69            | Akr1b3        |
| 1416022_at         | -3.72          | 0.00079 | 0.00729 | 11.15             | 0.77            | Fabp5         |

| Probe <sup>1</sup> | t <sup>2</sup> | p-value | q-value | Mean <sup>3</sup> | FC <sup>4</sup> | Symbol        |
|--------------------|----------------|---------|---------|-------------------|-----------------|---------------|
| 1420338_at         | -3.72          | 0.00079 | 0.00733 | 5.9               | 1.51            | Alox15        |
| 1458016_at         | -3.72          | 0.00079 | 0.00734 | 3.56              | 0.68            | NA            |
| 1418587_at         | -3.72          | 0.0008  | 0.00734 | 5.4               | 1.13            | Traf3         |
| 1420582_at         | -3.71          | 0.0008  | 0.0074  | 3.12              | 0.68            | Cd209e        |
| 1440928_at         | -3.71          | 0.00081 | 0.00743 | 6.3               | 1.06            | D630037F22Rik |
| 1445888_x_at       | -3.71          | 0.00081 | 0.00743 | 7.92              | 0.93            | Parp3         |
| 1450696_at         | -3.71          | 0.00081 | 0.00745 | 8.68              | 1.32            | Psmb9         |
| 1426562_a_at       | -3.71          | 0.00081 | 0.00746 | 5.36              | 1.18            | Olfm1         |
| 1434900_at         | -3.71          | 0.00081 | 0.00749 | 7.13              | 0.98            | Mkl1          |
| 1427195_at         | -3.71          | 0.00082 | 0.00749 | 6.41              | 1.21            | NA            |
| 1431119_at         | -3.7           | 0.00082 | 0.00756 | 5.83              | 1               | Dnajb13       |
| 1452864_at         | -3.7           | 0.00083 | 0.00758 | 5.21              | 0.96            | Med12l        |
| 1457728_at         | -3.7           | 0.00083 | 0.00758 | 3.86              | 0.76            | Bcnp1         |
| 1418398_a_at       | -3.7           | 0.00084 | 0.00764 | 6.19              | 1.48            | Tspan32       |
| 1429382_at         | -3.7           | 0.00084 | 0.00766 | 6.74              | 1.06            | Tomm40l       |
| 1426376_at         | -3.7           | 0.00084 | 0.00767 | 10.47             | 0.78            | Reep5         |
| 1452130_at         | -3.7           | 0.00084 | 0.0077  | 10.24             | 0.65            | Txndc14       |
| 1417575_at         | -3.69          | 0.00085 | 0.00775 | 4.02              | 0.77            | Otub2         |
| 1448211_at         | -3.69          | 0.00085 | 0.00775 | 9.78              | 0.81            | Atp6v0e2      |
| 1427510_at         | -3.69          | 0.00085 | 0.00775 | 10.2              | 0.65            | Gnai1         |
| 1428849_at         | -3.69          | 0.00086 | 0.00781 | 4.79              | 0.89            | Rps6kb1       |
| 1415975_at         | -3.69          | 0.00086 | 0.00781 | 8.98              | 0.81            | Carhsp1       |
| 1415919_at         | -3.69          | 0.00086 | 0.00781 | 9.5               | 0.72            | Npdc1         |
| 1460553_at         | -3.69          | 0.00087 | 0.00784 | 6.05              | 1.2             | 1700025K23Rik |
| 1416284_at         | -3.68          | 0.00087 | 0.00787 | 8.37              | 0.83            | Mrpl28        |
| 1452353_at         | -3.68          | 0.00088 | 0.00788 | 7.97              | 0.98            | Gpr155        |
| 1450869_at         | -3.68          | 0.00088 | 0.00788 | 8.52              | 0.93            | Fgf1          |
| 1417826_at         | -3.68          | 0.00088 | 0.0079  | 8.29              | 0.88            | Akr1e1        |
| 1455336_at         | -3.68          | 0.00089 | 0.00795 | 5.94              | 1.13            | Thap2         |
| 1428692_at         | -3.68          | 0.00089 | 0.00796 | 4.86              | 0.87            | Hddc3         |
| 1418704_at         | -3.67          | 0.00089 | 0.00798 | 9.04              | 0.69            | S100a13       |
| 1437273_at         | -3.67          | 0.00089 | 0.00798 | 7.33              | 1.35            | Htra4         |
| 1436944_x_at       | -3.67          | 0.0009  | 0.00798 | 12.01             | 0.7             | 4933439C20Rik |
| 1433969_at         | -3.67          | 0.0009  | 0.00802 | 3.69              | 0.8             | Cdkl4         |
| 1451018_at         | -3.67          | 0.00091 | 0.00804 | 9.35              | 0.67            | Leprotl1      |
| 1452954_at         | -3.67          | 0.00091 | 0.0081  | 4.7               | 1.5             | Ube2c         |
| 1422656_at         | -3.66          | 0.00092 | 0.00814 | 5.01              | 0.94            | Rasl2-9       |
| 1422411_s_at       | -3.66          | 0.00092 | 0.00814 | 9.5               | 0.81            | Ear3          |
| 1448384_at         | -3.66          | 0.00092 | 0.00815 | 4.4               | 0.93            | Pofut2        |
| 1417962_s_at       | -3.66          | 0.00093 | 0.00824 | 14.16             | 0.44            | Ghr           |
| 1450966_at         | -3.66          | 0.00093 | 0.00825 | 9.95              | 0.75            | Crot          |
| 1428313_at         | -3.66          | 0.00094 | 0.00825 | 4.01              | 0.78            | Zswim3        |
| 1429115_at         | -3.65          | 0.00095 | 0.00836 | 6.46              | 0.98            | 2010003O02Rik |
| 1438001_x_at       | -3.65          | 0.00095 | 0.00836 | 12.28             | 0.55            | Reep5         |
| 1460584_at         | -3.65          | 0.00096 | 0.00839 | 10.18             | 0.74            | Hisppd2a      |
| 1423678_at         | -3.65          | 0.00096 | 0.00839 | 7.65              | 0.86            | BC017643      |
| 1443882_at         | -3.65          | 0.00096 | 0.00839 | 5.85              | 1.05            | NA            |
| 1418873_at         | -3.65          | 0.00096 | 0.00841 | 7                 | 1.08            | Sfxn4         |
| 1417214_at         | -3.65          | 0.00096 | 0.00842 | 5.09              | 0.9             | Rab27b        |
| 1415971_at         | -3.65          | 0.00097 | 0.00844 | 12.58             | 0.58            | Marcks        |
| 1416263_at         | -3.65          | 0.00097 | 0.00845 | 5.1               | 0.88            | Abcb9         |
| 1417456_at         | -3.64          | 0.00097 | 0.00849 | 10.28             | 0.91            | Gnpat         |
| 1455236_x_at       | -3.64          | 0.00098 | 0.0085  | 11.61             | 0.63            | Serf2         |

| Probe <sup>1</sup> | t <sup>2</sup> | p-value | q-value | Mean <sup>3</sup> | FC <sup>4</sup> | Symbol        |
|--------------------|----------------|---------|---------|-------------------|-----------------|---------------|
| 1417975_at         | -3.64          | 0.00098 | 0.00852 | 5.26              | 1               | Kpna4         |
| 1416021_a_at       | -3.64          | 0.00099 | 0.00853 | 12.58             | 0.6             | Fabp5         |
| 1417756_a_at       | -3.64          | 0.00099 | 0.00854 | 9.42              | 0.78            | Lsp1          |
| 1425738_at         | -3.64          | 0.00099 | 0.00854 | 8.48              | 2.16            | Igk-V1        |
| 1415932_x_at       | -3.64          | 0.00099 | 0.00855 | 8.71              | 0.85            | Atp9a         |
| 1447184_at         | -3.64          | 0.00099 | 0.00855 | 3.96              | 0.77            | AU021760      |
| 1427301_at         | -3.64          | 0.00099 | 0.00855 | 8.56              | 0.87            | Cd48          |
| 1460216_at         | -3.63          | 0.00101 | 0.00868 | 8.06              | 0.91            | Acads         |
| 1429234_s_at       | -3.63          | 0.00102 | 0.0087  | 8.23              | 0.8             | Sep-11        |
| 1421063_s_at       | -3.63          | 0.00102 | 0.00872 | 8.09              | 1.07            | Snurf         |
| 1454799_at         | -3.62          | 0.00102 | 0.00877 | 10.15             | 0.92            | Agpat9        |
| 1418204_s_at       | -3.62          | 0.00103 | 0.00877 | 6.69              | 1.26            | Aif1          |
| 1448407_at         | -3.62          | 0.00103 | 0.0088  | 6.6               | 0.95            | 4632428N05Rik |
| 1428873_a_at       | -3.62          | 0.00103 | 0.0088  | 6.57              | 1.08            | 4121402D02Rik |
| 1416122_at         | -3.62          | 0.00104 | 0.00882 | 10.92             | 0.86            | Ccnd2         |
| 1436737_a_at       | -3.62          | 0.00104 | 0.00885 | 13.65             | 0.46            | Sorbs1        |
| 1451541_at         | -3.62          | 0.00104 | 0.00887 | 5.53              | 0.97            | Bcs1l         |
| 1423394_at         | -3.62          | 0.00105 | 0.00888 | 9.21              | 0.73            | Pcyox1        |
| 1434827_at         | -3.61          | 0.00105 | 0.00894 | 4.7               | 0.86            | Thoc6         |
| 1433444_at         | -3.61          | 0.00106 | 0.00896 | 12.27             | 0.56            | Hmgcs1        |
| 1435425_at         | -3.61          | 0.00106 | 0.00899 | 4.1               | 0.66            | Pisd          |
| 1450455_s_at       | -3.61          | 0.00106 | 0.00899 | 9.28              | 0.75            | Akr1c12       |
| 1434665_at         | -3.61          | 0.00107 | 0.009   | 10.32             | 0.72            | Aga           |
| 1435328_at         | -3.61          | 0.00107 | 0.00901 | 6.74              | 0.98            | Cyhr1         |
| 1429065_at         | -3.61          | 0.00108 | 0.00905 | 8                 | 0.87            | 120009F10Rik  |
| 1416356_at         | -3.61          | 0.00108 | 0.00905 | 7.88              | 0.9             | Gmpr2         |
| 1442074_at         | -3.61          | 0.00108 | 0.00905 | 6.41              | 1.77            | Clec2g        |
| 1456288_at         | -3.6           | 0.00109 | 0.0091  | 9.64              | 0.73            | Sifn5         |
| 1419022_a_at       | -3.6           | 0.00109 | 0.00912 | 10.75             | 0.64            | Eno1          |
| 1458425_at         | -3.6           | 0.00109 | 0.00914 | 3.93              | 0.78            | Myl6b         |
| 1420690_at         | -3.6           | 0.0011  | 0.00916 | 3.75              | 0.66            | Fgf10         |
| 1453241_a_at       | -3.6           | 0.0011  | 0.00921 | 4.34              | 0.81            | 2810047C21Rik |
| 1419809_s_at       | -3.6           | 0.00111 | 0.00922 | 9.44              | 0.68            | Cog4          |
| 1440840_at         | -3.6           | 0.00111 | 0.00922 | 6.43              | 1.24            | D630004K10Rik |
| 1455860_at         | -3.59          | 0.00111 | 0.00923 | 7.21              | 0.89            | Pigh          |
| 1416503_at         | -3.59          | 0.00111 | 0.00923 | 7.99              | 0.89            | Lxn           |
| 1443007_at         | -3.59          | 0.00111 | 0.00923 | 4.43              | 0.85            | NA            |
| 1452393_at         | -3.59          | 0.00112 | 0.00923 | 5.88              | 1.17            | Akna          |
| 1452789_at         | -3.59          | 0.00112 | 0.00926 | 8.69              | 0.86            | Snn           |
| 1421818_at         | -3.59          | 0.00113 | 0.00933 | 9.39              | 0.72            | Bcl6          |
| 1450034_at         | -3.59          | 0.00113 | 0.00933 | 9.12              | 1.09            | Stat1         |
| 1449377_at         | -3.59          | 0.00114 | 0.0094  | 7.52              | 1.02            | Nicn1         |
| 1429125_at         | -3.58          | 0.00114 | 0.00941 | 5.89              | 0.99            | Zbtb9         |
| 1424118_a_at       | -3.58          | 0.00114 | 0.00942 | 4.7               | 1.05            | Spc25         |
| 1452381_at         | -3.58          | 0.00115 | 0.00944 | 8.17              | 0.79            | Creb3l2       |
| 1452550_a_at       | -3.58          | 0.00115 | 0.0095  | 5.88              | 1.37            | Fmr1          |
| 1451895_a_at       | -3.58          | 0.00116 | 0.00951 | 4.7               | 0.94            | Dhcr24        |
| 1426794_at         | -3.58          | 0.00116 | 0.00952 | 6.51              | 1.03            | Ptprs         |
| 1440787_s_at       | -3.58          | 0.00116 | 0.00954 | 3.77              | 0.71            | Bbs10         |
| 1418664_at         | -3.58          | 0.00117 | 0.00958 | 10.89             | 0.72            | Mpdz          |
| 1425078_x_at       | -3.58          | 0.00117 | 0.00958 | 5.45              | 1.3             | C130026I21Rik |
| 1437639_at         | -3.58          | 0.00117 | 0.00958 | 6.61              | 1.2             | 3321401G04Rik |
| 1426970_a_at       | -3.57          | 0.00118 | 0.0096  | 6.35              | 1.01            | Ube1l         |

| Probe <sup>1</sup> | t <sup>2</sup> | p-value | q-value | Mean <sup>3</sup> | FC <sup>4</sup> | Symbol        |
|--------------------|----------------|---------|---------|-------------------|-----------------|---------------|
| 1418737_at         | -3.57          | 0.00118 | 0.00962 | 9.17              | 0.79            | Nudt2         |
| 1448111_at         | -3.57          | 0.00118 | 0.00962 | 10.47             | 0.63            | Ctps2         |
| 1423362_at         | -3.57          | 0.00119 | 0.0097  | 9.78              | 0.93            | Sort1         |
| 1418123_at         | -3.57          | 0.0012  | 0.00972 | 7.9               | 0.99            | Unc119        |
| 1436022_at         | -3.57          | 0.0012  | 0.00972 | 4.11              | 0.77            | Endogl1       |
| 1449265_at         | -3.57          | 0.0012  | 0.00975 | 8.87              | 0.78            | Casp1         |
| 1440172_s_at       | -3.57          | 0.0012  | 0.00975 | 3.56              | 0.62            | 1700113H08Rik |
| 1442348_at         | -3.56          | 0.00121 | 0.00976 | 5.22              | 0.98            | NA            |
| 1430287_s_at       | -3.56          | 0.00121 | 0.00976 | 6.06              | 0.95            | Hemk1         |
| 1420817_at         | -3.56          | 0.00121 | 0.00977 | 10.26             | 1.01            | Ywhag         |
| 1460603_at         | -3.56          | 0.00122 | 0.00984 | 9.42              | 0.7             | Samd9l        |
| 1436072_at         | -3.56          | 0.00122 | 0.00985 | 7.05              | 0.92            | 5830428H23Rik |
| 1455213_at         | -3.56          | 0.00122 | 0.00985 | 6.82              | 1.14            | 4930488E11Rik |
| 1438962_s_at       | -3.56          | 0.00123 | 0.00989 | 3.47              | 0.55            | Ddx31         |
| 1416481_s_at       | -3.56          | 0.00123 | 0.00989 | 6.07              | 1.26            | Higd1a        |
| 1433491_at         | -3.55          | 0.00124 | 0.00994 | 8.48              | 0.99            | Epb4.1l2      |
| 1452754_at         | -3.55          | 0.00124 | 0.00994 | 8.7               | 0.86            | Creld2        |
| 1441339_at         | -3.55          | 0.00124 | 0.00994 | 3.25              | 0.53            | Chd9          |
| 1416357_a_at       | -3.55          | 0.00125 | 0.00998 | 9.76              | 0.63            | Mcam          |
| 1419104_at         | -3.55          | 0.00125 | 0.01    | 5.82              | 1.02            | Abhd6         |
| 1437454_a_at       | -3.55          | 0.00125 | 0.01    | 9.79              | 0.71            | Txndc14       |
| 1427604_a_at       | -3.55          | 0.00125 | 0.01    | 8.73              | 0.83            | Atp9a         |

**Table S4b. Footnote**

Gene lists were generated using the Cyber-T method, with only genes with a *q*-value < 0.01 presented.

<sup>1</sup> *Probe* represents the Affymetrix probe set identifier.

<sup>2</sup> *t* represents the t-statistic output from the Cyber-T method.

<sup>3</sup> *Mean* represents the mean expression signal after normalization.

<sup>4</sup> *FC* represents the log<sub>2</sub> fold change in normalized signals.

Table S5

|                                   | Mean adult lifespan (days) $\pm$ s.e.m. | <i>p</i> value vs control | n dead/Total |
|-----------------------------------|-----------------------------------------|---------------------------|--------------|
| WT                                | 20.62 $\pm$ 0.54                        | -                         | 44/52        |
| <i>aak-2(ok524)</i>               | 16.72 $\pm$ 0.46                        | 0.0001*                   | 35/41        |
| <i>rsk-1(pk1255)</i>              | 23.09 $\pm$ 0.66                        | 0.0028*                   | 48/58        |
| <i>aak-2(ok524);rsk-1(pk1255)</i> | 16.31 $\pm$ 0.49                        | 0.0001*                   | 40/49        |
|                                   |                                         | 0.0001**                  |              |
|                                   |                                         | 0.6028***                 |              |

Table S5: Statistical analysis of *C. elegans* lifespan experiments.

Data corresponds to that presented in Fig. 3C. \* control = *N2* \*\* control = *rsk-1(pk1255)* \*\*\* control = *aak-2(ok524)*. Lifespan was analysed using the log rank test. n refers to the number of animals scored as dead vs the total number of animals present at the start of the experiment. Animals were censored if they exhibited *egl* phenotypes, exploded or escaped. This is data from one representative experiment.

### *Supporting References*

- S1. H. Shima *et al.*, *Embo J* **17**, 6649 (1998).
- S2. C. Selman *et al.*, *Faseb J* **22**, 807 (2008).
- S3. C. Selman, S. Lingard, D. Gems, L. Partridge, D. J. Withers, *Science* **320**, 1012; author reply 1012 (2008).
- S4. A. Taguchi, L. M. Wartschow, M. F. White, *Science* **317**, 369 (2007).
- S5. E. F. Schuster, E. Blanc, L. Partridge, J. M. Thornton, *Genome Biol* **8**, R126 (2007).
- S6. M. Foretz, D. Carling, C. Guichard, P. Ferre, F. Foufelle, *J Biol Chem* **273**, 14767 (1998).
- S7. A. Woods *et al.*, *J Biol Chem* **271**, 10282 (1996).
- S8. S. P. Davies, D. Carling, D. G. Hardie, *Eur J Biochem* **186**, 123 (1989).
- S9. R. S. Kamath, M. Martinez-Campos, P. Zipperlen, A. G. Fraser, J. Ahringer, *Genome Biol* **2**, RESEARCH0002 (2001).
- S10. H. Lee *et al.*, *J Biol Chem* **283**, 14988 (2008).
